# Supplementary material for: CeGAL: Redefining a Widespread Fungal-Specific Transcription Factor Family Using an In Silico Error-Tracking Approach
Source: MDPI journal article supplement (doi:10.3390/jof9040424), 2023-03-29
Supplement: s1 [file s1]

Table S3. Results of the analysis of 253 MHD-containing sequences in the SGD database.

| SGD sequence identifier | Source of error | C6 motif | hmmsearch E-value |
|-------------------------|-----------------|----------|-------------------|
| YAL051W_FostersB        | FRAMESHIFT      | FULL     | 7.0e-16           |
| YAL051W_FostersO        | FRAMESHIFT      | FULL     | 7.0e-16           |
| YAL051W_LalvinQA23      | FRAMESHIFT      | FULL     | 7.0e-16           |
| YAL051W_Vin13           | FRAMESHIFT      | FULL     | 7.0e-16           |
| YAL051W_VL3             | FRAMESHIFT      | FULL     | 7.0e-16           |
| YBL005W_AWRI796         | FRAMESHIFT      | FULL     | 8.2e-13           |
| YBL005W_FostersO        | FRAMESHIFT      | FULL     | 8.5e-13           |
| YBL005W_YJM269          | FRAMESHIFT      | FULL     | 8.4e-13           |
| YBL066C_AWRI796         | FRAMESHIFT      | FULL     | 2.8e-15           |
| YBL066C_FostersO        | FRAMESHIFT      | FULL     | 6.5e-15           |
| YBL066C_LalvinQA23      | FRAMESHIFT      | FULL     | 2.8e-15           |
| YBL066C_Vin13           | FRAMESHIFT      | FULL     | 2.8e-15           |
| YBL066C_YJM269          | FRAMESHIFT      | FULL     | 2.8e-15           |
| YBR033W_AWRI796         | FRAMESHIFT      | FULL     | 6.4e-13           |
| YBR033W_CBS7960         | START CODON     | FULL     | 6.6e-13           |
| YBR033W_FostersB        | FRAMESHIFT      | FULL     | 6.5e-13           |
| YBR033W_K11             | START CODON     | FULL     | 6.7e-13           |
| YBR033W_Kyokai7         | START CODON     | FULL     | 6.7e-13           |
| YBR033W_RedStar         | START CODON     | FULL     | 6.6e-13           |
| YBR033W_T7              | START CODON     | FULL     | 6.2e-13           |
| YBR033W_UC5             | START CODON     | FULL     | 6.7e-13           |
| YBR033W_VL3             | FRAMESHIFT      | FULL     | 6.5e-13           |
| YBR033W_YPS128          | START CODON     | FULL     | 6.6e-13           |
| YBR033W_YPS163          | START CODON     | FULL     | 6.6e-13           |
| YBR033W_YS9             | START CODON     | FULL     | 6.5e-13           |
| YBR033W_ZTW1            | FRAMESHIFT      | FULL     | 6.6e-13           |
| YBR150C_LalvinQA23      | FRAMESHIFT      | FULL     | 1.3e-12           |
| YBR150C_Vin13           | FRAMESHIFT      | FULL     | 1.3e-12           |
| YBR150C_VL3             | FRAMESHIFT      | FULL     | 1.2e-12           |
| YBR297W_AWRI1631        | FRAMESHIFT      | FULL     | 2.3e-17           |
| YBR297W_AWRI796         | FRAMESHIFT      | FULL     | 2.4e-17           |
| YBR297W_BC187           | SCAFFOLD        | FULL     | 2.3e-17           |
| YBR297W_FY1679          | Unknown         | FULL     | 3.0e-17           |
| YBR297W_Vin13           | SCAFFOLD        | FULL     | 5.1e-17           |
| YBR297W_W303            | Unknown         | FULL     | 3.0e-17           |
| YBR297W_X2180-1A        | Unknown         | FULL     | 3.0e-17           |
| YCR106W_AWRI796         | FRAMESHIFT      | FULL     | 1.4e-13           |
| YCR106W_BY4741          | SCAFFOLD        | NONE     | 1.0e+03           |

|                    |                            |         |         |
|--------------------|----------------------------|---------|---------|
| YCR106W_BY4742     | Undetermined genome region | FULL    | 1.4e-13 |
| YCR106W_CBS7960    | REPEAT                     | FULL    | 1.4e-13 |
| YCR106W_FY1679     | FRAMESHIFT                 | FULL    | 7.2e-09 |
| YCR106W_LalvinQA23 | FRAMESHIFT                 | FULL    | 1.4e-13 |
| YCR106W_M22        | FRAMESHIFT                 | FULL    | 1.4e-13 |
| YCR106W_Sigma1278b | SCAFFOLD                   | NONE    | 1.0e+03 |
| YCR106W_Vin13      | FRAMESHIFT                 | FULL    | 1.4e-13 |
| YCR106W_VL3        | FRAMESHIFT                 | FULL    | 1.4e-13 |
| YCR106W_W303       | SCAFFOLD                   | NONE    | 1.0e+03 |
| YCR106W_X2180-1A   | SCAFFOLD                   | NONE    | 1.0e+03 |
| YCR106W_YPH499     | Undetermined genome region | FULL    | 1.4e-13 |
| YCR106W_YPS128     | SCAFFOLD                   | PARTIAL | 2.0e-07 |
| YCR106W_YPS163     | SCAFFOLD                   | PARTIAL | 4.4e-07 |
| YDR303C_EC1118     | FRAMESHIFT                 | FULL    | 1.1e-12 |
| YDR303C_FostersB   | FRAMESHIFT                 | FULL    | 1.1e-12 |
| YDR303C_FostersO   | FRAMESHIFT                 | FULL    | 1.1e-12 |
| YDR303C_Vin13      | START CODON                | FULL    | 1.1e-12 |
| YDR303C_VL3        | FRAMESHIFT                 | FULL    | 4.3e-12 |
| YDR421W_FostersB   | FRAMESHIFT                 | FULL    | 9.0e-12 |
| YDR421W_FostersO   | FRAMESHIFT                 | FULL    | 9.1e-12 |
| YDR421W_JAY291     | START CODON                | FULL    | 8.9e-12 |
| YDR520C_AWRI796    | FRAMESHIFT                 | FULL    | 8.3e-10 |
| YDR520C_CLIB324    | FRAMESHIFT                 | FULL    | 8.3e-10 |
| YDR520C_FostersB   | FRAMESHIFT                 | FULL    | 8.2e-10 |
| YER184C_AWRI796    | FRAMESHIFT                 | FULL    | 1.9e-13 |
| YER184C_FostersB   | FRAMESHIFT                 | FULL    | 2.0e-13 |
| YER184C_FostersO   | FRAMESHIFT                 | FULL    | 2.9e-13 |
| YER184C_LalvinQA23 | FRAMESHIFT                 | FULL    | 1.9e-13 |
| YER184C_Vin13      | FRAMESHIFT                 | PARTIAL | 3.2e-11 |
| YER184C_ZTW1       | FRAMESHIFT                 | FULL    | 2.0e-13 |
| YGL013C_CLIB215    | FRAMESHIFT                 | FULL    | 4.7e-14 |
| YGL013C_FostersB   | FRAMESHIFT                 | FULL    | 4.7e-14 |
| YGL013C_FostersO   | FRAMESHIFT                 | FULL    | 4.7e-14 |
| YGL013C_Vin13      | FRAMESHIFT                 | FULL    | 4.7e-14 |
| YGR288W_FostersB   | START CODON                | FULL    | 2.1e-14 |
| YGR288W_FostersO   | START CODON                | FULL    | 2.1e-14 |
| YGR288W_VL3        | START CODON                | FULL    | 2.2e-14 |
| YHR056C_FostersB   | FRAMESHIFT                 | FULL    | 3.3e-12 |
| YHR056C_M22        | SCAFFOLD BORDER            | NONE    | 1.0e+03 |
| YHR056C_RM11-1a    | START CODON                | FULL    | 3.6e-12 |
| YHR056C_T73        | FRAMESHIFT                 | FULL    | 1.2e-12 |

|                    |             |      |         |
|--------------------|-------------|------|---------|
| YHR056C_VL3        | FRAMESHIFT  | FULL | 3.6e-12 |
| YHR178W_FostersO   | FRAMESHIFT  | FULL | 7.1e-13 |
| YHR178W_Vin13      | FRAMESHIFT  | FULL | 7.1e-13 |
| YHR178W_VL3        | FRAMESHIFT  | FULL | 7.1e-13 |
| YHR178W_ZTW1       | FRAMESHIFT  | FULL | 7.1e-13 |
| YIL130W_AWRI796    | FRAMESHIFT  | FULL | 3.9e-15 |
| YIL130W_FostersB   | FRAMESHIFT  | FULL | 5.1e-13 |
| YIL130W_FostersO   | FRAMESHIFT  | FULL | 5.1e-13 |
| YIL130W_LalvinQA23 | FRAMESHIFT  | FULL | 3.9e-15 |
| YIL130W_Vin13      | FRAMESHIFT  | FULL | 3.9e-15 |
| YIL130W_VL3        | FRAMESHIFT  | FULL | 3.9e-15 |
| YIL130W_Y55        | FRAMESHIFT  | FULL | 3.9e-15 |
| YIR023W_AWRI796    | FRAMESHIFT  | FULL | 4.7e-12 |
| YIR023W_EC1118     | FRAMESHIFT  | FULL | 4.7e-12 |
| YIR023W_FostersB   | FRAMESHIFT  | FULL | 4.8e-12 |
| YIR023W_FostersO   | FRAMESHIFT  | FULL | 1.2e-11 |
| YIR023W_LalvinQA23 | FRAMESHIFT  | FULL | 4.5e-12 |
| YIR023W_T73        | FRAMESHIFT  | FULL | 4.7e-12 |
| YIR023W_VL3        | FRAMESHIFT  | FULL | 4.5e-12 |
| YIR023W_YJM269     | FRAMESHIFT  | FULL | 4.7e-12 |
| YJL089W_AWRI796    | FRAMESHIFT  | FULL | 2.6e-15 |
| YJL089W_FostersB   | FRAMESHIFT  | FULL | 2.6e-15 |
| YJL089W_FostersO   | FRAMESHIFT  | FULL | 2.6e-15 |
| YJL089W_LalvinQA23 | FRAMESHIFT  | FULL | 2.6e-15 |
| YJL089W_VL3        | FRAMESHIFT  | FULL | 2.6e-15 |
| YJL206C_AWRI796    | FRAMESHIFT  | FULL | 1.0e-13 |
| YJL206C_CBS7960    | FRAMESHIFT  | FULL | 1.0e-13 |
| YJL206C_CLIB215    | FRAMESHIFT  | FULL | 1.0e-13 |
| YJL206C_FostersB   | FRAMESHIFT  | FULL | 1.1e-13 |
| YJL206C_Sigma1278b | START CODON | FULL | 1.0e-13 |
| YJL206C_Vin13      | FRAMESHIFT  | FULL | 1.0e-13 |
| YKL015W_AWRI796    | FRAMESHIFT  | FULL | 1.1e-14 |
| YKL015W_FostersB   | FRAMESHIFT  | FULL | 1.1e-14 |
| YKL015W_FostersO   | FRAMESHIFT  | FULL | 7.9e-14 |
| YKL015W_LalvinQA23 | FRAMESHIFT  | FULL | 1.1e-14 |
| YKL015W_T73        | FRAMESHIFT  | FULL | 1.0e-14 |
| YKL015W_Vin13      | FRAMESHIFT  | FULL | 2.2e-14 |
| YKL015W_VL3        | FRAMESHIFT  | FULL | 2.2e-14 |
| YKL015W_YJM269     | FRAMESHIFT  | FULL | 1.1e-14 |
| YKL038W_D273-10B   | START CODON | FULL | 5.3e-14 |
| YKL038W_DBVPG6044  | START CODON | FULL | 5.3e-14 |
| YKL038W_EC1118     | FRAMESHIFT  | FULL | 5.3e-14 |
| YKL038W_EC9-8      | FRAMESHIFT  | FULL | 5.3e-14 |

|                    |             |         |         |
|--------------------|-------------|---------|---------|
| YKL038W_FostersB   | START CODON | FULL    | 5.3e-14 |
| YKL038W_FostersO   | FRAMESHIFT  | FULL    | 5.3e-14 |
| YKL038W_K11        | START CODON | FULL    | 5.3e-14 |
| YKL038W_Kyokai7    | START CODON | FULL    | 5.3e-14 |
| YKL038W_LalvinQA23 | FRAMESHIFT  | FULL    | 5.3e-14 |
| YKL038W_PW5        | START CODON | FULL    | 5.3e-14 |
| YKL038W_RedStar    | START CODON | FULL    | 5.2e-14 |
| YKL038W_Sigma1278b | START CODON | FULL    | 5.3e-14 |
| YKL038W_SK1        | START CODON | FULL    | 5.3e-14 |
| YKL038W_T7         | START CODON | FULL    | 5.3e-14 |
| YKL038W_UC5        | FRAMESHIFT  | FULL    | 5.3e-14 |
| YKL038W_Vin13      | FRAMESHIFT  | FULL    | 5.3e-14 |
| YKL038W_VL3        | FRAMESHIFT  | FULL    | 5.3e-14 |
| YKL038W_Y55        | START CODON | FULL    | 5.3e-14 |
| YKL038W_YJM339     | START CODON | FULL    | 5.4e-14 |
| YKL038W_YJM789     | START CODON | FULL    | 5.3e-14 |
| YKL038W_YS9        | START CODON | FULL    | 5.3e-14 |
| YKL038W_ZTW1       | START CODON | FULL    | 5.3e-14 |
| YKL222C_AWRI1631   | FRAMESHIFT  | FULL    | 3.9e-10 |
| YKL222C_CBS7960    | FRAMESHIFT  | FULL    | 3.9e-10 |
| YKL222C_EC9-8      | START CODON | FULL    | 3.9e-10 |
| YKL222C_FostersB   | FRAMESHIFT  | FULL    | 2.0e-10 |
| YKL222C_FostersO   | FRAMESHIFT  | FULL    | 3.9e-10 |
| YKL222C_LalvinQA23 | START CODON | FULL    | 3.9e-10 |
| YKL222C_PW5        | START CODON | FULL    | 3.9e-10 |
| YKL222C_Vin13      | FRAMESHIFT  | FULL    | 3.9e-10 |
| YKL222C_VL3        | FRAMESHIFT  | FULL    | 3.9e-10 |
| YKL222C_ZTW1       | START CODON | FULL    | 3.9e-10 |
| YKR064W_AWRI796    | FRAMESHIFT  | FULL    | 1.4e-13 |
| YKR064W_CBS7960    | FRAMESHIFT  | FULL    | 1.5e-13 |
| YKR064W_EC1118     | FRAMESHIFT  | FULL    | 1.4e-13 |
| YKR064W_FostersB   | FRAMESHIFT  | FULL    | 1.4e-13 |
| YKR064W_FostersO   | FRAMESHIFT  | PARTIAL | 4.5e-11 |
| YKR064W_LalvinQA23 | FRAMESHIFT  | FULL    | 1.3e-13 |
| YKR064W_Vin13      | FRAMESHIFT  | FULL    | 1.4e-13 |
| YKR064W_VL3        | FRAMESHIFT  | FULL    | 1.4e-13 |
| YKR064W_YJM269     | FRAMESHIFT  | FULL    | 1.5e-13 |
| YLL054C_AWRI1631   | START CODON | FULL    | 5.9e-12 |
| YLL054C_AWRI796    | FRAMESHIFT  | FULL    | 5.8e-12 |
| YLL054C_CLIB324    | FRAMESHIFT  | FULL    | 5.9e-12 |
| YLL054C_EC1118     | FRAMESHIFT  | FULL    | 5.8e-12 |
| YLL054C_FostersB   | FRAMESHIFT  | FULL    | 5.9e-12 |
| YLL054C_FostersO   | FRAMESHIFT  | FULL    | 5.9e-12 |

|                    |             |      |         |
|--------------------|-------------|------|---------|
| YLL054C_LalvinQA23 | FRAMESHIFT  | FULL | 5.9e-12 |
| YLL054C_PW5        | START CODON | FULL | 5.8e-12 |
| YLL054C_Vin13      | FRAMESHIFT  | FULL | 5.9e-12 |
| YLL054C_VL3        | FRAMESHIFT  | FULL | 5.8e-12 |
| YLL054C_ZTW1       | FRAMESHIFT  | FULL | 6.9e-12 |
| YLR014C_AWRI1631   | FRAMESHIFT  | FULL | 8.4e-15 |
| YLR014C_AWRI796    | FRAMESHIFT  | FULL | 8.4e-15 |
| YLR014C_CLIB215    | FRAMESHIFT  | FULL | 8.4e-15 |
| YLR014C_FostersB   | FRAMESHIFT  | FULL | 1.9e-14 |
| YLR014C_FostersO   | FRAMESHIFT  | FULL | 8.4e-15 |
| YLR014C_LalvinQA23 | FRAMESHIFT  | FULL | 8.5e-15 |
| YLR014C_Vin13      | FRAMESHIFT  | FULL | 8.4e-15 |
| YLR014C_VL3        | FRAMESHIFT  | FULL | 8.4e-15 |
| YLR098C_AWRI796    | FRAMESHIFT  | FULL | 7.7e-15 |
| YLR098C_FostersB   | FRAMESHIFT  | FULL | 7.7e-15 |
| YLR098C_FostersO   | FRAMESHIFT  | FULL | 7.7e-15 |
| YLR098C_LalvinQA23 | FRAMESHIFT  | FULL | 7.7e-15 |
| YLR256W_FostersO   | FRAMESHIFT  | FULL | 1.9e-12 |
| YLR266C_AWRI796    | FRAMESHIFT  | FULL | 1.2e-10 |
| YLR266C_FostersB   | FRAMESHIFT  | FULL | 1.1e-10 |
| YLR266C_FostersO   | START CODON | FULL | 1.0e-10 |
| YLR266C_Vin13      | START CODON | FULL | 1.9e-08 |
| YLR266C_VL3        | FRAMESHIFT  | FULL | 1.1e-10 |
| YLR278C_CBS7960    | Unknown     | FULL | 8.8e-11 |
| YLR278C_CLIB215    | FRAMESHIFT  | FULL | 8.7e-11 |
| YLR278C_FostersO   | FRAMESHIFT  | FULL | 8.7e-11 |
| YLR451W_LalvinQA23 | START CODON | FULL | 1.4e-12 |
| YML076C_AWRI796    | FRAMESHIFT  | FULL | 2.1e-06 |
| YML076C_CLIB215    | START CODON | FULL | 1.8e-07 |
| YML076C_FostersB   | FRAMESHIFT  | FULL | 5.8e-06 |
| YML076C_FostersO   | FRAMESHIFT  | FULL | 2.1e-06 |
| YML076C_LalvinQA23 | FRAMESHIFT  | FULL | 2.1e-06 |
| YMR019W_FostersO   | FRAMESHIFT  | FULL | 4.9e-12 |
| YMR019W_LalvinQA23 | FRAMESHIFT  | FULL | 1.2e-12 |
| YMR019W_Vin13      | FRAMESHIFT  | FULL | 2.5e-12 |
| YMR168C_AWRI1631   | FRAMESHIFT  | FULL | 5.6e-13 |
| YMR280C_AWRI796    | FRAMESHIFT  | FULL | 6.0e-15 |
| YMR280C_FostersB   | FRAMESHIFT  | FULL | 6.0e-15 |
| YMR280C_FostersO   | FRAMESHIFT  | FULL | 6.0e-15 |
| YMR280C_LalvinQA23 | FRAMESHIFT  | FULL | 6.0e-15 |
| YMR280C_RedStar    | FRAMESHIFT  | FULL | 5.9e-15 |
| YMR280C_Vin13      | FRAMESHIFT  | FULL | 6.0e-15 |
| YMR280C_YJM269     | FRAMESHIFT  | FULL | 5.8e-15 |

|                    |             |         |         |
|--------------------|-------------|---------|---------|
| YNR063W_AWRI796    | FRAMESHIFT  | FULL    | 2.2e-14 |
| YNR063W_CLIB215    | FRAMESHIFT  | FULL    | 2.2e-14 |
| YNR063W_FostersO   | FRAMESHIFT  | FULL    | 1.4e-14 |
| YNR063W_PW5        | FRAMESHIFT  | FULL    | 3.3e-14 |
| YNR063W_VL3        | FRAMESHIFT  | FULL    | 2.3e-14 |
| YOL089C_AWRI796    | FRAMESHIFT  | FULL    | 3.3e-13 |
| YOL089C_CBS7960    | FRAMESHIFT  | FULL    | 3.3e-13 |
| YOL089C_FostersB   | FRAMESHIFT  | FULL    | 3.3e-13 |
| YOL089C_FostersO   | FRAMESHIFT  | FULL    | 4.2e-13 |
| YOL089C_L1528      | START CODON | FULL    | 3.3e-13 |
| YOL089C_LalvinQA23 | FRAMESHIFT  | FULL    | 3.3e-13 |
| YOL089C_PW5        | FRAMESHIFT  | FULL    | 3.3e-13 |
| YOL089C_Vin13      | FRAMESHIFT  | FULL    | 3.3e-13 |
| YOL089C_VL3        | FRAMESHIFT  | FULL    | 3.4e-13 |
| YOL089C_YJM789     | START CODON | FULL    | 3.3e-13 |
| YOR162C_FostersB   | FRAMESHIFT  | FULL    | 1.7e-12 |
| YOR162C_FostersO   | FRAMESHIFT  | FULL    | 1.7e-12 |
| YOR162C_Vin13      | FRAMESHIFT  | FULL    | 1.7e-12 |
| YOR162C_VL3        | FRAMESHIFT  | FULL    | 1.7e-12 |
| YOR162C_ZTW1       | FRAMESHIFT  | FULL    | 2.4e-12 |
| YOR172W_AWRI796    | FRAMESHIFT  | FULL    | 8.8e-12 |
| YOR172W_JAY291     | START CODON | FULL    | 8.9e-12 |
| YOR172W_Kyokai7    | START CODON | FULL    | 5.1e-05 |
| YOR172W_LalvinQA23 | FRAMESHIFT  | FULL    | 8.8e-12 |
| YOR337W_AWRI796    | FRAMESHIFT  | FULL    | 3.5e-12 |
| YOR337W_FostersB   | FRAMESHIFT  | FULL    | 3.5e-12 |
| YOR337W_FostersO   | FRAMESHIFT  | FULL    | 3.5e-12 |
| YOR337W_LalvinQA23 | FRAMESHIFT  | FULL    | 3.7e-12 |
| YOR337W_T73        | FRAMESHIFT  | FULL    | 3.5e-12 |
| YOR337W_Vin13      | FRAMESHIFT  | FULL    | 3.6e-12 |
| YOR337W_VL3        | FRAMESHIFT  | FULL    | 3.7e-12 |
| YOR380W_AWRI796    | FRAMESHIFT  | FULL    | 2.2e-12 |
| YOR380W_LalvinQA23 | FRAMESHIFT  | FULL    | 2.2e-12 |
| YOR380W_VL3        | FRAMESHIFT  | FULL    | 2.2e-12 |
| YPL248C_AWRI1631   | FRAMESHIFT  | FULL    | 4.9e-14 |
| YPL248C_FostersB   | FRAMESHIFT  | FULL    | 1.8e-13 |
| YPR196W_AWRI796    | FRAMESHIFT  | FULL    | 5.2e-12 |
| YPR196W_BY4741     | START CODON | FULL    | 6.6e-12 |
| YPR196W_CLIB324    | FRAMESHIFT  | FULL    | 5.4e-12 |
| YPR196W_EC9-8      | FRAMESHIFT  | FULL    | 5.3e-12 |
| YPR196W_FostersB   | FRAMESHIFT  | FULL    | 5.0e-12 |
| YPR196W_FostersO   | FRAMESHIFT  | PARTIAL | 4.2e-11 |
| YPR196W_LalvinQA23 | FRAMESHIFT  | FULL    | 5.3e-12 |

|                 |            |      |         |
|-----------------|------------|------|---------|
| YPR196W_SEY6210 | Unknown    | FULL | 6.6e-12 |
| YPR196W_VL3     | FRAMESHIFT | FULL | 5.3e-12 |
