# Supplementary material for: CeGAL: Redefining a Widespread Fungal-Specific Transcription Factor Family Using an In Silico Error-Tracking Approach
Source: MDPI journal article supplement (doi:10.3390/jof9040424), 2023-03-29
Supplement: s1 [file s1]

Table S5. Swiss-Prot entries for 12 MHD-only proteins, and cross-references to genome and literature databases.

| Swiss-Prot ID | Organism                         | Function                                                   | Swiss-Prot status                         | ENSEMBL<br>gene ID /<br>Genbank ID | PUBMED ID             |
|---------------|----------------------------------|------------------------------------------------------------|-------------------------------------------|------------------------------------|-----------------------|
| S0DS79        | <i>Gibberella fujikuroi</i>      | Equisetin cluster transcription factor                     | Experimental evidence at transcript level | CCT65290                           | 28379186              |
| S4W775        | <i>Fusarium heterosporum</i>     | Equisetin cluster transcription factor                     | Protein predicted                         | KC439347                           | 23614392              |
| B6HMK4        | <i>Penicillium rubens</i>        | Sorbicillinoid biosynthetic cluster transcription factor 2 | Protein predicted                         | CAP95406                           | 28618182              |
| Q5SBL4        | <i>Fusarium heterosporum</i>     | A cluster transcription factor fsdR                        | Protein predicted                         | AY700570                           | 23614392              |
| Q5AR44        | <i>Aspergillus nidulans</i>      | Transcription factor asqA                                  | Protein predicted                         | CBF82261                           | 25251934              |
| D7PI12        | <i>Penicillium aethiopicum</i>   | Probable transcription factor gsfr1                        | Experimental evidence at protein level    | GU574478.1                         | 20534346              |
| O59746        | <i>Schizosaccharomyces pombe</i> | Uncharacterized transcriptional regulatory protein         | Experimental evidence at protein level    | SPBC530.11c                        |                       |
| Q9P7H9        | <i>Schizosaccharomyces pombe</i> | Uncharacterized transcriptional regulatory protein         | Protein inferred from homology            | SPAC105.03c.1                      |                       |
| A0A5C1RF03    | <i>Didymella fabae</i>           | Ascochitine biosynthesis cluster transcriptional regulator | Protein inferred from homology            | MN052632.1                         | 31554725              |
| D7UQ41        | <i>Alternaria solani</i>         | Probable transcription factor sol4                         | Protein predicted                         | AB514562                           | 20486243              |
| B8NJG5        | <i>Aspergillus flavus</i>        | Probable transcription factor lepB                         | Protein predicted                         | EED49864                           | 20447271,<br>26051490 |
| A6SSW6        | <i>Botryotinia fuckeliana</i>    | Transcription factor BOA15                                 | Protein predicted                         | FR718884                           | 21722295              |
