# Supplementary material for: CeGAL: Redefining a Widespread Fungal-Specific Transcription Factor Family Using an In Silico Error-Tracking Approach
Source: MDPI journal article supplement (doi:10.3390/jof9040424), 2023-03-29
Supplement: s1 [file s1]

*Table S4. Frequency of MHD domain pairs in the UniProtKB Swiss-Prot and TrEMBL sections.*

*The numbers in brackets indicate the proportion of each domain pair with respect to the total number of MHD sequences.*

|           | Swiss-Prot  | TrEMBL        | Total         |
|-----------|-------------|---------------|---------------|
| Zn2C6-MHD | 152 (89.4%) | 80304 (63.4%) | 80456 (63.4%) |
| C2H2-MHD  | 6 (3.5%)    | 6308 (5.0%)   | 6314 (5.0%)   |
| MHD-only  | 12 (7.1%)   | 37634 (29.7%) | 37646 (29.7%) |
| Other     | 0 (0%)      | 2445 (1.9%)   | 2445 (1.9%)   |
| Total     | 170         | 126691        | 126861        |
