# Supplementary material for: CeGAL: Redefining a Widespread Fungal-Specific Transcription Factor Family Using an In Silico Error-Tracking Approach
Source: MDPI journal article supplement (doi:10.3390/jof9040424), 2023-03-29
Supplement: s1 [file s1]

*Table S1. List of the 44 Zn2C6-MHD containing genes coded by the Saccharomyces cerevisiae S288C genome.*

| <b>UniprotKB ID</b> | <b>Gene ID</b> | <b>SGD ID</b> |
|---------------------|----------------|---------------|
| Q04052              | ARO80          | YDR421W       |
| P40467              | ASG1           | YIL130W       |
| P39113              | CAT8           | YMR280C       |
| P40969              | CEP3           | YMR168C       |
| P43634              | CHA4           | YLR098C       |
| P21657              | DAL81          | YIR023W       |
| P38073              | EDS1           | YBR033W       |
| P04386              | GAL4           | YPL248C       |
| Q12180              | HAL9           | YOL089C       |
| P0CE41              | HAP1           | YLR256W       |
| P08638              | LEU3           | YLR451W       |
| P53338              | MAL13          | YGR288W       |
| P38157              | MAL33          | YBR297W       |
| P39720              | OAF1           | YAL051W       |
| P36023              | OAF3           | YKR064W       |
| P12383              | PDR1           | YGL013C       |
| P33200              | PDR3           | YBL005W       |
| Q06149              | PDR8           | YLR266C       |
| P52960              | PIP2           | YOR363C       |
| P07272              | PPR1           | YLR014C       |
| P53749              | PUL4           | YNR063W       |
| P25502              | PUT3           | YKL015W       |
| Q08904              | RDR1           | YOR380W       |
| P25611              | RDS1           | YCR106W       |
| P32862              | RGT1           | YKL038W       |
| Q06639              | RSC3           | YDR303C       |
| P38781              | RSC30          | YHR056C       |
| P34228              | SEF1           | YBL066C       |
| P46954              | SIP4           | YJL089W       |
| P50104              | STB4           | YMR019W       |
| P38699              | STB5           | YHR178W       |
| P38114              | TBS1           | YBR150C       |
| P47988              | TEA1           | YOR337W       |
| P39961              | TOG1           | YER184C       |
| Q04411              | URC2           | YDR520C       |

|        |       |         |
|--------|-------|---------|
| Q03631 | WAR1  | YML076C |
| Q12340 | YRM1  | YOR172W |
| Q12172 | YRR1  | YOR162C |
| P43551 | ZNF1  | YFL052W |
| P35995 | YKW2  | YKL222C |
| P39529 | YJU6  | YJL206C |
| Q05854 | YL278 | YLR278C |
| Q06595 | YP196 | YPR196W |
| Q12244 | YL054 | YLL054C |
