# Supplementary material for: CeGAL: Redefining a Widespread Fungal-Specific Transcription Factor Family Using an In Silico Error-Tracking Approach
Source: MDPI journal article supplement (doi:10.3390/jof9040424), 2023-03-29
Supplement: s1 [file s1]

*Table S6. Number of MHD-containing sequences with different domain combinations in public databases: Swiss-Prot and TrEMBL (sequences mapped to ENSEMBL only) and number of DBD identified by our error identification protocol.*

|           | Swiss-Prot    |                            |                  |
|-----------|---------------|----------------------------|------------------|
|           | Database      | DBD identified by protocol | After correction |
| Zn2C6-MHD | 152 (89.4%)   | 7 (58.3%)                  | 159 (93.5%)      |
| C2H2-MHD  | 6 (3.5%)      | 1 (8.3%)                   | 7 (4.1%)         |
| MHD-only  | 12 (7.1%)     | 4 (33.3%)                  | 4 (2.4%)         |
|           | TrEMBL        |                            |                  |
|           | Database      | DBD identified by protocol | After correction |
| Zn2C6-MHD | 36875 (65.4%) | 13734 (81.9%)              | 50609 (89.7%)    |
| C2H2-MHD  | 2763 (4.9%)   | 748 (4.5%)                 | 3511 (6.2%)      |
| MHD-only  | 16760 (29.7%) | 2278 (13.6%)               | 2278 (4.0%)      |
