# Supplementary material for: CeGAL: Redefining a Widespread Fungal-Specific Transcription Factor Family Using an In Silico Error-Tracking Approach
Source: MDPI journal article supplement (doi:10.3390/jof9040424), 2023-03-29
Supplement: s1 [file s1]

Table S2. List of the 47 genomes of *Saccharomyces cerevisiae* strains extracted from the SGD.

| Strain                   | No. of scaffolds | No. of ORFs | Description                                                            |
|--------------------------|------------------|-------------|------------------------------------------------------------------------|
| <b>AWRI1631</b>          | <b>2484</b>      | 4747        | Haploid derivative of South African commercial wine strain N96         |
| <b>AWRI796</b>           | <b>105</b>       | 4747        | South African red wine strain                                          |
| <b>BC187</b>             | <b>614</b>       | 5254        | Derivative of California wine barrel isolate                           |
| <b>BY4741 (Stanford)</b> | <b>864</b>       | 6682        | S288C-derivative laboratory strain                                     |
| <b>BY4742 (Stanford)</b> | <b>868</b>       | 5391        | S288C-derivative laboratory strain                                     |
| <b>CBS7960</b>           | <b>2367</b>      | 5333        | Brazilian bioethanol factory isolate                                   |
| <b>CEN.PK113-7D</b>      | <b>589</b>       | 6269        | Lab strain constructed by Michael Ciriacy and K.D. Entian              |
| <b>CLIB215</b>           | <b>1566</b>      | 5051        | New Zealand bakery isolate                                             |
| <b>CLIB324</b>           | <b>3528</b>      | 3733        | Vietnamese bakery isolate                                              |
| <b>D273-10B</b>          | <b>203</b>       | 5367        | Lab strain for mitochondrial studies constructed in the Sherman lab    |
| <b>DBVPG6044</b>         | <b>624</b>       | 5297        | West African isolate                                                   |
| <b>EC1118</b>            | <b>31</b>        | 6352        | Commercial wine strain                                                 |
| <b>EC9-8</b>             | <b>1088</b>      | 5490        | Haploid derivative of Israeli canyon isolate                           |
| <b>FL100 (SGD)</b>       | <b>174</b>       | 5364        | lab strain constructed by Francis Lacroute                             |
| <b>FostersB</b>          | <b>142</b>       | 6240        | Commercial ale strain                                                  |
| <b>FostersO</b>          | <b>222</b>       | 6239        | Commercial ale strain                                                  |
| <b>FY1679</b>            | <b>388</b>       | 5370        | S288C-derivative laboratory strain                                     |
| <b>JAY291</b>            | <b>453</b>       | 6143        | Haploid derivative of Brazilian industrial bioethanol strain PE-2      |
| <b>JK9-3d</b>            | <b>197</b>       | 5358        | Lab strain constructed by J. Kunz and J. Heitman while in the Hall lab |
| <b>K11</b>               | <b>480</b>       | 5267        | Sake strain                                                            |
| <b>Kyokai7</b>           | <b>705</b>       | 6285        | Japanese sake yeast                                                    |
| <b>L1528</b>             | <b>538</b>       | 5361        | Chilean wine strain                                                    |
| <b>LalvinQA23</b>        | <b>185</b>       | 6293        | Portuguese Vinho Verde white wine strain                               |
| <b>M22</b>               | <b>6145</b>      | 2548        | Italian vineyard isolate                                               |
| <b>PW5</b>               | <b>1608</b>      | 5523        | Nigerian Raphia palm wine isolate                                      |
| <b>RedStar</b>           | <b>577</b>       | 5440        | Commercial baking strain                                               |
| <b>RM11-1A (SGD)</b>     | <b>115</b>       | 5310        | Natural isolate collected by Robert Mortimer from a Calif vineyard     |

|                                  |             |      |                                                                        |
|----------------------------------|-------------|------|------------------------------------------------------------------------|
| <b>S288C</b>                     | <b>17</b>   | 6716 | Reference Genome                                                       |
| <b>SEY6210</b>                   | <b>183</b>  | 5383 | Lab strain synonymous with SEY6211, Mata haploid, diploid SEY6210.1    |
| <b>Sigma1278b-10560-6B (SGD)</b> | <b>214</b>  | 5343 | Used to study pseudohyphal growth isolated in Grenson lab in 1960s     |
| <b>SK1</b>                       | <b>106</b>  | 5960 | High sporulating diploid lab strain used to study sporulation, meiosis |
| <b>T7</b>                        | <b>360</b>  | 6293 | Missouri oak tree exudate isolate                                      |
| <b>T73</b>                       | <b>5882</b> | 3324 | Spanish red wine strain                                                |
| <b>UC5</b>                       | <b>1527</b> | 5599 | Japanese sake yeast                                                    |
| <b>UWOPS05-217-3</b>             | <b>1348</b> | 4788 | Environmental isolate                                                  |
| <b>Vin13</b>                     | <b>158</b>  | 6321 | South African white wine strain                                        |
| <b>VL3</b>                       | <b>125</b>  | 6322 | French white wine strain                                               |
| <b>W303 (SGD)</b>                | <b>236</b>  | 5357 | Lab strain constructed by Rodney Rothstein                             |
| <b>X2180-1A</b>                  | <b>212</b>  | 5370 | Lab strain constructed from Robert Mortimer                            |
| <b>Y10</b>                       | <b>4118</b> | 2656 | Philippine coconut isolate                                             |
| <b>Y55</b>                       | <b>198</b>  | 5330 | Lab strain originally isolated from wine grapes in France by O. Winge  |
| <b>YJM269</b>                    | <b>1179</b> | 5396 | Austrian Blauer Portugieser wine grape isolate                         |
| <b>YJM339</b>                    | <b>554</b>  | 5317 | Clinical isolate                                                       |
| <b>YJM789</b>                    | <b>258</b>  | 6378 | Haploid derivative of opportunistic human pathogen                     |
| <b>YPS128</b>                    | <b>670</b>  | 5241 | Pennsylvania woodland isolate                                          |
| <b>YPS163 (Stanford)</b>         | <b>607</b>  | 5263 | Pennsylvania woodland isolate                                          |
| <b>YS9</b>                       | <b>851</b>  | 5271 | Singapore baking strain                                                |
| <b>ZTW1</b>                      | <b>33</b>   | 6306 | Chinese corn mash bioethanol isolate                                   |
