# Supplementary material for: CeGAL: Redefining a Widespread Fungal-Specific Transcription Factor Family Using an In Silico Error-Tracking Approach
Source: MDPI journal article supplement (doi:10.3390/jof9040424), 2023-03-29
Supplement: s1 [file s1]

*Table S7. Comparison of MHD-containing sequences from Ascomycota and Basidiomycota. Number of MHD-containing sequences with different domain combinations in public databases: Uniprot (sequences mapped to ENSEMBL only) and number of DBD identified by our error identification protocol.*

| Ascomycota    |               |                            |                  |
|---------------|---------------|----------------------------|------------------|
|               | Uniprot       | DBD identified by protocol | After correction |
| Zn2C6-MHD     | 32324 (66.8%) | 11221 (84.1%)              | 43545 (90.0%)    |
| C2H2-MHD      | 2715 (5.6%)   | 638 (4.8%)                 | 3353 (6.9%)      |
| MHD-only      | 13338 (27.6%) | 1479 (11.1%)               | 1479 (3.1%)      |
| Basidiomycota |               |                            |                  |
|               | Uniprot       | DBD identified by protocol | After correction |
| Zn2C6-MHD     | 3249 (72.8%)  | 859 (77.9%)                | 4108 (92.1%)     |
| C2H2-MHD      | 111 (2.5%)    | 14 (1.3%)                  | 1125 (2.8%)      |
| MHD-only      | 1102 (24.7%)  | 229 (20.8%)                | 229 (5.1%)       |
