# Supplementary material for: CeGAL: Redefining a Widespread Fungal-Specific Transcription Factor Family Using an In Silico Error-Tracking Approach
Source: J Fungi (Basel). 2023 Mar 29;9(4):424. doi: 10.3390/jof9040424 (PMC10141177; doi:10.3390/jof9040424)
Supplement: Supplementary file 1 [file jof-09-00424-s001.zip › Supplementary Data.xlsx]

## Sheet: C6
Query_uniprot	Query_ensembl	Neighbor	HMM score	Isoform exists with C6	Corrected DBD sequence	Description	Organism	Animal or Plant Pathogenic Status	Taxonomy
A0A1E4T4A3_9ASCO	CANARDRAFT_181658	W1QFK8	5.3e-14	no	RLPISCESCRKKKMKCDKQKPCSGCIKNKTEDSCKYAQHSSETASK	Fungal_trans domain-containing protein	[Candida] arabinofermentans NRRL YB-2248	Non-Pathogen	[Candida] arabinofermentans (species), Ogataea/Candida clade (no rank), Ogataea (genus), Pichiaceae (family), Saccharomycetales (order), Saccharomycetes (class), Saccharomycotina (subphylum), saccharomyceta (no rank), Ascomycota (phylum), Dikarya (subkingdom), Fungi (kingdom), Opisthokonta (no rank), Eukaryota (superkingdom), cellular organisms (no rank)
A0A1E4SW65_9ASCO	CANARDRAFT_202449	W1Q845	1.9e-14	no	RIPYSCICCRSRKVKCDRTKPVCNRCSKASLSCRYDGPSVWAQSD	Fungal_trans domain-containing protein	[Candida] arabinofermentans NRRL YB-2248	Non-Pathogen	[Candida] arabinofermentans (species), Ogataea/Candida clade (no rank), Ogataea (genus), Pichiaceae (family), Saccharomycetales (order), Saccharomycetes (class), Saccharomycotina (subphylum), saccharomyceta (no rank), Ascomycota (phylum), Dikarya (subkingdom), Fungi (kingdom), Opisthokonta (no rank), Eukaryota (superkingdom), cellular organisms (no rank)
A0A1E4T820_9ASCO	CANARDRAFT_26086	A0A1E3Q7T6	9.8e-10	no	RRAYKACERCRKLHKKCEYLHNDESLCILCRDTNSICQRSNSIG	Fungal_trans domain-containing protein	[Candida] arabinofermentans NRRL YB-2248	Non-Pathogen	[Candida] arabinofermentans (species), Ogataea/Candida clade (no rank), Ogataea (genus), Pichiaceae (family), Saccharomycetales (order), Saccharomycetes (class), Saccharomycotina (subphylum), saccharomyceta (no rank), Ascomycota (phylum), Dikarya (subkingdom), Fungi (kingdom), Opisthokonta (no rank), Eukaryota (superkingdom), cellular organisms (no rank)
A0A1E4SZ73_9ASCO	CANARDRAFT_28955	W1QEJ5	1.4e-13	no	DFIKSCSYCKLKKVKCSGEVPTCSRCSKSNVVCNIVEGVGYTYKT	Fungal_trans domain-containing protein	[Candida] arabinofermentans NRRL YB-2248	Non-Pathogen	[Candida] arabinofermentans (species), Ogataea/Candida clade (no rank), Ogataea (genus), Pichiaceae (family), Saccharomycetales (order), Saccharomycetes (class), Saccharomycotina (subphylum), saccharomyceta (no rank), Ascomycota (phylum), Dikarya (subkingdom), Fungi (kingdom), Opisthokonta (no rank), Eukaryota (superkingdom), cellular organisms (no rank)
A0A1E4T5D4_9ASCO	CANARDRAFT_6521	A0A1E4SZS8	4.4e-07	no	SCHLCEERKIACKFRKGEAECTDCQKSGMCKTIEPQPQQ	Fungal_trans domain-containing protein	[Candida] arabinofermentans NRRL YB-2248	Non-Pathogen	[Candida] arabinofermentans (species), Ogataea/Candida clade (no rank), Ogataea (genus), Pichiaceae (family), Saccharomycetales (order), Saccharomycetes (class), Saccharomycotina (subphylum), saccharomyceta (no rank), Ascomycota (phylum), Dikarya (subkingdom), Fungi (kingdom), Opisthokonta (no rank), Eukaryota (superkingdom), cellular organisms (no rank)
A0A1L0BQM3_9ASCO	SAMEA4029009_CIC11G00000000577	Q6BWU2	7.5e-12	no	KRTKPCSNCKRSKVKCEYTDKLPCMRCVNSGQASTCQIMPKLPSLKLP	CIC11C00000000577	[Candida] intermedia	Non-Pathogen	Candida/Metschnikowiaceae (genus), Metschnikowiaceae incertae sedis (no rank), Metschnikowiaceae (family), CUG-Ser1 clade (no rank), Saccharomycetales (order), Saccharomycetes (class), Saccharomycotina (subphylum), saccharomyceta (no rank), Ascomycota (phylum), Dikarya (subkingdom), Fungi (kingdom), Opisthokonta (no rank), Eukaryota (superkingdom), cellular organisms (no rank)
A0A1L0BW80_9ASCO	SAMEA4029009_CIC11G00000000656	A5DBI2	1e-12	no	TVILvCIHCRVKKKKCDGNEVCGNCQKAGIKCERSVRDRRSIRP	CIC11C00000000656	[Candida] intermedia	Non-Pathogen	Candida/Metschnikowiaceae (genus), Metschnikowiaceae incertae sedis (no rank), Metschnikowiaceae (family), CUG-Ser1 clade (no rank), Saccharomycetales (order), Saccharomycetes (class), Saccharomycotina (subphylum), saccharomyceta (no rank), Ascomycota (phylum), Dikarya (subkingdom), Fungi (kingdom), Opisthokonta (no rank), Eukaryota (superkingdom), cellular organisms (no rank)
A0A1L0DP00_9ASCO	SAMEA4029009_CIC11G00000000743	A0A1L0BQJ5	9.4e-12	no	KKASFSCDRCKVRKIACQRPNPSSPCAGCVKANYECSTTIKRKKKIR	CIC11C00000000743	[Candida] intermedia	Non-Pathogen	Candida/Metschnikowiaceae (genus), Metschnikowiaceae incertae sedis (no rank), Metschnikowiaceae (family), CUG-Ser1 clade (no rank), Saccharomycetales (order), Saccharomycetes (class), Saccharomycotina (subphylum), saccharomyceta (no rank), Ascomycota (phylum), Dikarya (subkingdom), Fungi (kingdom), Opisthokonta (no rank), Eukaryota (superkingdom), cellular organisms (no rank)
A0A1L0C4S9_9ASCO	SAMEA4029009_CIC11G00000001200	A0A1L0DKW6	3.3e-14	no	HRIPASCLQCRKRKVRCDRRMPCLSCIKHKTLDNCDYSTEVIASTPN	CIC11C00000001200	[Candida] intermedia	Non-Pathogen	Candida/Metschnikowiaceae (genus), Metschnikowiaceae incertae sedis (no rank), Metschnikowiaceae (family), CUG-Ser1 clade (no rank), Saccharomycetales (order), Saccharomycetes (class), Saccharomycotina (subphylum), saccharomyceta (no rank), Ascomycota (phylum), Dikarya (subkingdom), Fungi (kingdom), Opisthokonta (no rank), Eukaryota (superkingdom), cellular organisms (no rank)
A0A1L0BEI4_9ASCO	SAMEA4029009_CIC11G00000002729	A0A017SST3	5.2e-08	no	ACLRCRTLKRKCEITGQSVCDRCAR	CIC11C00000002729	[Candida] intermedia	Non-Pathogen	Candida/Metschnikowiaceae (genus), Metschnikowiaceae incertae sedis (no rank), Metschnikowiaceae (family), CUG-Ser1 clade (no rank), Saccharomycetales (order), Saccharomycetes (class), Saccharomycotina (subphylum), saccharomyceta (no rank), Ascomycota (phylum), Dikarya (subkingdom), Fungi (kingdom), Opisthokonta (no rank), Eukaryota (superkingdom), cellular organisms (no rank)
A0A1L0GGM8_9ASCO	SAMEA4029009_CIC11G00000002886	A0A1L0GGW6	1.1e-13	no	KRTSRACIRCRFRHTRCPGGQPCSKCMLAKTKCEYVEFEKRLVV	CIC11C00000002886	[Candida] intermedia	Non-Pathogen	Candida/Metschnikowiaceae (genus), Metschnikowiaceae incertae sedis (no rank), Metschnikowiaceae (family), CUG-Ser1 clade (no rank), Saccharomycetales (order), Saccharomycetes (class), Saccharomycotina (subphylum), saccharomyceta (no rank), Ascomycota (phylum), Dikarya (subkingdom), Fungi (kingdom), Opisthokonta (no rank), Eukaryota (superkingdom), cellular organisms (no rank)
A0A1L0DS62_9ASCO	SAMEA4029009_CIC11G00000002974	A0A0L0P2U5	2e-13	no	RTLLLCLQCRKRKVRCDRRMPCLSCIKHKTLDNCDYSTEVIASTP	CIC11C00000002974	[Candida] intermedia	Non-Pathogen	Candida/Metschnikowiaceae (genus), Metschnikowiaceae incertae sedis (no rank), Metschnikowiaceae (family), CUG-Ser1 clade (no rank), Saccharomycetales (order), Saccharomycetes (class), Saccharomycotina (subphylum), saccharomyceta (no rank), Ascomycota (phylum), Dikarya (subkingdom), Fungi (kingdom), Opisthokonta (no rank), Eukaryota (superkingdom), cellular organisms (no rank)
A0A1L0BEW6_9ASCO	SAMEA4029009_CIC11G00000003617	A0A1L0CTT3	4.1e-17	no	RSIAACRRCRVKKIKCDQEFPKCTRCAKAGLECVSVDPSTGREVA	CIC11C00000003617	[Candida] intermedia	Non-Pathogen	Candida/Metschnikowiaceae (genus), Metschnikowiaceae incertae sedis (no rank), Metschnikowiaceae (family), CUG-Ser1 clade (no rank), Saccharomycetales (order), Saccharomycetes (class), Saccharomycotina (subphylum), saccharomyceta (no rank), Ascomycota (phylum), Dikarya (subkingdom), Fungi (kingdom), Opisthokonta (no rank), Eukaryota (superkingdom), cellular organisms (no rank)
A0A1L0C159_9ASCO	SAMEA4029009_CIC11G00000003629	C4XX69	1.3e-17	no	RLRPVVVCTHCRKRKIKCDKQLPCSNCVKVNLGDSCTYDSQLDRK	CIC11C00000003629	[Candida] intermedia	Non-Pathogen	Candida/Metschnikowiaceae (genus), Metschnikowiaceae incertae sedis (no rank), Metschnikowiaceae (family), CUG-Ser1 clade (no rank), Saccharomycetales (order), Saccharomycetes (class), Saccharomycotina (subphylum), saccharomyceta (no rank), Ascomycota (phylum), Dikarya (subkingdom), Fungi (kingdom), Opisthokonta (no rank), Eukaryota (superkingdom), cellular organisms (no rank)
A0A1L0DBF2_9ASCO	SAMEA4029009_CIC11G00000004753	A0A1L0D0Y6	1.8e-13	no	KASLACANCRKRKIKCILGNSLPCAHCKKLDLNCVLLSTDKRKDRY	CIC11C00000004753	[Candida] intermedia	Non-Pathogen	Candida/Metschnikowiaceae (genus), Metschnikowiaceae incertae sedis (no rank), Metschnikowiaceae (family), CUG-Ser1 clade (no rank), Saccharomycetales (order), Saccharomycetes (class), Saccharomycotina (subphylum), saccharomyceta (no rank), Ascomycota (phylum), Dikarya (subkingdom), Fungi (kingdom), Opisthokonta (no rank), Eukaryota (superkingdom), cellular organisms (no rank)
A0A1L0GSM3_9ASCO	SAMEA4029009_CIC11G00000005515	G3B4A6	2.1e-10	no	NRSLIACSACRSSKVRCTRTSSSSSCKRCSDLALPCHFEMKLSQRSG	CIC11C00000005515	[Candida] intermedia	Non-Pathogen	Candida/Metschnikowiaceae (genus), Metschnikowiaceae incertae sedis (no rank), Metschnikowiaceae (family), CUG-Ser1 clade (no rank), Saccharomycetales (order), Saccharomycetes (class), Saccharomycotina (subphylum), saccharomyceta (no rank), Ascomycota (phylum), Dikarya (subkingdom), Fungi (kingdom), Opisthokonta (no rank), Eukaryota (superkingdom), cellular organisms (no rank)
A0A1L0DIV0_9ASCO	SAMEA4029009_CIC11G00000005686	Q6BJV0	2.2e-11	no	RPTIVCQRCRVKKSKCDKAQPCLNCVKAKCPETCVYES	CIC11C00000005686	[Candida] intermedia	Non-Pathogen	Candida/Metschnikowiaceae (genus), Metschnikowiaceae incertae sedis (no rank), Metschnikowiaceae (family), CUG-Ser1 clade (no rank), Saccharomycetales (order), Saccharomycetes (class), Saccharomycotina (subphylum), saccharomyceta (no rank), Ascomycota (phylum), Dikarya (subkingdom), Fungi (kingdom), Opisthokonta (no rank), Eukaryota (superkingdom), cellular organisms (no rank)
A0A1L0DQM8_9ASCO	SAMEA4029010_CIC11G00000000952	A5DBI2	1e-12	no	TVILvCIHCRVKKKKCDGNEVCGNCQKAGIKCERSVRDRRSIRP	CIC11C00000000952	[Candida] intermedia	Non-Pathogen	Candida/Metschnikowiaceae (genus), Metschnikowiaceae incertae sedis (no rank), Metschnikowiaceae (family), CUG-Ser1 clade (no rank), Saccharomycetales (order), Saccharomycetes (class), Saccharomycotina (subphylum), saccharomyceta (no rank), Ascomycota (phylum), Dikarya (subkingdom), Fungi (kingdom), Opisthokonta (no rank), Eukaryota (superkingdom), cellular organisms (no rank)
A0A1L0D953_9ASCO	SAMEA4029010_CIC11G00000001494	A0A0L0P2U5	2e-13	no	RTLLLCLQCRKRKVRCDRRMPCLSCIKHKTLDNCDYSTEVIASTP	CIC11C00000001494	[Candida] intermedia	Non-Pathogen	Candida/Metschnikowiaceae (genus), Metschnikowiaceae incertae sedis (no rank), Metschnikowiaceae (family), CUG-Ser1 clade (no rank), Saccharomycetales (order), Saccharomycetes (class), Saccharomycotina (subphylum), saccharomyceta (no rank), Ascomycota (phylum), Dikarya (subkingdom), Fungi (kingdom), Opisthokonta (no rank), Eukaryota (superkingdom), cellular organisms (no rank)
A0A1L0E0M8_9ASCO	SAMEA4029010_CIC11G00000002972	G3B4A6	2.1e-10	no	NRSLIACSACRSSKVRCTRTSSSSSCKRCSDLALPCHFEMKLSQRSG	CIC11C00000002972	[Candida] intermedia	Non-Pathogen	Candida/Metschnikowiaceae (genus), Metschnikowiaceae incertae sedis (no rank), Metschnikowiaceae (family), CUG-Ser1 clade (no rank), Saccharomycetales (order), Saccharomycetes (class), Saccharomycotina (subphylum), saccharomyceta (no rank), Ascomycota (phylum), Dikarya (subkingdom), Fungi (kingdom), Opisthokonta (no rank), Eukaryota (superkingdom), cellular organisms (no rank)
A0A1L0B800_9ASCO	SAMEA4029010_CIC11G00000003745	A0A017SST3	5.2e-08	no	ACLRCRTLKRKCEITGQSVCDRCAR	CIC11C00000003745	[Candida] intermedia	Non-Pathogen	Candida/Metschnikowiaceae (genus), Metschnikowiaceae incertae sedis (no rank), Metschnikowiaceae (family), CUG-Ser1 clade (no rank), Saccharomycetales (order), Saccharomycetes (class), Saccharomycotina (subphylum), saccharomyceta (no rank), Ascomycota (phylum), Dikarya (subkingdom), Fungi (kingdom), Opisthokonta (no rank), Eukaryota (superkingdom), cellular organisms (no rank)
A0A1L0DBG8_9ASCO	SAMEA4029010_CIC11G00000004651	A0A1L0BT18	1.2e-13	no	DKNYACKECQRRRVRCSRELPICSACATSNRHCLYESQLKSRLTR	CIC11C00000004651	[Candida] intermedia	Non-Pathogen	Candida/Metschnikowiaceae (genus), Metschnikowiaceae incertae sedis (no rank), Metschnikowiaceae (family), CUG-Ser1 clade (no rank), Saccharomycetales (order), Saccharomycetes (class), Saccharomycotina (subphylum), saccharomyceta (no rank), Ascomycota (phylum), Dikarya (subkingdom), Fungi (kingdom), Opisthokonta (no rank), Eukaryota (superkingdom), cellular organisms (no rank)
A0A1L0DK59_9ASCO	SAMEA4029010_CIC11G00000004702	Q6BJV0	7.5e-14	no	RRVVVCTNCHQRKRKCNRSDPCSSCIRGGLEKSCRYQSSPSELTH	CIC11C00000004702	[Candida] intermedia	Non-Pathogen	Candida/Metschnikowiaceae (genus), Metschnikowiaceae incertae sedis (no rank), Metschnikowiaceae (family), CUG-Ser1 clade (no rank), Saccharomycetales (order), Saccharomycetes (class), Saccharomycotina (subphylum), saccharomyceta (no rank), Ascomycota (phylum), Dikarya (subkingdom), Fungi (kingdom), Opisthokonta (no rank), Eukaryota (superkingdom), cellular organisms (no rank)
A0A1L0D4G9_9ASCO	SAMEA4029010_CIC11G00000005562	Q6BWU2	7.5e-12	no	KRTKPCSNCKRSKVKCEYTDKLPCMRCVNSGQASTCQIMPKLPSLKLP	CIC11C00000005562	[Candida] intermedia	Non-Pathogen	Candida/Metschnikowiaceae (genus), Metschnikowiaceae incertae sedis (no rank), Metschnikowiaceae (family), CUG-Ser1 clade (no rank), Saccharomycetales (order), Saccharomycetes (class), Saccharomycotina (subphylum), saccharomyceta (no rank), Ascomycota (phylum), Dikarya (subkingdom), Fungi (kingdom), Opisthokonta (no rank), Eukaryota (superkingdom), cellular organisms (no rank)
A0A0A1SJP2_9HYPO	VHEMI00604	A0A0A1T2E5	1.1e-14	yes	RTRRACDKCSSSRTRCDGEfPCRRCAeYGYACHYNREVKKRGRL	Putative Transcriptional activator xlnR	[Torrubiella] hemipterigena	Pathogen	'Torrubiella' clade (no rank), Clavicipitaceae incertae sedis (no rank), Clavicipitaceae (family), Hypocreales (order), Hypocreomycetidae (subclass), Sordariomycetes (class), sordariomyceta (no rank), leotiomyceta (no rank), Pezizomycotina (subphylum), saccharomyceta (no rank), Ascomycota (phylum), Dikarya (subkingdom), Fungi (kingdom), Opisthokonta (no rank), Eukaryota (superkingdom), cellular o…
A0A0A1T4C5_9HYPO	VHEMI01120	A0A0A1T6H4	9.8e-13	yes	NRVLLSCAPCRNSKLKCDRGDPCSQCEKKQRPDACVYAPKPIKKKP	Fungal_trans domain-containing protein	[Torrubiella] hemipterigena	Pathogen	'Torrubiella' clade (no rank), Clavicipitaceae incertae sedis (no rank), Clavicipitaceae (family), Hypocreales (order), Hypocreomycetidae (subclass), Sordariomycetes (class), sordariomyceta (no rank), leotiomyceta (no rank), Pezizomycotina (subphylum), saccharomyceta (no rank), Ascomycota (phylum), Dikarya (subkingdom), Fungi (kingdom), Opisthokonta (no rank), Eukaryota (superkingdom), cellular o…
A0A0A1T4N4_9HYPO	VHEMI01206	A0A0A1T6T5	3.4e-14	yes	RSRIgCATCRARKVKCDERADTCGNCEKLSLPCIRSGDGTPETFL	Fungal_trans domain-containing protein	[Torrubiella] hemipterigena	Pathogen	'Torrubiella' clade (no rank), Clavicipitaceae incertae sedis (no rank), Clavicipitaceae (family), Hypocreales (order), Hypocreomycetidae (subclass), Sordariomycetes (class), sordariomyceta (no rank), leotiomyceta (no rank), Pezizomycotina (subphylum), saccharomyceta (no rank), Ascomycota (phylum), Dikarya (subkingdom), Fungi (kingdom), Opisthokonta (no rank), Eukaryota (superkingdom), cellular o…
A0A0A1T7Y4_9HYPO	VHEMI01601	A0A0D2AZP7	4.1e-11	no	QRSQKKSCERCIKRKTKCDRQLPCSTCKRAAVGSEDAI	Fungal_trans domain-containing protein	[Torrubiella] hemipterigena	Pathogen	'Torrubiella' clade (no rank), Clavicipitaceae incertae sedis (no rank), Clavicipitaceae (family), Hypocreales (order), Hypocreomycetidae (subclass), Sordariomycetes (class), sordariomyceta (no rank), leotiomyceta (no rank), Pezizomycotina (subphylum), saccharomyceta (no rank), Ascomycota (phylum), Dikarya (subkingdom), Fungi (kingdom), Opisthokonta (no rank), Eukaryota (superkingdom), cellular o…
A0A0A1T6X1_9HYPO	VHEMI02004	B8M1T7	1.4e-12	no	KRVAAACDTCRRRKEKCDGKLPCKHCIVRFVTQTCAYSPGCPA	Fungal_trans domain-containing protein	[Torrubiella] hemipterigena	Pathogen	'Torrubiella' clade (no rank), Clavicipitaceae incertae sedis (no rank), Clavicipitaceae (family), Hypocreales (order), Hypocreomycetidae (subclass), Sordariomycetes (class), sordariomyceta (no rank), leotiomyceta (no rank), Pezizomycotina (subphylum), saccharomyceta (no rank), Ascomycota (phylum), Dikarya (subkingdom), Fungi (kingdom), Opisthokonta (no rank), Eukaryota (superkingdom), cellular o…
A0A0A1TFM2_9HYPO	VHEMI04146	A0A0A1SUK9	1.2e-11	yes	KRVVTSCIACYASKQKCDRRQPCGNCKRRRRPERCVYEQPAATAQI	Fungal_trans domain-containing protein	[Torrubiella] hemipterigena	Pathogen	'Torrubiella' clade (no rank), Clavicipitaceae incertae sedis (no rank), Clavicipitaceae (family), Hypocreales (order), Hypocreomycetidae (subclass), Sordariomycetes (class), sordariomyceta (no rank), leotiomyceta (no rank), Pezizomycotina (subphylum), saccharomyceta (no rank), Ascomycota (phylum), Dikarya (subkingdom), Fungi (kingdom), Opisthokonta (no rank), Eukaryota (superkingdom), cellular o…
A0A0A1TD99_9HYPO	VHEMI04246	A0A0L0MZU6	3.3e-13	no	AKPANVCIACRSRKKKCDGARPACEACVRRGDMCLY	Fungal_trans domain-containing protein	[Torrubiella] hemipterigena	Pathogen	'Torrubiella' clade (no rank), Clavicipitaceae incertae sedis (no rank), Clavicipitaceae (family), Hypocreales (order), Hypocreomycetidae (subclass), Sordariomycetes (class), sordariomyceta (no rank), leotiomyceta (no rank), Pezizomycotina (subphylum), saccharomyceta (no rank), Ascomycota (phylum), Dikarya (subkingdom), Fungi (kingdom), Opisthokonta (no rank), Eukaryota (superkingdom), cellular o…
A0A0A1SUW8_9HYPO	VHEMI04292	A0A0A1TDE0	3.8e-11	yes	KNTACQRCRNDKTRCEALPDDPSCARCRMNSFPDCSSP	Fungal_trans domain-containing protein	[Torrubiella] hemipterigena	Pathogen	'Torrubiella' clade (no rank), Clavicipitaceae incertae sedis (no rank), Clavicipitaceae (family), Hypocreales (order), Hypocreomycetidae (subclass), Sordariomycetes (class), sordariomyceta (no rank), leotiomyceta (no rank), Pezizomycotina (subphylum), saccharomyceta (no rank), Ascomycota (phylum), Dikarya (subkingdom), Fungi (kingdom), Opisthokonta (no rank), Eukaryota (superkingdom), cellular o…
A0A0A1TE51_9HYPO	VHEMI04396	A0A0A1TG62	9.4e-14	yes	KVSSACQRCRQRKLGCDRQRPCQLCIRAGAECIPRHESGSEPGS	Fungal_trans domain-containing protein	[Torrubiella] hemipterigena	Pathogen	'Torrubiella' clade (no rank), Clavicipitaceae incertae sedis (no rank), Clavicipitaceae (family), Hypocreales (order), Hypocreomycetidae (subclass), Sordariomycetes (class), sordariomyceta (no rank), leotiomyceta (no rank), Pezizomycotina (subphylum), saccharomyceta (no rank), Ascomycota (phylum), Dikarya (subkingdom), Fungi (kingdom), Opisthokonta (no rank), Eukaryota (superkingdom), cellular o…
A0A0A1T183_9HYPO	VHEMI04433	A0A0A1TE90	5.8e-10	yes	RRACDVCFKRKIQCSIPSPGSPCDWCDHHDIPCTFR	Fungal_trans domain-containing protein	[Torrubiella] hemipterigena	Pathogen	'Torrubiella' clade (no rank), Clavicipitaceae incertae sedis (no rank), Clavicipitaceae (family), Hypocreales (order), Hypocreomycetidae (subclass), Sordariomycetes (class), sordariomyceta (no rank), leotiomyceta (no rank), Pezizomycotina (subphylum), saccharomyceta (no rank), Ascomycota (phylum), Dikarya (subkingdom), Fungi (kingdom), Opisthokonta (no rank), Eukaryota (superkingdom), cellular o…
A0A0A1TEL2_9HYPO	VHEMI04523	A0A0A1SVI6	6.3e-13	yes	VVPRACHNCRVRKIRCNRECPCSNCLTSNISCRPGSRTAGGTTV	Fungal_trans domain-containing protein	[Torrubiella] hemipterigena	Pathogen	'Torrubiella' clade (no rank), Clavicipitaceae incertae sedis (no rank), Clavicipitaceae (family), Hypocreales (order), Hypocreomycetidae (subclass), Sordariomycetes (class), sordariomyceta (no rank), leotiomyceta (no rank), Pezizomycotina (subphylum), saccharomyceta (no rank), Ascomycota (phylum), Dikarya (subkingdom), Fungi (kingdom), Opisthokonta (no rank), Eukaryota (superkingdom), cellular o…
A0A0A1T423_9HYPO	VHEMI05407	A0A0A1TIN4	1.5e-14	yes	PSARRACDQCRLRKIRCDKDWPCSNCRTAKRSCTSTGAGQRPKE	Fungal_trans domain-containing protein	[Torrubiella] hemipterigena	Pathogen	'Torrubiella' clade (no rank), Clavicipitaceae incertae sedis (no rank), Clavicipitaceae (family), Hypocreales (order), Hypocreomycetidae (subclass), Sordariomycetes (class), sordariomyceta (no rank), leotiomyceta (no rank), Pezizomycotina (subphylum), saccharomyceta (no rank), Ascomycota (phylum), Dikarya (subkingdom), Fungi (kingdom), Opisthokonta (no rank), Eukaryota (superkingdom), cellular o…
A0A0A1TK55_9HYPO	VHEMI05982	A0A0A1TIE5	4.6e-17	no	TVTTACLACRSKHLKCDGSNPCSRCVLSGFECVYVASRRGYRGP	Fungal_trans domain-containing protein	[Torrubiella] hemipterigena	Pathogen	'Torrubiella' clade (no rank), Clavicipitaceae incertae sedis (no rank), Clavicipitaceae (family), Hypocreales (order), Hypocreomycetidae (subclass), Sordariomycetes (class), sordariomyceta (no rank), leotiomyceta (no rank), Pezizomycotina (subphylum), saccharomyceta (no rank), Ascomycota (phylum), Dikarya (subkingdom), Fungi (kingdom), Opisthokonta (no rank), Eukaryota (superkingdom), cellular o…
A0A0A1TL68_9HYPO	VHEMI07196	A0A0A1TMF7	3.4e-15	yes	QRVAKACQTCRSMKSKCDGLQPECSRCRAYGYSCIYRSQRPRTKS	Fungal_trans domain-containing protein	[Torrubiella] hemipterigena	Pathogen	'Torrubiella' clade (no rank), Clavicipitaceae incertae sedis (no rank), Clavicipitaceae (family), Hypocreales (order), Hypocreomycetidae (subclass), Sordariomycetes (class), sordariomyceta (no rank), leotiomyceta (no rank), Pezizomycotina (subphylum), saccharomyceta (no rank), Ascomycota (phylum), Dikarya (subkingdom), Fungi (kingdom), Opisthokonta (no rank), Eukaryota (superkingdom), cellular o…
A0A0A1TMX9_9HYPO	VHEMI07415	A0A084GGL8	2e-07	no	CSTCLTTGTTCTLSTDHDDCVLCRRTGHECSLP	Fungal_trans domain-containing protein	[Torrubiella] hemipterigena	Pathogen	'Torrubiella' clade (no rank), Clavicipitaceae incertae sedis (no rank), Clavicipitaceae (family), Hypocreales (order), Hypocreomycetidae (subclass), Sordariomycetes (class), sordariomyceta (no rank), leotiomyceta (no rank), Pezizomycotina (subphylum), saccharomyceta (no rank), Ascomycota (phylum), Dikarya (subkingdom), Fungi (kingdom), Opisthokonta (no rank), Eukaryota (superkingdom), cellular o…
A0A0A1TAY0_9HYPO	VHEMI07621	Q5AUQ9	1.1e-13	no	DKAQLSCDPCRNRKLKCDRQLPCGTCSRRGRTSSCNYVTTPS	Fungal_trans domain-containing protein	[Torrubiella] hemipterigena	Pathogen	'Torrubiella' clade (no rank), Clavicipitaceae incertae sedis (no rank), Clavicipitaceae (family), Hypocreales (order), Hypocreomycetidae (subclass), Sordariomycetes (class), sordariomyceta (no rank), leotiomyceta (no rank), Pezizomycotina (subphylum), saccharomyceta (no rank), Ascomycota (phylum), Dikarya (subkingdom), Fungi (kingdom), Opisthokonta (no rank), Eukaryota (superkingdom), cellular o…
A0A0A1TML9_9HYPO	VHEMI08117	E4UVG9	5e-15	no	NGALASCEPCRKRKTRCDHQRPVCGSCVQRGVQLRCIYHPSPMTK	Fungal_trans domain-containing protein	[Torrubiella] hemipterigena	Pathogen	'Torrubiella' clade (no rank), Clavicipitaceae incertae sedis (no rank), Clavicipitaceae (family), Hypocreales (order), Hypocreomycetidae (subclass), Sordariomycetes (class), sordariomyceta (no rank), leotiomyceta (no rank), Pezizomycotina (subphylum), saccharomyceta (no rank), Ascomycota (phylum), Dikarya (subkingdom), Fungi (kingdom), Opisthokonta (no rank), Eukaryota (superkingdom), cellular o…
A0A0A1TPE4_9HYPO	VHEMI08921	A0A0A1TQK7	4.5e-14	yes	RVPLSCYPCRTRklKCDRQHPCSNCTKREGDGTSACTYAAPVSSKRSQ	Fungal_trans domain-containing protein	[Torrubiella] hemipterigena	Pathogen	'Torrubiella' clade (no rank), Clavicipitaceae incertae sedis (no rank), Clavicipitaceae (family), Hypocreales (order), Hypocreomycetidae (subclass), Sordariomycetes (class), sordariomyceta (no rank), leotiomyceta (no rank), Pezizomycotina (subphylum), saccharomyceta (no rank), Ascomycota (phylum), Dikarya (subkingdom), Fungi (kingdom), Opisthokonta (no rank), Eukaryota (superkingdom), cellular o…
A0A0A1T9G4_9HYPO	VHEMI09254	A0A0A1TPS1	1.6e-10	yes	RSCWECKRRKVSCKFQTARDSTCLNCFRRNVPCVSQ	Fungal_trans domain-containing protein	[Torrubiella] hemipterigena	Pathogen	'Torrubiella' clade (no rank), Clavicipitaceae incertae sedis (no rank), Clavicipitaceae (family), Hypocreales (order), Hypocreomycetidae (subclass), Sordariomycetes (class), sordariomyceta (no rank), leotiomyceta (no rank), Pezizomycotina (subphylum), saccharomyceta (no rank), Ascomycota (phylum), Dikarya (subkingdom), Fungi (kingdom), Opisthokonta (no rank), Eukaryota (superkingdom), cellular o…
A0A0A1TG15_9HYPO	VHEMI09281	A0A0A1TQ38	2.4e-15	yes	RSHHACLPCrRKKTRCPAEKPACSSCTRLHQPCSYPPPRRPSHSS	Fungal_trans domain-containing protein	[Torrubiella] hemipterigena	Pathogen	'Torrubiella' clade (no rank), Clavicipitaceae incertae sedis (no rank), Clavicipitaceae (family), Hypocreales (order), Hypocreomycetidae (subclass), Sordariomycetes (class), sordariomyceta (no rank), leotiomyceta (no rank), Pezizomycotina (subphylum), saccharomyceta (no rank), Ascomycota (phylum), Dikarya (subkingdom), Fungi (kingdom), Opisthokonta (no rank), Eukaryota (superkingdom), cellular o…
A0A0A1TT43_9HYPO	VHEMI10321	A0A0E9NBP2	8.2e-05	no	KQVQQACEACRRKKVCCHQPDRDSGCRRCRFEKSFLQKREPTTASAS	Fungal_trans domain-containing protein	[Torrubiella] hemipterigena	Pathogen	'Torrubiella' clade (no rank), Clavicipitaceae incertae sedis (no rank), Clavicipitaceae (family), Hypocreales (order), Hypocreomycetidae (subclass), Sordariomycetes (class), sordariomyceta (no rank), leotiomyceta (no rank), Pezizomycotina (subphylum), saccharomyceta (no rank), Ascomycota (phylum), Dikarya (subkingdom), Fungi (kingdom), Opisthokonta (no rank), Eukaryota (superkingdom), cellular o…
A0A163KN93_ABSGL	SAL94929	A0A168P2X2	9.7e-16	no	RAKRSCDLCRKKKIRCDADVKKPCTSCANVNVDCKFLVEQKKRGPA	Fungal_trans domain-containing protein	Absidia glauca (Pin mould)	Non-Pathogen	Absidia (genus), Cunninghamellaceae (family), Mucorales (order), Mucoromycetes (class), Mucoromycotina (subphylum), Mucoromycota (phylum), Fungi incertae sedis (no rank), Fungi (kingdom), Opisthokonta (no rank), Eukaryota (superkingdom), cellular organisms (no rank)
A0A168MM65_ABSGL	SAL98806	A0A0C9MYN1	3.7e-16	no	RMTLACERCrSKKvKCDAIHPTCTRCRQTNaSCSYTGSSTQVDLF	Fungal_trans domain-containing protein	Absidia glauca (Pin mould)	Non-Pathogen	Absidia (genus), Cunninghamellaceae (family), Mucorales (order), Mucoromycetes (class), Mucoromycotina (subphylum), Mucoromycota (phylum), Fungi incertae sedis (no rank), Fungi (kingdom), Opisthokonta (no rank), Eukaryota (superkingdom), cellular organisms (no rank)
A0A168NGD3_ABSGL	SAM00499	A0A077WUK9	2.5e-13	no	RVSRAcNFCRKKKIkCNIDQQMPCSSCVQYRCECTSNDSPRKRPPP	Fungal_trans domain-containing protein	Absidia glauca (Pin mould)	Non-Pathogen	Absidia (genus), Cunninghamellaceae (family), Mucorales (order), Mucoromycetes (class), Mucoromycotina (subphylum), Mucoromycota (phylum), Fungi incertae sedis (no rank), Fungi (kingdom), Opisthokonta (no rank), Eukaryota (superkingdom), cellular organisms (no rank)
A0A168Q1S3_ABSGL	SAM03364	A0A077WLQ0	2.2e-13	no	RVSRAcDVCRRKKVKCNTNGAGSSCKNCSLANTVCTFNDsAKKRGPP	Fungal_trans domain-containing protein	Absidia glauca (Pin mould)	Non-Pathogen	Absidia (genus), Cunninghamellaceae (family), Mucorales (order), Mucoromycetes (class), Mucoromycotina (subphylum), Mucoromycota (phylum), Fungi incertae sedis (no rank), Fungi (kingdom), Opisthokonta (no rank), Eukaryota (superkingdom), cellular organisms (no rank)
A0A163L171_ABSGL	SAM03370	A0A163MK34	1.7e-14	no	RISRAcDTCRKKKIrCDVDNCQPCTTCRQYEWECTFNDTVRKRGPP	Fungal_trans domain-containing protein	Absidia glauca (Pin mould)	Non-Pathogen	Absidia (genus), Cunninghamellaceae (family), Mucorales (order), Mucoromycetes (class), Mucoromycotina (subphylum), Mucoromycota (phylum), Fungi incertae sedis (no rank), Fungi (kingdom), Opisthokonta (no rank), Eukaryota (superkingdom), cellular organisms (no rank)
A0A168Q5X0_ABSGL	SAM03630	A0A168SS77	8.9e-14	no	RMTLACVRCrSKKvKCDTAHPSCDRCSQAKvSCSYEGTSTQVDLF	Fungal_trans domain-containing protein	Absidia glauca (Pin mould)	Non-Pathogen	Absidia (genus), Cunninghamellaceae (family), Mucorales (order), Mucoromycetes (class), Mucoromycotina (subphylum), Mucoromycota (phylum), Fungi incertae sedis (no rank), Fungi (kingdom), Opisthokonta (no rank), Eukaryota (superkingdom), cellular organisms (no rank)
A0A163K2E9_ABSGL	SAM04851	A0A077X1Z6	1.7e-14	no	QGGRACHPCRMKKVKCDGKQPCIQCKaRRRKCMFVKNATDTYIR	Fungal_trans domain-containing protein	Absidia glauca (Pin mould)	Non-Pathogen	Absidia (genus), Cunninghamellaceae (family), Mucorales (order), Mucoromycetes (class), Mucoromycotina (subphylum), Mucoromycota (phylum), Fungi incertae sedis (no rank), Fungi (kingdom), Opisthokonta (no rank), Eukaryota (superkingdom), cellular organisms (no rank)
A0A168RMB3_ABSGL	SAM07130	A0A077WSB5	1.7e-13	no	KVSKACYTCRVKKIKCDGLNPCMQCKaRQRPCSFSVDGADSGSL	Fungal_trans domain-containing protein	Absidia glauca (Pin mould)	Non-Pathogen	Absidia (genus), Cunninghamellaceae (family), Mucorales (order), Mucoromycetes (class), Mucoromycotina (subphylum), Mucoromycota (phylum), Fungi incertae sedis (no rank), Fungi (kingdom), Opisthokonta (no rank), Eukaryota (superkingdom), cellular organisms (no rank)
A0A150UTY4_9PEZI	M433DRAFT_137781	A0A1L9PKF4	2e-08	no	SARScDFCRKRRCKCIPLPSGHGCVMCQGHHMECSYD	Fungal_trans domain-containing protein	Acidomyces richmondensis BFW	Non-Pathogen	Acidomyces sp. 'richmondensis' (species), unclassified Acidomyces (no rank), Acidomyces (genus), Teratosphaeriaceae (family), Mycosphaerellales (order), Dothideomycetidae (subclass), Dothideomycetes (class), dothideomyceta (no rank), leotiomyceta (no rank), Pezizomycotina (subphylum), saccharomyceta (no rank), Ascomycota (phylum), Dikarya (subkingdom), Fungi (kingdom), Opisthokonta (no rank), Euk…
A0A150UW16_9PEZI	M433DRAFT_146763	A0A150VBK6	1.3e-12	no	LSCHACRRLKRKCSKDVPACSLCSRVGRKCKY	Fungal_trans domain-containing protein	Acidomyces richmondensis BFW	Non-Pathogen	Acidomyces sp. 'richmondensis' (species), unclassified Acidomyces (no rank), Acidomyces (genus), Teratosphaeriaceae (family), Mycosphaerellales (order), Dothideomycetidae (subclass), Dothideomycetes (class), dothideomyceta (no rank), leotiomyceta (no rank), Pezizomycotina (subphylum), saccharomyceta (no rank), Ascomycota (phylum), Dikarya (subkingdom), Fungi (kingdom), Opisthokonta (no rank), Euk…
A0A150VHB4_9PEZI	M433DRAFT_149553	A0A0D1Y2H3	1.8e-13	no	KSHLSCSECRRRKSKCDRCNPCGNCTKYRRTCTYEKLFRTPLTR	Fungal_trans domain-containing protein	Acidomyces richmondensis BFW	Non-Pathogen	Acidomyces sp. 'richmondensis' (species), unclassified Acidomyces (no rank), Acidomyces (genus), Teratosphaeriaceae (family), Mycosphaerellales (order), Dothideomycetidae (subclass), Dothideomycetes (class), dothideomyceta (no rank), leotiomyceta (no rank), Pezizomycotina (subphylum), saccharomyceta (no rank), Ascomycota (phylum), Dikarya (subkingdom), Fungi (kingdom), Opisthokonta (no rank), Euk…
A0A150UZK8_9PEZI	M433DRAFT_156320	A0A1X7RJV1	3.1e-12	no	QRISQACDLCHRRSIRCRPSSENPQQKCQNCYDFGVECTYKRPSRRRRN	Fungal_trans domain-containing protein	Acidomyces richmondensis BFW	Non-Pathogen	Acidomyces sp. 'richmondensis' (species), unclassified Acidomyces (no rank), Acidomyces (genus), Teratosphaeriaceae (family), Mycosphaerellales (order), Dothideomycetidae (subclass), Dothideomycetes (class), dothideomyceta (no rank), leotiomyceta (no rank), Pezizomycotina (subphylum), saccharomyceta (no rank), Ascomycota (phylum), Dikarya (subkingdom), Fungi (kingdom), Opisthokonta (no rank), Euk…
A0A150VEE1_9PEZI	M433DRAFT_33369	A0A2J6S4S4	1.3e-13	no	GLACLTCRKRKARCSRTLPTCSHCRDSGRACAYPSAPLKPGP	Fungal_trans domain-containing protein	Acidomyces richmondensis BFW	Non-Pathogen	Acidomyces sp. 'richmondensis' (species), unclassified Acidomyces (no rank), Acidomyces (genus), Teratosphaeriaceae (family), Mycosphaerellales (order), Dothideomycetidae (subclass), Dothideomycetes (class), dothideomyceta (no rank), leotiomyceta (no rank), Pezizomycotina (subphylum), saccharomyceta (no rank), Ascomycota (phylum), Dikarya (subkingdom), Fungi (kingdom), Opisthokonta (no rank), Euk…
A0A150V9G1_9PEZI	M433DRAFT_512102	M2LIS0	1.1e-13	no	GKLFSCEPCRRGKLRCDHISPVCGRCARRNKPEQCIYHPAPLTKTRG	Fungal_trans domain-containing protein	Acidomyces richmondensis BFW	Non-Pathogen	Acidomyces sp. 'richmondensis' (species), unclassified Acidomyces (no rank), Acidomyces (genus), Teratosphaeriaceae (family), Mycosphaerellales (order), Dothideomycetidae (subclass), Dothideomycetes (class), dothideomyceta (no rank), leotiomyceta (no rank), Pezizomycotina (subphylum), saccharomyceta (no rank), Ascomycota (phylum), Dikarya (subkingdom), Fungi (kingdom), Opisthokonta (no rank), Euk…
A0A150VAI5_9PEZI	M433DRAFT_63014	M2LIV5	4.9e-13	no	RVSQACEACAGLHLKCEEEKPCKRCTKKGIHCNFTAAFAPPS	Fungal_trans domain-containing protein	Acidomyces richmondensis BFW	Non-Pathogen	Acidomyces sp. 'richmondensis' (species), unclassified Acidomyces (no rank), Acidomyces (genus), Teratosphaeriaceae (family), Mycosphaerellales (order), Dothideomycetidae (subclass), Dothideomycetes (class), dothideomyceta (no rank), leotiomyceta (no rank), Pezizomycotina (subphylum), saccharomyceta (no rank), Ascomycota (phylum), Dikarya (subkingdom), Fungi (kingdom), Opisthokonta (no rank), Euk…
A0A150V4Q7_9PEZI	M433DRAFT_67156	A0A135SI96	5.7e-12	no	SARRTCSQCRHRKVKCDGNSSGCRNCYRLQFRCSFL	Fungal_trans domain-containing protein	Acidomyces richmondensis BFW	Non-Pathogen	Acidomyces sp. 'richmondensis' (species), unclassified Acidomyces (no rank), Acidomyces (genus), Teratosphaeriaceae (family), Mycosphaerellales (order), Dothideomycetidae (subclass), Dothideomycetes (class), dothideomyceta (no rank), leotiomyceta (no rank), Pezizomycotina (subphylum), saccharomyceta (no rank), Ascomycota (phylum), Dikarya (subkingdom), Fungi (kingdom), Opisthokonta (no rank), Euk…
A0A150V4S4_9PEZI	M433DRAFT_67191	N1PPJ6	1.8e-15	no	SRKITACVACRKQKIRCQMEGDGRPCVRCRKRGLSCTVNKSLQMILQ	Fungal_trans domain-containing protein	Acidomyces richmondensis BFW	Non-Pathogen	Acidomyces sp. 'richmondensis' (species), unclassified Acidomyces (no rank), Acidomyces (genus), Teratosphaeriaceae (family), Mycosphaerellales (order), Dothideomycetidae (subclass), Dothideomycetes (class), dothideomyceta (no rank), leotiomyceta (no rank), Pezizomycotina (subphylum), saccharomyceta (no rank), Ascomycota (phylum), Dikarya (subkingdom), Fungi (kingdom), Opisthokonta (no rank), Euk…
A0A086TG31_ACRC1	ACRE_008180	A0A135TY29	6.1e-14	no	RQPQVSCDFCRKKKLKCDRGRPCTNCSVRRLPCGHQ	Fungal_trans domain-containing protein	Acremonium chrysogenum (strain ATCC 11550 / CBS 779.69 / DSM 880 / IAM 14645 / JCM 23072 / IMI 49137)	Pathogen	Acremonium chrysogenum (species), Acremonium (genus), Hypocreales incertae sedis (no rank), Hypocreales (order), Hypocreomycetidae (subclass), Sordariomycetes (class), sordariomyceta (no rank), leotiomyceta (no rank), Pezizomycotina (subphylum), saccharomyceta (no rank), Ascomycota (phylum), Dikarya (subkingdom), Fungi (kingdom), Opisthokonta (no rank), Eukaryota (superkingdom), cellular organism…
A0A086TC94_ACRC1	ACRE_021030	A0A178DLJ9	3.3e-11	no	TASNRCRACHARKVKCSGGTPCTNCRQGRRRLECKYPNRVRRIKV	Putative transcriptional regulatory protein-like protein	Acremonium chrysogenum (strain ATCC 11550 / CBS 779.69 / DSM 880 / IAM 14645 / JCM 23072 / IMI 49137)	Pathogen	Acremonium chrysogenum (species), Acremonium (genus), Hypocreales incertae sedis (no rank), Hypocreales (order), Hypocreomycetidae (subclass), Sordariomycetes (class), sordariomyceta (no rank), leotiomyceta (no rank), Pezizomycotina (subphylum), saccharomyceta (no rank), Ascomycota (phylum), Dikarya (subkingdom), Fungi (kingdom), Opisthokonta (no rank), Eukaryota (superkingdom), cellular organism…
A0A086TCI9_ACRC1	ACRE_021170	C7ZH17	7.5e-16	no	RRSHHACLTCRRQKTRCPGERPACSSCVRLRKQCSYPPSSRP	Fungal_trans domain-containing protein	Acremonium chrysogenum (strain ATCC 11550 / CBS 779.69 / DSM 880 / IAM 14645 / JCM 23072 / IMI 49137)	Pathogen	Acremonium chrysogenum (species), Acremonium (genus), Hypocreales incertae sedis (no rank), Hypocreales (order), Hypocreomycetidae (subclass), Sordariomycetes (class), sordariomyceta (no rank), leotiomyceta (no rank), Pezizomycotina (subphylum), saccharomyceta (no rank), Ascomycota (phylum), Dikarya (subkingdom), Fungi (kingdom), Opisthokonta (no rank), Eukaryota (superkingdom), cellular organism…
A0A086T9R4_ACRC1	ACRE_031200	N1S917	1.9e-16	no	ACDFCVSRKIKCDGSKPTCSNCRLYGVECRITGVTN	Putative transcriptional regulatory protein-like protein	Acremonium chrysogenum (strain ATCC 11550 / CBS 779.69 / DSM 880 / IAM 14645 / JCM 23072 / IMI 49137)	Pathogen	Acremonium chrysogenum (species), Acremonium (genus), Hypocreales incertae sedis (no rank), Hypocreales (order), Hypocreomycetidae (subclass), Sordariomycetes (class), sordariomyceta (no rank), leotiomyceta (no rank), Pezizomycotina (subphylum), saccharomyceta (no rank), Ascomycota (phylum), Dikarya (subkingdom), Fungi (kingdom), Opisthokonta (no rank), Eukaryota (superkingdom), cellular organism…
A0A086T9J6_ACRC1	ACRE_031960	A0A024S5E0	6.9e-14	no	RVTRACDRCKkRKTKCTGLQPCRLCSEMMVPCTYTASYFRGRPP	Activator of stress genes-like protein	Acremonium chrysogenum (strain ATCC 11550 / CBS 779.69 / DSM 880 / IAM 14645 / JCM 23072 / IMI 49137)	Pathogen	Acremonium chrysogenum (species), Acremonium (genus), Hypocreales incertae sedis (no rank), Hypocreales (order), Hypocreomycetidae (subclass), Sordariomycetes (class), sordariomyceta (no rank), leotiomyceta (no rank), Pezizomycotina (subphylum), saccharomyceta (no rank), Ascomycota (phylum), Dikarya (subkingdom), Fungi (kingdom), Opisthokonta (no rank), Eukaryota (superkingdom), cellular organism…
A0A086T999_ACRC1	ACRE_032570	L2G7M3	3.9e-06	no	TQSLPPCRACRYAGTRCIPSEDDEGCKSCQASAAECSLSSSPQFRKR	Transcriptional activator protein-like protein	Acremonium chrysogenum (strain ATCC 11550 / CBS 779.69 / DSM 880 / IAM 14645 / JCM 23072 / IMI 49137)	Pathogen	Acremonium chrysogenum (species), Acremonium (genus), Hypocreales incertae sedis (no rank), Hypocreales (order), Hypocreomycetidae (subclass), Sordariomycetes (class), sordariomyceta (no rank), leotiomyceta (no rank), Pezizomycotina (subphylum), saccharomyceta (no rank), Ascomycota (phylum), Dikarya (subkingdom), Fungi (kingdom), Opisthokonta (no rank), Eukaryota (superkingdom), cellular organism…
A0A086T6Q4_ACRC1	ACRE_041100	A0A0C2EZI6	1.4e-10	no	RASIACAGCRARRTRCIIGEGQSACDRCIKTNKPCVIRDDDQRKtPF	Nitrogen assimilation transcription factor-like protein	Acremonium chrysogenum (strain ATCC 11550 / CBS 779.69 / DSM 880 / IAM 14645 / JCM 23072 / IMI 49137)	Pathogen	Acremonium chrysogenum (species), Acremonium (genus), Hypocreales incertae sedis (no rank), Hypocreales (order), Hypocreomycetidae (subclass), Sordariomycetes (class), sordariomyceta (no rank), leotiomyceta (no rank), Pezizomycotina (subphylum), saccharomyceta (no rank), Ascomycota (phylum), Dikarya (subkingdom), Fungi (kingdom), Opisthokonta (no rank), Eukaryota (superkingdom), cellular organism…
A0A086T434_ACRC1	ACRE_051100	A0A166LA90	1.2e-13	no	AVSTaCRRCHSRKVKCSGGQPCDGCRRASKSSECTYPQRTRLIKVD	Putative transcriptional regulatory protein-like protein	Acremonium chrysogenum (strain ATCC 11550 / CBS 779.69 / DSM 880 / IAM 14645 / JCM 23072 / IMI 49137)	Pathogen	Acremonium chrysogenum (species), Acremonium (genus), Hypocreales incertae sedis (no rank), Hypocreales (order), Hypocreomycetidae (subclass), Sordariomycetes (class), sordariomyceta (no rank), leotiomyceta (no rank), Pezizomycotina (subphylum), saccharomyceta (no rank), Ascomycota (phylum), Dikarya (subkingdom), Fungi (kingdom), Opisthokonta (no rank), Eukaryota (superkingdom), cellular organism…
A0A086T3N2_ACRC1	ACRE_052530	A0A179GYY8	2.4e-13	no	RVATaCNNCNLRRTKCSGDQPCTQCAASSRECVYPVSMPKVSIS	Putative transcriptional regulatory protein-like protein	Acremonium chrysogenum (strain ATCC 11550 / CBS 779.69 / DSM 880 / IAM 14645 / JCM 23072 / IMI 49137)	Pathogen	Acremonium chrysogenum (species), Acremonium (genus), Hypocreales incertae sedis (no rank), Hypocreales (order), Hypocreomycetidae (subclass), Sordariomycetes (class), sordariomyceta (no rank), leotiomyceta (no rank), Pezizomycotina (subphylum), saccharomyceta (no rank), Ascomycota (phylum), Dikarya (subkingdom), Fungi (kingdom), Opisthokonta (no rank), Eukaryota (superkingdom), cellular organism…
A0A086T1C2_ACRC1	ACRE_060900	X0MI58	5.6e-16	no	HSCDICRQRKVKCSGSHPCTSCVRRGLKCEFGFVGRRGYSE	Putative transcriptional regulatory protein-like protein	Acremonium chrysogenum (strain ATCC 11550 / CBS 779.69 / DSM 880 / IAM 14645 / JCM 23072 / IMI 49137)	Pathogen	Acremonium chrysogenum (species), Acremonium (genus), Hypocreales incertae sedis (no rank), Hypocreales (order), Hypocreomycetidae (subclass), Sordariomycetes (class), sordariomyceta (no rank), leotiomyceta (no rank), Pezizomycotina (subphylum), saccharomyceta (no rank), Ascomycota (phylum), Dikarya (subkingdom), Fungi (kingdom), Opisthokonta (no rank), Eukaryota (superkingdom), cellular organism…
A0A086T0J7_ACRC1	ACRE_063930	A0A150VD55	1.6e-09	no	IACESCRTKKVREGTRPACMQCSHDPSQCHYPEQNKRG	Transcriptional activator protein-like protein	Acremonium chrysogenum (strain ATCC 11550 / CBS 779.69 / DSM 880 / IAM 14645 / JCM 23072 / IMI 49137)	Pathogen	Acremonium chrysogenum (species), Acremonium (genus), Hypocreales incertae sedis (no rank), Hypocreales (order), Hypocreomycetidae (subclass), Sordariomycetes (class), sordariomyceta (no rank), leotiomyceta (no rank), Pezizomycotina (subphylum), saccharomyceta (no rank), Ascomycota (phylum), Dikarya (subkingdom), Fungi (kingdom), Opisthokonta (no rank), Eukaryota (superkingdom), cellular organism…
A0A086SZG1_ACRC1	ACRE_068120	A0A178DQY1	3.3e-15	no	AAGVAcNGCRKAKLRCSRDRPACSHCIKIgQDCVYQTKRVKPGIK	Fungal_trans domain-containing protein	Acremonium chrysogenum (strain ATCC 11550 / CBS 779.69 / DSM 880 / IAM 14645 / JCM 23072 / IMI 49137)	Pathogen	Acremonium chrysogenum (species), Acremonium (genus), Hypocreales incertae sedis (no rank), Hypocreales (order), Hypocreomycetidae (subclass), Sordariomycetes (class), sordariomyceta (no rank), leotiomyceta (no rank), Pezizomycotina (subphylum), saccharomyceta (no rank), Ascomycota (phylum), Dikarya (subkingdom), Fungi (kingdom), Opisthokonta (no rank), Eukaryota (superkingdom), cellular organism…
A0A086SXZ5_ACRC1	ACRE_073040	A0A194W9X0	5.1e-14	no	RTRRACDKCNTSRTRCNGDHPcGRCQeYGYDCHYKRQAKKRGRV	Xylanolytic transcriptional activator-like protein	Acremonium chrysogenum (strain ATCC 11550 / CBS 779.69 / DSM 880 / IAM 14645 / JCM 23072 / IMI 49137)	Pathogen	Acremonium chrysogenum (species), Acremonium (genus), Hypocreales incertae sedis (no rank), Hypocreales (order), Hypocreomycetidae (subclass), Sordariomycetes (class), sordariomyceta (no rank), leotiomyceta (no rank), Pezizomycotina (subphylum), saccharomyceta (no rank), Ascomycota (phylum), Dikarya (subkingdom), Fungi (kingdom), Opisthokonta (no rank), Eukaryota (superkingdom), cellular organism…
A0A086SXV5_ACRC1	ACRE_073440	G9ML49	4.8e-11	no	PPCTRSCDMCRKKKKRCEPMLQGCVQCSKSGPKCHFTPIASKRKP	Putative transcriptional regulatory protein-like protein	Acremonium chrysogenum (strain ATCC 11550 / CBS 779.69 / DSM 880 / IAM 14645 / JCM 23072 / IMI 49137)	Pathogen	Acremonium chrysogenum (species), Acremonium (genus), Hypocreales incertae sedis (no rank), Hypocreales (order), Hypocreomycetidae (subclass), Sordariomycetes (class), sordariomyceta (no rank), leotiomyceta (no rank), Pezizomycotina (subphylum), saccharomyceta (no rank), Ascomycota (phylum), Dikarya (subkingdom), Fungi (kingdom), Opisthokonta (no rank), Eukaryota (superkingdom), cellular organism…
A0A086SWC2_ACRC1	ACRE_078720	A0A0L0MZ92	4.7e-15	no	RASRACETCHARKVRCDAASLGVPCTNCVAFNIDCRIPTPKRKKAQN	Cutinase transcription factor 1 alpha-like protein	Acremonium chrysogenum (strain ATCC 11550 / CBS 779.69 / DSM 880 / IAM 14645 / JCM 23072 / IMI 49137)	Pathogen	Acremonium chrysogenum (species), Acremonium (genus), Hypocreales incertae sedis (no rank), Hypocreales (order), Hypocreomycetidae (subclass), Sordariomycetes (class), sordariomyceta (no rank), leotiomyceta (no rank), Pezizomycotina (subphylum), saccharomyceta (no rank), Ascomycota (phylum), Dikarya (subkingdom), Fungi (kingdom), Opisthokonta (no rank), Eukaryota (superkingdom), cellular organism…
K5Y3E4_AGABU	AGABI1DRAFT_117930	A0A2A9NMH2	9.4e-16	no	KTQRACDSCRSRKIRCDILPDVDPPICQHCKQFSFECTFFLPITETRFK	Fungal_trans domain-containing protein	Agaricus bisporus var. burnettii (strain JB137-S8 / ATCC MYA-4627 / FGSC 10392) (White button mushroom)	Pathogen	Agaricus bisporus var. burnettii (varietas), Agaricus bisporus (species), Agaricus (genus), Agaricaceae (family), Agaricales (order), Agaricomycetidae (subclass), Agaricomycetes (class), Agaricomycotina (subphylum), Basidiomycota (phylum), Dikarya (subkingdom), Fungi (kingdom), Opisthokonta (no rank), Eukaryota (superkingdom), cellular organisms (no rank)
K5XDJ1_AGABU	AGABI1DRAFT_125799	A0A067TDM1	8.5e-13	no	LQVSCAECRRLKIKCDKKIPCQSCLRRGCVSLCPNGSLSTGQGT	Fungal_trans domain-containing protein	Agaricus bisporus var. burnettii (strain JB137-S8 / ATCC MYA-4627 / FGSC 10392) (White button mushroom)	Pathogen	Agaricus bisporus var. burnettii (varietas), Agaricus bisporus (species), Agaricus (genus), Agaricaceae (family), Agaricales (order), Agaricomycetidae (subclass), Agaricomycetes (class), Agaricomycotina (subphylum), Basidiomycota (phylum), Dikarya (subkingdom), Fungi (kingdom), Opisthokonta (no rank), Eukaryota (superkingdom), cellular organisms (no rank)
K5X2E5_AGABU	AGABI1DRAFT_126341	A0A0C9XVL4	8e-11	no	KVGLSCAECRrSKLKCDrVFPCQSCVrRGCASICPDgILPATKGNk	Fungal_trans domain-containing protein	Agaricus bisporus var. burnettii (strain JB137-S8 / ATCC MYA-4627 / FGSC 10392) (White button mushroom)	Pathogen	Agaricus bisporus var. burnettii (varietas), Agaricus bisporus (species), Agaricus (genus), Agaricaceae (family), Agaricales (order), Agaricomycetidae (subclass), Agaricomycetes (class), Agaricomycotina (subphylum), Basidiomycota (phylum), Dikarya (subkingdom), Fungi (kingdom), Opisthokonta (no rank), Eukaryota (superkingdom), cellular organisms (no rank)
K5VP97_AGABU	AGABI1DRAFT_45090	A0A0D2P682	2e-10	no	RlPGACKHCKKLKMKCDFPKGDNTCKRCRSTGHVCIVEGRKPRTMPn	Fungal_trans domain-containing protein	Agaricus bisporus var. burnettii (strain JB137-S8 / ATCC MYA-4627 / FGSC 10392) (White button mushroom)	Pathogen	Agaricus bisporus var. burnettii (varietas), Agaricus bisporus (species), Agaricus (genus), Agaricaceae (family), Agaricales (order), Agaricomycetidae (subclass), Agaricomycetes (class), Agaricomycotina (subphylum), Basidiomycota (phylum), Dikarya (subkingdom), Fungi (kingdom), Opisthokonta (no rank), Eukaryota (superkingdom), cellular organisms (no rank)
C0NEJ5_AJECG	HCBG_01311	A0A179UYI2	3.1e-15	no	ERPQLSCTTCRQKKLKCDRNLPCENCSTRGRGATCVYANPPPPGQT	Fungal_trans domain-containing protein	Ajellomyces capsulatus (strain G186AR / H82 / ATCC MYA-2454 / RMSCC 2432) (Darling's disease fungus) (Histoplasma capsulatum)	Pathogen	Ajellomyces capsulatus (species), Histoplasma (genus), Ajellomycetaceae (family), Onygenales (order), Eurotiomycetidae (subclass), Eurotiomycetes (class), leotiomyceta (no rank), Pezizomycotina (subphylum), saccharomyceta (no rank), Ascomycota (phylum), Dikarya (subkingdom), Fungi (kingdom), Opisthokonta (no rank), Eukaryota (superkingdom), cellular organisms (no rank)
C0NF21_AJECG	HCBG_01487	A0A0G2I0X1	4.3e-17	no	RVSHACDPCRKRKSKCDGLRPVCSRCRDQEITCVYLDGKREKLKR	Fungal_trans domain-containing protein	Ajellomyces capsulatus (strain G186AR / H82 / ATCC MYA-2454 / RMSCC 2432) (Darling's disease fungus) (Histoplasma capsulatum)	Pathogen	Ajellomyces capsulatus (species), Histoplasma (genus), Ajellomycetaceae (family), Onygenales (order), Eurotiomycetidae (subclass), Eurotiomycetes (class), leotiomyceta (no rank), Pezizomycotina (subphylum), saccharomyceta (no rank), Ascomycota (phylum), Dikarya (subkingdom), Fungi (kingdom), Opisthokonta (no rank), Eukaryota (superkingdom), cellular organisms (no rank)
C0NFQ5_AJECG	HCBG_01721	T5BGI2	1.3e-14	no	RCVSTACIACRKRKSKCDGNTPTCAACASVYHTPCIYDPNSDHRRK	Nitrogen assimilation transcription factor nirA	Ajellomyces capsulatus (strain G186AR / H82 / ATCC MYA-2454 / RMSCC 2432) (Darling's disease fungus) (Histoplasma capsulatum)	Pathogen	Ajellomyces capsulatus (species), Histoplasma (genus), Ajellomycetaceae (family), Onygenales (order), Eurotiomycetidae (subclass), Eurotiomycetes (class), leotiomyceta (no rank), Pezizomycotina (subphylum), saccharomyceta (no rank), Ascomycota (phylum), Dikarya (subkingdom), Fungi (kingdom), Opisthokonta (no rank), Eukaryota (superkingdom), cellular organisms (no rank)
C0NII5_AJECG	HCBG_02242	A0A179UT22	7.5e-14	no	SASRACDNCRIRKIKCDRGSPCSNCRIAKSVCRTSPRVREQRQR	Fungal specific transcription factor domain-containing protein	Ajellomyces capsulatus (strain G186AR / H82 / ATCC MYA-2454 / RMSCC 2432) (Darling's disease fungus) (Histoplasma capsulatum)	Pathogen	Ajellomyces capsulatus (species), Histoplasma (genus), Ajellomycetaceae (family), Onygenales (order), Eurotiomycetidae (subclass), Eurotiomycetes (class), leotiomyceta (no rank), Pezizomycotina (subphylum), saccharomyceta (no rank), Ascomycota (phylum), Dikarya (subkingdom), Fungi (kingdom), Opisthokonta (no rank), Eukaryota (superkingdom), cellular organisms (no rank)
C0NGX7_AJECG	HCBG_02599	A0A179U7D4	7.3e-12	no	APIaCNYCRKRKTKCLGGNGRLACRACSVAGRTCTYPDAQRTVRVPE	Fungal_trans domain-containing protein	Ajellomyces capsulatus (strain G186AR / H82 / ATCC MYA-2454 / RMSCC 2432) (Darling's disease fungus) (Histoplasma capsulatum)	Pathogen	Ajellomyces capsulatus (species), Histoplasma (genus), Ajellomycetaceae (family), Onygenales (order), Eurotiomycetidae (subclass), Eurotiomycetes (class), leotiomyceta (no rank), Pezizomycotina (subphylum), saccharomyceta (no rank), Ascomycota (phylum), Dikarya (subkingdom), Fungi (kingdom), Opisthokonta (no rank), Eukaryota (superkingdom), cellular organisms (no rank)
C0NHM4_AJECG	HCBG_02846	A0A0G2JAZ1	3e-09	no	RLVRSCSECSRRKQKCNRNWPCNNCAGSRAHLCRYDHTVKRCTPS	Fungal_trans domain-containing protein	Ajellomyces capsulatus (strain G186AR / H82 / ATCC MYA-2454 / RMSCC 2432) (Darling's disease fungus) (Histoplasma capsulatum)	Pathogen	Ajellomyces capsulatus (species), Histoplasma (genus), Ajellomycetaceae (family), Onygenales (order), Eurotiomycetidae (subclass), Eurotiomycetes (class), leotiomyceta (no rank), Pezizomycotina (subphylum), saccharomyceta (no rank), Ascomycota (phylum), Dikarya (subkingdom), Fungi (kingdom), Opisthokonta (no rank), Eukaryota (superkingdom), cellular organisms (no rank)
C0NK11_AJECG	HCBG_03541	A0A0H1B6Y8	3.5e-15	no	FRARACENCRLRKIKCDKAIPCSSCGTLGITCHAASSRLTERPP	Fungal_trans domain-containing protein	Ajellomyces capsulatus (strain G186AR / H82 / ATCC MYA-2454 / RMSCC 2432) (Darling's disease fungus) (Histoplasma capsulatum)	Pathogen	Ajellomyces capsulatus (species), Histoplasma (genus), Ajellomycetaceae (family), Onygenales (order), Eurotiomycetidae (subclass), Eurotiomycetes (class), leotiomyceta (no rank), Pezizomycotina (subphylum), saccharomyceta (no rank), Ascomycota (phylum), Dikarya (subkingdom), Fungi (kingdom), Opisthokonta (no rank), Eukaryota (superkingdom), cellular organisms (no rank)
C0NKG1_AJECG	HCBG_03641	A0A179UAE7	2.6e-13	no	RALRCSNCQLKHIRCDGAQPVCSTCLQKDRICQYPQSSPAAAK	Fungal_trans domain-containing protein	Ajellomyces capsulatus (strain G186AR / H82 / ATCC MYA-2454 / RMSCC 2432) (Darling's disease fungus) (Histoplasma capsulatum)	Pathogen	Ajellomyces capsulatus (species), Histoplasma (genus), Ajellomycetaceae (family), Onygenales (order), Eurotiomycetidae (subclass), Eurotiomycetes (class), leotiomyceta (no rank), Pezizomycotina (subphylum), saccharomyceta (no rank), Ascomycota (phylum), Dikarya (subkingdom), Fungi (kingdom), Opisthokonta (no rank), Eukaryota (superkingdom), cellular organisms (no rank)
C0NKY7_AJECG	HCBG_03817	F0UDN6	2.4e-12	no	RKDPSCDACRERKVKCDASDSSSCTECSNRNVRCLFTKETNRRMSS	Fungal specific transcription factor domain-containing protein	Ajellomyces capsulatus (strain G186AR / H82 / ATCC MYA-2454 / RMSCC 2432) (Darling's disease fungus) (Histoplasma capsulatum)	Pathogen	Ajellomyces capsulatus (species), Histoplasma (genus), Ajellomycetaceae (family), Onygenales (order), Eurotiomycetidae (subclass), Eurotiomycetes (class), leotiomyceta (no rank), Pezizomycotina (subphylum), saccharomyceta (no rank), Ascomycota (phylum), Dikarya (subkingdom), Fungi (kingdom), Opisthokonta (no rank), Eukaryota (superkingdom), cellular organisms (no rank)
C0NNN3_AJECG	HCBG_04763	A0A0G2I4E2	7.4e-16	no	AHTLTACTRCRQRKSRCDPGIPRCEPCQRSNAKCVYYDPARNRTI	Fungal specific transcription factor domain-containing protein	Ajellomyces capsulatus (strain G186AR / H82 / ATCC MYA-2454 / RMSCC 2432) (Darling's disease fungus) (Histoplasma capsulatum)	Pathogen	Ajellomyces capsulatus (species), Histoplasma (genus), Ajellomycetaceae (family), Onygenales (order), Eurotiomycetidae (subclass), Eurotiomycetes (class), leotiomyceta (no rank), Pezizomycotina (subphylum), saccharomyceta (no rank), Ascomycota (phylum), Dikarya (subkingdom), Fungi (kingdom), Opisthokonta (no rank), Eukaryota (superkingdom), cellular organisms (no rank)
C0NQA5_AJECG	HCBG_05693	A6R0T7	1.6e-14	no	KQVARACDWCRGHRIRCDNERPCANCRSRGGKCTSNGESELRTL	Fungal specific transcription factor domain-containing protein	Ajellomyces capsulatus (strain G186AR / H82 / ATCC MYA-2454 / RMSCC 2432) (Darling's disease fungus) (Histoplasma capsulatum)	Pathogen	Ajellomyces capsulatus (species), Histoplasma (genus), Ajellomycetaceae (family), Onygenales (order), Eurotiomycetidae (subclass), Eurotiomycetes (class), leotiomyceta (no rank), Pezizomycotina (subphylum), saccharomyceta (no rank), Ascomycota (phylum), Dikarya (subkingdom), Fungi (kingdom), Opisthokonta (no rank), Eukaryota (superkingdom), cellular organisms (no rank)
C0NT60_AJECG	HCBG_06340	A0A0H1BG81	9.5e-10	no	PRVPLSCGPCRARKSEVRLKCNRQQPCHNCISRGHDDLCVFANGKTPRSN	Fungal_trans domain-containing protein	Ajellomyces capsulatus (strain G186AR / H82 / ATCC MYA-2454 / RMSCC 2432) (Darling's disease fungus) (Histoplasma capsulatum)	Pathogen	Ajellomyces capsulatus (species), Histoplasma (genus), Ajellomycetaceae (family), Onygenales (order), Eurotiomycetidae (subclass), Eurotiomycetes (class), leotiomyceta (no rank), Pezizomycotina (subphylum), saccharomyceta (no rank), Ascomycota (phylum), Dikarya (subkingdom), Fungi (kingdom), Opisthokonta (no rank), Eukaryota (superkingdom), cellular organisms (no rank)
C0NTZ3_AJECG	HCBG_06623	F0ULK6	1.7e-11	no	VLTLACLNCRAKKIKCQPEDGGCKKCKKLGIPCPGPEVDERKrPS	Fungal_trans domain-containing protein	Ajellomyces capsulatus (strain G186AR / H82 / ATCC MYA-2454 / RMSCC 2432) (Darling's disease fungus) (Histoplasma capsulatum)	Pathogen	Ajellomyces capsulatus (species), Histoplasma (genus), Ajellomycetaceae (family), Onygenales (order), Eurotiomycetidae (subclass), Eurotiomycetes (class), leotiomyceta (no rank), Pezizomycotina (subphylum), saccharomyceta (no rank), Ascomycota (phylum), Dikarya (subkingdom), Fungi (kingdom), Opisthokonta (no rank), Eukaryota (superkingdom), cellular organisms (no rank)
C0NVI8_AJECG	HCBG_07168	T5C2D7	3.1e-14	no	ASRACETCHARKVRCDAASLGVPCTNCVAFSIECKIPTPKRKKHQGK	Fungal specific transcription factor domain-containing protein	Ajellomyces capsulatus (strain G186AR / H82 / ATCC MYA-2454 / RMSCC 2432) (Darling's disease fungus) (Histoplasma capsulatum)	Pathogen	Ajellomyces capsulatus (species), Histoplasma (genus), Ajellomycetaceae (family), Onygenales (order), Eurotiomycetidae (subclass), Eurotiomycetes (class), leotiomyceta (no rank), Pezizomycotina (subphylum), saccharomyceta (no rank), Ascomycota (phylum), Dikarya (subkingdom), Fungi (kingdom), Opisthokonta (no rank), Eukaryota (superkingdom), cellular organisms (no rank)
C0NXK6_AJECG	HCBG_08198	T5BYJ4	5.3e-15	no	LQSIACNECRLRKSKCSKERPTCSLCKQLKKECVYSPKVVRTPLT	Fungal specific transcription factor domain-containing protein	Ajellomyces capsulatus (strain G186AR / H82 / ATCC MYA-2454 / RMSCC 2432) (Darling's disease fungus) (Histoplasma capsulatum)	Pathogen	Ajellomyces capsulatus (species), Histoplasma (genus), Ajellomycetaceae (family), Onygenales (order), Eurotiomycetidae (subclass), Eurotiomycetes (class), leotiomyceta (no rank), Pezizomycotina (subphylum), saccharomyceta (no rank), Ascomycota (phylum), Dikarya (subkingdom), Fungi (kingdom), Opisthokonta (no rank), Eukaryota (superkingdom), cellular organisms (no rank)
C0NZ42_AJECG	HCBG_08422	F0UHJ6	3.4e-09	no	RIQACYPCYTRKQKCNRQYPCNHCSRRRRAEGCIYSG	Fungal_trans domain-containing protein	Ajellomyces capsulatus (strain G186AR / H82 / ATCC MYA-2454 / RMSCC 2432) (Darling's disease fungus) (Histoplasma capsulatum)	Pathogen	Ajellomyces capsulatus (species), Histoplasma (genus), Ajellomycetaceae (family), Onygenales (order), Eurotiomycetidae (subclass), Eurotiomycetes (class), leotiomyceta (no rank), Pezizomycotina (subphylum), saccharomyceta (no rank), Ascomycota (phylum), Dikarya (subkingdom), Fungi (kingdom), Opisthokonta (no rank), Eukaryota (superkingdom), cellular organisms (no rank)
C6H3M5_AJECH	HCDG_00036	F0UK25	1.4e-08	no	KNVSTTCTNCRERHLNAMRPVCSRCRADDRQCVFVLSRRGRRPS	C6 transcription factor	Ajellomyces capsulatus (strain H143) (Darling's disease fungus) (Histoplasma capsulatum)	Pathogen	Ajellomyces capsulatus (species), Histoplasma (genus), Ajellomycetaceae (family), Onygenales (order), Eurotiomycetidae (subclass), Eurotiomycetes (class), leotiomyceta (no rank), Pezizomycotina (subphylum), saccharomyceta (no rank), Ascomycota (phylum), Dikarya (subkingdom), Fungi (kingdom), Opisthokonta (no rank), Eukaryota (superkingdom), cellular organisms (no rank)
C6H5H2_AJECH	HCDG_00493	F0UHJ6	3.1e-09	no	RIQACYPCYTRKQKCNRQYPCNHCSRRRRAEGCIYTG	Fungal_trans domain-containing protein	Ajellomyces capsulatus (strain H143) (Darling's disease fungus) (Histoplasma capsulatum)	Pathogen	Ajellomyces capsulatus (species), Histoplasma (genus), Ajellomycetaceae (family), Onygenales (order), Eurotiomycetidae (subclass), Eurotiomycetes (class), leotiomyceta (no rank), Pezizomycotina (subphylum), saccharomyceta (no rank), Ascomycota (phylum), Dikarya (subkingdom), Fungi (kingdom), Opisthokonta (no rank), Eukaryota (superkingdom), cellular organisms (no rank)
C6H7V3_AJECH	HCDG_01514	A0A179UT22	7.5e-14	no	SASRACDNCRIRKIKCDRGSPCSNCRIAKSVCRTSPRVREQRQR	Fungal specific transcription factor	Ajellomyces capsulatus (strain H143) (Darling's disease fungus) (Histoplasma capsulatum)	Pathogen	Ajellomyces capsulatus (species), Histoplasma (genus), Ajellomycetaceae (family), Onygenales (order), Eurotiomycetidae (subclass), Eurotiomycetes (class), leotiomyceta (no rank), Pezizomycotina (subphylum), saccharomyceta (no rank), Ascomycota (phylum), Dikarya (subkingdom), Fungi (kingdom), Opisthokonta (no rank), Eukaryota (superkingdom), cellular organisms (no rank)
C6H698_AJECH	HCDG_01949	A0A0G2JAZ1	3e-09	no	RLVRSCSECSRRKQKCNRNWPCNNCAGSRAHLCRYDHTVKRCTPS	Fungal_trans domain-containing protein	Ajellomyces capsulatus (strain H143) (Darling's disease fungus) (Histoplasma capsulatum)	Pathogen	Ajellomyces capsulatus (species), Histoplasma (genus), Ajellomycetaceae (family), Onygenales (order), Eurotiomycetidae (subclass), Eurotiomycetes (class), leotiomyceta (no rank), Pezizomycotina (subphylum), saccharomyceta (no rank), Ascomycota (phylum), Dikarya (subkingdom), Fungi (kingdom), Opisthokonta (no rank), Eukaryota (superkingdom), cellular organisms (no rank)
C6H8H5_AJECH	HCDG_02506	T5BYJ4	3.3e-15	no	LQSVACNECRLRKSKCSKERPTCSLCKQLKKECVYSPKVVRTPLT	Fungal specific transcription factor	Ajellomyces capsulatus (strain H143) (Darling's disease fungus) (Histoplasma capsulatum)	Pathogen	Ajellomyces capsulatus (species), Histoplasma (genus), Ajellomycetaceae (family), Onygenales (order), Eurotiomycetidae (subclass), Eurotiomycetes (class), leotiomyceta (no rank), Pezizomycotina (subphylum), saccharomyceta (no rank), Ascomycota (phylum), Dikarya (subkingdom), Fungi (kingdom), Opisthokonta (no rank), Eukaryota (superkingdom), cellular organisms (no rank)
C6H8S9_AJECH	HCDG_02610	F0UA28	2.9e-14	no	RPAvSCALCRRRKIRCNRQTPCGNCVRSKSGHCVYGDEPLGTPLR	C6 zinc finger protein	Ajellomyces capsulatus (strain H143) (Darling's disease fungus) (Histoplasma capsulatum)	Pathogen	Ajellomyces capsulatus (species), Histoplasma (genus), Ajellomycetaceae (family), Onygenales (order), Eurotiomycetidae (subclass), Eurotiomycetes (class), leotiomyceta (no rank), Pezizomycotina (subphylum), saccharomyceta (no rank), Ascomycota (phylum), Dikarya (subkingdom), Fungi (kingdom), Opisthokonta (no rank), Eukaryota (superkingdom), cellular organisms (no rank)
C6HAM6_AJECH	HCDG_03257	C0NCC2	3.4e-14	no	SMPYSCVLCYQRKVKCDRHDPCSACINVGASCIFRAPPAPR	C6 transcription factor	Ajellomyces capsulatus (strain H143) (Darling's disease fungus) (Histoplasma capsulatum)	Pathogen	Ajellomyces capsulatus (species), Histoplasma (genus), Ajellomycetaceae (family), Onygenales (order), Eurotiomycetidae (subclass), Eurotiomycetes (class), leotiomyceta (no rank), Pezizomycotina (subphylum), saccharomyceta (no rank), Ascomycota (phylum), Dikarya (subkingdom), Fungi (kingdom), Opisthokonta (no rank), Eukaryota (superkingdom), cellular organisms (no rank)
C6HB82_AJECH	HCDG_03964	F0UDN6	2.4e-12	no	RKDPSCDACRERKVKCDASDSSSCTECSNRNVRCLFTKETNRRMSS	Fungal specific transcription factor	Ajellomyces capsulatus (strain H143) (Darling's disease fungus) (Histoplasma capsulatum)	Pathogen	Ajellomyces capsulatus (species), Histoplasma (genus), Ajellomycetaceae (family), Onygenales (order), Eurotiomycetidae (subclass), Eurotiomycetes (class), leotiomyceta (no rank), Pezizomycotina (subphylum), saccharomyceta (no rank), Ascomycota (phylum), Dikarya (subkingdom), Fungi (kingdom), Opisthokonta (no rank), Eukaryota (superkingdom), cellular organisms (no rank)
C6HFB2_AJECH	HCDG_04635	A0A0H1BG81	9.5e-10	no	PRVPLSCGPCRARKSEVRLKCNRQQPCHNCISRGHDDLCVFANGKTPRSN	C6 transcription factor	Ajellomyces capsulatus (strain H143) (Darling's disease fungus) (Histoplasma capsulatum)	Pathogen	Ajellomyces capsulatus (species), Histoplasma (genus), Ajellomycetaceae (family), Onygenales (order), Eurotiomycetidae (subclass), Eurotiomycetes (class), leotiomyceta (no rank), Pezizomycotina (subphylum), saccharomyceta (no rank), Ascomycota (phylum), Dikarya (subkingdom), Fungi (kingdom), Opisthokonta (no rank), Eukaryota (superkingdom), cellular organisms (no rank)
C6HFX2_AJECH	HCDG_05312	F2Q349	7.4e-16	no	AHTLTACTRCRQRKSRCDPGIPRCEPCQRSNAKCVYYDPARNRTI	Fungal specific transcription factor	Ajellomyces capsulatus (strain H143) (Darling's disease fungus) (Histoplasma capsulatum)	Pathogen	Ajellomyces capsulatus (species), Histoplasma (genus), Ajellomycetaceae (family), Onygenales (order), Eurotiomycetidae (subclass), Eurotiomycetes (class), leotiomyceta (no rank), Pezizomycotina (subphylum), saccharomyceta (no rank), Ascomycota (phylum), Dikarya (subkingdom), Fungi (kingdom), Opisthokonta (no rank), Eukaryota (superkingdom), cellular organisms (no rank)
C6HH39_AJECH	HCDG_05520	T5BB78	8.3e-10	no	AASACLACNMKKIRCIYPENSKECLNCSRNHWECsP	Fungal specific transcription factor	Ajellomyces capsulatus (strain H143) (Darling's disease fungus) (Histoplasma capsulatum)	Pathogen	Ajellomyces capsulatus (species), Histoplasma (genus), Ajellomycetaceae (family), Onygenales (order), Eurotiomycetidae (subclass), Eurotiomycetes (class), leotiomyceta (no rank), Pezizomycotina (subphylum), saccharomyceta (no rank), Ascomycota (phylum), Dikarya (subkingdom), Fungi (kingdom), Opisthokonta (no rank), Eukaryota (superkingdom), cellular organisms (no rank)
C6HHA7_AJECH	HCDG_05588	T5C2D7	3.1e-14	no	ASRACETCHARKVRCDAASLGVPCTNCVAFSIECKIPTPKRKKHQGK	Fungal specific transcription factor	Ajellomyces capsulatus (strain H143) (Darling's disease fungus) (Histoplasma capsulatum)	Pathogen	Ajellomyces capsulatus (species), Histoplasma (genus), Ajellomycetaceae (family), Onygenales (order), Eurotiomycetidae (subclass), Eurotiomycetes (class), leotiomyceta (no rank), Pezizomycotina (subphylum), saccharomyceta (no rank), Ascomycota (phylum), Dikarya (subkingdom), Fungi (kingdom), Opisthokonta (no rank), Eukaryota (superkingdom), cellular organisms (no rank)
C6HIL0_AJECH	HCDG_05894	A0A0H1B6Y8	2.4e-15	no	FRARACENCRLRKIKCDKAIPCSSCGTLGVTCHAASSRLTERPP	C6 transcription factor	Ajellomyces capsulatus (strain H143) (Darling's disease fungus) (Histoplasma capsulatum)	Pathogen	Ajellomyces capsulatus (species), Histoplasma (genus), Ajellomycetaceae (family), Onygenales (order), Eurotiomycetidae (subclass), Eurotiomycetes (class), leotiomyceta (no rank), Pezizomycotina (subphylum), saccharomyceta (no rank), Ascomycota (phylum), Dikarya (subkingdom), Fungi (kingdom), Opisthokonta (no rank), Eukaryota (superkingdom), cellular organisms (no rank)
C6HKX7_AJECH	HCDG_06858	T5BGI2	1.3e-14	no	RCVSTACIACRKRKSKCDGNTPTCAACASVYHTPCIYDPNSDHRRK	Nitrogen assimilation transcription factor nirA	Ajellomyces capsulatus (strain H143) (Darling's disease fungus) (Histoplasma capsulatum)	Pathogen	Ajellomyces capsulatus (species), Histoplasma (genus), Ajellomycetaceae (family), Onygenales (order), Eurotiomycetidae (subclass), Eurotiomycetes (class), leotiomyceta (no rank), Pezizomycotina (subphylum), saccharomyceta (no rank), Ascomycota (phylum), Dikarya (subkingdom), Fungi (kingdom), Opisthokonta (no rank), Eukaryota (superkingdom), cellular organisms (no rank)
C6HLF2_AJECH	HCDG_07033	F0UEI3	5e-06	no	SCVSCRDAELVLPCENCVKRNDAPSCTYAQPKFRKKT	C6 transcription factor	Ajellomyces capsulatus (strain H143) (Darling's disease fungus) (Histoplasma capsulatum)	Pathogen	Ajellomyces capsulatus (species), Histoplasma (genus), Ajellomycetaceae (family), Onygenales (order), Eurotiomycetidae (subclass), Eurotiomycetes (class), leotiomyceta (no rank), Pezizomycotina (subphylum), saccharomyceta (no rank), Ascomycota (phylum), Dikarya (subkingdom), Fungi (kingdom), Opisthokonta (no rank), Eukaryota (superkingdom), cellular organisms (no rank)
C6HNF8_AJECH	HCDG_07739	F0UFH6	4.7e-15	no	RKSAFSCEACRKRKVACGGANPSCSRCTARGETCVYSLTPTLSYTK	C6 transcription factor	Ajellomyces capsulatus (strain H143) (Darling's disease fungus) (Histoplasma capsulatum)	Pathogen	Ajellomyces capsulatus (species), Histoplasma (genus), Ajellomycetaceae (family), Onygenales (order), Eurotiomycetidae (subclass), Eurotiomycetes (class), leotiomyceta (no rank), Pezizomycotina (subphylum), saccharomyceta (no rank), Ascomycota (phylum), Dikarya (subkingdom), Fungi (kingdom), Opisthokonta (no rank), Eukaryota (superkingdom), cellular organisms (no rank)
C6HNG2_AJECH	HCDG_07743	A0A179UYI2	3.1e-15	no	ERPQLSCTTCRQKKLKCDRNLPCENCSTRGRGATCVYANPPPPGQT	C6 transcription factor	Ajellomyces capsulatus (strain H143) (Darling's disease fungus) (Histoplasma capsulatum)	Pathogen	Ajellomyces capsulatus (species), Histoplasma (genus), Ajellomycetaceae (family), Onygenales (order), Eurotiomycetidae (subclass), Eurotiomycetes (class), leotiomyceta (no rank), Pezizomycotina (subphylum), saccharomyceta (no rank), Ascomycota (phylum), Dikarya (subkingdom), Fungi (kingdom), Opisthokonta (no rank), Eukaryota (superkingdom), cellular organisms (no rank)
C6HNY8_AJECH	HCDG_07919	A0A0G2I0X1	4.3e-17	no	RVSHACDPCRKRKSKCDGLRPVCSRCRDQEITCVYLDGKREKLKR	Fungal_trans domain-containing protein	Ajellomyces capsulatus (strain H143) (Darling's disease fungus) (Histoplasma capsulatum)	Pathogen	Ajellomyces capsulatus (species), Histoplasma (genus), Ajellomycetaceae (family), Onygenales (order), Eurotiomycetidae (subclass), Eurotiomycetes (class), leotiomyceta (no rank), Pezizomycotina (subphylum), saccharomyceta (no rank), Ascomycota (phylum), Dikarya (subkingdom), Fungi (kingdom), Opisthokonta (no rank), Eukaryota (superkingdom), cellular organisms (no rank)
F0U4R0_AJEC8	HCEG_01369	A0A179UT22	7.5e-14	no	SASRACDNCRIRKIKCDRGSPCSNCRIAKSVCRTSPRVREQRQR	Fungal specific transcription factor domain-containing protein	Ajellomyces capsulatus (strain H88) (Darling's disease fungus) (Histoplasma capsulatum)	Pathogen	Ajellomyces capsulatus (species), Histoplasma (genus), Ajellomycetaceae (family), Onygenales (order), Eurotiomycetidae (subclass), Eurotiomycetes (class), leotiomyceta (no rank), Pezizomycotina (subphylum), saccharomyceta (no rank), Ascomycota (phylum), Dikarya (subkingdom), Fungi (kingdom), Opisthokonta (no rank), Eukaryota (superkingdom), cellular organisms (no rank)
F0UDG5_AJEC8	HCEG_01921	A0A179UXK7	3.3e-15	no	LQSVACNECRLRKSKCSKERPTCSLCKQLKKECVYSPKVVRTPLT	Fungal specific transcription factor domain-containing protein	Ajellomyces capsulatus (strain H88) (Darling's disease fungus) (Histoplasma capsulatum)	Pathogen	Ajellomyces capsulatus (species), Histoplasma (genus), Ajellomycetaceae (family), Onygenales (order), Eurotiomycetidae (subclass), Eurotiomycetes (class), leotiomyceta (no rank), Pezizomycotina (subphylum), saccharomyceta (no rank), Ascomycota (phylum), Dikarya (subkingdom), Fungi (kingdom), Opisthokonta (no rank), Eukaryota (superkingdom), cellular organisms (no rank)
F0UCK7_AJEC8	HCEG_02498	A0A0H1B6Y8	2.4e-15	no	FRARACENCRLRKIKCDKAIPCSSCGTLGVTCHAASSRLTERPP	C6 transcription factor	Ajellomyces capsulatus (strain H88) (Darling's disease fungus) (Histoplasma capsulatum)	Pathogen	Ajellomyces capsulatus (species), Histoplasma (genus), Ajellomycetaceae (family), Onygenales (order), Eurotiomycetidae (subclass), Eurotiomycetes (class), leotiomyceta (no rank), Pezizomycotina (subphylum), saccharomyceta (no rank), Ascomycota (phylum), Dikarya (subkingdom), Fungi (kingdom), Opisthokonta (no rank), Eukaryota (superkingdom), cellular organisms (no rank)
F0UFI0_AJEC8	HCEG_03355	A0A179UYI2	3.1e-15	no	ERPQLSCTTCRQKKLKCDRNLPCENCSTRGRGATCVYANPPPPGQT	C6 transcription factor	Ajellomyces capsulatus (strain H88) (Darling's disease fungus) (Histoplasma capsulatum)	Pathogen	Ajellomyces capsulatus (species), Histoplasma (genus), Ajellomycetaceae (family), Onygenales (order), Eurotiomycetidae (subclass), Eurotiomycetes (class), leotiomyceta (no rank), Pezizomycotina (subphylum), saccharomyceta (no rank), Ascomycota (phylum), Dikarya (subkingdom), Fungi (kingdom), Opisthokonta (no rank), Eukaryota (superkingdom), cellular organisms (no rank)
F0UGG3_AJEC8	HCEG_03531	A0A0G2I0X1	4.3e-17	no	RVSHACDPCRKRKSKCDGLRPVCSRCRDQEITCVYLDGKREKLKR	Fungal_trans domain-containing protein	Ajellomyces capsulatus (strain H88) (Darling's disease fungus) (Histoplasma capsulatum)	Pathogen	Ajellomyces capsulatus (species), Histoplasma (genus), Ajellomycetaceae (family), Onygenales (order), Eurotiomycetidae (subclass), Eurotiomycetes (class), leotiomyceta (no rank), Pezizomycotina (subphylum), saccharomyceta (no rank), Ascomycota (phylum), Dikarya (subkingdom), Fungi (kingdom), Opisthokonta (no rank), Eukaryota (superkingdom), cellular organisms (no rank)
F0UE21_AJEC8	HCEG_03766	T5BGI2	1.3e-14	no	RCVSTACIACRKRKSKCDGNTPTCAACASVYHTPCIYDPNSDHRRK	Nitrogen assimilation transcription factor nirA	Ajellomyces capsulatus (strain H88) (Darling's disease fungus) (Histoplasma capsulatum)	Pathogen	Ajellomyces capsulatus (species), Histoplasma (genus), Ajellomycetaceae (family), Onygenales (order), Eurotiomycetidae (subclass), Eurotiomycetes (class), leotiomyceta (no rank), Pezizomycotina (subphylum), saccharomyceta (no rank), Ascomycota (phylum), Dikarya (subkingdom), Fungi (kingdom), Opisthokonta (no rank), Eukaryota (superkingdom), cellular organisms (no rank)
F0UKH6_AJEC8	HCEG_05145	W9HM91	1.9e-17	no	RTLLACDFCRQrKRRCDGSKPVCGNCSEAEAECRYQELPIqRLD	Fungal_trans domain-containing protein	Ajellomyces capsulatus (strain H88) (Darling's disease fungus) (Histoplasma capsulatum)	Pathogen	Ajellomyces capsulatus (species), Histoplasma (genus), Ajellomycetaceae (family), Onygenales (order), Eurotiomycetidae (subclass), Eurotiomycetes (class), leotiomyceta (no rank), Pezizomycotina (subphylum), saccharomyceta (no rank), Ascomycota (phylum), Dikarya (subkingdom), Fungi (kingdom), Opisthokonta (no rank), Eukaryota (superkingdom), cellular organisms (no rank)
F0UHT3_AJEC8	HCEG_05507	C0NCC2	5.8e-14	no	SMPYSCVLCYQRKVKCDRHDPCSACINAGASCIFRAPPAPR	C6 zinc finger domain-containing protein	Ajellomyces capsulatus (strain H88) (Darling's disease fungus) (Histoplasma capsulatum)	Pathogen	Ajellomyces capsulatus (species), Histoplasma (genus), Ajellomycetaceae (family), Onygenales (order), Eurotiomycetidae (subclass), Eurotiomycetes (class), leotiomyceta (no rank), Pezizomycotina (subphylum), saccharomyceta (no rank), Ascomycota (phylum), Dikarya (subkingdom), Fungi (kingdom), Opisthokonta (no rank), Eukaryota (superkingdom), cellular organisms (no rank)
F0UP10_AJEC8	HCEG_06084	A0A0H1BG81	9.5e-10	no	PRVPLSCGPCRARKSEVRLKCNRQQPCHNCISRGHDDLCVFANGKTPRSN	C6 transcription factor	Ajellomyces capsulatus (strain H88) (Darling's disease fungus) (Histoplasma capsulatum)	Pathogen	Ajellomyces capsulatus (species), Histoplasma (genus), Ajellomycetaceae (family), Onygenales (order), Eurotiomycetidae (subclass), Eurotiomycetes (class), leotiomyceta (no rank), Pezizomycotina (subphylum), saccharomyceta (no rank), Ascomycota (phylum), Dikarya (subkingdom), Fungi (kingdom), Opisthokonta (no rank), Eukaryota (superkingdom), cellular organisms (no rank)
F0UMM6_AJEC8	HCEG_06558	A0A0G2I4E2	7.4e-16	no	AHTLTACTRCRQRKSRCDPGIPRCEPCQRSNAKCVYYDPARNRTI	Fungal specific transcription factor domain-containing protein	Ajellomyces capsulatus (strain H88) (Darling's disease fungus) (Histoplasma capsulatum)	Pathogen	Ajellomyces capsulatus (species), Histoplasma (genus), Ajellomycetaceae (family), Onygenales (order), Eurotiomycetidae (subclass), Eurotiomycetes (class), leotiomyceta (no rank), Pezizomycotina (subphylum), saccharomyceta (no rank), Ascomycota (phylum), Dikarya (subkingdom), Fungi (kingdom), Opisthokonta (no rank), Eukaryota (superkingdom), cellular organisms (no rank)
F0UPW7_AJEC8	HCEG_07077	C0NYI5	2.8e-13	no	TITtSCELCRTRKVKCDRAEPSCGWCTRNSRVCVYRERQRPGFRS	C6 transcription factor	Ajellomyces capsulatus (strain H88) (Darling's disease fungus) (Histoplasma capsulatum)	Pathogen	Ajellomyces capsulatus (species), Histoplasma (genus), Ajellomycetaceae (family), Onygenales (order), Eurotiomycetidae (subclass), Eurotiomycetes (class), leotiomyceta (no rank), Pezizomycotina (subphylum), saccharomyceta (no rank), Ascomycota (phylum), Dikarya (subkingdom), Fungi (kingdom), Opisthokonta (no rank), Eukaryota (superkingdom), cellular organisms (no rank)
F0URR9_AJEC8	HCEG_07811	T5C2D7	3.1e-14	no	ASRACETCHARKVRCDAASLGVPCTNCVAFSIECKIPTPKRKKHQGK	Fungal specific transcription factor domain-containing protein	Ajellomyces capsulatus (strain H88) (Darling's disease fungus) (Histoplasma capsulatum)	Pathogen	Ajellomyces capsulatus (species), Histoplasma (genus), Ajellomycetaceae (family), Onygenales (order), Eurotiomycetidae (subclass), Eurotiomycetes (class), leotiomyceta (no rank), Pezizomycotina (subphylum), saccharomyceta (no rank), Ascomycota (phylum), Dikarya (subkingdom), Fungi (kingdom), Opisthokonta (no rank), Eukaryota (superkingdom), cellular organisms (no rank)
F0URX7_AJEC8	HCEG_07869	T5BB78	8.3e-10	no	AASACLACNMKKIRCIYPENSKECLNCSRNHWECsP	Fungal specific transcription factor domain-containing protein	Ajellomyces capsulatus (strain H88) (Darling's disease fungus) (Histoplasma capsulatum)	Pathogen	Ajellomyces capsulatus (species), Histoplasma (genus), Ajellomycetaceae (family), Onygenales (order), Eurotiomycetidae (subclass), Eurotiomycetes (class), leotiomyceta (no rank), Pezizomycotina (subphylum), saccharomyceta (no rank), Ascomycota (phylum), Dikarya (subkingdom), Fungi (kingdom), Opisthokonta (no rank), Eukaryota (superkingdom), cellular organisms (no rank)
F0UTA0_AJEC8	HCEG_08342	A6R0T7	1.6e-14	no	KQVARACDWCRGHRIRCDNERPCANCRSRGGKCTSNGESELRTL	Fungal specific transcription factor domain-containing protein	Ajellomyces capsulatus (strain H88) (Darling's disease fungus) (Histoplasma capsulatum)	Pathogen	Ajellomyces capsulatus (species), Histoplasma (genus), Ajellomycetaceae (family), Onygenales (order), Eurotiomycetidae (subclass), Eurotiomycetes (class), leotiomyceta (no rank), Pezizomycotina (subphylum), saccharomyceta (no rank), Ascomycota (phylum), Dikarya (subkingdom), Fungi (kingdom), Opisthokonta (no rank), Eukaryota (superkingdom), cellular organisms (no rank)
F0UVA1_AJEC8	HCEG_09043	A0A0G2JAZ1	3e-09	no	RLVRSCSECSRRKQKCNRNWPCNNCAGSRAHLCRYDHTVKRCTPS	Fungal_trans domain-containing protein	Ajellomyces capsulatus (strain H88) (Darling's disease fungus) (Histoplasma capsulatum)	Pathogen	Ajellomyces capsulatus (species), Histoplasma (genus), Ajellomycetaceae (family), Onygenales (order), Eurotiomycetidae (subclass), Eurotiomycetes (class), leotiomyceta (no rank), Pezizomycotina (subphylum), saccharomyceta (no rank), Ascomycota (phylum), Dikarya (subkingdom), Fungi (kingdom), Opisthokonta (no rank), Eukaryota (superkingdom), cellular organisms (no rank)
A6QSI7_AJECN	HCAG_00343	A0A0H1BG81	1.3e-09	no	PRVPLSCGPCRARKSEVRLKCNRQQPCHNCVSRGHDDLCVFANGKTPRSN	Fungal_trans domain-containing protein	Ajellomyces capsulatus (strain NAm1 / WU24) (Darling's disease fungus) (Histoplasma capsulatum)	Pathogen	unclassified Histoplasma (no rank), Histoplasma (genus), Ajellomycetaceae (family), Onygenales (order), Eurotiomycetidae (subclass), Eurotiomycetes (class), leotiomyceta (no rank), Pezizomycotina (subphylum), saccharomyceta (no rank), Ascomycota (phylum), Dikarya (subkingdom), Fungi (kingdom), Opisthokonta (no rank), Eukaryota (superkingdom), cellular organisms (no rank)
A6QSV9_AJECN	HCAG_00465	C0NTG7	1.3e-12	no	RLAQACFTCRDKKIKCIPNIPKCDQCQKSGRECRFENsPRGNQIA	Fungal_trans domain-containing protein	Ajellomyces capsulatus (strain NAm1 / WU24) (Darling's disease fungus) (Histoplasma capsulatum)	Pathogen	unclassified Histoplasma (no rank), Histoplasma (genus), Ajellomycetaceae (family), Onygenales (order), Eurotiomycetidae (subclass), Eurotiomycetes (class), leotiomyceta (no rank), Pezizomycotina (subphylum), saccharomyceta (no rank), Ascomycota (phylum), Dikarya (subkingdom), Fungi (kingdom), Opisthokonta (no rank), Eukaryota (superkingdom), cellular organisms (no rank)
A6QTD8_AJECN	HCAG_00644	F0ULK6	1.7e-11	no	VLTLACLNCRAKKIKCQPEDGGCKKCKKLGIPCPGPEVDERKrPS	Fungal_trans domain-containing protein	Ajellomyces capsulatus (strain NAm1 / WU24) (Darling's disease fungus) (Histoplasma capsulatum)	Pathogen	unclassified Histoplasma (no rank), Histoplasma (genus), Ajellomycetaceae (family), Onygenales (order), Eurotiomycetidae (subclass), Eurotiomycetes (class), leotiomyceta (no rank), Pezizomycotina (subphylum), saccharomyceta (no rank), Ascomycota (phylum), Dikarya (subkingdom), Fungi (kingdom), Opisthokonta (no rank), Eukaryota (superkingdom), cellular organisms (no rank)
A6QU83_AJECN	HCAG_00939	C6HMC3	2.5e-09	no	ASIACSRCRRSKIKGVNAGIDNTCQTCESSGRECSYPIPAPGGGTG	Fungal_trans domain-containing protein	Ajellomyces capsulatus (strain NAm1 / WU24) (Darling's disease fungus) (Histoplasma capsulatum)	Pathogen	unclassified Histoplasma (no rank), Histoplasma (genus), Ajellomycetaceae (family), Onygenales (order), Eurotiomycetidae (subclass), Eurotiomycetes (class), leotiomyceta (no rank), Pezizomycotina (subphylum), saccharomyceta (no rank), Ascomycota (phylum), Dikarya (subkingdom), Fungi (kingdom), Opisthokonta (no rank), Eukaryota (superkingdom), cellular organisms (no rank)
A6QWS6_AJECN	HCAG_01833	A0A179UAE7	2e-13	no	RALRCSNCQLKHIRCDAAQPVCSTCLQKDRICQYPQSSPAAAK	KR domain-containing protein	Ajellomyces capsulatus (strain NAm1 / WU24) (Darling's disease fungus) (Histoplasma capsulatum)	Pathogen	unclassified Histoplasma (no rank), Histoplasma (genus), Ajellomycetaceae (family), Onygenales (order), Eurotiomycetidae (subclass), Eurotiomycetes (class), leotiomyceta (no rank), Pezizomycotina (subphylum), saccharomyceta (no rank), Ascomycota (phylum), Dikarya (subkingdom), Fungi (kingdom), Opisthokonta (no rank), Eukaryota (superkingdom), cellular organisms (no rank)
A6R4D2_AJECN	HCAG_04490	A0A0P7BGB3	3.4e-17	no	RTLLACDFCRQrKRRCDGSKPVCGNCSEAEAECRYQELPIQsLES	Fungal_trans domain-containing protein	Ajellomyces capsulatus (strain NAm1 / WU24) (Darling's disease fungus) (Histoplasma capsulatum)	Pathogen	unclassified Histoplasma (no rank), Histoplasma (genus), Ajellomycetaceae (family), Onygenales (order), Eurotiomycetidae (subclass), Eurotiomycetes (class), leotiomyceta (no rank), Pezizomycotina (subphylum), saccharomyceta (no rank), Ascomycota (phylum), Dikarya (subkingdom), Fungi (kingdom), Opisthokonta (no rank), Eukaryota (superkingdom), cellular organisms (no rank)
A6R650_AJECN	HCAG_05108	A0A0G2JAZ1	3e-09	no	RLVRSCSECSRRKQKCNRNWPCNNCAGSRAHLCRYDHTVKRCTPS	Fungal_trans domain-containing protein	Ajellomyces capsulatus (strain NAm1 / WU24) (Darling's disease fungus) (Histoplasma capsulatum)	Pathogen	unclassified Histoplasma (no rank), Histoplasma (genus), Ajellomycetaceae (family), Onygenales (order), Eurotiomycetidae (subclass), Eurotiomycetes (class), leotiomyceta (no rank), Pezizomycotina (subphylum), saccharomyceta (no rank), Ascomycota (phylum), Dikarya (subkingdom), Fungi (kingdom), Opisthokonta (no rank), Eukaryota (superkingdom), cellular organisms (no rank)
A6RB52_AJECN	HCAG_06190	C0NML8	4.1e-13	no	ACQRCHSRRVKCNAADSGIPCTNCEQARSSCRLIESKRGRK	Fungal_trans domain-containing protein	Ajellomyces capsulatus (strain NAm1 / WU24) (Darling's disease fungus) (Histoplasma capsulatum)	Pathogen	unclassified Histoplasma (no rank), Histoplasma (genus), Ajellomycetaceae (family), Onygenales (order), Eurotiomycetidae (subclass), Eurotiomycetes (class), leotiomyceta (no rank), Pezizomycotina (subphylum), saccharomyceta (no rank), Ascomycota (phylum), Dikarya (subkingdom), Fungi (kingdom), Opisthokonta (no rank), Eukaryota (superkingdom), cellular organisms (no rank)
A6R8Z1_AJECN	HCAG_06782	F0UDN6	2.4e-12	no	RKDPSCDACRERKVKCDASDSSSCTECSNRNVRCLFTKETNRRMSS	Fungal_trans domain-containing protein	Ajellomyces capsulatus (strain NAm1 / WU24) (Darling's disease fungus) (Histoplasma capsulatum)	Pathogen	unclassified Histoplasma (no rank), Histoplasma (genus), Ajellomycetaceae (family), Onygenales (order), Eurotiomycetidae (subclass), Eurotiomycetes (class), leotiomyceta (no rank), Pezizomycotina (subphylum), saccharomyceta (no rank), Ascomycota (phylum), Dikarya (subkingdom), Fungi (kingdom), Opisthokonta (no rank), Eukaryota (superkingdom), cellular organisms (no rank)
A6RDV9_AJECN	HCAG_07817	F2TGQ1	2.7e-14	no	LQSIACNECRLRKSKCSKERPTCSLCKQLKRECVYSPKVVRTPLT	Fungal_trans domain-containing protein	Ajellomyces capsulatus (strain NAm1 / WU24) (Darling's disease fungus) (Histoplasma capsulatum)	Pathogen	unclassified Histoplasma (no rank), Histoplasma (genus), Ajellomycetaceae (family), Onygenales (order), Eurotiomycetidae (subclass), Eurotiomycetes (class), leotiomyceta (no rank), Pezizomycotina (subphylum), saccharomyceta (no rank), Ascomycota (phylum), Dikarya (subkingdom), Fungi (kingdom), Opisthokonta (no rank), Eukaryota (superkingdom), cellular organisms (no rank)
A6REG9_AJECN	HCAG_08034	T5C4S5	7.2e-13	no	RQRASRACETCHARRFRCDAASLGVPCTNCVAFSIECKIPTPKRKKH	Cutinase transcription factor 1 alpha	Ajellomyces capsulatus (strain NAm1 / WU24) (Darling's disease fungus) (Histoplasma capsulatum)	Pathogen	unclassified Histoplasma (no rank), Histoplasma (genus), Ajellomycetaceae (family), Onygenales (order), Eurotiomycetidae (subclass), Eurotiomycetes (class), leotiomyceta (no rank), Pezizomycotina (subphylum), saccharomyceta (no rank), Ascomycota (phylum), Dikarya (subkingdom), Fungi (kingdom), Opisthokonta (no rank), Eukaryota (superkingdom), cellular organisms (no rank)
A6REU7_AJECN	HCAG_08162	C0P027	7.1e-10	no	RRASKACCCCRARKVRCDVVENGSPCTNCRLDEVKCVVTESKRRK	Fungal_trans domain-containing protein	Ajellomyces capsulatus (strain NAm1 / WU24) (Darling's disease fungus) (Histoplasma capsulatum)	Pathogen	unclassified Histoplasma (no rank), Histoplasma (genus), Ajellomycetaceae (family), Onygenales (order), Eurotiomycetidae (subclass), Eurotiomycetes (class), leotiomyceta (no rank), Pezizomycotina (subphylum), saccharomyceta (no rank), Ascomycota (phylum), Dikarya (subkingdom), Fungi (kingdom), Opisthokonta (no rank), Eukaryota (superkingdom), cellular organisms (no rank)
A6RH37_AJECN	HCAG_08954	A0A179UT22	1.4e-11	no	PSASRACDNCRIRKIKCDRGSLCSNCRIAKSVCRTSPRVR	Fungal_trans domain-containing protein	Ajellomyces capsulatus (strain NAm1 / WU24) (Darling's disease fungus) (Histoplasma capsulatum)	Pathogen	unclassified Histoplasma (no rank), Histoplasma (genus), Ajellomycetaceae (family), Onygenales (order), Eurotiomycetidae (subclass), Eurotiomycetes (class), leotiomyceta (no rank), Pezizomycotina (subphylum), saccharomyceta (no rank), Ascomycota (phylum), Dikarya (subkingdom), Fungi (kingdom), Opisthokonta (no rank), Eukaryota (superkingdom), cellular organisms (no rank)
F2T2Q8_AJEDA	BDDG_00105	A0A0H1BNA0	1.2e-07	no	VSCILCRKRKVRYCRQQPCSSCTR	Fungal_trans domain-containing protein	Ajellomyces dermatitidis (strain ATCC 18188 / CBS 674.68) (Blastomyces dermatitidis)	Pathogen	Ajellomyces dermatitidis (species), Blastomyces (genus), Ajellomycetaceae (family), Onygenales (order), Eurotiomycetidae (subclass), Eurotiomycetes (class), leotiomyceta (no rank), Pezizomycotina (subphylum), saccharomyceta (no rank), Ascomycota (phylum), Dikarya (subkingdom), Fungi (kingdom), Opisthokonta (no rank), Eukaryota (superkingdom), cellular organisms (no rank)
F2T1Y6_AJEDA	BDDG_00407	T5CA84	1.6e-11	no	KRARLVCLRCHEKRIKCDLQINNSECESPRCSRCEVAGYECRIRPSKRGAGN	C6 transcription factor	Ajellomyces dermatitidis (strain ATCC 18188 / CBS 674.68) (Blastomyces dermatitidis)	Pathogen	Ajellomyces dermatitidis (species), Blastomyces (genus), Ajellomycetaceae (family), Onygenales (order), Eurotiomycetidae (subclass), Eurotiomycetes (class), leotiomyceta (no rank), Pezizomycotina (subphylum), saccharomyceta (no rank), Ascomycota (phylum), Dikarya (subkingdom), Fungi (kingdom), Opisthokonta (no rank), Eukaryota (superkingdom), cellular organisms (no rank)
F2T5S2_AJEDA	BDDG_01522	A0A0G2HPF0	2.6e-13	no	RQGAKACTNCHNKKVRCDLPTANGACSNCQSLNQECRPHIRKRRRRV	C6 transcription factor	Ajellomyces dermatitidis (strain ATCC 18188 / CBS 674.68) (Blastomyces dermatitidis)	Pathogen	Ajellomyces dermatitidis (species), Blastomyces (genus), Ajellomycetaceae (family), Onygenales (order), Eurotiomycetidae (subclass), Eurotiomycetes (class), leotiomyceta (no rank), Pezizomycotina (subphylum), saccharomyceta (no rank), Ascomycota (phylum), Dikarya (subkingdom), Fungi (kingdom), Opisthokonta (no rank), Eukaryota (superkingdom), cellular organisms (no rank)
A0A0J9EKH4_AJEDA	BDDG_02016	A0A179TWN6	2.6e-12	yes	RARMACTWCHERKVRCDVSIHGSPCTNCRLDGHECTIRSSACRgRGV	FarB protein, variant	Ajellomyces dermatitidis (strain ATCC 18188 / CBS 674.68) (Blastomyces dermatitidis)	Pathogen	Ajellomyces dermatitidis (species), Blastomyces (genus), Ajellomycetaceae (family), Onygenales (order), Eurotiomycetidae (subclass), Eurotiomycetes (class), leotiomyceta (no rank), Pezizomycotina (subphylum), saccharomyceta (no rank), Ascomycota (phylum), Dikarya (subkingdom), Fungi (kingdom), Opisthokonta (no rank), Eukaryota (superkingdom), cellular organisms (no rank)
A0A0J9EM44_AJEDA	BDDG_02902	F2T9P8	2.4e-12	no	RKDPSCDACRERKVKCDASDSSSCTECSNRNVRCLFTKETNRRMSS	Fungal_trans domain-containing protein	Ajellomyces dermatitidis (strain ATCC 18188 / CBS 674.68) (Blastomyces dermatitidis)	Pathogen	Ajellomyces dermatitidis (species), Blastomyces (genus), Ajellomycetaceae (family), Onygenales (order), Eurotiomycetidae (subclass), Eurotiomycetes (class), leotiomyceta (no rank), Pezizomycotina (subphylum), saccharomyceta (no rank), Ascomycota (phylum), Dikarya (subkingdom), Fungi (kingdom), Opisthokonta (no rank), Eukaryota (superkingdom), cellular organisms (no rank)
A0A0J9ETN9_AJEDA	BDDG_08031	F2TPC3	1.4e-14	yes	QRVTQACGPCRQRKSKCPGDKPVCRQCLELNISCYYTYGKREMAE	Fungal specific transcription factor domain-containing protein, variant	Ajellomyces dermatitidis (strain ATCC 18188 / CBS 674.68) (Blastomyces dermatitidis)	Pathogen	Ajellomyces dermatitidis (species), Blastomyces (genus), Ajellomycetaceae (family), Onygenales (order), Eurotiomycetidae (subclass), Eurotiomycetes (class), leotiomyceta (no rank), Pezizomycotina (subphylum), saccharomyceta (no rank), Ascomycota (phylum), Dikarya (subkingdom), Fungi (kingdom), Opisthokonta (no rank), Eukaryota (superkingdom), cellular organisms (no rank)
A0A0J9ERN6_AJEDA	BDDG_08655	T5B6Y3	7.8e-13	no	YISLAcNECKRRKIKCNGQVPCQRCGHLSLEcLYAPNCCTRSIK	Fungal_trans domain-containing protein	Ajellomyces dermatitidis (strain ATCC 18188 / CBS 674.68) (Blastomyces dermatitidis)	Pathogen	Ajellomyces dermatitidis (species), Blastomyces (genus), Ajellomycetaceae (family), Onygenales (order), Eurotiomycetidae (subclass), Eurotiomycetes (class), leotiomyceta (no rank), Pezizomycotina (subphylum), saccharomyceta (no rank), Ascomycota (phylum), Dikarya (subkingdom), Fungi (kingdom), Opisthokonta (no rank), Eukaryota (superkingdom), cellular organisms (no rank)
A0A0J9EUQ6_AJEDA	BDDG_13126	A0A0H1B729	1.2e-06	no	SHSHPACLACRKRKSGIPRTAADSCAMCKVHETECLFPQQKHKISS	Fungal_trans domain-containing protein	Ajellomyces dermatitidis (strain ATCC 18188 / CBS 674.68) (Blastomyces dermatitidis)	Pathogen	Ajellomyces dermatitidis (species), Blastomyces (genus), Ajellomycetaceae (family), Onygenales (order), Eurotiomycetidae (subclass), Eurotiomycetes (class), leotiomyceta (no rank), Pezizomycotina (subphylum), saccharomyceta (no rank), Ascomycota (phylum), Dikarya (subkingdom), Fungi (kingdom), Opisthokonta (no rank), Eukaryota (superkingdom), cellular organisms (no rank)
A0A179TX23_AJEDR	BDCG_00348	C5G9E2	7.8e-13	no	YISLAcNECKRRKIKCNGQVPCQRCGHLSLEcLYAPNCCTRSIK	Fungal specific transcription factor, variant	Ajellomyces dermatitidis (strain ER-3 / ATCC MYA-2586) (Blastomyces dermatitidis)	Pathogen	Ajellomyces dermatitidis (species), Blastomyces (genus), Ajellomycetaceae (family), Onygenales (order), Eurotiomycetidae (subclass), Eurotiomycetes (class), leotiomyceta (no rank), Pezizomycotina (subphylum), saccharomyceta (no rank), Ascomycota (phylum), Dikarya (subkingdom), Fungi (kingdom), Opisthokonta (no rank), Eukaryota (superkingdom), cellular organisms (no rank)
A0A179TZT4_AJEDR	BDCG_00942	T5BXF2	2.4e-12	no	RKDPSCDACRERKVKCDASDSSSCTECSNRNVRCLFTKETNRRMSS	Fungal specific transcription factor domain-containing protein, variant	Ajellomyces dermatitidis (strain ER-3 / ATCC MYA-2586) (Blastomyces dermatitidis)	Pathogen	Ajellomyces dermatitidis (species), Blastomyces (genus), Ajellomycetaceae (family), Onygenales (order), Eurotiomycetidae (subclass), Eurotiomycetes (class), leotiomyceta (no rank), Pezizomycotina (subphylum), saccharomyceta (no rank), Ascomycota (phylum), Dikarya (subkingdom), Fungi (kingdom), Opisthokonta (no rank), Eukaryota (superkingdom), cellular organisms (no rank)
A0A179TZZ3_AJEDR	BDCG_01105	A0A179UFE4	1.4e-14	yes	QRVTQACGPCRQRKSKCPGDKPVCRQCLELNISCYYTYGKREMAE	Fungal specific transcription factor domain-containing protein, variant 1 (Fungal specific transcription factor domain-containing protein, variant 2)	Ajellomyces dermatitidis (strain ER-3 / ATCC MYA-2586) (Blastomyces dermatitidis)	Pathogen	Ajellomyces dermatitidis (species), Blastomyces (genus), Ajellomycetaceae (family), Onygenales (order), Eurotiomycetidae (subclass), Eurotiomycetes (class), leotiomyceta (no rank), Pezizomycotina (subphylum), saccharomyceta (no rank), Ascomycota (phylum), Dikarya (subkingdom), Fungi (kingdom), Opisthokonta (no rank), Eukaryota (superkingdom), cellular organisms (no rank)
A0A179TZA3_AJEDR	BDCG_01652	A0A179TWN6	2.6e-12	yes	RARMACTWCHERKVRCDVSIHGSPCTNCRLDGHECTIRSSACRgRGV	FarB protein, variant	Ajellomyces dermatitidis (strain ER-3 / ATCC MYA-2586) (Blastomyces dermatitidis)	Pathogen	Ajellomyces dermatitidis (species), Blastomyces (genus), Ajellomycetaceae (family), Onygenales (order), Eurotiomycetidae (subclass), Eurotiomycetes (class), leotiomyceta (no rank), Pezizomycotina (subphylum), saccharomyceta (no rank), Ascomycota (phylum), Dikarya (subkingdom), Fungi (kingdom), Opisthokonta (no rank), Eukaryota (superkingdom), cellular organisms (no rank)
A0A179TZI8_AJEDR	BDCG_01844	F2TLZ8	4.9e-13	no	PVKRACNECRQQKLRCDVIQEPFTTCSRCRRLKLECKIESNFKRIGKR	Zn(II)2Cys6 transcriptional activator	Ajellomyces dermatitidis (strain ER-3 / ATCC MYA-2586) (Blastomyces dermatitidis)	Pathogen	Ajellomyces dermatitidis (species), Blastomyces (genus), Ajellomycetaceae (family), Onygenales (order), Eurotiomycetidae (subclass), Eurotiomycetes (class), leotiomyceta (no rank), Pezizomycotina (subphylum), saccharomyceta (no rank), Ascomycota (phylum), Dikarya (subkingdom), Fungi (kingdom), Opisthokonta (no rank), Eukaryota (superkingdom), cellular organisms (no rank)
A0A179TZJ1_AJEDR	BDCG_03783	A0A0H1BNA0	1.7e-14	no	VSCILCRKRKIRCNRQTPCSNCVRSKNSACIYGNDLAET	Fungal_trans domain-containing protein	Ajellomyces dermatitidis (strain ER-3 / ATCC MYA-2586) (Blastomyces dermatitidis)	Pathogen	Ajellomyces dermatitidis (species), Blastomyces (genus), Ajellomycetaceae (family), Onygenales (order), Eurotiomycetidae (subclass), Eurotiomycetes (class), leotiomyceta (no rank), Pezizomycotina (subphylum), saccharomyceta (no rank), Ascomycota (phylum), Dikarya (subkingdom), Fungi (kingdom), Opisthokonta (no rank), Eukaryota (superkingdom), cellular organisms (no rank)
C5GI80_AJEDR	BDCG_04466	A0A0H1B729	1.2e-06	no	SHSHPACLACRKRKSGIPRTAADSCAMCKVHETECLFPQQKHKISS	C6 transcription factor	Ajellomyces dermatitidis (strain ER-3 / ATCC MYA-2586) (Blastomyces dermatitidis)	Pathogen	Ajellomyces dermatitidis (species), Blastomyces (genus), Ajellomycetaceae (family), Onygenales (order), Eurotiomycetidae (subclass), Eurotiomycetes (class), leotiomyceta (no rank), Pezizomycotina (subphylum), saccharomyceta (no rank), Ascomycota (phylum), Dikarya (subkingdom), Fungi (kingdom), Opisthokonta (no rank), Eukaryota (superkingdom), cellular organisms (no rank)
A0A179U431_AJEDR	BDCG_06739	A0A179U443	2.6e-09	yes	RLVRSCSECSRRKQKCNRNWPCNNCAGSRAHLCRYDHTIKRCTSS	Fungal_trans domain-containing protein	Ajellomyces dermatitidis (strain ER-3 / ATCC MYA-2586) (Blastomyces dermatitidis)	Pathogen	Ajellomyces dermatitidis (species), Blastomyces (genus), Ajellomycetaceae (family), Onygenales (order), Eurotiomycetidae (subclass), Eurotiomycetes (class), leotiomyceta (no rank), Pezizomycotina (subphylum), saccharomyceta (no rank), Ascomycota (phylum), Dikarya (subkingdom), Fungi (kingdom), Opisthokonta (no rank), Eukaryota (superkingdom), cellular organisms (no rank)
C5GSK3_AJEDR	BDCG_07256	A0A0G2HPF0	2.6e-13	no	RQGAKACTNCHNKKVRCDLPTANGACSNCQSLNQECRPHIRKRRRRV	C6 transcription factor	Ajellomyces dermatitidis (strain ER-3 / ATCC MYA-2586) (Blastomyces dermatitidis)	Pathogen	Ajellomyces dermatitidis (species), Blastomyces (genus), Ajellomycetaceae (family), Onygenales (order), Eurotiomycetidae (subclass), Eurotiomycetes (class), leotiomyceta (no rank), Pezizomycotina (subphylum), saccharomyceta (no rank), Ascomycota (phylum), Dikarya (subkingdom), Fungi (kingdom), Opisthokonta (no rank), Eukaryota (superkingdom), cellular organisms (no rank)
A0A162KBX9_CORDF	LEL_00097	A0A0F0I810	1.8e-12	no	QQPASCTFCRQKKIRCDKKRPCANCTPFPFTLSVHSYSLELASP	C6 zinc finger domain-containing protein	Akanthomyces lecanii RCEF 1005	Pathogen	Cordyceps confragosa (species), Akanthomyces (genus), Cordycipitaceae (family), Hypocreales (order), Hypocreomycetidae (subclass), Sordariomycetes (class), sordariomyceta (no rank), leotiomyceta (no rank), Pezizomycotina (subphylum), saccharomyceta (no rank), Ascomycota (phylum), Dikarya (subkingdom), Fungi (kingdom), Opisthokonta (no rank), Eukaryota (superkingdom), cellular organisms (no rank)
A0A162KVY2_CORDF	LEL_00153	A0A0A2VRV7	2.4e-10	no	KAQRPCDLCRVRKALCNIPDPTRPCQLCDRTGRQCTFLAGTRSRPTR	Fungal specific transcription factor domain protein	Akanthomyces lecanii RCEF 1005	Pathogen	Cordyceps confragosa (species), Akanthomyces (genus), Cordycipitaceae (family), Hypocreales (order), Hypocreomycetidae (subclass), Sordariomycetes (class), sordariomyceta (no rank), leotiomyceta (no rank), Pezizomycotina (subphylum), saccharomyceta (no rank), Ascomycota (phylum), Dikarya (subkingdom), Fungi (kingdom), Opisthokonta (no rank), Eukaryota (superkingdom), cellular organisms (no rank)
A0A162KCJ8_CORDF	LEL_00297	A0A179GFF1	2.9e-12	no	RTSLSCDNCrASKVKCIHAGSAPCQRCRRSNLDGCALSLPKTPTGKL	Major facilitator superfamily domain, general substrate transporter	Akanthomyces lecanii RCEF 1005	Pathogen	Cordyceps confragosa (species), Akanthomyces (genus), Cordycipitaceae (family), Hypocreales (order), Hypocreomycetidae (subclass), Sordariomycetes (class), sordariomyceta (no rank), leotiomyceta (no rank), Pezizomycotina (subphylum), saccharomyceta (no rank), Ascomycota (phylum), Dikarya (subkingdom), Fungi (kingdom), Opisthokonta (no rank), Eukaryota (superkingdom), cellular organisms (no rank)
A0A162KWX3_CORDF	LEL_00593	A0A167C7B2	5e-17	no	KSAFSCEPCRRRKVKCGGEQPMCQRCTSRNDECVYKlNPTLSYTQ	Transcription factor	Akanthomyces lecanii RCEF 1005	Pathogen	Cordyceps confragosa (species), Akanthomyces (genus), Cordycipitaceae (family), Hypocreales (order), Hypocreomycetidae (subclass), Sordariomycetes (class), sordariomyceta (no rank), leotiomyceta (no rank), Pezizomycotina (subphylum), saccharomyceta (no rank), Ascomycota (phylum), Dikarya (subkingdom), Fungi (kingdom), Opisthokonta (no rank), Eukaryota (superkingdom), cellular organisms (no rank)
A0A168K4V2_CORDF	LEL_00779	A0A167V0A7	7e-11	no	DKVQLSCHLCRKRKQVLRCNRVQPCSNCSSRGLASSCTFPDNSNPPSA	Fungal specific transcription factor	Akanthomyces lecanii RCEF 1005	Pathogen	Cordyceps confragosa (species), Akanthomyces (genus), Cordycipitaceae (family), Hypocreales (order), Hypocreomycetidae (subclass), Sordariomycetes (class), sordariomyceta (no rank), leotiomyceta (no rank), Pezizomycotina (subphylum), saccharomyceta (no rank), Ascomycota (phylum), Dikarya (subkingdom), Fungi (kingdom), Opisthokonta (no rank), Eukaryota (superkingdom), cellular organisms (no rank)
A0A162KY24_CORDF	LEL_01083	A0A179I8D7	1.6e-13	no	KFLSCLNCRQRRSYCSKDKPTCSRCRDSGLVCTYEGARKILVN	C6 transcription factor	Akanthomyces lecanii RCEF 1005	Pathogen	Cordyceps confragosa (species), Akanthomyces (genus), Cordycipitaceae (family), Hypocreales (order), Hypocreomycetidae (subclass), Sordariomycetes (class), sordariomyceta (no rank), leotiomyceta (no rank), Pezizomycotina (subphylum), saccharomyceta (no rank), Ascomycota (phylum), Dikarya (subkingdom), Fungi (kingdom), Opisthokonta (no rank), Eukaryota (superkingdom), cellular organisms (no rank)
A0A168KHI7_CORDF	LEL_01245	G3JJR2	3.3e-14	no	RNIQACEQcRSRKVRCDGARPHCNVCLRRNEACKWSERPAPGNYR	Transcription factor	Akanthomyces lecanii RCEF 1005	Pathogen	Cordyceps confragosa (species), Akanthomyces (genus), Cordycipitaceae (family), Hypocreales (order), Hypocreomycetidae (subclass), Sordariomycetes (class), sordariomyceta (no rank), leotiomyceta (no rank), Pezizomycotina (subphylum), saccharomyceta (no rank), Ascomycota (phylum), Dikarya (subkingdom), Fungi (kingdom), Opisthokonta (no rank), Eukaryota (superkingdom), cellular organisms (no rank)
A0A168KIF9_CORDF	LEL_01285	A0A0G4L4M4	3e-14	no	HGSpCERCRAMKVKCSGEQPCSRCARQNESCYFVAESKRISVS	Fungal specific transcription factor	Akanthomyces lecanii RCEF 1005	Pathogen	Cordyceps confragosa (species), Akanthomyces (genus), Cordycipitaceae (family), Hypocreales (order), Hypocreomycetidae (subclass), Sordariomycetes (class), sordariomyceta (no rank), leotiomyceta (no rank), Pezizomycotina (subphylum), saccharomyceta (no rank), Ascomycota (phylum), Dikarya (subkingdom), Fungi (kingdom), Opisthokonta (no rank), Eukaryota (superkingdom), cellular organisms (no rank)
A0A168KPS1_CORDF	LEL_01525	A0A179I9D1	1.4e-11	no	RAAEACNFCRTSKKKCSATVPCTACQRRGIGHTCYLTNSPRASRSA	Fungal specific transcription factor	Akanthomyces lecanii RCEF 1005	Pathogen	Cordyceps confragosa (species), Akanthomyces (genus), Cordycipitaceae (family), Hypocreales (order), Hypocreomycetidae (subclass), Sordariomycetes (class), sordariomyceta (no rank), leotiomyceta (no rank), Pezizomycotina (subphylum), saccharomyceta (no rank), Ascomycota (phylum), Dikarya (subkingdom), Fungi (kingdom), Opisthokonta (no rank), Eukaryota (superkingdom), cellular organisms (no rank)
A0A168KR43_CORDF	LEL_01578	A0A0B4GXX3	1.1e-10	no	QVRPACTECQRRKQKCNRQWPCNHCQKRKVADRCRFSHAAAGSSER	Fungal specific transcription factor	Akanthomyces lecanii RCEF 1005	Pathogen	Cordyceps confragosa (species), Akanthomyces (genus), Cordycipitaceae (family), Hypocreales (order), Hypocreomycetidae (subclass), Sordariomycetes (class), sordariomyceta (no rank), leotiomyceta (no rank), Pezizomycotina (subphylum), saccharomyceta (no rank), Ascomycota (phylum), Dikarya (subkingdom), Fungi (kingdom), Opisthokonta (no rank), Eukaryota (superkingdom), cellular organisms (no rank)
A0A162L049_CORDF	LEL_01963	A0A0P7BFQ2	2.3e-13	no	YVAIAcvTCKQRKTKCSGERPCKRCRDSDIMCVYGRATRFQSTD	Fungal specific transcription factor domain-containing protein	Akanthomyces lecanii RCEF 1005	Pathogen	Cordyceps confragosa (species), Akanthomyces (genus), Cordycipitaceae (family), Hypocreales (order), Hypocreomycetidae (subclass), Sordariomycetes (class), sordariomyceta (no rank), leotiomyceta (no rank), Pezizomycotina (subphylum), saccharomyceta (no rank), Ascomycota (phylum), Dikarya (subkingdom), Fungi (kingdom), Opisthokonta (no rank), Eukaryota (superkingdom), cellular organisms (no rank)
A0A162K9A5_CORDF	LEL_02269	A0A179IIV1	4.8e-15	no	RTANaCIPCRQSKIKCSGEEPCANCERRYVKCRFEDSGGNKVTV	Transcription factor	Akanthomyces lecanii RCEF 1005	Pathogen	Cordyceps confragosa (species), Akanthomyces (genus), Cordycipitaceae (family), Hypocreales (order), Hypocreomycetidae (subclass), Sordariomycetes (class), sordariomyceta (no rank), leotiomyceta (no rank), Pezizomycotina (subphylum), saccharomyceta (no rank), Ascomycota (phylum), Dikarya (subkingdom), Fungi (kingdom), Opisthokonta (no rank), Eukaryota (superkingdom), cellular organisms (no rank)
A0A168I5M6_CORDF	LEL_02276	A0A094GXQ8	4.2e-14	no	RRPVSCDECRRSKLKCDRQQPCGACTRRGREGDCGYSSSSSTPTSA	Transcription factor	Akanthomyces lecanii RCEF 1005	Pathogen	Cordyceps confragosa (species), Akanthomyces (genus), Cordycipitaceae (family), Hypocreales (order), Hypocreomycetidae (subclass), Sordariomycetes (class), sordariomyceta (no rank), leotiomyceta (no rank), Pezizomycotina (subphylum), saccharomyceta (no rank), Ascomycota (phylum), Dikarya (subkingdom), Fungi (kingdom), Opisthokonta (no rank), Eukaryota (superkingdom), cellular organisms (no rank)
A0A162KSE3_CORDF	LEL_02624	A0A0P7BNH5	1.9e-11	no	RACDRCRRRKCKCDLPPSGSCAQCLAARTSCTFDLPTARRG	Transcription factor	Akanthomyces lecanii RCEF 1005	Pathogen	Cordyceps confragosa (species), Akanthomyces (genus), Cordycipitaceae (family), Hypocreales (order), Hypocreomycetidae (subclass), Sordariomycetes (class), sordariomyceta (no rank), leotiomyceta (no rank), Pezizomycotina (subphylum), saccharomyceta (no rank), Ascomycota (phylum), Dikarya (subkingdom), Fungi (kingdom), Opisthokonta (no rank), Eukaryota (superkingdom), cellular organisms (no rank)
A0A168IET8_CORDF	LEL_02663	G3JIP9	6.4e-14	no	RRVVISCIECHRRKQKCDRELPCGNCIARNREASCAYEAGAPTTKS	Fungal transcriptional regulatory protein	Akanthomyces lecanii RCEF 1005	Pathogen	Cordyceps confragosa (species), Akanthomyces (genus), Cordycipitaceae (family), Hypocreales (order), Hypocreomycetidae (subclass), Sordariomycetes (class), sordariomyceta (no rank), leotiomyceta (no rank), Pezizomycotina (subphylum), saccharomyceta (no rank), Ascomycota (phylum), Dikarya (subkingdom), Fungi (kingdom), Opisthokonta (no rank), Eukaryota (superkingdom), cellular organisms (no rank)
A0A162K948_CORDF	LEL_03048	A0A0A2VML2	9.1e-11	no	NRVPLSCYPCRTRKKCDRKHPCSNCTKREGNDTSSCTYAAPASQKK	Transcription factor	Akanthomyces lecanii RCEF 1005	Pathogen	Cordyceps confragosa (species), Akanthomyces (genus), Cordycipitaceae (family), Hypocreales (order), Hypocreomycetidae (subclass), Sordariomycetes (class), sordariomyceta (no rank), leotiomyceta (no rank), Pezizomycotina (subphylum), saccharomyceta (no rank), Ascomycota (phylum), Dikarya (subkingdom), Fungi (kingdom), Opisthokonta (no rank), Eukaryota (superkingdom), cellular organisms (no rank)
A0A168J4L0_CORDF	LEL_03483	A0A179IKF5	1.4e-12	no	RRTTQACDYCHQRSIRCRSSENGPTCQNCEAFAQQCTYNRKPRKRG	Transcription factor	Akanthomyces lecanii RCEF 1005	Pathogen	Cordyceps confragosa (species), Akanthomyces (genus), Cordycipitaceae (family), Hypocreales (order), Hypocreomycetidae (subclass), Sordariomycetes (class), sordariomyceta (no rank), leotiomyceta (no rank), Pezizomycotina (subphylum), saccharomyceta (no rank), Ascomycota (phylum), Dikarya (subkingdom), Fungi (kingdom), Opisthokonta (no rank), Eukaryota (superkingdom), cellular organisms (no rank)
A0A162KAN4_CORDF	LEL_03568	Q0CWZ1	6.9e-14	no	RTRQNPVSCRLCRLKKLKCNRQYPCSNCSARGVGCEYFARIPGSSS	Transcription factor	Akanthomyces lecanii RCEF 1005	Pathogen	Cordyceps confragosa (species), Akanthomyces (genus), Cordycipitaceae (family), Hypocreales (order), Hypocreomycetidae (subclass), Sordariomycetes (class), sordariomyceta (no rank), leotiomyceta (no rank), Pezizomycotina (subphylum), saccharomyceta (no rank), Ascomycota (phylum), Dikarya (subkingdom), Fungi (kingdom), Opisthokonta (no rank), Eukaryota (superkingdom), cellular organisms (no rank)
A0A168JDX4_CORDF	LEL_03800	A0A0A2VB41	1.2e-15	no	RKITACVACRKQKIKCHMKDAQPPCTRCKKRGLPCTVNRSLQMLLEN	Fungal specific transcription factor	Akanthomyces lecanii RCEF 1005	Pathogen	Cordyceps confragosa (species), Akanthomyces (genus), Cordycipitaceae (family), Hypocreales (order), Hypocreomycetidae (subclass), Sordariomycetes (class), sordariomyceta (no rank), leotiomyceta (no rank), Pezizomycotina (subphylum), saccharomyceta (no rank), Ascomycota (phylum), Dikarya (subkingdom), Fungi (kingdom), Opisthokonta (no rank), Eukaryota (superkingdom), cellular organisms (no rank)
A0A168GZH8_CORDF	LEL_03943	C4JJA3	1.2e-07	no	RPASACEYCKRKKIKDQSPLCSRCDGKTPCDNCARTKNESCVY	Transcription factor	Akanthomyces lecanii RCEF 1005	Pathogen	Cordyceps confragosa (species), Akanthomyces (genus), Cordycipitaceae (family), Hypocreales (order), Hypocreomycetidae (subclass), Sordariomycetes (class), sordariomyceta (no rank), leotiomyceta (no rank), Pezizomycotina (subphylum), saccharomyceta (no rank), Ascomycota (phylum), Dikarya (subkingdom), Fungi (kingdom), Opisthokonta (no rank), Eukaryota (superkingdom), cellular organisms (no rank)
A0A162K312_CORDF	LEL_04035	W9JJ48	1.6e-13	no	YVTrACDSCRKRKSRCNGLAPCSRCKGCGNvCSYDLPYTRGHA	Fructose-bisphosphate aldolase	Akanthomyces lecanii RCEF 1005	Pathogen	Cordyceps confragosa (species), Akanthomyces (genus), Cordycipitaceae (family), Hypocreales (order), Hypocreomycetidae (subclass), Sordariomycetes (class), sordariomyceta (no rank), leotiomyceta (no rank), Pezizomycotina (subphylum), saccharomyceta (no rank), Ascomycota (phylum), Dikarya (subkingdom), Fungi (kingdom), Opisthokonta (no rank), Eukaryota (superkingdom), cellular organisms (no rank)
A0A168H2P7_CORDF	LEL_04052	A0A094ASH6	9.9e-13	no	RTRMSCESCRERKQKCDRQLTKCRRCVALGHDCRYPASRKSYKGG	Binuclear zinc transcription factor	Akanthomyces lecanii RCEF 1005	Pathogen	Cordyceps confragosa (species), Akanthomyces (genus), Cordycipitaceae (family), Hypocreales (order), Hypocreomycetidae (subclass), Sordariomycetes (class), sordariomyceta (no rank), leotiomyceta (no rank), Pezizomycotina (subphylum), saccharomyceta (no rank), Ascomycota (phylum), Dikarya (subkingdom), Fungi (kingdom), Opisthokonta (no rank), Eukaryota (superkingdom), cellular organisms (no rank)
A0A168HDC6_CORDF	LEL_04452	A0A179HJI1	5e-07	no	AAIACRaCRRLRRKCVHDRGKPPCKSCRETGPEAcEFPS	Chitinase 1	Akanthomyces lecanii RCEF 1005	Pathogen	Cordyceps confragosa (species), Akanthomyces (genus), Cordycipitaceae (family), Hypocreales (order), Hypocreomycetidae (subclass), Sordariomycetes (class), sordariomyceta (no rank), leotiomyceta (no rank), Pezizomycotina (subphylum), saccharomyceta (no rank), Ascomycota (phylum), Dikarya (subkingdom), Fungi (kingdom), Opisthokonta (no rank), Eukaryota (superkingdom), cellular organisms (no rank)
A0A168HHN5_CORDF	LEL_04609	G3J598	3.7e-12	no	NNKRRSCDVCYKRKVRCDAADTGTTCDWCTHHSLICTFTPRKPRAR	Transcription factor	Akanthomyces lecanii RCEF 1005	Pathogen	Cordyceps confragosa (species), Akanthomyces (genus), Cordycipitaceae (family), Hypocreales (order), Hypocreomycetidae (subclass), Sordariomycetes (class), sordariomyceta (no rank), leotiomyceta (no rank), Pezizomycotina (subphylum), saccharomyceta (no rank), Ascomycota (phylum), Dikarya (subkingdom), Fungi (kingdom), Opisthokonta (no rank), Eukaryota (superkingdom), cellular organisms (no rank)
A0A168HSU2_CORDF	LEL_05030	A0A167HQM0	2.1e-16	no	SIRTsCERCRRRKIKCDRKRPCSRCVKAGKECILQGTGEKQrPV	Transcription factor	Akanthomyces lecanii RCEF 1005	Pathogen	Cordyceps confragosa (species), Akanthomyces (genus), Cordycipitaceae (family), Hypocreales (order), Hypocreomycetidae (subclass), Sordariomycetes (class), sordariomyceta (no rank), leotiomyceta (no rank), Pezizomycotina (subphylum), saccharomyceta (no rank), Ascomycota (phylum), Dikarya (subkingdom), Fungi (kingdom), Opisthokonta (no rank), Eukaryota (superkingdom), cellular organisms (no rank)
A0A162K679_CORDF	LEL_05275	A0A0A1T1F7	7.3e-13	no	RVSRACISCRSRKTRCDlDSTGSPGTPPCQRCIEEKRECVLATSRRGGRRV	NAD(P)-binding domain protein	Akanthomyces lecanii RCEF 1005	Pathogen	Cordyceps confragosa (species), Akanthomyces (genus), Cordycipitaceae (family), Hypocreales (order), Hypocreomycetidae (subclass), Sordariomycetes (class), sordariomyceta (no rank), leotiomyceta (no rank), Pezizomycotina (subphylum), saccharomyceta (no rank), Ascomycota (phylum), Dikarya (subkingdom), Fungi (kingdom), Opisthokonta (no rank), Eukaryota (superkingdom), cellular organisms (no rank)
A0A162KQN9_CORDF	LEL_05291	A0A179I0D5	4.4e-13	no	KRVAKACNSCNVRRIKCSGDRPCASCASANRECVYPAPIEKVSV	Transcription factor	Akanthomyces lecanii RCEF 1005	Pathogen	Cordyceps confragosa (species), Akanthomyces (genus), Cordycipitaceae (family), Hypocreales (order), Hypocreomycetidae (subclass), Sordariomycetes (class), sordariomyceta (no rank), leotiomyceta (no rank), Pezizomycotina (subphylum), saccharomyceta (no rank), Ascomycota (phylum), Dikarya (subkingdom), Fungi (kingdom), Opisthokonta (no rank), Eukaryota (superkingdom), cellular organisms (no rank)
A0A168G273_CORDF	LEL_05607	A0A179HZI3	9.4e-15	no	SKPRSCVTCRTRKVRCDKKSPCSNCRRAQISCVLPPDDKPPRWARR	Fungal specific transcription factor	Akanthomyces lecanii RCEF 1005	Pathogen	Cordyceps confragosa (species), Akanthomyces (genus), Cordycipitaceae (family), Hypocreales (order), Hypocreomycetidae (subclass), Sordariomycetes (class), sordariomyceta (no rank), leotiomyceta (no rank), Pezizomycotina (subphylum), saccharomyceta (no rank), Ascomycota (phylum), Dikarya (subkingdom), Fungi (kingdom), Opisthokonta (no rank), Eukaryota (superkingdom), cellular organisms (no rank)
A0A168G7D9_CORDF	LEL_05809	A0A179IJ34	3.8e-16	no	RRIALACTACRTRKSRCDGTRPICKLCRRMGFDCSYEMPQSATNL	Transcription factor	Akanthomyces lecanii RCEF 1005	Pathogen	Cordyceps confragosa (species), Akanthomyces (genus), Cordycipitaceae (family), Hypocreales (order), Hypocreomycetidae (subclass), Sordariomycetes (class), sordariomyceta (no rank), leotiomyceta (no rank), Pezizomycotina (subphylum), saccharomyceta (no rank), Ascomycota (phylum), Dikarya (subkingdom), Fungi (kingdom), Opisthokonta (no rank), Eukaryota (superkingdom), cellular organisms (no rank)
A0A168G9V8_CORDF	LEL_05898	A0A0D2CFT5	1.8e-12	no	RTRTGCRTCRNRKVKCDEVKPTCTQCRRGDRHCEWLQVEETRAR	Transcription factor	Akanthomyces lecanii RCEF 1005	Pathogen	Cordyceps confragosa (species), Akanthomyces (genus), Cordycipitaceae (family), Hypocreales (order), Hypocreomycetidae (subclass), Sordariomycetes (class), sordariomyceta (no rank), leotiomyceta (no rank), Pezizomycotina (subphylum), saccharomyceta (no rank), Ascomycota (phylum), Dikarya (subkingdom), Fungi (kingdom), Opisthokonta (no rank), Eukaryota (superkingdom), cellular organisms (no rank)
A0A168GFJ9_CORDF	LEL_06108	A0A167N5Q0	6.2e-13	no	RPCDQCRRSKVRCDKKVPCSSCKSAKRTCTTTGAGASPR	Fungal specific transcription factor	Akanthomyces lecanii RCEF 1005	Pathogen	Cordyceps confragosa (species), Akanthomyces (genus), Cordycipitaceae (family), Hypocreales (order), Hypocreomycetidae (subclass), Sordariomycetes (class), sordariomyceta (no rank), leotiomyceta (no rank), Pezizomycotina (subphylum), saccharomyceta (no rank), Ascomycota (phylum), Dikarya (subkingdom), Fungi (kingdom), Opisthokonta (no rank), Eukaryota (superkingdom), cellular organisms (no rank)
A0A168GQN2_CORDF	LEL_06473	J5JAL0	1.9e-14	no	KIDVACDRCRSRKVKCDGARPaCGNCSRKLDHRDQCHYGASSNLSPPN	Fungal specific transcription factor	Akanthomyces lecanii RCEF 1005	Pathogen	Cordyceps confragosa (species), Akanthomyces (genus), Cordycipitaceae (family), Hypocreales (order), Hypocreomycetidae (subclass), Sordariomycetes (class), sordariomyceta (no rank), leotiomyceta (no rank), Pezizomycotina (subphylum), saccharomyceta (no rank), Ascomycota (phylum), Dikarya (subkingdom), Fungi (kingdom), Opisthokonta (no rank), Eukaryota (superkingdom), cellular organisms (no rank)
A0A168FAN1_CORDF	LEL_06885	X0GWI1	1.5e-08	no	MTKVACKECRERRSKCDGRSPCDRCQSKDILCQYPTTKS	Transcription factor	Akanthomyces lecanii RCEF 1005	Pathogen	Cordyceps confragosa (species), Akanthomyces (genus), Cordycipitaceae (family), Hypocreales (order), Hypocreomycetidae (subclass), Sordariomycetes (class), sordariomyceta (no rank), leotiomyceta (no rank), Pezizomycotina (subphylum), saccharomyceta (no rank), Ascomycota (phylum), Dikarya (subkingdom), Fungi (kingdom), Opisthokonta (no rank), Eukaryota (superkingdom), cellular organisms (no rank)
A0A162N464_CORDF	LEL_07247	A0A179IUI9	7.8e-14	no	KRAARACDTCRRQKERCDGGVPCRRCFRLGRQCEFTGDVGDMPG	Transcription factor	Akanthomyces lecanii RCEF 1005	Pathogen	Cordyceps confragosa (species), Akanthomyces (genus), Cordycipitaceae (family), Hypocreales (order), Hypocreomycetidae (subclass), Sordariomycetes (class), sordariomyceta (no rank), leotiomyceta (no rank), Pezizomycotina (subphylum), saccharomyceta (no rank), Ascomycota (phylum), Dikarya (subkingdom), Fungi (kingdom), Opisthokonta (no rank), Eukaryota (superkingdom), cellular organisms (no rank)
A0A162N4W8_CORDF	LEL_07557	A0A0B4HGL5	8e-16	no	SRKIKACVACRKQKIKCHMINGKAPCSRCKSRSLPCTINRSLQMLME	Transcription factor	Akanthomyces lecanii RCEF 1005	Pathogen	Cordyceps confragosa (species), Akanthomyces (genus), Cordycipitaceae (family), Hypocreales (order), Hypocreomycetidae (subclass), Sordariomycetes (class), sordariomyceta (no rank), leotiomyceta (no rank), Pezizomycotina (subphylum), saccharomyceta (no rank), Ascomycota (phylum), Dikarya (subkingdom), Fungi (kingdom), Opisthokonta (no rank), Eukaryota (superkingdom), cellular organisms (no rank)
A0A168EW58_CORDF	LEL_07887	A0A063CC00	3.4e-08	no	CQACQQLGFRCVTREDSDGCTPCLDAGAECSLIALS	Nitrogen regulatory protein OTam	Akanthomyces lecanii RCEF 1005	Pathogen	Cordyceps confragosa (species), Akanthomyces (genus), Cordycipitaceae (family), Hypocreales (order), Hypocreomycetidae (subclass), Sordariomycetes (class), sordariomyceta (no rank), leotiomyceta (no rank), Pezizomycotina (subphylum), saccharomyceta (no rank), Ascomycota (phylum), Dikarya (subkingdom), Fungi (kingdom), Opisthokonta (no rank), Eukaryota (superkingdom), cellular organisms (no rank)
A0A168DRA1_CORDF	LEL_08699	J4UJ57	1.4e-09	no	KACDICFKRKIQCSIPSPGVPCDWCSNQEIPCTFTR	Transcription factor	Akanthomyces lecanii RCEF 1005	Pathogen	Cordyceps confragosa (species), Akanthomyces (genus), Cordycipitaceae (family), Hypocreales (order), Hypocreomycetidae (subclass), Sordariomycetes (class), sordariomyceta (no rank), leotiomyceta (no rank), Pezizomycotina (subphylum), saccharomyceta (no rank), Ascomycota (phylum), Dikarya (subkingdom), Fungi (kingdom), Opisthokonta (no rank), Eukaryota (superkingdom), cellular organisms (no rank)
A0A168DU49_CORDF	LEL_08791	G9MN67	1.3e-15	no	RSSLACVQCRNQHLKCDSVRPICARCLTLSKPCSYPDSRRGGR	Fungal specific transcription factor domain protein	Akanthomyces lecanii RCEF 1005	Pathogen	Cordyceps confragosa (species), Akanthomyces (genus), Cordycipitaceae (family), Hypocreales (order), Hypocreomycetidae (subclass), Sordariomycetes (class), sordariomyceta (no rank), leotiomyceta (no rank), Pezizomycotina (subphylum), saccharomyceta (no rank), Ascomycota (phylum), Dikarya (subkingdom), Fungi (kingdom), Opisthokonta (no rank), Eukaryota (superkingdom), cellular organisms (no rank)
A0A168DUB7_CORDF	LEL_08799	A0A179IMA2	4.6e-13	no	RPSvSCTVCRKRKLKCDRHHPCRNCLKSRSKTPERDCIYEDAPPLHLAR	Transcription factor	Akanthomyces lecanii RCEF 1005	Pathogen	Cordyceps confragosa (species), Akanthomyces (genus), Cordycipitaceae (family), Hypocreales (order), Hypocreomycetidae (subclass), Sordariomycetes (class), sordariomyceta (no rank), leotiomyceta (no rank), Pezizomycotina (subphylum), saccharomyceta (no rank), Ascomycota (phylum), Dikarya (subkingdom), Fungi (kingdom), Opisthokonta (no rank), Eukaryota (superkingdom), cellular organisms (no rank)
A0A168DWB5_CORDF	LEL_08871	A0A179I6A9	6.3e-15	no	RSRLACQTCRDLKRKCDGAEPCGTCVRFEYQCRYSAGSRMRNKT	Transcription factor	Akanthomyces lecanii RCEF 1005	Pathogen	Cordyceps confragosa (species), Akanthomyces (genus), Cordycipitaceae (family), Hypocreales (order), Hypocreomycetidae (subclass), Sordariomycetes (class), sordariomyceta (no rank), leotiomyceta (no rank), Pezizomycotina (subphylum), saccharomyceta (no rank), Ascomycota (phylum), Dikarya (subkingdom), Fungi (kingdom), Opisthokonta (no rank), Eukaryota (superkingdom), cellular organisms (no rank)
A0A162LJZ0_CORDF	LEL_08889	A0A0A2VCV3	1.1e-15	no	RQITSCLTCRRRKVRCDRRTPICSVCQRGNHACTYQSPSLTRIVP	Transcription factor	Akanthomyces lecanii RCEF 1005	Pathogen	Cordyceps confragosa (species), Akanthomyces (genus), Cordycipitaceae (family), Hypocreales (order), Hypocreomycetidae (subclass), Sordariomycetes (class), sordariomyceta (no rank), leotiomyceta (no rank), Pezizomycotina (subphylum), saccharomyceta (no rank), Ascomycota (phylum), Dikarya (subkingdom), Fungi (kingdom), Opisthokonta (no rank), Eukaryota (superkingdom), cellular organisms (no rank)
A0A168CS10_CORDF	LEL_08953	A0A179UPH0	2.1e-14	no	RQRLACAWCHERKVRCDATTSAGPCANCLQNGHECVLRTRSNrSRNV	FarB protein	Akanthomyces lecanii RCEF 1005	Pathogen	Cordyceps confragosa (species), Akanthomyces (genus), Cordycipitaceae (family), Hypocreales (order), Hypocreomycetidae (subclass), Sordariomycetes (class), sordariomyceta (no rank), leotiomyceta (no rank), Pezizomycotina (subphylum), saccharomyceta (no rank), Ascomycota (phylum), Dikarya (subkingdom), Fungi (kingdom), Opisthokonta (no rank), Eukaryota (superkingdom), cellular organisms (no rank)
A0A168CT99_CORDF	LEL_09001	A0A166XEE8	1.9e-13	no	GSRVCDQCRRRKIRCNRDWPCTACQVANQFCTTTGQGLELSDS	Fungal specific transcription factor	Akanthomyces lecanii RCEF 1005	Pathogen	Cordyceps confragosa (species), Akanthomyces (genus), Cordycipitaceae (family), Hypocreales (order), Hypocreomycetidae (subclass), Sordariomycetes (class), sordariomyceta (no rank), leotiomyceta (no rank), Pezizomycotina (subphylum), saccharomyceta (no rank), Ascomycota (phylum), Dikarya (subkingdom), Fungi (kingdom), Opisthokonta (no rank), Eukaryota (superkingdom), cellular organisms (no rank)
A0A168D0H3_CORDF	LEL_09255	A0A179IDG4	1.1e-13	no	RSSLACLSCRSRHQKCDAKKPQCTRCSEADRNCQYTKSRRGANIP	C6 zinc finger domain protein	Akanthomyces lecanii RCEF 1005	Pathogen	Cordyceps confragosa (species), Akanthomyces (genus), Cordycipitaceae (family), Hypocreales (order), Hypocreomycetidae (subclass), Sordariomycetes (class), sordariomyceta (no rank), leotiomyceta (no rank), Pezizomycotina (subphylum), saccharomyceta (no rank), Ascomycota (phylum), Dikarya (subkingdom), Fungi (kingdom), Opisthokonta (no rank), Eukaryota (superkingdom), cellular organisms (no rank)
A0A162LHZ1_CORDF	LEL_09445	K2S8D9	4.2e-11	no	PCDVCRKRKARCVVRDDGGCDQCNKIRVACTYDDPP	Transcription factor	Akanthomyces lecanii RCEF 1005	Pathogen	Cordyceps confragosa (species), Akanthomyces (genus), Cordycipitaceae (family), Hypocreales (order), Hypocreomycetidae (subclass), Sordariomycetes (class), sordariomyceta (no rank), leotiomyceta (no rank), Pezizomycotina (subphylum), saccharomyceta (no rank), Ascomycota (phylum), Dikarya (subkingdom), Fungi (kingdom), Opisthokonta (no rank), Eukaryota (superkingdom), cellular organisms (no rank)
A0A162MV27_CORDF	LEL_09520	A0A014NAZ1	5.9e-12	no	RLTLSCTECRRRKQKCDRVLPCTNCRVRSCESICSYELQAQDAPR	Transcription factor	Akanthomyces lecanii RCEF 1005	Pathogen	Cordyceps confragosa (species), Akanthomyces (genus), Cordycipitaceae (family), Hypocreales (order), Hypocreomycetidae (subclass), Sordariomycetes (class), sordariomyceta (no rank), leotiomyceta (no rank), Pezizomycotina (subphylum), saccharomyceta (no rank), Ascomycota (phylum), Dikarya (subkingdom), Fungi (kingdom), Opisthokonta (no rank), Eukaryota (superkingdom), cellular organisms (no rank)
A0A168AXR1_CORDF	LEL_10209	A0A0P7BEJ7	9e-14	no	RVAKACDFCRRRKLRCNNAQPKCQNCQARDIRCSYTERRRNArPS	Transcription factor	Akanthomyces lecanii RCEF 1005	Pathogen	Cordyceps confragosa (species), Akanthomyces (genus), Cordycipitaceae (family), Hypocreales (order), Hypocreomycetidae (subclass), Sordariomycetes (class), sordariomyceta (no rank), leotiomyceta (no rank), Pezizomycotina (subphylum), saccharomyceta (no rank), Ascomycota (phylum), Dikarya (subkingdom), Fungi (kingdom), Opisthokonta (no rank), Eukaryota (superkingdom), cellular organisms (no rank)
A0A167ZQQ1_CORDF	LEL_10423	A0A1B8GH65	1.6e-13	no	LPSCNGCKQRKLKCSRQMPVCANCKRLDVTCEYIQHKNKPG	Transcription factor	Akanthomyces lecanii RCEF 1005	Pathogen	Cordyceps confragosa (species), Akanthomyces (genus), Cordycipitaceae (family), Hypocreales (order), Hypocreomycetidae (subclass), Sordariomycetes (class), sordariomyceta (no rank), leotiomyceta (no rank), Pezizomycotina (subphylum), saccharomyceta (no rank), Ascomycota (phylum), Dikarya (subkingdom), Fungi (kingdom), Opisthokonta (no rank), Eukaryota (superkingdom), cellular organisms (no rank)
A0A167YJ21_CORDF	LEL_10475	A0A179I735	1.9e-13	no	ARKPLSCSTCRIKKIRCDKRMPCCHCVKANIRCTFPVQRKPRER	Transcription factor	Akanthomyces lecanii RCEF 1005	Pathogen	Cordyceps confragosa (species), Akanthomyces (genus), Cordycipitaceae (family), Hypocreales (order), Hypocreomycetidae (subclass), Sordariomycetes (class), sordariomyceta (no rank), leotiomyceta (no rank), Pezizomycotina (subphylum), saccharomyceta (no rank), Ascomycota (phylum), Dikarya (subkingdom), Fungi (kingdom), Opisthokonta (no rank), Eukaryota (superkingdom), cellular organisms (no rank)
A0A167RSF8_CORDF	LEL_10861	H6BUR0	4.6e-16	no	QQPVSCQFCRSRKLKCDRGRPSCFNCRSRNKDCIYGAGMRTASPQ	Fungal_trans domain-containing protein	Akanthomyces lecanii RCEF 1005	Pathogen	Cordyceps confragosa (species), Akanthomyces (genus), Cordycipitaceae (family), Hypocreales (order), Hypocreomycetidae (subclass), Sordariomycetes (class), sordariomyceta (no rank), leotiomyceta (no rank), Pezizomycotina (subphylum), saccharomyceta (no rank), Ascomycota (phylum), Dikarya (subkingdom), Fungi (kingdom), Opisthokonta (no rank), Eukaryota (superkingdom), cellular organisms (no rank)
A0A0L0SIB4_ALLM3	AMAG_07453	A0A0L0T419	1e-16	no	RTSQACESCRRRKVKCDGGLPCRHCLEFQLDCSYVASSKRRAR	Fungal_trans domain-containing protein	Allomyces macrogynus (strain ATCC 38327) (Allomyces javanicus var. macrogynus)	Non-Pathogen	Allomyces macrogynus (species), Allomyces (genus), Blastocladiaceae (family), Blastocladiales (order), Blastocladiomycetes (class), Blastocladiomycota incertae sedis (no rank), Blastocladiomycota (phylum), Fungi incertae sedis (no rank), Fungi (kingdom), Opisthokonta (no rank), Eukaryota (superkingdom), cellular organisms (no rank)
A0A0L0SLD6_ALLM3	AMAG_08349	A0A0L0T419	5.5e-16	no	ACESCRRRKVRCDGGLPCRHCLEFQLDCSYVAS	Fungal_trans domain-containing protein	Allomyces macrogynus (strain ATCC 38327) (Allomyces javanicus var. macrogynus)	Non-Pathogen	Allomyces macrogynus (species), Allomyces (genus), Blastocladiaceae (family), Blastocladiales (order), Blastocladiomycetes (class), Blastocladiomycota incertae sedis (no rank), Blastocladiomycota (phylum), Fungi incertae sedis (no rank), Fungi (kingdom), Opisthokonta (no rank), Eukaryota (superkingdom), cellular organisms (no rank)
A0A0L0SPB4_ALLM3	AMAG_09273	A0A0L0S580	3e-15	no	RIAQACIVCRKKKTKCSGERPSCRYCLDSGFPCSYAAPKRRGPPR	Fungal_trans domain-containing protein	Allomyces macrogynus (strain ATCC 38327) (Allomyces javanicus var. macrogynus)	Non-Pathogen	Allomyces macrogynus (species), Allomyces (genus), Blastocladiaceae (family), Blastocladiales (order), Blastocladiomycetes (class), Blastocladiomycota incertae sedis (no rank), Blastocladiomycota (phylum), Fungi incertae sedis (no rank), Fungi (kingdom), Opisthokonta (no rank), Eukaryota (superkingdom), cellular organisms (no rank)
A0A177DUU4_ALTAL	CC77DRAFT_1029422	A0A0D1YGV5	3e-11	no	CTRCAISKARCDRKVPCSQCVARGYVCQPRCTSR	Transcription factor Cmr1	Alternaria alternata (Alternaria rot fungus) (Torula alternata)	Pathogen	Alternaria alternata complex (no rank), Alternaria sect. Alternaria (no rank), Alternaria (genus), Pleosporaceae (family), Pleosporineae (suborder), Pleosporales (order), Pleosporomycetidae (subclass), Dothideomycetes (class), dothideomyceta (no rank), leotiomyceta (no rank), Pezizomycotina (subphylum), saccharomyceta (no rank), Ascomycota (phylum), Dikarya (subkingdom), Fungi (kingdom), Opisthok…
A0A177E0J3_ALTAL	CC77DRAFT_1046749	A0A1Y2M1N3	1.7e-14	no	RVPRACTGCRSHKIKCTGEKPRCKHCATTNRECVYILPRKDRLKi	Fungal_trans domain-containing protein	Alternaria alternata (Alternaria rot fungus) (Torula alternata)	Pathogen	Alternaria alternata complex (no rank), Alternaria sect. Alternaria (no rank), Alternaria (genus), Pleosporaceae (family), Pleosporineae (suborder), Pleosporales (order), Pleosporomycetidae (subclass), Dothideomycetes (class), dothideomyceta (no rank), leotiomyceta (no rank), Pezizomycotina (subphylum), saccharomyceta (no rank), Ascomycota (phylum), Dikarya (subkingdom), Fungi (kingdom), Opisthok…
A0A177DHD8_ALTAL	CC77DRAFT_1051535	A0A163F9Y0	3.2e-14	no	RPVVSCLRCREKKLKCDRTTPCENCTKASIAETCTYNRSGPAASKV	Fungal_trans domain-containing protein	Alternaria alternata (Alternaria rot fungus) (Torula alternata)	Pathogen	Alternaria alternata complex (no rank), Alternaria sect. Alternaria (no rank), Alternaria (genus), Pleosporaceae (family), Pleosporineae (suborder), Pleosporales (order), Pleosporomycetidae (subclass), Dothideomycetes (class), dothideomyceta (no rank), leotiomyceta (no rank), Pezizomycotina (subphylum), saccharomyceta (no rank), Ascomycota (phylum), Dikarya (subkingdom), Fungi (kingdom), Opisthok…
A0A177E162_ALTAL	CC77DRAFT_1056951	A0A178E3G7	5.1e-15	no	RSSNaCSRCRRQKIKCSGQQPCSSCGRRNLTCIFDDRENKVLVT	Fungal_trans domain-containing protein	Alternaria alternata (Alternaria rot fungus) (Torula alternata)	Pathogen	Alternaria alternata complex (no rank), Alternaria sect. Alternaria (no rank), Alternaria (genus), Pleosporaceae (family), Pleosporineae (suborder), Pleosporales (order), Pleosporomycetidae (subclass), Dothideomycetes (class), dothideomyceta (no rank), leotiomyceta (no rank), Pezizomycotina (subphylum), saccharomyceta (no rank), Ascomycota (phylum), Dikarya (subkingdom), Fungi (kingdom), Opisthok…
A0A177E0V3_ALTAL	CC77DRAFT_1058017	A0A178DH12	2.9e-12	no	RACASCVKAKQRCYGQNPCTRCHRKDLSCKFNDDQSEGA	Fungal_trans domain-containing protein	Alternaria alternata (Alternaria rot fungus) (Torula alternata)	Pathogen	Alternaria alternata complex (no rank), Alternaria sect. Alternaria (no rank), Alternaria (genus), Pleosporaceae (family), Pleosporineae (suborder), Pleosporales (order), Pleosporomycetidae (subclass), Dothideomycetes (class), dothideomyceta (no rank), leotiomyceta (no rank), Pezizomycotina (subphylum), saccharomyceta (no rank), Ascomycota (phylum), Dikarya (subkingdom), Fungi (kingdom), Opisthok…
A0A177DWB3_ALTAL	CC77DRAFT_1059170	A0A178DSI6	6.9e-13	no	GKPASCEPCRLNKTKCDHGHPKCDRCRQRGIEDRCFYHPAPLTRPRQ	Fungal_trans domain-containing protein	Alternaria alternata (Alternaria rot fungus) (Torula alternata)	Pathogen	Alternaria alternata complex (no rank), Alternaria sect. Alternaria (no rank), Alternaria (genus), Pleosporaceae (family), Pleosporineae (suborder), Pleosporales (order), Pleosporomycetidae (subclass), Dothideomycetes (class), dothideomyceta (no rank), leotiomyceta (no rank), Pezizomycotina (subphylum), saccharomyceta (no rank), Ascomycota (phylum), Dikarya (subkingdom), Fungi (kingdom), Opisthok…
A0A177DSK4_ALTAL	CC77DRAFT_1059892	R0I8K3	1.1e-13	no	RVALACKRCKRRKQRCDGARPVCRSCQRAGVACAYERTIRPQYP	Fungal_trans domain-containing protein	Alternaria alternata (Alternaria rot fungus) (Torula alternata)	Pathogen	Alternaria alternata complex (no rank), Alternaria sect. Alternaria (no rank), Alternaria (genus), Pleosporaceae (family), Pleosporineae (suborder), Pleosporales (order), Pleosporomycetidae (subclass), Dothideomycetes (class), dothideomyceta (no rank), leotiomyceta (no rank), Pezizomycotina (subphylum), saccharomyceta (no rank), Ascomycota (phylum), Dikarya (subkingdom), Fungi (kingdom), Opisthok…
A0A177DBN4_ALTAL	CC77DRAFT_1065014	A0A178E6Z2	8e-11	no	RTTQACQRCRNLKTRCLPSAQTGLCQRCFSAGKECTWAEAPRRTRK	Fungal_trans domain-containing protein	Alternaria alternata (Alternaria rot fungus) (Torula alternata)	Pathogen	Alternaria alternata complex (no rank), Alternaria sect. Alternaria (no rank), Alternaria (genus), Pleosporaceae (family), Pleosporineae (suborder), Pleosporales (order), Pleosporomycetidae (subclass), Dothideomycetes (class), dothideomyceta (no rank), leotiomyceta (no rank), Pezizomycotina (subphylum), saccharomyceta (no rank), Ascomycota (phylum), Dikarya (subkingdom), Fungi (kingdom), Opisthok…
A0A177DAC7_ALTAL	CC77DRAFT_1065430	A0A0D2CAI8	7.4e-10	no	SASTACDLCRKRKRRCVWNSGPQGCSPCTNMKETCTTTYTRKQRSKP	Fungal_trans domain-containing protein	Alternaria alternata (Alternaria rot fungus) (Torula alternata)	Pathogen	Alternaria alternata complex (no rank), Alternaria sect. Alternaria (no rank), Alternaria (genus), Pleosporaceae (family), Pleosporineae (suborder), Pleosporales (order), Pleosporomycetidae (subclass), Dothideomycetes (class), dothideomyceta (no rank), leotiomyceta (no rank), Pezizomycotina (subphylum), saccharomyceta (no rank), Ascomycota (phylum), Dikarya (subkingdom), Fungi (kingdom), Opisthok…
A0A177DP99_ALTAL	CC77DRAFT_817224	A0A178EJ90	1.4e-17	no	SKRKQACKSCRQRKKRCDAEHPSCSLCRRWNLKCEYSLPATSFAP	Fungal_trans domain-containing protein	Alternaria alternata (Alternaria rot fungus) (Torula alternata)	Pathogen	Alternaria alternata complex (no rank), Alternaria sect. Alternaria (no rank), Alternaria (genus), Pleosporaceae (family), Pleosporineae (suborder), Pleosporales (order), Pleosporomycetidae (subclass), Dothideomycetes (class), dothideomyceta (no rank), leotiomyceta (no rank), Pezizomycotina (subphylum), saccharomyceta (no rank), Ascomycota (phylum), Dikarya (subkingdom), Fungi (kingdom), Opisthok…
A0A177DVK1_ALTAL	CC77DRAFT_896361	A0A1Y2MCJ0	1.4e-10	no	AvPHACLQCRKVKMKCHKMAQDTRCVRCTRKSLQCDFLGHRRGRKHG	Fungal_trans domain-containing protein	Alternaria alternata (Alternaria rot fungus) (Torula alternata)	Pathogen	Alternaria alternata complex (no rank), Alternaria sect. Alternaria (no rank), Alternaria (genus), Pleosporaceae (family), Pleosporineae (suborder), Pleosporales (order), Pleosporomycetidae (subclass), Dothideomycetes (class), dothideomyceta (no rank), leotiomyceta (no rank), Pezizomycotina (subphylum), saccharomyceta (no rank), Ascomycota (phylum), Dikarya (subkingdom), Fungi (kingdom), Opisthok…
A0A177DVB9_ALTAL	CC77DRAFT_896747	A0A177C2T2	1.1e-15	no	KVQLSCDFCRKRkLRCDRNKPCGSCIRLGQATICTFPLSQVPRASQ	Fungal_trans domain-containing protein	Alternaria alternata (Alternaria rot fungus) (Torula alternata)	Pathogen	Alternaria alternata complex (no rank), Alternaria sect. Alternaria (no rank), Alternaria (genus), Pleosporaceae (family), Pleosporineae (suborder), Pleosporales (order), Pleosporomycetidae (subclass), Dothideomycetes (class), dothideomyceta (no rank), leotiomyceta (no rank), Pezizomycotina (subphylum), saccharomyceta (no rank), Ascomycota (phylum), Dikarya (subkingdom), Fungi (kingdom), Opisthok…
A0A177DTV0_ALTAL	CC77DRAFT_931839	X0M7X7	5.7e-16	no	TAQYACDICRQRKVRCDRALPKCrRCDRLNQPCSYNQAHPRRTRD	Fungal_trans domain-containing protein	Alternaria alternata (Alternaria rot fungus) (Torula alternata)	Pathogen	Alternaria alternata complex (no rank), Alternaria sect. Alternaria (no rank), Alternaria (genus), Pleosporaceae (family), Pleosporineae (suborder), Pleosporales (order), Pleosporomycetidae (subclass), Dothideomycetes (class), dothideomyceta (no rank), leotiomyceta (no rank), Pezizomycotina (subphylum), saccharomyceta (no rank), Ascomycota (phylum), Dikarya (subkingdom), Fungi (kingdom), Opisthok…
A0A177DRE6_ALTAL	CC77DRAFT_933771	A0A178DZX1	2.8e-12	no	SACQQCKERKGRCDGGQPCCNYCFKYEKHCIYTVRRRRGPGK	Fungal_trans domain-containing protein	Alternaria alternata (Alternaria rot fungus) (Torula alternata)	Pathogen	Alternaria alternata complex (no rank), Alternaria sect. Alternaria (no rank), Alternaria (genus), Pleosporaceae (family), Pleosporineae (suborder), Pleosporales (order), Pleosporomycetidae (subclass), Dothideomycetes (class), dothideomyceta (no rank), leotiomyceta (no rank), Pezizomycotina (subphylum), saccharomyceta (no rank), Ascomycota (phylum), Dikarya (subkingdom), Fungi (kingdom), Opisthok…
A0A177DQH6_ALTAL	CC77DRAFT_934932	R0I5I6	4.3e-11	no	RKGTHSCFECRRRKIRCIFQPDNPDVCSECFARGSRCIDQEHANPEVI	Fungal_trans domain-containing protein	Alternaria alternata (Alternaria rot fungus) (Torula alternata)	Pathogen	Alternaria alternata complex (no rank), Alternaria sect. Alternaria (no rank), Alternaria (genus), Pleosporaceae (family), Pleosporineae (suborder), Pleosporales (order), Pleosporomycetidae (subclass), Dothideomycetes (class), dothideomyceta (no rank), leotiomyceta (no rank), Pezizomycotina (subphylum), saccharomyceta (no rank), Ascomycota (phylum), Dikarya (subkingdom), Fungi (kingdom), Opisthok…
A0A177DE96_ALTAL	CC77DRAFT_940656	A0A1Y2M6Q5	2.2e-14	no	DKPILSCTLCRRRKLKCDRQQPCKTCVDRGLSLSCTYVRSTPTPRE	Fungal-specific transcription factor domain-containing protein	Alternaria alternata (Alternaria rot fungus) (Torula alternata)	Pathogen	Alternaria alternata complex (no rank), Alternaria sect. Alternaria (no rank), Alternaria (genus), Pleosporaceae (family), Pleosporineae (suborder), Pleosporales (order), Pleosporomycetidae (subclass), Dothideomycetes (class), dothideomyceta (no rank), leotiomyceta (no rank), Pezizomycotina (subphylum), saccharomyceta (no rank), Ascomycota (phylum), Dikarya (subkingdom), Fungi (kingdom), Opisthok…
A0A177DF40_ALTAL	CC77DRAFT_941032	W6YZE2	2.9e-13	no	FRVSRACDQCRNAREKCDANQPNCSPCLEARRICTYTSNPKKRGL	Quinic acid utilization activator	Alternaria alternata (Alternaria rot fungus) (Torula alternata)	Pathogen	Alternaria alternata complex (no rank), Alternaria sect. Alternaria (no rank), Alternaria (genus), Pleosporaceae (family), Pleosporineae (suborder), Pleosporales (order), Pleosporomycetidae (subclass), Dothideomycetes (class), dothideomyceta (no rank), leotiomyceta (no rank), Pezizomycotina (subphylum), saccharomyceta (no rank), Ascomycota (phylum), Dikarya (subkingdom), Fungi (kingdom), Opisthok…
A0A177DEQ1_ALTAL	CC77DRAFT_942114	A0A1Y2LW93	2.5e-11	no	RVHSSCDRCRSRKTKCIDPvPGPCRYCARTGAVCTIATPRRKRPYY	Aldehyde dehydrogenase-like protein	Alternaria alternata (Alternaria rot fungus) (Torula alternata)	Pathogen	Alternaria alternata complex (no rank), Alternaria sect. Alternaria (no rank), Alternaria (genus), Pleosporaceae (family), Pleosporineae (suborder), Pleosporales (order), Pleosporomycetidae (subclass), Dothideomycetes (class), dothideomyceta (no rank), leotiomyceta (no rank), Pezizomycotina (subphylum), saccharomyceta (no rank), Ascomycota (phylum), Dikarya (subkingdom), Fungi (kingdom), Opisthok…
A0A177D1U8_ALTAL	CC77DRAFT_950905	M2T8B5	6.2e-14	no	TGKRACDSCRTKKIRCDRQVPCSQCRANKSiCRTTALPEKGHR	Fungal_trans domain-containing protein	Alternaria alternata (Alternaria rot fungus) (Torula alternata)	Pathogen	Alternaria alternata complex (no rank), Alternaria sect. Alternaria (no rank), Alternaria (genus), Pleosporaceae (family), Pleosporineae (suborder), Pleosporales (order), Pleosporomycetidae (subclass), Dothideomycetes (class), dothideomyceta (no rank), leotiomyceta (no rank), Pezizomycotina (subphylum), saccharomyceta (no rank), Ascomycota (phylum), Dikarya (subkingdom), Fungi (kingdom), Opisthok…
A0A177DXA2_ALTAL	CC77DRAFT_981335	W7EET5	1.5e-12	no	RVSRACDQCRVAREKCDGVQPTCSTCSGTSRECSYTANPKKRGIQ	Quinic acid utilization activator	Alternaria alternata (Alternaria rot fungus) (Torula alternata)	Pathogen	Alternaria alternata complex (no rank), Alternaria sect. Alternaria (no rank), Alternaria (genus), Pleosporaceae (family), Pleosporineae (suborder), Pleosporales (order), Pleosporomycetidae (subclass), Dothideomycetes (class), dothideomyceta (no rank), leotiomyceta (no rank), Pezizomycotina (subphylum), saccharomyceta (no rank), Ascomycota (phylum), Dikarya (subkingdom), Fungi (kingdom), Opisthok…
A0A0C2WD11_AMAMU	M378DRAFT_1018412	A0A2A9NXY2	3.5e-09	no	QAPLSCCECRrLKLKCDRSFPCASCKKRGCAEICPDgVLVSGKGTR	Fungal_trans domain-containing protein	Amanita muscaria (strain Koide BX008)	Non-Pathogen	Amanita muscaria (species), Amanita (genus), Amanitaceae (family), Agaricales (order), Agaricomycetidae (subclass), Agaricomycetes (class), Agaricomycotina (subphylum), Basidiomycota (phylum), Dikarya (subkingdom), Fungi (kingdom), Opisthokonta (no rank), Eukaryota (superkingdom), cellular organisms (no rank)
A0A0C2X8C0_AMAMU	M378DRAFT_10667	A0A2A9NDV6	4.2e-12	no	RGVVLSCAECRRLKLKCARDFPCSNCVKKGCAAICPNGSLTTGRGN	Fungal_trans domain-containing protein	Amanita muscaria (strain Koide BX008)	Non-Pathogen	Amanita muscaria (species), Amanita (genus), Amanitaceae (family), Agaricales (order), Agaricomycetidae (subclass), Agaricomycetes (class), Agaricomycotina (subphylum), Basidiomycota (phylum), Dikarya (subkingdom), Fungi (kingdom), Opisthokonta (no rank), Eukaryota (superkingdom), cellular organisms (no rank)
A0A0C2WQ16_AMAMU	M378DRAFT_164205	A0A2A9NLB2	1.3e-10	no	KtPGACKHCKRLKMKCEFPKGEDTCERCKTTGRACILETRKPKIPAn	Fungal_trans domain-containing protein (Fragment)	Amanita muscaria (strain Koide BX008)	Non-Pathogen	Amanita muscaria (species), Amanita (genus), Amanitaceae (family), Agaricales (order), Agaricomycetidae (subclass), Agaricomycetes (class), Agaricomycotina (subphylum), Basidiomycota (phylum), Dikarya (subkingdom), Fungi (kingdom), Opisthokonta (no rank), Eukaryota (superkingdom), cellular organisms (no rank)
A0A0C2XA53_AMAMU	M378DRAFT_6071	A0A2A9NAD1	6.3e-10	no	RvPTACAECRRLKLRCNRQVPCEKCESRGCAAICPDgVLTPGRGNR	Fungal_trans domain-containing protein	Amanita muscaria (strain Koide BX008)	Non-Pathogen	Amanita muscaria (species), Amanita (genus), Amanitaceae (family), Agaricales (order), Agaricomycetidae (subclass), Agaricomycetes (class), Agaricomycotina (subphylum), Basidiomycota (phylum), Dikarya (subkingdom), Fungi (kingdom), Opisthokonta (no rank), Eukaryota (superkingdom), cellular organisms (no rank)
A0A0C2TQH9_AMAMU	M378DRAFT_69722	A0A2A9N8T7	7.3e-11	no	KVGLSCAECRrSKLKCDrVFPCQSCIrRGCAHICPDgALTATKGNk	Fungal_trans domain-containing protein	Amanita muscaria (strain Koide BX008)	Non-Pathogen	Amanita muscaria (species), Amanita (genus), Amanitaceae (family), Agaricales (order), Agaricomycetidae (subclass), Agaricomycetes (class), Agaricomycotina (subphylum), Basidiomycota (phylum), Dikarya (subkingdom), Fungi (kingdom), Opisthokonta (no rank), Eukaryota (superkingdom), cellular organisms (no rank)
A0A2A9NJI9_9AGAR	AMATHDRAFT_151154	A0A067TDM1	1.5e-12	no	RVQVSCAECRrLKIKCDKQIPCQSCQRRGCAALCPNgSLATGQGTr	Fungal_trans domain-containing protein	Amanita thiersii Skay4041	Non-Pathogen	Amanita thiersii (species), Amanita (genus), Amanitaceae (family), Agaricales (order), Agaricomycetidae (subclass), Agaricomycetes (class), Agaricomycotina (subphylum), Basidiomycota (phylum), Dikarya (subkingdom), Fungi (kingdom), Opisthokonta (no rank), Eukaryota (superkingdom), cellular organisms (no rank)
A0A2A9NZI2_9AGAR	AMATHDRAFT_45610	A0A0C2WR52	7.7e-11	no	NRKLSCKECRrLKLKCDRVFPCQSCVKRGCSSLCPEgALTSGRGSr	Fungal_trans domain-containing protein	Amanita thiersii Skay4041	Non-Pathogen	Amanita thiersii (species), Amanita (genus), Amanitaceae (family), Agaricales (order), Agaricomycetidae (subclass), Agaricomycetes (class), Agaricomycotina (subphylum), Basidiomycota (phylum), Dikarya (subkingdom), Fungi (kingdom), Opisthokonta (no rank), Eukaryota (superkingdom), cellular organisms (no rank)
A0A2H3EUX8_ARMGA	ARMGADRAFT_1004044	A0A0C9WAS8	2.9e-17	no	RVQRACDICRRKKiRcDGVQMPENRCSNCIAYNFDCTYVEAAKKRGPP	Fungal_trans domain-containing protein	Armillaria gallica (Bulbous honey fungus) (Armillaria bulbosa)	Pathogen	Armillaria (genus), Physalacriaceae (family), Agaricales (order), Agaricomycetidae (subclass), Agaricomycetes (class), Agaricomycotina (subphylum), Basidiomycota (phylum), Dikarya (subkingdom), Fungi (kingdom), Opisthokonta (no rank), Eukaryota (superkingdom), cellular organisms (no rank)
A0A2H3DJ12_ARMGA	ARMGADRAFT_1011085	A0A2H3CDA9	1.1e-16	no	KQKACDSCRHKKvKcDGMLMPEKRCSNCITFKLDCTYIDGSQNEYSDa	Fungal_trans domain-containing protein	Armillaria gallica (Bulbous honey fungus) (Armillaria bulbosa)	Pathogen	Armillaria (genus), Physalacriaceae (family), Agaricales (order), Agaricomycetidae (subclass), Agaricomycetes (class), Agaricomycotina (subphylum), Basidiomycota (phylum), Dikarya (subkingdom), Fungi (kingdom), Opisthokonta (no rank), Eukaryota (superkingdom), cellular organisms (no rank)
A0A2H3CNS4_ARMGA	ARMGADRAFT_1018401	A0A2H3BJW4	7.2e-11	no	PYAAQACDVCRRKKTRCNGIWPVCGPCEASKRHNECSWTGESVRHPR	Fungal_trans domain-containing protein	Armillaria gallica (Bulbous honey fungus) (Armillaria bulbosa)	Pathogen	Armillaria (genus), Physalacriaceae (family), Agaricales (order), Agaricomycetidae (subclass), Agaricomycetes (class), Agaricomycotina (subphylum), Basidiomycota (phylum), Dikarya (subkingdom), Fungi (kingdom), Opisthokonta (no rank), Eukaryota (superkingdom), cellular organisms (no rank)
A0A2H3CH15_ARMGA	ARMGADRAFT_1019697	A0A2H3BJW4	5.4e-12	no	YAAQACDVCRRkKTRCNGVRPVCGPCEASKRHSECSWTGESVRHPRT	Fungal_trans domain-containing protein	Armillaria gallica (Bulbous honey fungus) (Armillaria bulbosa)	Pathogen	Armillaria (genus), Physalacriaceae (family), Agaricales (order), Agaricomycetidae (subclass), Agaricomycetes (class), Agaricomycotina (subphylum), Basidiomycota (phylum), Dikarya (subkingdom), Fungi (kingdom), Opisthokonta (no rank), Eukaryota (superkingdom), cellular organisms (no rank)
A0A2H3CXK6_ARMGA	ARMGADRAFT_1085107	A0A2H3DAA9	5e-15	no	RLAGSCDRCRKKRvKcDSATTQDNLCSNCIASNAECTHADLIKRRGSI	Fungal_trans domain-containing protein	Armillaria gallica (Bulbous honey fungus) (Armillaria bulbosa)	Pathogen	Armillaria (genus), Physalacriaceae (family), Agaricales (order), Agaricomycetidae (subclass), Agaricomycetes (class), Agaricomycotina (subphylum), Basidiomycota (phylum), Dikarya (subkingdom), Fungi (kingdom), Opisthokonta (no rank), Eukaryota (superkingdom), cellular organisms (no rank)
A0A2H3DSP4_ARMGA	ARMGADRAFT_1130185	A0A2H3BPI7	7.9e-10	no	RPGACTQCKKIKMKCEFPPDEKVCKRCKPKGYRCIVEAPKPKVyER	Fungal_trans domain-containing protein	Armillaria gallica (Bulbous honey fungus) (Armillaria bulbosa)	Pathogen	Armillaria (genus), Physalacriaceae (family), Agaricales (order), Agaricomycetidae (subclass), Agaricomycetes (class), Agaricomycotina (subphylum), Basidiomycota (phylum), Dikarya (subkingdom), Fungi (kingdom), Opisthokonta (no rank), Eukaryota (superkingdom), cellular organisms (no rank)
A0A2H3DJP6_ARMGA	ARMGADRAFT_450546	A0A2H3DU47	1.8e-14	no	RRMTRACDKCRVRKIRCNYTTEQGNRCLNCIVLDMECTYMAPTK	Fungal_trans domain-containing protein	Armillaria gallica (Bulbous honey fungus) (Armillaria bulbosa)	Pathogen	Armillaria (genus), Physalacriaceae (family), Agaricales (order), Agaricomycetidae (subclass), Agaricomycetes (class), Agaricomycotina (subphylum), Basidiomycota (phylum), Dikarya (subkingdom), Fungi (kingdom), Opisthokonta (no rank), Eukaryota (superkingdom), cellular organisms (no rank)
A0A2H3E669_ARMGA	ARMGADRAFT_493570	A0A2H3ASE1	2.2e-12	no	RPQTACEFCRRRKSEcDGAQRPGKQCSNCAACNIDCKYSDSRRVLAsA	Fungal_trans domain-containing protein	Armillaria gallica (Bulbous honey fungus) (Armillaria bulbosa)	Pathogen	Armillaria (genus), Physalacriaceae (family), Agaricales (order), Agaricomycetidae (subclass), Agaricomycetes (class), Agaricomycotina (subphylum), Basidiomycota (phylum), Dikarya (subkingdom), Fungi (kingdom), Opisthokonta (no rank), Eukaryota (superkingdom), cellular organisms (no rank)
A0A2H3E521_ARMGA	ARMGADRAFT_572182	A0A2H3BTU8	7e-12	no	RRPGACIRCKQVKMKCDFAPGEKTCQRCKPKGYHCVVESPKPKVyER	Fungal_trans domain-containing protein	Armillaria gallica (Bulbous honey fungus) (Armillaria bulbosa)	Pathogen	Armillaria (genus), Physalacriaceae (family), Agaricales (order), Agaricomycetidae (subclass), Agaricomycetes (class), Agaricomycotina (subphylum), Basidiomycota (phylum), Dikarya (subkingdom), Fungi (kingdom), Opisthokonta (no rank), Eukaryota (superkingdom), cellular organisms (no rank)
A0A2H3E1N7_ARMGA	ARMGADRAFT_922653	A0A2H3BZA4	2.1e-11	no	GRLLSCRECRrLKLKCDRVFPCQSCRKRGCSDICPDgALTSGRGSr	Fungal_trans domain-containing protein	Armillaria gallica (Bulbous honey fungus) (Armillaria bulbosa)	Pathogen	Armillaria (genus), Physalacriaceae (family), Agaricales (order), Agaricomycetidae (subclass), Agaricomycetes (class), Agaricomycotina (subphylum), Basidiomycota (phylum), Dikarya (subkingdom), Fungi (kingdom), Opisthokonta (no rank), Eukaryota (superkingdom), cellular organisms (no rank)
A0A2H3ECP9_ARMGA	ARMGADRAFT_959952	A0A2H3BTU8	1.9e-11	no	RRPGACTRCKQVKMKCNFAPGEQTCQRCKPKGYHCVVEAPKPKVyER	Fungal_trans domain-containing protein	Armillaria gallica (Bulbous honey fungus) (Armillaria bulbosa)	Pathogen	Armillaria (genus), Physalacriaceae (family), Agaricales (order), Agaricomycetidae (subclass), Agaricomycetes (class), Agaricomycotina (subphylum), Basidiomycota (phylum), Dikarya (subkingdom), Fungi (kingdom), Opisthokonta (no rank), Eukaryota (superkingdom), cellular organisms (no rank)
A0A2H3C2K5_9AGAR	ARMSODRAFT_1013490	A0A2H3CE60	2.6e-14	no	HKGSACLNCrRRKIKCDGLRPVCGPCLASPGFSDCEYSDRGVTRAQ	Fungal_trans domain-containing protein	Armillaria solidipes	Pathogen	Armillaria (genus), Physalacriaceae (family), Agaricales (order), Agaricomycetidae (subclass), Agaricomycetes (class), Agaricomycotina (subphylum), Basidiomycota (phylum), Dikarya (subkingdom), Fungi (kingdom), Opisthokonta (no rank), Eukaryota (superkingdom), cellular organisms (no rank)
A0A2H3BU28_9AGAR	ARMSODRAFT_1015915	A0A2H3ETM2	2e-13	no	KVAKACDNCKRKKvKcEGDRQSNQRCKNCISNDVDCTYIAAAKMIPYR	Fungal_trans domain-containing protein	Armillaria solidipes	Pathogen	Armillaria (genus), Physalacriaceae (family), Agaricales (order), Agaricomycetidae (subclass), Agaricomycetes (class), Agaricomycotina (subphylum), Basidiomycota (phylum), Dikarya (subkingdom), Fungi (kingdom), Opisthokonta (no rank), Eukaryota (superkingdom), cellular organisms (no rank)
A0A2H3B9X4_9AGAR	ARMSODRAFT_1021285	A0A2H3BPI7	7.8e-10	no	RPGACTQCKKIKMKCEFPPDEKVCKRCKPKGYRCIVEAPKPKVyKR	Fungal_trans domain-containing protein	Armillaria solidipes	Pathogen	Armillaria (genus), Physalacriaceae (family), Agaricales (order), Agaricomycetidae (subclass), Agaricomycetes (class), Agaricomycotina (subphylum), Basidiomycota (phylum), Dikarya (subkingdom), Fungi (kingdom), Opisthokonta (no rank), Eukaryota (superkingdom), cellular organisms (no rank)
A0A2H3BAM4_9AGAR	ARMSODRAFT_1021976	A0A2H3E5K2	3.4e-11	no	KSQAVSCQECRRLKLkCDRVFPCASCIRRGCANLCPHGTLEKGKRGF	Fungal_trans domain-containing protein	Armillaria solidipes	Pathogen	Armillaria (genus), Physalacriaceae (family), Agaricales (order), Agaricomycetidae (subclass), Agaricomycetes (class), Agaricomycotina (subphylum), Basidiomycota (phylum), Dikarya (subkingdom), Fungi (kingdom), Opisthokonta (no rank), Eukaryota (superkingdom), cellular organisms (no rank)
A0A2H3ANS5_9AGAR	ARMSODRAFT_1026523	A0A2H3EJ47	4.4e-15	no	HVSRACNACRRrKSKCDAIKPKCgTCSLYNDDCQYTTEQDGRKPV	Fungal_trans domain-containing protein	Armillaria solidipes	Pathogen	Armillaria (genus), Physalacriaceae (family), Agaricales (order), Agaricomycetidae (subclass), Agaricomycetes (class), Agaricomycotina (subphylum), Basidiomycota (phylum), Dikarya (subkingdom), Fungi (kingdom), Opisthokonta (no rank), Eukaryota (superkingdom), cellular organisms (no rank)
A0A2H3AM80_9AGAR	ARMSODRAFT_1026985	A0A2H3EGT8	4.1e-13	no	RVPLACHRCRTKRARCSGERPVCRTCAKVGEECTWPSGRRRKRTR	Fungal_trans domain-containing protein	Armillaria solidipes	Pathogen	Armillaria (genus), Physalacriaceae (family), Agaricales (order), Agaricomycetidae (subclass), Agaricomycetes (class), Agaricomycotina (subphylum), Basidiomycota (phylum), Dikarya (subkingdom), Fungi (kingdom), Opisthokonta (no rank), Eukaryota (superkingdom), cellular organisms (no rank)
A0A2H3B4K2_9AGAR	ARMSODRAFT_1027975	A0A2H3AIR1	2.2e-14	no	RLAGSCDRCRKKRvKcDSATTQDNLCSNCIASNAKCTHADLIKVR	Fungal_trans domain-containing protein	Armillaria solidipes	Pathogen	Armillaria (genus), Physalacriaceae (family), Agaricales (order), Agaricomycetidae (subclass), Agaricomycetes (class), Agaricomycotina (subphylum), Basidiomycota (phylum), Dikarya (subkingdom), Fungi (kingdom), Opisthokonta (no rank), Eukaryota (superkingdom), cellular organisms (no rank)
A0A2H3BYW9_9AGAR	ARMSODRAFT_211562	A0A2H3DU47	9.1e-15	no	RRMTRACDRCRVRKIRCNYTTEEANRCLNCIVLDMECTYMAPTK	Fungal_trans domain-containing protein	Armillaria solidipes	Pathogen	Armillaria (genus), Physalacriaceae (family), Agaricales (order), Agaricomycetidae (subclass), Agaricomycetes (class), Agaricomycotina (subphylum), Basidiomycota (phylum), Dikarya (subkingdom), Fungi (kingdom), Opisthokonta (no rank), Eukaryota (superkingdom), cellular organisms (no rank)
A0A2H3AVK8_9AGAR	ARMSODRAFT_653677	A0A2H3E5D2	1.1e-14	no	RLQGACDACRRKKiKcDSRNMPGNQCSNCRAFNSPCTHDEPAKKRGPK	Fungal_trans domain-containing protein	Armillaria solidipes	Pathogen	Armillaria (genus), Physalacriaceae (family), Agaricales (order), Agaricomycetidae (subclass), Agaricomycetes (class), Agaricomycotina (subphylum), Basidiomycota (phylum), Dikarya (subkingdom), Fungi (kingdom), Opisthokonta (no rank), Eukaryota (superkingdom), cellular organisms (no rank)
A0A2H3B8E7_9AGAR	ARMSODRAFT_938302	A0A2H3DNZ6	7.9e-14	no	RRLPRACDMCKRKKVRCDSDQMPGKRCSNCVAFNLQCTHVEAMN	Fungal_trans domain-containing protein	Armillaria solidipes	Pathogen	Armillaria (genus), Physalacriaceae (family), Agaricales (order), Agaricomycetidae (subclass), Agaricomycetes (class), Agaricomycotina (subphylum), Basidiomycota (phylum), Dikarya (subkingdom), Fungi (kingdom), Opisthokonta (no rank), Eukaryota (superkingdom), cellular organisms (no rank)
A0A2H3CGS2_9AGAR	ARMSODRAFT_950349	A0A0C9WAS8	2.9e-17	no	RVQRACDICRRKKiRcDGVQMPENRCSNCIAYNFDCTYVEAAKKRGPP	Fungal_trans domain-containing protein	Armillaria solidipes	Pathogen	Armillaria (genus), Physalacriaceae (family), Agaricales (order), Agaricomycetidae (subclass), Agaricomycetes (class), Agaricomycotina (subphylum), Basidiomycota (phylum), Dikarya (subkingdom), Fungi (kingdom), Opisthokonta (no rank), Eukaryota (superkingdom), cellular organisms (no rank)
A0A2H3BIT9_9AGAR	ARMSODRAFT_955495	A0A2H3DU47	3.3e-12	no	RMTCACDRCRVRKiRcKHAAEQGNRCLNCIAVDVECTYKAPTKKRGQK	Fungal_trans domain-containing protein	Armillaria solidipes	Pathogen	Armillaria (genus), Physalacriaceae (family), Agaricales (order), Agaricomycetidae (subclass), Agaricomycetes (class), Agaricomycotina (subphylum), Basidiomycota (phylum), Dikarya (subkingdom), Fungi (kingdom), Opisthokonta (no rank), Eukaryota (superkingdom), cellular organisms (no rank)
A0A2H3BIC0_9AGAR	ARMSODRAFT_959936	A0A2H3D9B4	8.4e-15	no	RVQRACDLCRRKKiRcDAMSMTDERCSICVAANVSCTYLEEAKKKGPS	Fungal_trans domain-containing protein	Armillaria solidipes	Pathogen	Armillaria (genus), Physalacriaceae (family), Agaricales (order), Agaricomycetidae (subclass), Agaricomycetes (class), Agaricomycotina (subphylum), Basidiomycota (phylum), Dikarya (subkingdom), Fungi (kingdom), Opisthokonta (no rank), Eukaryota (superkingdom), cellular organisms (no rank)
A0A2H3B3F2_9AGAR	ARMSODRAFT_964738	A0A2H3DLY6	1.3e-15	no	RLQGACDACRQKKvKcDSATMEGNPCSNCRIMNCPCTHNIPAKKRGPK	Fungal_trans domain-containing protein	Armillaria solidipes	Pathogen	Armillaria (genus), Physalacriaceae (family), Agaricales (order), Agaricomycetidae (subclass), Agaricomycetes (class), Agaricomycotina (subphylum), Basidiomycota (phylum), Dikarya (subkingdom), Fungi (kingdom), Opisthokonta (no rank), Eukaryota (superkingdom), cellular organisms (no rank)
G1X776_ARTOA	AOL_s00054g720	S8AMT5	5.9e-12	no	KEAMNCKSCRKRKIKCSRTRPKCNSCEVFHCECIYdAVPRKrGPK	Fungal_trans domain-containing protein	Arthrobotrys oligospora (strain ATCC 24927 / CBS 115.81 / DSM 1491) (Nematode-trapping fungus) (Didymozoophaga oligospora)	Pathogen	Orbilia oligospora (species), Orbilia (genus), Orbiliaceae (family), Orbiliales (order), Orbiliomycetes (class), Pezizomycotina (subphylum), saccharomyceta (no rank), Ascomycota (phylum), Dikarya (subkingdom), Fungi (kingdom), Opisthokonta (no rank), Eukaryota (superkingdom), cellular organisms (no rank)
G1X9S0_ARTOA	AOL_s00076g409	S8BAU7	7.4e-14	no	RRNSRACDACRSRKTKCDANGAGVCTSCASASLVCRFTESGNGKK	Fungal_trans domain-containing protein	Arthrobotrys oligospora (strain ATCC 24927 / CBS 115.81 / DSM 1491) (Nematode-trapping fungus) (Didymozoophaga oligospora)	Pathogen	Orbilia oligospora (species), Orbilia (genus), Orbiliaceae (family), Orbiliales (order), Orbiliomycetes (class), Pezizomycotina (subphylum), saccharomyceta (no rank), Ascomycota (phylum), Dikarya (subkingdom), Fungi (kingdom), Opisthokonta (no rank), Eukaryota (superkingdom), cellular organisms (no rank)
G1XBC6_ARTOA	AOL_s00078g223	S8ADA4	6.9e-11	no	RVPVSCGPCRHRkLKCNRQSPCENCVKRDDIASCKI	Fungal_trans domain-containing protein	Arthrobotrys oligospora (strain ATCC 24927 / CBS 115.81 / DSM 1491) (Nematode-trapping fungus) (Didymozoophaga oligospora)	Pathogen	Orbilia oligospora (species), Orbilia (genus), Orbiliaceae (family), Orbiliales (order), Orbiliomycetes (class), Pezizomycotina (subphylum), saccharomyceta (no rank), Ascomycota (phylum), Dikarya (subkingdom), Fungi (kingdom), Opisthokonta (no rank), Eukaryota (superkingdom), cellular organisms (no rank)
G1XAY8_ARTOA	AOL_s00078g85	S8BYX3	1.1e-10	no	RKDRPCDACRRRKSRCVMNEDSSVCVLCQFHKQDCTFLQSPQPRKRR	Fungal_trans domain-containing protein	Arthrobotrys oligospora (strain ATCC 24927 / CBS 115.81 / DSM 1491) (Nematode-trapping fungus) (Didymozoophaga oligospora)	Pathogen	Orbilia oligospora (species), Orbilia (genus), Orbiliaceae (family), Orbiliales (order), Orbiliomycetes (class), Pezizomycotina (subphylum), saccharomyceta (no rank), Ascomycota (phylum), Dikarya (subkingdom), Fungi (kingdom), Opisthokonta (no rank), Eukaryota (superkingdom), cellular organisms (no rank)
G1XCH0_ARTOA	AOL_s00079g5	E9D6Q7	3.1e-14	no	RASRACETCHARKVRCDAASLGVPCTNCVAFSIECKIPTPKRKKASE	RRM domain-containing protein	Arthrobotrys oligospora (strain ATCC 24927 / CBS 115.81 / DSM 1491) (Nematode-trapping fungus) (Didymozoophaga oligospora)	Pathogen	Orbilia oligospora (species), Orbilia (genus), Orbiliaceae (family), Orbiliales (order), Orbiliomycetes (class), Pezizomycotina (subphylum), saccharomyceta (no rank), Ascomycota (phylum), Dikarya (subkingdom), Fungi (kingdom), Opisthokonta (no rank), Eukaryota (superkingdom), cellular organisms (no rank)
G1XCY9_ARTOA	AOL_s00079g92	U1G5N0	4.3e-14	no	RTSHACEPCRTRKTKCNGErPSCRHCLDFKITCYYGDGKRERAKK	Fungal_trans domain-containing protein	Arthrobotrys oligospora (strain ATCC 24927 / CBS 115.81 / DSM 1491) (Nematode-trapping fungus) (Didymozoophaga oligospora)	Pathogen	Orbilia oligospora (species), Orbilia (genus), Orbiliaceae (family), Orbiliales (order), Orbiliomycetes (class), Pezizomycotina (subphylum), saccharomyceta (no rank), Ascomycota (phylum), Dikarya (subkingdom), Fungi (kingdom), Opisthokonta (no rank), Eukaryota (superkingdom), cellular organisms (no rank)
G1XJ39_ARTOA	AOL_s00097g366	W7HHS6	9.5e-16	no	VLTQACENCRRRKVKCNRQDPCSNCMTSNLECRPAKRVIEHRPR	Fungal_trans domain-containing protein	Arthrobotrys oligospora (strain ATCC 24927 / CBS 115.81 / DSM 1491) (Nematode-trapping fungus) (Didymozoophaga oligospora)	Pathogen	Orbilia oligospora (species), Orbilia (genus), Orbiliaceae (family), Orbiliales (order), Orbiliomycetes (class), Pezizomycotina (subphylum), saccharomyceta (no rank), Ascomycota (phylum), Dikarya (subkingdom), Fungi (kingdom), Opisthokonta (no rank), Eukaryota (superkingdom), cellular organisms (no rank)
G1XN50_ARTOA	AOL_s00169g253	A0A1Y2W0Y2	1.1e-09	no	QSCWECKRRKTRCTFATPRNSVCDGCKSRRTRCIGQ	Fungal_trans domain-containing protein	Arthrobotrys oligospora (strain ATCC 24927 / CBS 115.81 / DSM 1491) (Nematode-trapping fungus) (Didymozoophaga oligospora)	Pathogen	Orbilia oligospora (species), Orbilia (genus), Orbiliaceae (family), Orbiliales (order), Orbiliomycetes (class), Pezizomycotina (subphylum), saccharomyceta (no rank), Ascomycota (phylum), Dikarya (subkingdom), Fungi (kingdom), Opisthokonta (no rank), Eukaryota (superkingdom), cellular organisms (no rank)
G1XNZ1_ARTOA	AOL_s00173g159	A0A178ZP99	9.9e-15	no	GLRKTCDQCRSRKVRCDRETPCSNCRITQRECSFTGALQKPRAA	Fungal_trans domain-containing protein	Arthrobotrys oligospora (strain ATCC 24927 / CBS 115.81 / DSM 1491) (Nematode-trapping fungus) (Didymozoophaga oligospora)	Pathogen	Orbilia oligospora (species), Orbilia (genus), Orbiliaceae (family), Orbiliales (order), Orbiliomycetes (class), Pezizomycotina (subphylum), saccharomyceta (no rank), Ascomycota (phylum), Dikarya (subkingdom), Fungi (kingdom), Opisthokonta (no rank), Eukaryota (superkingdom), cellular organisms (no rank)
G1XPJ9_ARTOA	AOL_s00173g367	I8TFH4	2.4e-16	no	ACDQCRSKKTKCDEDRPRCSTCSRNGLDCHYAETKPTK	Fungal_trans domain-containing protein	Arthrobotrys oligospora (strain ATCC 24927 / CBS 115.81 / DSM 1491) (Nematode-trapping fungus) (Didymozoophaga oligospora)	Pathogen	Orbilia oligospora (species), Orbilia (genus), Orbiliaceae (family), Orbiliales (order), Orbiliomycetes (class), Pezizomycotina (subphylum), saccharomyceta (no rank), Ascomycota (phylum), Dikarya (subkingdom), Fungi (kingdom), Opisthokonta (no rank), Eukaryota (superkingdom), cellular organisms (no rank)
G1XRA7_ARTOA	AOL_s00193g106	S8AF83	6.4e-17	no	IKVPACMSCHSrKIKCDRTRPCQNCVRYGVDCTSAEDDIAYPSS	Fungal_trans domain-containing protein	Arthrobotrys oligospora (strain ATCC 24927 / CBS 115.81 / DSM 1491) (Nematode-trapping fungus) (Didymozoophaga oligospora)	Pathogen	Orbilia oligospora (species), Orbilia (genus), Orbiliaceae (family), Orbiliales (order), Orbiliomycetes (class), Pezizomycotina (subphylum), saccharomyceta (no rank), Ascomycota (phylum), Dikarya (subkingdom), Fungi (kingdom), Opisthokonta (no rank), Eukaryota (superkingdom), cellular organisms (no rank)
D4AV83_ARTBC	ARB_00092	A0A022Y4B5	7.3e-13	no	SKARAcAECKRHKIKCEVKPGETSCTKCLKSGAKCVANDFSQRFVDD	Fungal_trans domain-containing protein	Arthroderma benhamiae (strain ATCC MYA-4681 / CBS 112371) (Trichophyton mentagrophytes)	Pathogen	Arthroderma benhamiae (species), Trichophyton (genus), Arthrodermataceae (family), Onygenales (order), Eurotiomycetidae (subclass), Eurotiomycetes (class), leotiomyceta (no rank), Pezizomycotina (subphylum), saccharomyceta (no rank), Ascomycota (phylum), Dikarya (subkingdom), Fungi (kingdom), Opisthokonta (no rank), Eukaryota (superkingdom), cellular organisms (no rank)
D4AVS9_ARTBC	ARB_00293	A0A178FQA9	5.8e-12	no	PVKRACNECRQQKLRCDVVQDPFTTCTRCHRLKLPCKIEANFRRIGKR	C6 transcription factor, putative	Arthroderma benhamiae (strain ATCC MYA-4681 / CBS 112371) (Trichophyton mentagrophytes)	Pathogen	Arthroderma benhamiae (species), Trichophyton (genus), Arthrodermataceae (family), Onygenales (order), Eurotiomycetidae (subclass), Eurotiomycetes (class), leotiomyceta (no rank), Pezizomycotina (subphylum), saccharomyceta (no rank), Ascomycota (phylum), Dikarya (subkingdom), Fungi (kingdom), Opisthokonta (no rank), Eukaryota (superkingdom), cellular organisms (no rank)
D4AVT1_ARTBC	ARB_00295	A0A059JG38	1.3e-12	no	SHKVRACDLCRKRKSRCTVDLPGQSCLLCRVQGADCHYGEDKSNLID	Fungal_trans domain-containing protein	Arthroderma benhamiae (strain ATCC MYA-4681 / CBS 112371) (Trichophyton mentagrophytes)	Pathogen	Arthroderma benhamiae (species), Trichophyton (genus), Arthrodermataceae (family), Onygenales (order), Eurotiomycetidae (subclass), Eurotiomycetes (class), leotiomyceta (no rank), Pezizomycotina (subphylum), saccharomyceta (no rank), Ascomycota (phylum), Dikarya (subkingdom), Fungi (kingdom), Opisthokonta (no rank), Eukaryota (superkingdom), cellular organisms (no rank)
D4AWG6_ARTBC	ARB_00531	C4JZU8	5.2e-07	no	GVETSACDACYQNNAPCAMKRDASICYACDSNHQECTFYISNQAGKR	C6 transcription factor (OTam), putative	Arthroderma benhamiae (strain ATCC MYA-4681 / CBS 112371) (Trichophyton mentagrophytes)	Pathogen	Arthroderma benhamiae (species), Trichophyton (genus), Arthrodermataceae (family), Onygenales (order), Eurotiomycetidae (subclass), Eurotiomycetes (class), leotiomyceta (no rank), Pezizomycotina (subphylum), saccharomyceta (no rank), Ascomycota (phylum), Dikarya (subkingdom), Fungi (kingdom), Opisthokonta (no rank), Eukaryota (superkingdom), cellular organisms (no rank)
D4AWP6_ARTBC	ARB_00612	A0A022XM06	6.7e-10	no	AAAAACTPCRTVKMKCTRDPDSASCNRCKRKSLSCFYESHRRGRKPG	Fungal_trans domain-containing protein	Arthroderma benhamiae (strain ATCC MYA-4681 / CBS 112371) (Trichophyton mentagrophytes)	Pathogen	Arthroderma benhamiae (species), Trichophyton (genus), Arthrodermataceae (family), Onygenales (order), Eurotiomycetidae (subclass), Eurotiomycetes (class), leotiomyceta (no rank), Pezizomycotina (subphylum), saccharomyceta (no rank), Ascomycota (phylum), Dikarya (subkingdom), Fungi (kingdom), Opisthokonta (no rank), Eukaryota (superkingdom), cellular organisms (no rank)
D4AXL3_ARTBC	ARB_00932	A0A022XM51	2.1e-14	no	PVMVsCELCKQRKVKCdRSQPSCGWCARNGHPCEYKERKKPGLRA	C6 transcription factor, putative	Arthroderma benhamiae (strain ATCC MYA-4681 / CBS 112371) (Trichophyton mentagrophytes)	Pathogen	Arthroderma benhamiae (species), Trichophyton (genus), Arthrodermataceae (family), Onygenales (order), Eurotiomycetidae (subclass), Eurotiomycetes (class), leotiomyceta (no rank), Pezizomycotina (subphylum), saccharomyceta (no rank), Ascomycota (phylum), Dikarya (subkingdom), Fungi (kingdom), Opisthokonta (no rank), Eukaryota (superkingdom), cellular organisms (no rank)
D4AZB1_ARTBC	ARB_01531	A0A0G4PGS9	8.5e-14	no	LSVCDQCRAKKIRCSREKPSCRNCNRLGLQCEWSGQGKRCNQ	C6 transcription factor, putative	Arthroderma benhamiae (strain ATCC MYA-4681 / CBS 112371) (Trichophyton mentagrophytes)	Pathogen	Arthroderma benhamiae (species), Trichophyton (genus), Arthrodermataceae (family), Onygenales (order), Eurotiomycetidae (subclass), Eurotiomycetes (class), leotiomyceta (no rank), Pezizomycotina (subphylum), saccharomyceta (no rank), Ascomycota (phylum), Dikarya (subkingdom), Fungi (kingdom), Opisthokonta (no rank), Eukaryota (superkingdom), cellular organisms (no rank)
D4B063_ARTBC	ARB_01834	F2S1E5	5.1e-14	no	PMPLSCRTCRKRKSRCSGEQPVCKTCTDYGHTCLGYSDPASAQPA	C6 transcription factor, putative	Arthroderma benhamiae (strain ATCC MYA-4681 / CBS 112371) (Trichophyton mentagrophytes)	Pathogen	Arthroderma benhamiae (species), Trichophyton (genus), Arthrodermataceae (family), Onygenales (order), Eurotiomycetidae (subclass), Eurotiomycetes (class), leotiomyceta (no rank), Pezizomycotina (subphylum), saccharomyceta (no rank), Ascomycota (phylum), Dikarya (subkingdom), Fungi (kingdom), Opisthokonta (no rank), Eukaryota (superkingdom), cellular organisms (no rank)
D4B0Y2_ARTBC	ARB_02110	A0A022Y6R7	1.2e-16	no	KSAFSCEACRKRKVKCNAATPSCSRCSARGETCVYTlTPTLSYTR	C6 transcription factor, putative	Arthroderma benhamiae (strain ATCC MYA-4681 / CBS 112371) (Trichophyton mentagrophytes)	Pathogen	Arthroderma benhamiae (species), Trichophyton (genus), Arthrodermataceae (family), Onygenales (order), Eurotiomycetidae (subclass), Eurotiomycetes (class), leotiomyceta (no rank), Pezizomycotina (subphylum), saccharomyceta (no rank), Ascomycota (phylum), Dikarya (subkingdom), Fungi (kingdom), Opisthokonta (no rank), Eukaryota (superkingdom), cellular organisms (no rank)
D4B1B8_ARTBC	ARB_02247	A0A059JIY9	8.5e-17	no	RTRVSYSCHTCRRRKVKCDKVHPVCGNCVKTGTECMYDSTAAAA	C6 transcription factor, putative	Arthroderma benhamiae (strain ATCC MYA-4681 / CBS 112371) (Trichophyton mentagrophytes)	Pathogen	Arthroderma benhamiae (species), Trichophyton (genus), Arthrodermataceae (family), Onygenales (order), Eurotiomycetidae (subclass), Eurotiomycetes (class), leotiomyceta (no rank), Pezizomycotina (subphylum), saccharomyceta (no rank), Ascomycota (phylum), Dikarya (subkingdom), Fungi (kingdom), Opisthokonta (no rank), Eukaryota (superkingdom), cellular organisms (no rank)
D4B2E7_ARTBC	ARB_02675	A0A059IYV0	1.3e-12	no	YISLAcNECKRRKIKCNGQVPCQRCGHLSLEcLYSPNCCQSNFKDS	C6 transcription factor, putative	Arthroderma benhamiae (strain ATCC MYA-4681 / CBS 112371) (Trichophyton mentagrophytes)	Pathogen	Arthroderma benhamiae (species), Trichophyton (genus), Arthrodermataceae (family), Onygenales (order), Eurotiomycetidae (subclass), Eurotiomycetes (class), leotiomyceta (no rank), Pezizomycotina (subphylum), saccharomyceta (no rank), Ascomycota (phylum), Dikarya (subkingdom), Fungi (kingdom), Opisthokonta (no rank), Eukaryota (superkingdom), cellular organisms (no rank)
D4B2F4_ARTBC	ARB_02682	A0A022XR97	9.9e-14	no	ALQRACDNCRLRKIKCDRTSPCSNCRIGKTICRTTPRVKEQRQR	C6 transcription factor, putative	Arthroderma benhamiae (strain ATCC MYA-4681 / CBS 112371) (Trichophyton mentagrophytes)	Pathogen	Arthroderma benhamiae (species), Trichophyton (genus), Arthrodermataceae (family), Onygenales (order), Eurotiomycetidae (subclass), Eurotiomycetes (class), leotiomyceta (no rank), Pezizomycotina (subphylum), saccharomyceta (no rank), Ascomycota (phylum), Dikarya (subkingdom), Fungi (kingdom), Opisthokonta (no rank), Eukaryota (superkingdom), cellular organisms (no rank)
D4B3E6_ARTBC	ARB_02983	A0A022XWC2	5.5e-11	no	SSIACSRCRRSKIKCVNAGIDTTCRACESSGRECSYPTP	C6 transcription factor, putative	Arthroderma benhamiae (strain ATCC MYA-4681 / CBS 112371) (Trichophyton mentagrophytes)	Pathogen	Arthroderma benhamiae (species), Trichophyton (genus), Arthrodermataceae (family), Onygenales (order), Eurotiomycetidae (subclass), Eurotiomycetes (class), leotiomyceta (no rank), Pezizomycotina (subphylum), saccharomyceta (no rank), Ascomycota (phylum), Dikarya (subkingdom), Fungi (kingdom), Opisthokonta (no rank), Eukaryota (superkingdom), cellular organisms (no rank)
D4B3F6_ARTBC	ARB_02993	F2S3C7	1.4e-15	no	TRAVQSCVRCRRMKVRCDRRLPCGRCSKINRECVYLIEEPGLSHG	C6 transcription factor, putative	Arthroderma benhamiae (strain ATCC MYA-4681 / CBS 112371) (Trichophyton mentagrophytes)	Pathogen	Arthroderma benhamiae (species), Trichophyton (genus), Arthrodermataceae (family), Onygenales (order), Eurotiomycetidae (subclass), Eurotiomycetes (class), leotiomyceta (no rank), Pezizomycotina (subphylum), saccharomyceta (no rank), Ascomycota (phylum), Dikarya (subkingdom), Fungi (kingdom), Opisthokonta (no rank), Eukaryota (superkingdom), cellular organisms (no rank)
D4B576_ARTBC	ARB_03602	A0A178FB58	4e-14	no	QEPVSCRFCRSKKLKCTREFPCANCRQRNIECVPSYiRKVETKH	C6 transcription factor, putative	Arthroderma benhamiae (strain ATCC MYA-4681 / CBS 112371) (Trichophyton mentagrophytes)	Pathogen	Arthroderma benhamiae (species), Trichophyton (genus), Arthrodermataceae (family), Onygenales (order), Eurotiomycetidae (subclass), Eurotiomycetes (class), leotiomyceta (no rank), Pezizomycotina (subphylum), saccharomyceta (no rank), Ascomycota (phylum), Dikarya (subkingdom), Fungi (kingdom), Opisthokonta (no rank), Eukaryota (superkingdom), cellular organisms (no rank)
D4B546_ARTBC	ARB_03609	F2SPA1	6.4e-14	no	GKPTSCEPCRISKVRCDHVMPICQRCVKKGISEKCYYHEAPLTRVKD	C6 transcription factor, putative	Arthroderma benhamiae (strain ATCC MYA-4681 / CBS 112371) (Trichophyton mentagrophytes)	Pathogen	Arthroderma benhamiae (species), Trichophyton (genus), Arthrodermataceae (family), Onygenales (order), Eurotiomycetidae (subclass), Eurotiomycetes (class), leotiomyceta (no rank), Pezizomycotina (subphylum), saccharomyceta (no rank), Ascomycota (phylum), Dikarya (subkingdom), Fungi (kingdom), Opisthokonta (no rank), Eukaryota (superkingdom), cellular organisms (no rank)
D4B5E0_ARTBC	ARB_03680	A0A178F447	3.3e-14	no	SKAQTCESCRAAHSKCDGRTPtCTSCRQRNEPCQYSYPSStLKPT	C6 transcription factor, putative	Arthroderma benhamiae (strain ATCC MYA-4681 / CBS 112371) (Trichophyton mentagrophytes)	Pathogen	Arthroderma benhamiae (species), Trichophyton (genus), Arthrodermataceae (family), Onygenales (order), Eurotiomycetidae (subclass), Eurotiomycetes (class), leotiomyceta (no rank), Pezizomycotina (subphylum), saccharomyceta (no rank), Ascomycota (phylum), Dikarya (subkingdom), Fungi (kingdom), Opisthokonta (no rank), Eukaryota (superkingdom), cellular organisms (no rank)
D4B5M9_ARTBC	ARB_03788	A0A022Y560	2.2e-14	no	AHTLTACIRCKQRKSRCDPGIPRCEPCKRSNSKCEYYDHTKEATI	Fungal_trans domain-containing protein	Arthroderma benhamiae (strain ATCC MYA-4681 / CBS 112371) (Trichophyton mentagrophytes)	Pathogen	Arthroderma benhamiae (species), Trichophyton (genus), Arthrodermataceae (family), Onygenales (order), Eurotiomycetidae (subclass), Eurotiomycetes (class), leotiomyceta (no rank), Pezizomycotina (subphylum), saccharomyceta (no rank), Ascomycota (phylum), Dikarya (subkingdom), Fungi (kingdom), Opisthokonta (no rank), Eukaryota (superkingdom), cellular organisms (no rank)
D4B609_ARTBC	ARB_03916	C4JJA3	8.5e-07	no	PTLACEPCRRKKVrRKAVILIASRCDRNLPCEQCCRSKTELCNYL	C6 transcription factor, putative	Arthroderma benhamiae (strain ATCC MYA-4681 / CBS 112371) (Trichophyton mentagrophytes)	Pathogen	Arthroderma benhamiae (species), Trichophyton (genus), Arthrodermataceae (family), Onygenales (order), Eurotiomycetidae (subclass), Eurotiomycetes (class), leotiomyceta (no rank), Pezizomycotina (subphylum), saccharomyceta (no rank), Ascomycota (phylum), Dikarya (subkingdom), Fungi (kingdom), Opisthokonta (no rank), Eukaryota (superkingdom), cellular organisms (no rank)
D4B630_ARTBC	ARB_03937	D4D670	9.9e-14	no	RPIAACSRCRSSKVKCDGKLPACSACERAGKARSCSGATDEFAKGKE	C6 transcription factor, putative	Arthroderma benhamiae (strain ATCC MYA-4681 / CBS 112371) (Trichophyton mentagrophytes)	Pathogen	Arthroderma benhamiae (species), Trichophyton (genus), Arthrodermataceae (family), Onygenales (order), Eurotiomycetidae (subclass), Eurotiomycetes (class), leotiomyceta (no rank), Pezizomycotina (subphylum), saccharomyceta (no rank), Ascomycota (phylum), Dikarya (subkingdom), Fungi (kingdom), Opisthokonta (no rank), Eukaryota (superkingdom), cellular organisms (no rank)
D4AJD3_ARTBC	ARB_04382	A0A178F6S9	2.4e-14	no	CVSTACIACRKRKSKCDGNTPSCAACSSVYHTPcVYDPNSDHRRKG	C6 transcription factor, putative	Arthroderma benhamiae (strain ATCC MYA-4681 / CBS 112371) (Trichophyton mentagrophytes)	Pathogen	Arthroderma benhamiae (species), Trichophyton (genus), Arthrodermataceae (family), Onygenales (order), Eurotiomycetidae (subclass), Eurotiomycetes (class), leotiomyceta (no rank), Pezizomycotina (subphylum), saccharomyceta (no rank), Ascomycota (phylum), Dikarya (subkingdom), Fungi (kingdom), Opisthokonta (no rank), Eukaryota (superkingdom), cellular organisms (no rank)
D4AJG6_ARTBC	ARB_04416	F2S7V3	1.8e-14	no	KILARACQFCRARKIKCDTQRPSCSSCINQKRECVYILEVPKRR	Fungal_trans domain-containing protein	Arthroderma benhamiae (strain ATCC MYA-4681 / CBS 112371) (Trichophyton mentagrophytes)	Pathogen	Arthroderma benhamiae (species), Trichophyton (genus), Arthrodermataceae (family), Onygenales (order), Eurotiomycetidae (subclass), Eurotiomycetes (class), leotiomyceta (no rank), Pezizomycotina (subphylum), saccharomyceta (no rank), Ascomycota (phylum), Dikarya (subkingdom), Fungi (kingdom), Opisthokonta (no rank), Eukaryota (superkingdom), cellular organisms (no rank)
D4APW7_ARTBC	ARB_05822	A0A022XYM1	5.6e-14	no	RASRACETCHARKVRCDAASLGVPCTNCVAFSIECKIPSPRRKKNQA	C6 transcription factor, putative	Arthroderma benhamiae (strain ATCC MYA-4681 / CBS 112371) (Trichophyton mentagrophytes)	Pathogen	Arthroderma benhamiae (species), Trichophyton (genus), Arthrodermataceae (family), Onygenales (order), Eurotiomycetidae (subclass), Eurotiomycetes (class), leotiomyceta (no rank), Pezizomycotina (subphylum), saccharomyceta (no rank), Ascomycota (phylum), Dikarya (subkingdom), Fungi (kingdom), Opisthokonta (no rank), Eukaryota (superkingdom), cellular organisms (no rank)
D4AP55_ARTBC	ARB_06022	A1CD07	1.8e-14	no	RPAvACSLCRRRKIRCNRGQPCSNCVRSRAKSCLYEHPLPPQFDT	C6 transcription factor, putative	Arthroderma benhamiae (strain ATCC MYA-4681 / CBS 112371) (Trichophyton mentagrophytes)	Pathogen	Arthroderma benhamiae (species), Trichophyton (genus), Arthrodermataceae (family), Onygenales (order), Eurotiomycetidae (subclass), Eurotiomycetes (class), leotiomyceta (no rank), Pezizomycotina (subphylum), saccharomyceta (no rank), Ascomycota (phylum), Dikarya (subkingdom), Fungi (kingdom), Opisthokonta (no rank), Eukaryota (superkingdom), cellular organisms (no rank)
D4APT8_ARTBC	ARB_06256	E4V3E6	1e-10	no	AASACVACNKKKIRCIYPDGGQQCSNCARNHWTCsP	C6 transcription factor, putative	Arthroderma benhamiae (strain ATCC MYA-4681 / CBS 112371) (Trichophyton mentagrophytes)	Pathogen	Arthroderma benhamiae (species), Trichophyton (genus), Arthrodermataceae (family), Onygenales (order), Eurotiomycetidae (subclass), Eurotiomycetes (class), leotiomyceta (no rank), Pezizomycotina (subphylum), saccharomyceta (no rank), Ascomycota (phylum), Dikarya (subkingdom), Fungi (kingdom), Opisthokonta (no rank), Eukaryota (superkingdom), cellular organisms (no rank)
D4AQP5_ARTBC	ARB_06555	A0A022XJY7	3.3e-13	no	NRVPVSCAPCRNRKLKCNRATPCENCVKRDDIASCSYAQSTNRRRY	Fungal_trans domain-containing protein	Arthroderma benhamiae (strain ATCC MYA-4681 / CBS 112371) (Trichophyton mentagrophytes)	Pathogen	Arthroderma benhamiae (species), Trichophyton (genus), Arthrodermataceae (family), Onygenales (order), Eurotiomycetidae (subclass), Eurotiomycetes (class), leotiomyceta (no rank), Pezizomycotina (subphylum), saccharomyceta (no rank), Ascomycota (phylum), Dikarya (subkingdom), Fungi (kingdom), Opisthokonta (no rank), Eukaryota (superkingdom), cellular organisms (no rank)
D4ATH5_ARTBC	ARB_07539	A0A059J2R5	1.5e-12	no	VLRKSCHFCRSRKIRCSGQSICEACQERNIDCVYDLEAAKGRPK	Fungal_trans domain-containing protein	Arthroderma benhamiae (strain ATCC MYA-4681 / CBS 112371) (Trichophyton mentagrophytes)	Pathogen	Arthroderma benhamiae (species), Trichophyton (genus), Arthrodermataceae (family), Onygenales (order), Eurotiomycetidae (subclass), Eurotiomycetes (class), leotiomyceta (no rank), Pezizomycotina (subphylum), saccharomyceta (no rank), Ascomycota (phylum), Dikarya (subkingdom), Fungi (kingdom), Opisthokonta (no rank), Eukaryota (superkingdom), cellular organisms (no rank)
D4AU94_ARTBC	ARB_07724	A0A178ETU7	3.1e-14	no	LPVSCEPCRKRKIRCPRNGPPCDTCIRRGLGMADCFFLGQSRNQLNAS	Fungal_trans domain-containing protein	Arthroderma benhamiae (strain ATCC MYA-4681 / CBS 112371) (Trichophyton mentagrophytes)	Pathogen	Arthroderma benhamiae (species), Trichophyton (genus), Arthrodermataceae (family), Onygenales (order), Eurotiomycetidae (subclass), Eurotiomycetes (class), leotiomyceta (no rank), Pezizomycotina (subphylum), saccharomyceta (no rank), Ascomycota (phylum), Dikarya (subkingdom), Fungi (kingdom), Opisthokonta (no rank), Eukaryota (superkingdom), cellular organisms (no rank)
D4AUQ0_ARTBC	ARB_07967	A0A059J9I5	8.3e-15	no	KPQLSCNLCRRRkSRCDRQQPCSTCLARGQTCVYVENHPSLTKP	C6 transcription factor, putative	Arthroderma benhamiae (strain ATCC MYA-4681 / CBS 112371) (Trichophyton mentagrophytes)	Pathogen	Arthroderma benhamiae (species), Trichophyton (genus), Arthrodermataceae (family), Onygenales (order), Eurotiomycetidae (subclass), Eurotiomycetes (class), leotiomyceta (no rank), Pezizomycotina (subphylum), saccharomyceta (no rank), Ascomycota (phylum), Dikarya (subkingdom), Fungi (kingdom), Opisthokonta (no rank), Eukaryota (superkingdom), cellular organisms (no rank)
D4AUS0_ARTBC	ARB_07987	A0A178FJ41	4e-14	no	TRNHSCFSCQQRKVRCDGQQPCSSCRRNRIECVPGRRTKPSMHR	C6 transcription factor, putative	Arthroderma benhamiae (strain ATCC MYA-4681 / CBS 112371) (Trichophyton mentagrophytes)	Pathogen	Arthroderma benhamiae (species), Trichophyton (genus), Arthrodermataceae (family), Onygenales (order), Eurotiomycetidae (subclass), Eurotiomycetes (class), leotiomyceta (no rank), Pezizomycotina (subphylum), saccharomyceta (no rank), Ascomycota (phylum), Dikarya (subkingdom), Fungi (kingdom), Opisthokonta (no rank), Eukaryota (superkingdom), cellular organisms (no rank)
E5R2A1_ARTGP	MGYG_00034	A0A0G4PGS9	6.7e-14	no	LSVCDQCRARKIRCSREKPSCRNCNRLGLQCEWSGQGKRCNQ	Fungal_trans domain-containing protein	Arthroderma gypseum (strain ATCC MYA-4604 / CBS 118893) (Microsporum gypseum)	Pathogen	Arthroderma gypseum (species), Nannizzia (genus), Arthrodermataceae (family), Onygenales (order), Eurotiomycetidae (subclass), Eurotiomycetes (class), leotiomyceta (no rank), Pezizomycotina (subphylum), saccharomyceta (no rank), Ascomycota (phylum), Dikarya (subkingdom), Fungi (kingdom), Opisthokonta (no rank), Eukaryota (superkingdom), cellular organisms (no rank)
E4UNB2_ARTGP	MGYG_02585	C5FXR8	5.2e-12	no	RAISACDYCRSRKSRCKGIGPCEACTERGILCSLTWSSQHQD	Fungal_trans domain-containing protein	Arthroderma gypseum (strain ATCC MYA-4604 / CBS 118893) (Microsporum gypseum)	Pathogen	Arthroderma gypseum (species), Nannizzia (genus), Arthrodermataceae (family), Onygenales (order), Eurotiomycetidae (subclass), Eurotiomycetes (class), leotiomyceta (no rank), Pezizomycotina (subphylum), saccharomyceta (no rank), Ascomycota (phylum), Dikarya (subkingdom), Fungi (kingdom), Opisthokonta (no rank), Eukaryota (superkingdom), cellular organisms (no rank)
E4UPS9_ARTGP	MGYG_02911	D4AYN6	7.5e-16	no	GPAACVHCHQRKVRCDARTVGVPCSNCRTAGKLDCRIHEKKKRTAS	Acetamidase regulatory protein	Arthroderma gypseum (strain ATCC MYA-4604 / CBS 118893) (Microsporum gypseum)	Pathogen	Arthroderma gypseum (species), Nannizzia (genus), Arthrodermataceae (family), Onygenales (order), Eurotiomycetidae (subclass), Eurotiomycetes (class), leotiomyceta (no rank), Pezizomycotina (subphylum), saccharomyceta (no rank), Ascomycota (phylum), Dikarya (subkingdom), Fungi (kingdom), Opisthokonta (no rank), Eukaryota (superkingdom), cellular organisms (no rank)
E4USH4_ARTGP	MGYG_03545	A0A178FB58	5e-14	no	QEPVSCQFCRNKKLKCTREIPCANCRQRNIECIPSYtRKAEIKT	C6 zinc finger domain-containing protein	Arthroderma gypseum (strain ATCC MYA-4604 / CBS 118893) (Microsporum gypseum)	Pathogen	Arthroderma gypseum (species), Nannizzia (genus), Arthrodermataceae (family), Onygenales (order), Eurotiomycetidae (subclass), Eurotiomycetes (class), leotiomyceta (no rank), Pezizomycotina (subphylum), saccharomyceta (no rank), Ascomycota (phylum), Dikarya (subkingdom), Fungi (kingdom), Opisthokonta (no rank), Eukaryota (superkingdom), cellular organisms (no rank)
E4UU41_ARTGP	MGYG_03813	A1CD07	1.9e-14	no	RPPvACSLCRRRKIRCNREEPCSNCVRSRAKACLYERKSTQVSPH	C6 zinc finger domain-containing protein	Arthroderma gypseum (strain ATCC MYA-4604 / CBS 118893) (Microsporum gypseum)	Pathogen	Arthroderma gypseum (species), Nannizzia (genus), Arthrodermataceae (family), Onygenales (order), Eurotiomycetidae (subclass), Eurotiomycetes (class), leotiomyceta (no rank), Pezizomycotina (subphylum), saccharomyceta (no rank), Ascomycota (phylum), Dikarya (subkingdom), Fungi (kingdom), Opisthokonta (no rank), Eukaryota (superkingdom), cellular organisms (no rank)
E4V1R5_ARTGP	MGYG_06983	A0A059JIG3	3.3e-17	no	RVNHACEPCRKRKSKCDGVHPVCSRCKNQGVDCIYADGKRERLKr	Fungal_trans domain-containing protein	Arthroderma gypseum (strain ATCC MYA-4604 / CBS 118893) (Microsporum gypseum)	Pathogen	Arthroderma gypseum (species), Nannizzia (genus), Arthrodermataceae (family), Onygenales (order), Eurotiomycetidae (subclass), Eurotiomycetes (class), leotiomyceta (no rank), Pezizomycotina (subphylum), saccharomyceta (no rank), Ascomycota (phylum), Dikarya (subkingdom), Fungi (kingdom), Opisthokonta (no rank), Eukaryota (superkingdom), cellular organisms (no rank)
E4V259_ARTGP	MGYG_07131	A0A022Y6R7	1.2e-16	no	KSAFSCEACRKRKVKCNAATPSCSRCSARGETCVYTlTPTLSYTR	Fungal_trans domain-containing protein	Arthroderma gypseum (strain ATCC MYA-4604 / CBS 118893) (Microsporum gypseum)	Pathogen	Arthroderma gypseum (species), Nannizzia (genus), Arthrodermataceae (family), Onygenales (order), Eurotiomycetidae (subclass), Eurotiomycetes (class), leotiomyceta (no rank), Pezizomycotina (subphylum), saccharomyceta (no rank), Ascomycota (phylum), Dikarya (subkingdom), Fungi (kingdom), Opisthokonta (no rank), Eukaryota (superkingdom), cellular organisms (no rank)
E4V2U9_ARTGP	MGYG_07330	B6H5S0	7.4e-16	no	PGRLACDICRErKVRCDRADPQCGRCGRLGYECSYQGRKRHRVAQ	Fungal_trans domain-containing protein	Arthroderma gypseum (strain ATCC MYA-4604 / CBS 118893) (Microsporum gypseum)	Pathogen	Arthroderma gypseum (species), Nannizzia (genus), Arthrodermataceae (family), Onygenales (order), Eurotiomycetidae (subclass), Eurotiomycetes (class), leotiomyceta (no rank), Pezizomycotina (subphylum), saccharomyceta (no rank), Ascomycota (phylum), Dikarya (subkingdom), Fungi (kingdom), Opisthokonta (no rank), Eukaryota (superkingdom), cellular organisms (no rank)
E4V6I1_ARTGP	MGYG_08621	C4JJA3	4.2e-07	no	PTLACEPCRRKKVRMNVKRKVPKLCNRNLPCEQCSRSKTELCTYL	C6 zinc finger domain-containing protein	Arthroderma gypseum (strain ATCC MYA-4604 / CBS 118893) (Microsporum gypseum)	Pathogen	Arthroderma gypseum (species), Nannizzia (genus), Arthrodermataceae (family), Onygenales (order), Eurotiomycetidae (subclass), Eurotiomycetes (class), leotiomyceta (no rank), Pezizomycotina (subphylum), saccharomyceta (no rank), Ascomycota (phylum), Dikarya (subkingdom), Fungi (kingdom), Opisthokonta (no rank), Eukaryota (superkingdom), cellular organisms (no rank)
E4V6Y4_ARTGP	MGYG_08771	A0A0G4PYR3	1.6e-14	no	ASCEPCRKHKVRCDHAQPVCARCRQRGSESQCFYHPAPLT	Fungal_trans domain-containing protein	Arthroderma gypseum (strain ATCC MYA-4604 / CBS 118893) (Microsporum gypseum)	Pathogen	Arthroderma gypseum (species), Nannizzia (genus), Arthrodermataceae (family), Onygenales (order), Eurotiomycetidae (subclass), Eurotiomycetes (class), leotiomyceta (no rank), Pezizomycotina (subphylum), saccharomyceta (no rank), Ascomycota (phylum), Dikarya (subkingdom), Fungi (kingdom), Opisthokonta (no rank), Eukaryota (superkingdom), cellular organisms (no rank)
C5FCH7_ARTOC	MCYG_00309	A0A022XF30	1.1e-13	no	RLPVSCEPCRKRKIRCPRNGPPCDTCIRRGLGMADCFFLGQARNPLNA	C6 zinc finger domain-containing protein	Arthroderma otae (strain ATCC MYA-4605 / CBS 113480) (Microsporum canis)	Pathogen	Arthroderma otae (species), Microsporum (genus), Arthrodermataceae (family), Onygenales (order), Eurotiomycetidae (subclass), Eurotiomycetes (class), leotiomyceta (no rank), Pezizomycotina (subphylum), saccharomyceta (no rank), Ascomycota (phylum), Dikarya (subkingdom), Fungi (kingdom), Opisthokonta (no rank), Eukaryota (superkingdom), cellular organisms (no rank)
C5FF53_ARTOC	MCYG_01325	A0A022XR97	9.9e-14	no	ASQRACDNCRLRKIKCDRTSPCSNCRIGKTICRTTPRVKEQRQR	Fungal specific transcription factor domain-containing protein	Arthroderma otae (strain ATCC MYA-4605 / CBS 113480) (Microsporum canis)	Pathogen	Arthroderma otae (species), Microsporum (genus), Arthrodermataceae (family), Onygenales (order), Eurotiomycetidae (subclass), Eurotiomycetes (class), leotiomyceta (no rank), Pezizomycotina (subphylum), saccharomyceta (no rank), Ascomycota (phylum), Dikarya (subkingdom), Fungi (kingdom), Opisthokonta (no rank), Eukaryota (superkingdom), cellular organisms (no rank)
C5FF60_ARTOC	MCYG_01332	E5QYJ7	1.3e-12	no	YISLAcNECKRRKIKCNGQVPCQRCGHLSLEcLYSPNCCQSNFKDS	Fungal specific transcription factor domain-containing protein	Arthroderma otae (strain ATCC MYA-4605 / CBS 113480) (Microsporum canis)	Pathogen	Arthroderma otae (species), Microsporum (genus), Arthrodermataceae (family), Onygenales (order), Eurotiomycetidae (subclass), Eurotiomycetes (class), leotiomyceta (no rank), Pezizomycotina (subphylum), saccharomyceta (no rank), Ascomycota (phylum), Dikarya (subkingdom), Fungi (kingdom), Opisthokonta (no rank), Eukaryota (superkingdom), cellular organisms (no rank)
C5FIS1_ARTOC	MCYG_01981	E4V4F5	7e-11	no	RKGTRSCWECKRRKLKCSFSSAADSVCQSCRRRGTSCISQKYPEEIAI	C6 zinc finger domain-containing protein	Arthroderma otae (strain ATCC MYA-4605 / CBS 113480) (Microsporum canis)	Pathogen	Arthroderma otae (species), Microsporum (genus), Arthrodermataceae (family), Onygenales (order), Eurotiomycetidae (subclass), Eurotiomycetes (class), leotiomyceta (no rank), Pezizomycotina (subphylum), saccharomyceta (no rank), Ascomycota (phylum), Dikarya (subkingdom), Fungi (kingdom), Opisthokonta (no rank), Eukaryota (superkingdom), cellular organisms (no rank)
C5FG67_ARTOC	MCYG_02571	A0A178FKU1	5.6e-14	no	RASRACETCHARKVRCDAASLGVPCTNCVAFSIECKIPSPRRKKNQA	Fungal specific transcription factor domain-containing protein	Arthroderma otae (strain ATCC MYA-4605 / CBS 113480) (Microsporum canis)	Pathogen	Arthroderma otae (species), Microsporum (genus), Arthrodermataceae (family), Onygenales (order), Eurotiomycetidae (subclass), Eurotiomycetes (class), leotiomyceta (no rank), Pezizomycotina (subphylum), saccharomyceta (no rank), Ascomycota (phylum), Dikarya (subkingdom), Fungi (kingdom), Opisthokonta (no rank), Eukaryota (superkingdom), cellular organisms (no rank)
C5FMV2_ARTOC	MCYG_04007	A0A2J5HTH5	2.5e-11	no	GKLSSCEPCRISKLRCDHSSPVCSRCIARCQEDQCIYHPAPLTRSQK	Fungal_trans domain-containing protein	Arthroderma otae (strain ATCC MYA-4605 / CBS 113480) (Microsporum canis)	Pathogen	Arthroderma otae (species), Microsporum (genus), Arthrodermataceae (family), Onygenales (order), Eurotiomycetidae (subclass), Eurotiomycetes (class), leotiomyceta (no rank), Pezizomycotina (subphylum), saccharomyceta (no rank), Ascomycota (phylum), Dikarya (subkingdom), Fungi (kingdom), Opisthokonta (no rank), Eukaryota (superkingdom), cellular organisms (no rank)
C5FQS4_ARTOC	MCYG_05046	A1CD07	3.6e-15	no	RPAvACALCRKRKIRCNREKPCSNCMRSGARPCSYENSFLPPQQH	C6 zinc finger domain-containing protein	Arthroderma otae (strain ATCC MYA-4605 / CBS 113480) (Microsporum canis)	Pathogen	Arthroderma otae (species), Microsporum (genus), Arthrodermataceae (family), Onygenales (order), Eurotiomycetidae (subclass), Eurotiomycetes (class), leotiomyceta (no rank), Pezizomycotina (subphylum), saccharomyceta (no rank), Ascomycota (phylum), Dikarya (subkingdom), Fungi (kingdom), Opisthokonta (no rank), Eukaryota (superkingdom), cellular organisms (no rank)
C5FR30_ARTOC	MCYG_05152	E4V0Q6	2.3e-14	no	RCVSTACIACRKRKSKCDGNTPSCAACSSVYHTPCVYDPNSDHRRK	Nitrogen assimilation transcription factor nirA	Arthroderma otae (strain ATCC MYA-4605 / CBS 113480) (Microsporum canis)	Pathogen	Arthroderma otae (species), Microsporum (genus), Arthrodermataceae (family), Onygenales (order), Eurotiomycetidae (subclass), Eurotiomycetes (class), leotiomyceta (no rank), Pezizomycotina (subphylum), saccharomyceta (no rank), Ascomycota (phylum), Dikarya (subkingdom), Fungi (kingdom), Opisthokonta (no rank), Eukaryota (superkingdom), cellular organisms (no rank)
C5FTW0_ARTOC	MCYG_06163	C4JZU8	9.7e-07	no	AVINSCEPCYRRTTRCAMKQNASKCHSCDFRYQECTSNINNHVGKRK	Nitrogen regulatory protein OTam	Arthroderma otae (strain ATCC MYA-4605 / CBS 113480) (Microsporum canis)	Pathogen	Arthroderma otae (species), Microsporum (genus), Arthrodermataceae (family), Onygenales (order), Eurotiomycetidae (subclass), Eurotiomycetes (class), leotiomyceta (no rank), Pezizomycotina (subphylum), saccharomyceta (no rank), Ascomycota (phylum), Dikarya (subkingdom), Fungi (kingdom), Opisthokonta (no rank), Eukaryota (superkingdom), cellular organisms (no rank)
C5FUV4_ARTOC	MCYG_06507	A0A059JIG3	5.6e-17	no	RVNHACEPCRKRKSKCDGVHPICSRCKNQGVDCIYADGKRERLKr	Fungal_trans domain-containing protein	Arthroderma otae (strain ATCC MYA-4605 / CBS 113480) (Microsporum canis)	Pathogen	Arthroderma otae (species), Microsporum (genus), Arthrodermataceae (family), Onygenales (order), Eurotiomycetidae (subclass), Eurotiomycetes (class), leotiomyceta (no rank), Pezizomycotina (subphylum), saccharomyceta (no rank), Ascomycota (phylum), Dikarya (subkingdom), Fungi (kingdom), Opisthokonta (no rank), Eukaryota (superkingdom), cellular organisms (no rank)
C5FV05_ARTOC	MCYG_06558	A0A178F735	2.4e-14	no	RVIAaCRTCRKRKSRCSGEKPvCKTCTDYGHTCLGYSEPTNAQSA	Pathway-specific nitrogen regulator	Arthroderma otae (strain ATCC MYA-4605 / CBS 113480) (Microsporum canis)	Pathogen	Arthroderma otae (species), Microsporum (genus), Arthrodermataceae (family), Onygenales (order), Eurotiomycetidae (subclass), Eurotiomycetes (class), leotiomyceta (no rank), Pezizomycotina (subphylum), saccharomyceta (no rank), Ascomycota (phylum), Dikarya (subkingdom), Fungi (kingdom), Opisthokonta (no rank), Eukaryota (superkingdom), cellular organisms (no rank)
C5FV38_ARTOC	MCYG_06591	A0A0U1M1M2	3.2e-12	no	KRVSRACYNCRRRKSKCDLDSNGRPGQPPCKRCHNENLKCELGTSNRGGKR	C6 zinc finger domain-containing protein	Arthroderma otae (strain ATCC MYA-4605 / CBS 113480) (Microsporum canis)	Pathogen	Arthroderma otae (species), Microsporum (genus), Arthrodermataceae (family), Onygenales (order), Eurotiomycetidae (subclass), Eurotiomycetes (class), leotiomyceta (no rank), Pezizomycotina (subphylum), saccharomyceta (no rank), Ascomycota (phylum), Dikarya (subkingdom), Fungi (kingdom), Opisthokonta (no rank), Eukaryota (superkingdom), cellular organisms (no rank)
C5FWE2_ARTOC	MCYG_07045	A0A178FB58	9.8e-15	no	QDPVSCQFCRSKKLKCTREFPCANCRLRNIECVPSYNSeYEAKP	C6 zinc finger domain-containing protein	Arthroderma otae (strain ATCC MYA-4605 / CBS 113480) (Microsporum canis)	Pathogen	Arthroderma otae (species), Microsporum (genus), Arthrodermataceae (family), Onygenales (order), Eurotiomycetidae (subclass), Eurotiomycetes (class), leotiomyceta (no rank), Pezizomycotina (subphylum), saccharomyceta (no rank), Ascomycota (phylum), Dikarya (subkingdom), Fungi (kingdom), Opisthokonta (no rank), Eukaryota (superkingdom), cellular organisms (no rank)
C5FYA7_ARTOC	MCYG_07324	F2PHJ1	1.3e-14	no	PVMVsCELCKQRKVKCdRTQPSCGWCARNGHPCEYKERKKPGLRA	Fungal_trans domain-containing protein	Arthroderma otae (strain ATCC MYA-4605 / CBS 113480) (Microsporum canis)	Pathogen	Arthroderma otae (species), Microsporum (genus), Arthrodermataceae (family), Onygenales (order), Eurotiomycetidae (subclass), Eurotiomycetes (class), leotiomyceta (no rank), Pezizomycotina (subphylum), saccharomyceta (no rank), Ascomycota (phylum), Dikarya (subkingdom), Fungi (kingdom), Opisthokonta (no rank), Eukaryota (superkingdom), cellular organisms (no rank)
C5FWW4_ARTOC	MCYG_07623	A0A0G4PYR3	8.3e-14	no	ASCEPCRKDKVRCDHAQPVCARCHRRGSESQCFYHPAPLTRRSR	Fungal_trans domain-containing protein	Arthroderma otae (strain ATCC MYA-4605 / CBS 113480) (Microsporum canis)	Pathogen	Arthroderma otae (species), Microsporum (genus), Arthrodermataceae (family), Onygenales (order), Eurotiomycetidae (subclass), Eurotiomycetes (class), leotiomyceta (no rank), Pezizomycotina (subphylum), saccharomyceta (no rank), Ascomycota (phylum), Dikarya (subkingdom), Fungi (kingdom), Opisthokonta (no rank), Eukaryota (superkingdom), cellular organisms (no rank)
C5G0H4_ARTOC	MCYG_08446	A0A0L0MZC0	1.1e-13	no	RRQTIVCTECRRRKIACDRNAPCTQCIQSKAACTYYSSCSSGGRF	C6 zinc finger domain-containing protein	Arthroderma otae (strain ATCC MYA-4605 / CBS 113480) (Microsporum canis)	Pathogen	Arthroderma otae (species), Microsporum (genus), Arthrodermataceae (family), Onygenales (order), Eurotiomycetidae (subclass), Eurotiomycetes (class), leotiomyceta (no rank), Pezizomycotina (subphylum), saccharomyceta (no rank), Ascomycota (phylum), Dikarya (subkingdom), Fungi (kingdom), Opisthokonta (no rank), Eukaryota (superkingdom), cellular organisms (no rank)
C5G0J3_ARTOC	MCYG_08465	C1GKY9	3.2e-12	no	QVARACDWCRVHRVKCDTNSPCNSCQSRGGECSRTRSSEVRSLS	Fungal specific transcription factor domain-containing protein	Arthroderma otae (strain ATCC MYA-4605 / CBS 113480) (Microsporum canis)	Pathogen	Arthroderma otae (species), Microsporum (genus), Arthrodermataceae (family), Onygenales (order), Eurotiomycetidae (subclass), Eurotiomycetes (class), leotiomyceta (no rank), Pezizomycotina (subphylum), saccharomyceta (no rank), Ascomycota (phylum), Dikarya (subkingdom), Fungi (kingdom), Opisthokonta (no rank), Eukaryota (superkingdom), cellular organisms (no rank)
A0A1D2VGI1_9ASCO	ASCRUDRAFT_35149	W6MXL6	1.5e-09	no	RPCDHCRRRNDPCTLLNDGTTCSHCESKSLRCTFSDNLKRSIMD	Fungal_trans domain-containing protein	Ascoidea rubescens DSM 1968	Non-Pathogen	Ascoidea rubescens (species), Ascoidea (genus), Ascoideaceae (family), CUG-Ser2 clade (no rank), Saccharomycetales (order), Saccharomycetes (class), Saccharomycotina (subphylum), saccharomyceta (no rank), Ascomycota (phylum), Dikarya (subkingdom), Fungi (kingdom), Opisthokonta (no rank), Eukaryota (superkingdom), cellular organisms (no rank)
A0A1D2VK74_9ASCO	ASCRUDRAFT_75228	A0A1D2V9K8	3.9e-13	no	RACDICRKRKTKCFGGVPCNYCLNSKLECTFHAHQNKR	Fungal_trans domain-containing protein	Ascoidea rubescens DSM 1968	Non-Pathogen	Ascoidea rubescens (species), Ascoidea (genus), Ascoideaceae (family), CUG-Ser2 clade (no rank), Saccharomycetales (order), Saccharomycetes (class), Saccharomycotina (subphylum), saccharomyceta (no rank), Ascomycota (phylum), Dikarya (subkingdom), Fungi (kingdom), Opisthokonta (no rank), Eukaryota (superkingdom), cellular organisms (no rank)
A0A168B9T4_9EURO	AAP_01493	A0A0D8JVV9	1.5e-16	no	KSAFSCESCRKRKVKCNGVSPACSRCVARGEVCVYSlAPTLSYTK	Transcription factor	Ascosphaera apis ARSEF 7405	Pathogen	Ascosphaera apis (species), Ascosphaera (genus), Ascosphaeraceae (family), Onygenales (order), Eurotiomycetidae (subclass), Eurotiomycetes (class), leotiomyceta (no rank), Pezizomycotina (subphylum), saccharomyceta (no rank), Ascomycota (phylum), Dikarya (subkingdom), Fungi (kingdom), Opisthokonta (no rank), Eukaryota (superkingdom), cellular organisms (no rank)
A0A166NXJ0_9EURO	AAP_02516	A0A093Z7W6	7.5e-12	no	PRRSPRPCDTCRLRkTRCVVPIAGHQCTMCQERNTPCTFEQKPPKRSRA	Transcription factor	Ascosphaera apis ARSEF 7405	Pathogen	Ascosphaera apis (species), Ascosphaera (genus), Ascosphaeraceae (family), Onygenales (order), Eurotiomycetidae (subclass), Eurotiomycetes (class), leotiomyceta (no rank), Pezizomycotina (subphylum), saccharomyceta (no rank), Ascomycota (phylum), Dikarya (subkingdom), Fungi (kingdom), Opisthokonta (no rank), Eukaryota (superkingdom), cellular organisms (no rank)
A0A167X8S5_9EURO	AAP_04123	V5I439	8.3e-14	no	FRNVSACNRCRVRKNRCDQRLPRCHSCEKAKVHCVGYDATTKRE	Purine utilization positive regulator	Ascosphaera apis ARSEF 7405	Pathogen	Ascosphaera apis (species), Ascosphaera (genus), Ascosphaeraceae (family), Onygenales (order), Eurotiomycetidae (subclass), Eurotiomycetes (class), leotiomyceta (no rank), Pezizomycotina (subphylum), saccharomyceta (no rank), Ascomycota (phylum), Dikarya (subkingdom), Fungi (kingdom), Opisthokonta (no rank), Eukaryota (superkingdom), cellular organisms (no rank)
A0A162I6K5_9EURO	AAP_04440	A0A179UZ21	1.3e-14	no	CVSSACIACRKRKSKCDGNTPSCAACTSVYHTPcVYDPASDHRRKG	Nitrogen assimilation transcription factor nirA	Ascosphaera apis ARSEF 7405	Pathogen	Ascosphaera apis (species), Ascosphaera (genus), Ascosphaeraceae (family), Onygenales (order), Eurotiomycetidae (subclass), Eurotiomycetes (class), leotiomyceta (no rank), Pezizomycotina (subphylum), saccharomyceta (no rank), Ascomycota (phylum), Dikarya (subkingdom), Fungi (kingdom), Opisthokonta (no rank), Eukaryota (superkingdom), cellular organisms (no rank)
A0A162I4P6_9EURO	AAP_04896	V5FNC4	2e-14	no	QPVKRACNECRQQKVRCDVVQDPFSACSRCKRLNLQCKIEVNFKRIGK	C6 zinc finger domain protein	Ascosphaera apis ARSEF 7405	Pathogen	Ascosphaera apis (species), Ascosphaera (genus), Ascosphaeraceae (family), Onygenales (order), Eurotiomycetidae (subclass), Eurotiomycetes (class), leotiomyceta (no rank), Pezizomycotina (subphylum), saccharomyceta (no rank), Ascomycota (phylum), Dikarya (subkingdom), Fungi (kingdom), Opisthokonta (no rank), Eukaryota (superkingdom), cellular organisms (no rank)
A0A167V6P2_9EURO	AAP_05874	A0A1M3TAE7	1e-13	no	RTSKACQECrKRKIKCNGNSPCEMCGRRKTPCVYREITRQRRKK	Transcription factor	Ascosphaera apis ARSEF 7405	Pathogen	Ascosphaera apis (species), Ascosphaera (genus), Ascosphaeraceae (family), Onygenales (order), Eurotiomycetidae (subclass), Eurotiomycetes (class), leotiomyceta (no rank), Pezizomycotina (subphylum), saccharomyceta (no rank), Ascomycota (phylum), Dikarya (subkingdom), Fungi (kingdom), Opisthokonta (no rank), Eukaryota (superkingdom), cellular organisms (no rank)
A0A167UZX6_9EURO	AAP_06176	B6HSF1	1.4e-09	no	RESMNCKSCRKRKIKCSRTRPSCEACECIDCDCVRDTEP	Transcription factor	Ascosphaera apis ARSEF 7405	Pathogen	Ascosphaera apis (species), Ascosphaera (genus), Ascosphaeraceae (family), Onygenales (order), Eurotiomycetidae (subclass), Eurotiomycetes (class), leotiomyceta (no rank), Pezizomycotina (subphylum), saccharomyceta (no rank), Ascomycota (phylum), Dikarya (subkingdom), Fungi (kingdom), Opisthokonta (no rank), Eukaryota (superkingdom), cellular organisms (no rank)
A0A1L9X123_ASPA1	ASPACDRAFT_114819	A0A101MQ19	1.7e-16	no	ACSICRKKKVRCDGNRPVCASCKAFNLPCKYEDRVQRQKTH	Fungal_trans domain-containing protein	Aspergillus aculeatus (strain ATCC 16872 / CBS 172.66 / WB 5094)	Pathogen	Aspergillus aculeatus (species), Aspergillus subgen. Circumdati (subgenus), Aspergillus (genus), Aspergillaceae (family), Eurotiales (order), Eurotiomycetidae (subclass), Eurotiomycetes (class), leotiomyceta (no rank), Pezizomycotina (subphylum), saccharomyceta (no rank), Ascomycota (phylum), Dikarya (subkingdom), Fungi (kingdom), Opisthokonta (no rank), Eukaryota (superkingdom), cellular organis…
A0A1L9WYE5_ASPA1	ASPACDRAFT_115852	A0A146FJM6	4.7e-15	no	RRNRIACDSCHSRRVRCDRAFPCSRCLRSDIRCEFTRERRKRGR	Fungal_trans domain-containing protein	Aspergillus aculeatus (strain ATCC 16872 / CBS 172.66 / WB 5094)	Pathogen	Aspergillus aculeatus (species), Aspergillus subgen. Circumdati (subgenus), Aspergillus (genus), Aspergillaceae (family), Eurotiales (order), Eurotiomycetidae (subclass), Eurotiomycetes (class), leotiomyceta (no rank), Pezizomycotina (subphylum), saccharomyceta (no rank), Ascomycota (phylum), Dikarya (subkingdom), Fungi (kingdom), Opisthokonta (no rank), Eukaryota (superkingdom), cellular organis…
A0A1L9WN29_ASPA1	ASPACDRAFT_123472	X0HJF0	4.5e-11	no	NKSCIRCADSKLRCNLDQTGLPCSRCRHKGWHCERAERKKRA	Fungal_trans domain-containing protein	Aspergillus aculeatus (strain ATCC 16872 / CBS 172.66 / WB 5094)	Pathogen	Aspergillus aculeatus (species), Aspergillus subgen. Circumdati (subgenus), Aspergillus (genus), Aspergillaceae (family), Eurotiales (order), Eurotiomycetidae (subclass), Eurotiomycetes (class), leotiomyceta (no rank), Pezizomycotina (subphylum), saccharomyceta (no rank), Ascomycota (phylum), Dikarya (subkingdom), Fungi (kingdom), Opisthokonta (no rank), Eukaryota (superkingdom), cellular organis…
A0A1L9WNC6_ASPA1	ASPACDRAFT_123574	A0A1R3RBC8	1.6e-14	no	TTPVACLNCRDKHLKCDGNLAGCTRCQSLGLPCHFIPSRRGRKCR	Fungal_trans domain-containing protein	Aspergillus aculeatus (strain ATCC 16872 / CBS 172.66 / WB 5094)	Pathogen	Aspergillus aculeatus (species), Aspergillus subgen. Circumdati (subgenus), Aspergillus (genus), Aspergillaceae (family), Eurotiales (order), Eurotiomycetidae (subclass), Eurotiomycetes (class), leotiomyceta (no rank), Pezizomycotina (subphylum), saccharomyceta (no rank), Ascomycota (phylum), Dikarya (subkingdom), Fungi (kingdom), Opisthokonta (no rank), Eukaryota (superkingdom), cellular organis…
A0A1L9WJU8_ASPA1	ASPACDRAFT_125030	I8AAG7	1.6e-13	no	TQCDSCHARKVRCNRGLPCSNCLDQGLSCQRQRIRRRLPKR	Fungal_trans domain-containing protein	Aspergillus aculeatus (strain ATCC 16872 / CBS 172.66 / WB 5094)	Pathogen	Aspergillus aculeatus (species), Aspergillus subgen. Circumdati (subgenus), Aspergillus (genus), Aspergillaceae (family), Eurotiales (order), Eurotiomycetidae (subclass), Eurotiomycetes (class), leotiomyceta (no rank), Pezizomycotina (subphylum), saccharomyceta (no rank), Ascomycota (phylum), Dikarya (subkingdom), Fungi (kingdom), Opisthokonta (no rank), Eukaryota (superkingdom), cellular organis…
A0A1L9X078_ASPA1	ASPACDRAFT_1853955	A0A1L9TFA8	2e-14	no	RNRAACRRCQRRKIRCDGITPTCGACRKSGVACVNDGKQEVHRS	Fungal_trans domain-containing protein	Aspergillus aculeatus (strain ATCC 16872 / CBS 172.66 / WB 5094)	Pathogen	Aspergillus aculeatus (species), Aspergillus subgen. Circumdati (subgenus), Aspergillus (genus), Aspergillaceae (family), Eurotiales (order), Eurotiomycetidae (subclass), Eurotiomycetes (class), leotiomyceta (no rank), Pezizomycotina (subphylum), saccharomyceta (no rank), Ascomycota (phylum), Dikarya (subkingdom), Fungi (kingdom), Opisthokonta (no rank), Eukaryota (superkingdom), cellular organis…
A0A1L9WYZ2_ASPA1	ASPACDRAFT_1854771	A0A1R3RY58	2.9e-12	no	CDLCHSRKVKCDRLDPCMNCVDAEAECRRARPR	Fungal_trans domain-containing protein	Aspergillus aculeatus (strain ATCC 16872 / CBS 172.66 / WB 5094)	Pathogen	Aspergillus aculeatus (species), Aspergillus subgen. Circumdati (subgenus), Aspergillus (genus), Aspergillaceae (family), Eurotiales (order), Eurotiomycetidae (subclass), Eurotiomycetes (class), leotiomyceta (no rank), Pezizomycotina (subphylum), saccharomyceta (no rank), Ascomycota (phylum), Dikarya (subkingdom), Fungi (kingdom), Opisthokonta (no rank), Eukaryota (superkingdom), cellular organis…
A0A1L9WW67_ASPA1	ASPACDRAFT_1855993	A0A1L9MVP3	6.4e-16	no	SRVSLACETCRRRKRKCDGLRPACSLCIAKRAVCQYNTEKRRGRR	MFS domain-containing protein	Aspergillus aculeatus (strain ATCC 16872 / CBS 172.66 / WB 5094)	Pathogen	Aspergillus aculeatus (species), Aspergillus subgen. Circumdati (subgenus), Aspergillus (genus), Aspergillaceae (family), Eurotiales (order), Eurotiomycetidae (subclass), Eurotiomycetes (class), leotiomyceta (no rank), Pezizomycotina (subphylum), saccharomyceta (no rank), Ascomycota (phylum), Dikarya (subkingdom), Fungi (kingdom), Opisthokonta (no rank), Eukaryota (superkingdom), cellular organis…
A0A1L9WQI4_ASPA1	ASPACDRAFT_1857637	A0A1L9T7T8	8.9e-15	no	RTANaCVACRQSKIKCSGEEPCINCQRRSVRCEFAEGVNRVVVS	Fungal_trans domain-containing protein	Aspergillus aculeatus (strain ATCC 16872 / CBS 172.66 / WB 5094)	Pathogen	Aspergillus aculeatus (species), Aspergillus subgen. Circumdati (subgenus), Aspergillus (genus), Aspergillaceae (family), Eurotiales (order), Eurotiomycetidae (subclass), Eurotiomycetes (class), leotiomyceta (no rank), Pezizomycotina (subphylum), saccharomyceta (no rank), Ascomycota (phylum), Dikarya (subkingdom), Fungi (kingdom), Opisthokonta (no rank), Eukaryota (superkingdom), cellular organis…
A0A1L9X7X5_ASPA1	ASPACDRAFT_1861041	Q0CRY2	1e-14	no	QPRLSCQNCRQKKWRCDRKYPCNNCKLRKVHCQFNSGPDPQLPI	Fungal_trans domain-containing protein	Aspergillus aculeatus (strain ATCC 16872 / CBS 172.66 / WB 5094)	Pathogen	Aspergillus aculeatus (species), Aspergillus subgen. Circumdati (subgenus), Aspergillus (genus), Aspergillaceae (family), Eurotiales (order), Eurotiomycetidae (subclass), Eurotiomycetes (class), leotiomyceta (no rank), Pezizomycotina (subphylum), saccharomyceta (no rank), Ascomycota (phylum), Dikarya (subkingdom), Fungi (kingdom), Opisthokonta (no rank), Eukaryota (superkingdom), cellular organis…
A0A1L9WQ95_ASPA1	ASPACDRAFT_1889577	A0A017S7G2	1.5e-14	no	KHTPRACDSCYKRKIKCDAALPRCNYCSHHNFLCTFTRPKRRK	Fungal_trans domain-containing protein	Aspergillus aculeatus (strain ATCC 16872 / CBS 172.66 / WB 5094)	Pathogen	Aspergillus aculeatus (species), Aspergillus subgen. Circumdati (subgenus), Aspergillus (genus), Aspergillaceae (family), Eurotiales (order), Eurotiomycetidae (subclass), Eurotiomycetes (class), leotiomyceta (no rank), Pezizomycotina (subphylum), saccharomyceta (no rank), Ascomycota (phylum), Dikarya (subkingdom), Fungi (kingdom), Opisthokonta (no rank), Eukaryota (superkingdom), cellular organis…
A0A1L9WF20_ASPA1	ASPACDRAFT_1892172	W6QG11	5.5e-10	no	RALLACVKCKEKKWKCDNNPAGCNNCLRAESvCLVEDPVTRTFRP	Fungal_trans domain-containing protein	Aspergillus aculeatus (strain ATCC 16872 / CBS 172.66 / WB 5094)	Pathogen	Aspergillus aculeatus (species), Aspergillus subgen. Circumdati (subgenus), Aspergillus (genus), Aspergillaceae (family), Eurotiales (order), Eurotiomycetidae (subclass), Eurotiomycetes (class), leotiomyceta (no rank), Pezizomycotina (subphylum), saccharomyceta (no rank), Ascomycota (phylum), Dikarya (subkingdom), Fungi (kingdom), Opisthokonta (no rank), Eukaryota (superkingdom), cellular organis…
A0A1L9X0P8_ASPA1	ASPACDRAFT_1897108	A1C4L1	2.6e-16	no	RSRQACTQCRLRRVKCDGNVPCSMCASSSVDCEYVPNTRLAGAR	Fungal_trans domain-containing protein	Aspergillus aculeatus (strain ATCC 16872 / CBS 172.66 / WB 5094)	Pathogen	Aspergillus aculeatus (species), Aspergillus subgen. Circumdati (subgenus), Aspergillus (genus), Aspergillaceae (family), Eurotiales (order), Eurotiomycetidae (subclass), Eurotiomycetes (class), leotiomyceta (no rank), Pezizomycotina (subphylum), saccharomyceta (no rank), Ascomycota (phylum), Dikarya (subkingdom), Fungi (kingdom), Opisthokonta (no rank), Eukaryota (superkingdom), cellular organis…
A0A1L9WZ17_ASPA1	ASPACDRAFT_1898203	A0A1L9PB31	4.5e-13	no	SHPACDRCRGMKKRCDRSRPDCASCLHAGRKCSYEALQARLKE	Fungal_trans domain-containing protein	Aspergillus aculeatus (strain ATCC 16872 / CBS 172.66 / WB 5094)	Pathogen	Aspergillus aculeatus (species), Aspergillus subgen. Circumdati (subgenus), Aspergillus (genus), Aspergillaceae (family), Eurotiales (order), Eurotiomycetidae (subclass), Eurotiomycetes (class), leotiomyceta (no rank), Pezizomycotina (subphylum), saccharomyceta (no rank), Ascomycota (phylum), Dikarya (subkingdom), Fungi (kingdom), Opisthokonta (no rank), Eukaryota (superkingdom), cellular organis…
A0A1L9X3H4_ASPA1	ASPACDRAFT_23298	A0A1R3RNN1	2.5e-12	no	RNPLACETCYKRKIKCEVEGSNNACIQCMRRNIPCKFTTRKEKRESL	Fungal_trans domain-containing protein	Aspergillus aculeatus (strain ATCC 16872 / CBS 172.66 / WB 5094)	Pathogen	Aspergillus aculeatus (species), Aspergillus subgen. Circumdati (subgenus), Aspergillus (genus), Aspergillaceae (family), Eurotiales (order), Eurotiomycetidae (subclass), Eurotiomycetes (class), leotiomyceta (no rank), Pezizomycotina (subphylum), saccharomyceta (no rank), Ascomycota (phylum), Dikarya (subkingdom), Fungi (kingdom), Opisthokonta (no rank), Eukaryota (superkingdom), cellular organis…
A0A1L9WTS8_ASPA1	ASPACDRAFT_29118	A0A0F7VBX6	3.3e-12	no	PRLPACQSCYTKKIKCDNERPKCGPCSRAGNGCLTVSLDGSEPVS	Fungal_trans domain-containing protein	Aspergillus aculeatus (strain ATCC 16872 / CBS 172.66 / WB 5094)	Pathogen	Aspergillus aculeatus (species), Aspergillus subgen. Circumdati (subgenus), Aspergillus (genus), Aspergillaceae (family), Eurotiales (order), Eurotiomycetidae (subclass), Eurotiomycetes (class), leotiomyceta (no rank), Pezizomycotina (subphylum), saccharomyceta (no rank), Ascomycota (phylum), Dikarya (subkingdom), Fungi (kingdom), Opisthokonta (no rank), Eukaryota (superkingdom), cellular organis…
A0A1L9WII7_ASPA1	ASPACDRAFT_35535	A0A093VBY6	1.3e-11	no	RVAKSCDNCKARKIRCLrPPTSPSCTQCQKRNIRCNFSLTRRQLKPK	Fungal_trans domain-containing protein	Aspergillus aculeatus (strain ATCC 16872 / CBS 172.66 / WB 5094)	Pathogen	Aspergillus aculeatus (species), Aspergillus subgen. Circumdati (subgenus), Aspergillus (genus), Aspergillaceae (family), Eurotiales (order), Eurotiomycetidae (subclass), Eurotiomycetes (class), leotiomyceta (no rank), Pezizomycotina (subphylum), saccharomyceta (no rank), Ascomycota (phylum), Dikarya (subkingdom), Fungi (kingdom), Opisthokonta (no rank), Eukaryota (superkingdom), cellular organis…
A0A1L9WEW8_ASPA1	ASPACDRAFT_37366	A0A1L9T2D9	1.4e-12	no	RSTVACHSCRQRKVRCSINVTGVPCIRCAQDHAECVVDPPAEsARTS	Fungal_trans domain-containing protein	Aspergillus aculeatus (strain ATCC 16872 / CBS 172.66 / WB 5094)	Pathogen	Aspergillus aculeatus (species), Aspergillus subgen. Circumdati (subgenus), Aspergillus (genus), Aspergillaceae (family), Eurotiales (order), Eurotiomycetidae (subclass), Eurotiomycetes (class), leotiomyceta (no rank), Pezizomycotina (subphylum), saccharomyceta (no rank), Ascomycota (phylum), Dikarya (subkingdom), Fungi (kingdom), Opisthokonta (no rank), Eukaryota (superkingdom), cellular organis…
A0A1L9X7M0_ASPA1	ASPACDRAFT_37884	A0A094I0R6	3.4e-12	no	RANLACDQCHGHKLKCTPLSQGCVRCTrLAIRCTFTRLPKKRGRK	Fungal_trans domain-containing protein	Aspergillus aculeatus (strain ATCC 16872 / CBS 172.66 / WB 5094)	Pathogen	Aspergillus aculeatus (species), Aspergillus subgen. Circumdati (subgenus), Aspergillus (genus), Aspergillaceae (family), Eurotiales (order), Eurotiomycetidae (subclass), Eurotiomycetes (class), leotiomyceta (no rank), Pezizomycotina (subphylum), saccharomyceta (no rank), Ascomycota (phylum), Dikarya (subkingdom), Fungi (kingdom), Opisthokonta (no rank), Eukaryota (superkingdom), cellular organis…
A0A1L9X3C2_ASPA1	ASPACDRAFT_40293	A0A1L9TZ18	9.5e-13	no	YTCDLCHSKKIRCNRQRNCSNCVDVGVDCQRLRRGRTSRKR	Fungal_trans domain-containing protein	Aspergillus aculeatus (strain ATCC 16872 / CBS 172.66 / WB 5094)	Pathogen	Aspergillus aculeatus (species), Aspergillus subgen. Circumdati (subgenus), Aspergillus (genus), Aspergillaceae (family), Eurotiales (order), Eurotiomycetidae (subclass), Eurotiomycetes (class), leotiomyceta (no rank), Pezizomycotina (subphylum), saccharomyceta (no rank), Ascomycota (phylum), Dikarya (subkingdom), Fungi (kingdom), Opisthokonta (no rank), Eukaryota (superkingdom), cellular organis…
A0A1L9X1G7_ASPA1	ASPACDRAFT_40957	A0A0G4PWP4	2.2e-15	no	RPPLACIQCYQRKVKCGKEFPACSRCVGAGIAEECTYRGSAHQKEVM	Fungal_trans domain-containing protein	Aspergillus aculeatus (strain ATCC 16872 / CBS 172.66 / WB 5094)	Pathogen	Aspergillus aculeatus (species), Aspergillus subgen. Circumdati (subgenus), Aspergillus (genus), Aspergillaceae (family), Eurotiales (order), Eurotiomycetidae (subclass), Eurotiomycetes (class), leotiomyceta (no rank), Pezizomycotina (subphylum), saccharomyceta (no rank), Ascomycota (phylum), Dikarya (subkingdom), Fungi (kingdom), Opisthokonta (no rank), Eukaryota (superkingdom), cellular organis…
A0A1L9WZX3_ASPA1	ASPACDRAFT_42071	A0A0U1M0J1	2.2e-14	no	GRRQACEPCRKLKTRCDHVWPKCGRCSAKNLACVYLVAPMTKTFR	Fungal_trans domain-containing protein	Aspergillus aculeatus (strain ATCC 16872 / CBS 172.66 / WB 5094)	Pathogen	Aspergillus aculeatus (species), Aspergillus subgen. Circumdati (subgenus), Aspergillus (genus), Aspergillaceae (family), Eurotiales (order), Eurotiomycetidae (subclass), Eurotiomycetes (class), leotiomyceta (no rank), Pezizomycotina (subphylum), saccharomyceta (no rank), Ascomycota (phylum), Dikarya (subkingdom), Fungi (kingdom), Opisthokonta (no rank), Eukaryota (superkingdom), cellular organis…
A0A1L9WXF2_ASPA1	ASPACDRAFT_42303	D4AXZ3	2.9e-12	no	NACNKCATRKVKCDKKEPCGACHRTRAECIYTIVHRPRKRK	Fungal_trans domain-containing protein	Aspergillus aculeatus (strain ATCC 16872 / CBS 172.66 / WB 5094)	Pathogen	Aspergillus aculeatus (species), Aspergillus subgen. Circumdati (subgenus), Aspergillus (genus), Aspergillaceae (family), Eurotiales (order), Eurotiomycetidae (subclass), Eurotiomycetes (class), leotiomyceta (no rank), Pezizomycotina (subphylum), saccharomyceta (no rank), Ascomycota (phylum), Dikarya (subkingdom), Fungi (kingdom), Opisthokonta (no rank), Eukaryota (superkingdom), cellular organis…
A0A1L9WXR0_ASPA1	ASPACDRAFT_42449	A0A1R3RN69	1.3e-12	no	RLACDSCFRKKIKCYRDRIPCEWCLQQGLQCTFDRSHRFNQ	Fungal_trans domain-containing protein	Aspergillus aculeatus (strain ATCC 16872 / CBS 172.66 / WB 5094)	Pathogen	Aspergillus aculeatus (species), Aspergillus subgen. Circumdati (subgenus), Aspergillus (genus), Aspergillaceae (family), Eurotiales (order), Eurotiomycetidae (subclass), Eurotiomycetes (class), leotiomyceta (no rank), Pezizomycotina (subphylum), saccharomyceta (no rank), Ascomycota (phylum), Dikarya (subkingdom), Fungi (kingdom), Opisthokonta (no rank), Eukaryota (superkingdom), cellular organis…
A0A1L9WVH9_ASPA1	ASPACDRAFT_42749	A0A1L9RYJ3	6.4e-14	no	TRSAAACQRCRRRKQKCDGRLPTCGPCAAAGTSCVM	Fungal_trans domain-containing protein	Aspergillus aculeatus (strain ATCC 16872 / CBS 172.66 / WB 5094)	Pathogen	Aspergillus aculeatus (species), Aspergillus subgen. Circumdati (subgenus), Aspergillus (genus), Aspergillaceae (family), Eurotiales (order), Eurotiomycetidae (subclass), Eurotiomycetes (class), leotiomyceta (no rank), Pezizomycotina (subphylum), saccharomyceta (no rank), Ascomycota (phylum), Dikarya (subkingdom), Fungi (kingdom), Opisthokonta (no rank), Eukaryota (superkingdom), cellular organis…
A0A1L9WVA1_ASPA1	ASPACDRAFT_42751	A0A1J7JHL4	4.5e-11	no	KGTHSCREcRRRKIRCQFVTSSDSVCVTCSARGTPCVSRDLVDRSPSE	Fungal_trans domain-containing protein	Aspergillus aculeatus (strain ATCC 16872 / CBS 172.66 / WB 5094)	Pathogen	Aspergillus aculeatus (species), Aspergillus subgen. Circumdati (subgenus), Aspergillus (genus), Aspergillaceae (family), Eurotiales (order), Eurotiomycetidae (subclass), Eurotiomycetes (class), leotiomyceta (no rank), Pezizomycotina (subphylum), saccharomyceta (no rank), Ascomycota (phylum), Dikarya (subkingdom), Fungi (kingdom), Opisthokonta (no rank), Eukaryota (superkingdom), cellular organis…
A0A1L9WUA6_ASPA1	ASPACDRAFT_43461	A0A0F8V5R5	5.2e-14	no	LAQFACDFCRQKKLkCSRELPKCNTCKPWPGECIYSRDVnSLGSG	Fungal_trans domain-containing protein	Aspergillus aculeatus (strain ATCC 16872 / CBS 172.66 / WB 5094)	Pathogen	Aspergillus aculeatus (species), Aspergillus subgen. Circumdati (subgenus), Aspergillus (genus), Aspergillaceae (family), Eurotiales (order), Eurotiomycetidae (subclass), Eurotiomycetes (class), leotiomyceta (no rank), Pezizomycotina (subphylum), saccharomyceta (no rank), Ascomycota (phylum), Dikarya (subkingdom), Fungi (kingdom), Opisthokonta (no rank), Eukaryota (superkingdom), cellular organis…
A0A1L9WUG7_ASPA1	ASPACDRAFT_43493	A0A017S5G8	1.3e-15	no	PRRAACDSCFKKKIQCDAESPQCNWCLHHNLPCTYTRLPESSSLA	Fungal_trans domain-containing protein	Aspergillus aculeatus (strain ATCC 16872 / CBS 172.66 / WB 5094)	Pathogen	Aspergillus aculeatus (species), Aspergillus subgen. Circumdati (subgenus), Aspergillus (genus), Aspergillaceae (family), Eurotiales (order), Eurotiomycetidae (subclass), Eurotiomycetes (class), leotiomyceta (no rank), Pezizomycotina (subphylum), saccharomyceta (no rank), Ascomycota (phylum), Dikarya (subkingdom), Fungi (kingdom), Opisthokonta (no rank), Eukaryota (superkingdom), cellular organis…
A0A1L9WQX9_ASPA1	ASPACDRAFT_44223	A0A0F7TG67	4e-12	no	PRPKLSCVPCRRKKLKCNRIHPCDNCIKHRRAEMCHFVGPQGVS	Fungal_trans domain-containing protein	Aspergillus aculeatus (strain ATCC 16872 / CBS 172.66 / WB 5094)	Pathogen	Aspergillus aculeatus (species), Aspergillus subgen. Circumdati (subgenus), Aspergillus (genus), Aspergillaceae (family), Eurotiales (order), Eurotiomycetidae (subclass), Eurotiomycetes (class), leotiomyceta (no rank), Pezizomycotina (subphylum), saccharomyceta (no rank), Ascomycota (phylum), Dikarya (subkingdom), Fungi (kingdom), Opisthokonta (no rank), Eukaryota (superkingdom), cellular organis…
A0A1L9WNC5_ASPA1	ASPACDRAFT_45759	A0A1L9N2L6	2.6e-14	no	RVKTgCLTCRARKVKCDETHPLCNNCRNLDVECQWGQGSRRQGCE	Fungal_trans domain-containing protein	Aspergillus aculeatus (strain ATCC 16872 / CBS 172.66 / WB 5094)	Pathogen	Aspergillus aculeatus (species), Aspergillus subgen. Circumdati (subgenus), Aspergillus (genus), Aspergillaceae (family), Eurotiales (order), Eurotiomycetidae (subclass), Eurotiomycetes (class), leotiomyceta (no rank), Pezizomycotina (subphylum), saccharomyceta (no rank), Ascomycota (phylum), Dikarya (subkingdom), Fungi (kingdom), Opisthokonta (no rank), Eukaryota (superkingdom), cellular organis…
A0A1L9WJA1_ASPA1	ASPACDRAFT_47008	A0A017SC93	2e-13	no	RVSSACERCRLHKSRCDPYRPCSLCVRANVECRQRSAIQRRPRA	Fungal_trans domain-containing protein	Aspergillus aculeatus (strain ATCC 16872 / CBS 172.66 / WB 5094)	Pathogen	Aspergillus aculeatus (species), Aspergillus subgen. Circumdati (subgenus), Aspergillus (genus), Aspergillaceae (family), Eurotiales (order), Eurotiomycetidae (subclass), Eurotiomycetes (class), leotiomyceta (no rank), Pezizomycotina (subphylum), saccharomyceta (no rank), Ascomycota (phylum), Dikarya (subkingdom), Fungi (kingdom), Opisthokonta (no rank), Eukaryota (superkingdom), cellular organis…
A0A1L9X7B2_ASPA1	ASPACDRAFT_48889	Q0C7L1	5.4e-14	no	PQKRYKITVACDECRVRKVRCDGIHPVCGPCVRKGNREKCIYTGDKKR	Fungal_trans domain-containing protein	Aspergillus aculeatus (strain ATCC 16872 / CBS 172.66 / WB 5094)	Pathogen	Aspergillus aculeatus (species), Aspergillus subgen. Circumdati (subgenus), Aspergillus (genus), Aspergillaceae (family), Eurotiales (order), Eurotiomycetidae (subclass), Eurotiomycetes (class), leotiomyceta (no rank), Pezizomycotina (subphylum), saccharomyceta (no rank), Ascomycota (phylum), Dikarya (subkingdom), Fungi (kingdom), Opisthokonta (no rank), Eukaryota (superkingdom), cellular organis…
A0A1L9X042_ASPA1	ASPACDRAFT_50699	A0A100I5U2	4.5e-14	no	KVSSACQRCRRQKLKCDVRRPCTLCLRAGAHCAPGATTRWRPYN	Fungal_trans domain-containing protein	Aspergillus aculeatus (strain ATCC 16872 / CBS 172.66 / WB 5094)	Pathogen	Aspergillus aculeatus (species), Aspergillus subgen. Circumdati (subgenus), Aspergillus (genus), Aspergillaceae (family), Eurotiales (order), Eurotiomycetidae (subclass), Eurotiomycetes (class), leotiomyceta (no rank), Pezizomycotina (subphylum), saccharomyceta (no rank), Ascomycota (phylum), Dikarya (subkingdom), Fungi (kingdom), Opisthokonta (no rank), Eukaryota (superkingdom), cellular organis…
A0A1L9X239_ASPA1	ASPACDRAFT_51088	A0A1R3RTD4	1.8e-13	no	YISIAcNECKRRKIKCNGQVPCQRCGHLNLEcRYAPNCCNNNFKDSeEF	Fungal_trans domain-containing protein	Aspergillus aculeatus (strain ATCC 16872 / CBS 172.66 / WB 5094)	Pathogen	Aspergillus aculeatus (species), Aspergillus subgen. Circumdati (subgenus), Aspergillus (genus), Aspergillaceae (family), Eurotiales (order), Eurotiomycetidae (subclass), Eurotiomycetes (class), leotiomyceta (no rank), Pezizomycotina (subphylum), saccharomyceta (no rank), Ascomycota (phylum), Dikarya (subkingdom), Fungi (kingdom), Opisthokonta (no rank), Eukaryota (superkingdom), cellular organis…
A0A1L9WWH4_ASPA1	ASPACDRAFT_52045	A0A1L9UQC4	4.4e-09	no	RLATSCTECQRRKQKCSRDWPCNHCQARRVAHLCKFPPKKALKVPD	Fungal_trans domain-containing protein	Aspergillus aculeatus (strain ATCC 16872 / CBS 172.66 / WB 5094)	Pathogen	Aspergillus aculeatus (species), Aspergillus subgen. Circumdati (subgenus), Aspergillus (genus), Aspergillaceae (family), Eurotiales (order), Eurotiomycetidae (subclass), Eurotiomycetes (class), leotiomyceta (no rank), Pezizomycotina (subphylum), saccharomyceta (no rank), Ascomycota (phylum), Dikarya (subkingdom), Fungi (kingdom), Opisthokonta (no rank), Eukaryota (superkingdom), cellular organis…
A0A1L9WR22_ASPA1	ASPACDRAFT_52886	A0A1L9UF89	4.9e-10	no	HKACDACRTRKTRCsLSGTNSTCDLCLSQRRPCSFTP	Fungal_trans domain-containing protein	Aspergillus aculeatus (strain ATCC 16872 / CBS 172.66 / WB 5094)	Pathogen	Aspergillus aculeatus (species), Aspergillus subgen. Circumdati (subgenus), Aspergillus (genus), Aspergillaceae (family), Eurotiales (order), Eurotiomycetidae (subclass), Eurotiomycetes (class), leotiomyceta (no rank), Pezizomycotina (subphylum), saccharomyceta (no rank), Ascomycota (phylum), Dikarya (subkingdom), Fungi (kingdom), Opisthokonta (no rank), Eukaryota (superkingdom), cellular organis…
A0A1L9WND8_ASPA1	ASPACDRAFT_62661	A0A1R3R867	2.5e-12	no	TRTAQACLGCRQAKTRCGGGKPCNRCRAQPQPCIYHRPQQLQQ	Fungal_trans domain-containing protein	Aspergillus aculeatus (strain ATCC 16872 / CBS 172.66 / WB 5094)	Pathogen	Aspergillus aculeatus (species), Aspergillus subgen. Circumdati (subgenus), Aspergillus (genus), Aspergillaceae (family), Eurotiales (order), Eurotiomycetidae (subclass), Eurotiomycetes (class), leotiomyceta (no rank), Pezizomycotina (subphylum), saccharomyceta (no rank), Ascomycota (phylum), Dikarya (subkingdom), Fungi (kingdom), Opisthokonta (no rank), Eukaryota (superkingdom), cellular organis…
A0A1L9WJI5_ASPA1	ASPACDRAFT_63759	A0A1R3RSZ4	7.2e-15	no	RIERACESCRSKKVKCNGENPCLRCWQHRLPCKYREKPRVRGR	Fungal_trans domain-containing protein	Aspergillus aculeatus (strain ATCC 16872 / CBS 172.66 / WB 5094)	Pathogen	Aspergillus aculeatus (species), Aspergillus subgen. Circumdati (subgenus), Aspergillus (genus), Aspergillaceae (family), Eurotiales (order), Eurotiomycetidae (subclass), Eurotiomycetes (class), leotiomyceta (no rank), Pezizomycotina (subphylum), saccharomyceta (no rank), Ascomycota (phylum), Dikarya (subkingdom), Fungi (kingdom), Opisthokonta (no rank), Eukaryota (superkingdom), cellular organis…
A0A1L9WHX6_ASPA1	ASPACDRAFT_64233	A2QW34	2.9e-11	no	RSTTACARCQKRRIGCDAVVPVCGGCQRARVDCIEGGMyVEELET	Fungal_trans domain-containing protein	Aspergillus aculeatus (strain ATCC 16872 / CBS 172.66 / WB 5094)	Pathogen	Aspergillus aculeatus (species), Aspergillus subgen. Circumdati (subgenus), Aspergillus (genus), Aspergillaceae (family), Eurotiales (order), Eurotiomycetidae (subclass), Eurotiomycetes (class), leotiomyceta (no rank), Pezizomycotina (subphylum), saccharomyceta (no rank), Ascomycota (phylum), Dikarya (subkingdom), Fungi (kingdom), Opisthokonta (no rank), Eukaryota (superkingdom), cellular organis…
A0A1L9WEV5_ASPA1	ASPACDRAFT_65076	A0A0A2JVC0	2.6e-14	no	RVTKACDQCRRWKIKCDGLSPCTHCRVYEQsCTYVTPSRRPKS	Fungal_trans domain-containing protein	Aspergillus aculeatus (strain ATCC 16872 / CBS 172.66 / WB 5094)	Pathogen	Aspergillus aculeatus (species), Aspergillus subgen. Circumdati (subgenus), Aspergillus (genus), Aspergillaceae (family), Eurotiales (order), Eurotiomycetidae (subclass), Eurotiomycetes (class), leotiomyceta (no rank), Pezizomycotina (subphylum), saccharomyceta (no rank), Ascomycota (phylum), Dikarya (subkingdom), Fungi (kingdom), Opisthokonta (no rank), Eukaryota (superkingdom), cellular organis…
A0A1L9X574_ASPA1	ASPACDRAFT_75051	A0A094A165	3.1e-13	no	KRVTHACDYCRKTRVRCSSQTPCMSCRLYESRCTYS	Fungal_trans domain-containing protein	Aspergillus aculeatus (strain ATCC 16872 / CBS 172.66 / WB 5094)	Pathogen	Aspergillus aculeatus (species), Aspergillus subgen. Circumdati (subgenus), Aspergillus (genus), Aspergillaceae (family), Eurotiales (order), Eurotiomycetidae (subclass), Eurotiomycetes (class), leotiomyceta (no rank), Pezizomycotina (subphylum), saccharomyceta (no rank), Ascomycota (phylum), Dikarya (subkingdom), Fungi (kingdom), Opisthokonta (no rank), Eukaryota (superkingdom), cellular organis…
A0A1L9WQU7_ASPA1	ASPACDRAFT_79868	A0A117DW21	9.1e-13	no	PVKVACLAcRTLRIRCDGLERCGNCVARETPCSYVPSKRGGPR	Fungal_trans domain-containing protein	Aspergillus aculeatus (strain ATCC 16872 / CBS 172.66 / WB 5094)	Pathogen	Aspergillus aculeatus (species), Aspergillus subgen. Circumdati (subgenus), Aspergillus (genus), Aspergillaceae (family), Eurotiales (order), Eurotiomycetidae (subclass), Eurotiomycetes (class), leotiomyceta (no rank), Pezizomycotina (subphylum), saccharomyceta (no rank), Ascomycota (phylum), Dikarya (subkingdom), Fungi (kingdom), Opisthokonta (no rank), Eukaryota (superkingdom), cellular organis…
A0A1L9WNV9_ASPA1	ASPACDRAFT_79992	A0A1L9USN3	4.1e-15	no	HTLTACTRCRQRKSRCDPGIPRCAPCERSNAKCVYYDSARKCTIS	Fungal_trans domain-containing protein	Aspergillus aculeatus (strain ATCC 16872 / CBS 172.66 / WB 5094)	Pathogen	Aspergillus aculeatus (species), Aspergillus subgen. Circumdati (subgenus), Aspergillus (genus), Aspergillaceae (family), Eurotiales (order), Eurotiomycetidae (subclass), Eurotiomycetes (class), leotiomyceta (no rank), Pezizomycotina (subphylum), saccharomyceta (no rank), Ascomycota (phylum), Dikarya (subkingdom), Fungi (kingdom), Opisthokonta (no rank), Eukaryota (superkingdom), cellular organis…
A0A1L9WQ24_ASPA1	ASPACDRAFT_80294	A2QBE0	5.9e-12	no	RKVTRACDACKAKKKACTGNIPCGPCTRKHLECTYQTAYNRGVA	Fungal_trans domain-containing protein	Aspergillus aculeatus (strain ATCC 16872 / CBS 172.66 / WB 5094)	Pathogen	Aspergillus aculeatus (species), Aspergillus subgen. Circumdati (subgenus), Aspergillus (genus), Aspergillaceae (family), Eurotiales (order), Eurotiomycetidae (subclass), Eurotiomycetes (class), leotiomyceta (no rank), Pezizomycotina (subphylum), saccharomyceta (no rank), Ascomycota (phylum), Dikarya (subkingdom), Fungi (kingdom), Opisthokonta (no rank), Eukaryota (superkingdom), cellular organis…
A0A1L9V2N1_ASPBC	ASPBRDRAFT_112450	A0A0G4NVU9	1.7e-14	no	RRLNaCIACRDRKVRCSGTQPCTTCVRRSTTCTFGPDDRKVTVS	Fungal_trans domain-containing protein	Aspergillus brasiliensis (strain CBS 101740 / IMI 381727 / IBT 21946)	Pathogen	Aspergillus brasiliensis (species), Aspergillus (genus), Aspergillaceae (family), Eurotiales (order), Eurotiomycetidae (subclass), Eurotiomycetes (class), leotiomyceta (no rank), Pezizomycotina (subphylum), saccharomyceta (no rank), Ascomycota (phylum), Dikarya (subkingdom), Fungi (kingdom), Opisthokonta (no rank), Eukaryota (superkingdom), cellular organisms (no rank)
A0A1L9UV24_ASPBC	ASPBRDRAFT_116224	A0A0L1IX15	8.1e-12	no	NGKPCSCEPCRISKIRCDHKTPVCDRCVARQKERSCVYHPAPMTKPR	Fungal_trans domain-containing protein	Aspergillus brasiliensis (strain CBS 101740 / IMI 381727 / IBT 21946)	Pathogen	Aspergillus brasiliensis (species), Aspergillus (genus), Aspergillaceae (family), Eurotiales (order), Eurotiomycetidae (subclass), Eurotiomycetes (class), leotiomyceta (no rank), Pezizomycotina (subphylum), saccharomyceta (no rank), Ascomycota (phylum), Dikarya (subkingdom), Fungi (kingdom), Opisthokonta (no rank), Eukaryota (superkingdom), cellular organisms (no rank)
A0A1L9UHL7_ASPBC	ASPBRDRAFT_126804	A0A0L1JEG2	3.8e-14	no	KPKATACDSCYRKKIKCEAEYPQCNYCMHRNIACTYSRM	Fungal_trans domain-containing protein	Aspergillus brasiliensis (strain CBS 101740 / IMI 381727 / IBT 21946)	Pathogen	Aspergillus brasiliensis (species), Aspergillus (genus), Aspergillaceae (family), Eurotiales (order), Eurotiomycetidae (subclass), Eurotiomycetes (class), leotiomyceta (no rank), Pezizomycotina (subphylum), saccharomyceta (no rank), Ascomycota (phylum), Dikarya (subkingdom), Fungi (kingdom), Opisthokonta (no rank), Eukaryota (superkingdom), cellular organisms (no rank)
A0A1L9UDR3_ASPBC	ASPBRDRAFT_130059	A0A100IU48	5.6e-16	no	HVTTACIPCRDGKVKCGGGTPTCRNCAIRGKTCRYRQSDDKRKVP	Fungal_trans domain-containing protein	Aspergillus brasiliensis (strain CBS 101740 / IMI 381727 / IBT 21946)	Pathogen	Aspergillus brasiliensis (species), Aspergillus (genus), Aspergillaceae (family), Eurotiales (order), Eurotiomycetidae (subclass), Eurotiomycetes (class), leotiomyceta (no rank), Pezizomycotina (subphylum), saccharomyceta (no rank), Ascomycota (phylum), Dikarya (subkingdom), Fungi (kingdom), Opisthokonta (no rank), Eukaryota (superkingdom), cellular organisms (no rank)
A0A1L9U8Y8_ASPBC	ASPBRDRAFT_134274	A0A124BYL8	2.9e-14	no	RKVRRACEFCRQHRVRCDGGLPCSQCLANKIQCSKPIQQLRSP	Fungal_trans domain-containing protein	Aspergillus brasiliensis (strain CBS 101740 / IMI 381727 / IBT 21946)	Pathogen	Aspergillus brasiliensis (species), Aspergillus (genus), Aspergillaceae (family), Eurotiales (order), Eurotiomycetidae (subclass), Eurotiomycetes (class), leotiomyceta (no rank), Pezizomycotina (subphylum), saccharomyceta (no rank), Ascomycota (phylum), Dikarya (subkingdom), Fungi (kingdom), Opisthokonta (no rank), Eukaryota (superkingdom), cellular organisms (no rank)
A0A1L9U7L6_ASPBC	ASPBRDRAFT_134974	A2QYX8	7.3e-12	no	RRRGACEPCKARKTRcDGGNPCMHCRRTSQRKGSPCTYPKGPASASSI	MFS domain-containing protein	Aspergillus brasiliensis (strain CBS 101740 / IMI 381727 / IBT 21946)	Pathogen	Aspergillus brasiliensis (species), Aspergillus (genus), Aspergillaceae (family), Eurotiales (order), Eurotiomycetidae (subclass), Eurotiomycetes (class), leotiomyceta (no rank), Pezizomycotina (subphylum), saccharomyceta (no rank), Ascomycota (phylum), Dikarya (subkingdom), Fungi (kingdom), Opisthokonta (no rank), Eukaryota (superkingdom), cellular organisms (no rank)
A0A1L9U6X7_ASPBC	ASPBRDRAFT_136082	A0A0L1J3L5	5.8e-14	no	RGRTACTRCKTRKQKCDNDYPVCSNCQKAGAICDKATVRQESGAQ	MFS domain-containing protein	Aspergillus brasiliensis (strain CBS 101740 / IMI 381727 / IBT 21946)	Pathogen	Aspergillus brasiliensis (species), Aspergillus (genus), Aspergillaceae (family), Eurotiales (order), Eurotiomycetidae (subclass), Eurotiomycetes (class), leotiomyceta (no rank), Pezizomycotina (subphylum), saccharomyceta (no rank), Ascomycota (phylum), Dikarya (subkingdom), Fungi (kingdom), Opisthokonta (no rank), Eukaryota (superkingdom), cellular organisms (no rank)
A0A1L9U669_ASPBC	ASPBRDRAFT_136276	W9I8W3	4.3e-16	no	KISQACSHCRKKKVKcDGAVPCGNCLDRGQQCGYPVLQRRGRKS	Fungal_trans domain-containing protein	Aspergillus brasiliensis (strain CBS 101740 / IMI 381727 / IBT 21946)	Pathogen	Aspergillus brasiliensis (species), Aspergillus (genus), Aspergillaceae (family), Eurotiales (order), Eurotiomycetidae (subclass), Eurotiomycetes (class), leotiomyceta (no rank), Pezizomycotina (subphylum), saccharomyceta (no rank), Ascomycota (phylum), Dikarya (subkingdom), Fungi (kingdom), Opisthokonta (no rank), Eukaryota (superkingdom), cellular organisms (no rank)
A0A1L9U2L5_ASPBC	ASPBRDRAFT_139167	A0A1L9PNG2	3.3e-12	no	RLSISCDSCrQSKVKCIHDGHPPCRRCHRLRRDDCVLTDPRSPRTPR	Fungal_trans domain-containing protein	Aspergillus brasiliensis (strain CBS 101740 / IMI 381727 / IBT 21946)	Pathogen	Aspergillus brasiliensis (species), Aspergillus (genus), Aspergillaceae (family), Eurotiales (order), Eurotiomycetidae (subclass), Eurotiomycetes (class), leotiomyceta (no rank), Pezizomycotina (subphylum), saccharomyceta (no rank), Ascomycota (phylum), Dikarya (subkingdom), Fungi (kingdom), Opisthokonta (no rank), Eukaryota (superkingdom), cellular organisms (no rank)
A0A1L9U302_ASPBC	ASPBRDRAFT_164551	A2QM31	1.5e-07	no	IPKSCKRCHRRKQRCVGYPTCTGCESAKQPCL	Fungal_trans domain-containing protein	Aspergillus brasiliensis (strain CBS 101740 / IMI 381727 / IBT 21946)	Pathogen	Aspergillus brasiliensis (species), Aspergillus (genus), Aspergillaceae (family), Eurotiales (order), Eurotiomycetidae (subclass), Eurotiomycetes (class), leotiomyceta (no rank), Pezizomycotina (subphylum), saccharomyceta (no rank), Ascomycota (phylum), Dikarya (subkingdom), Fungi (kingdom), Opisthokonta (no rank), Eukaryota (superkingdom), cellular organisms (no rank)
A0A1L9ULZ6_ASPBC	ASPBRDRAFT_176089	A0A1L9RM70	4.3e-14	no	RISKACQQCRMRKIRCDGLTPCAKCSERHLRCEYRDKARQRRKK	Fungal_trans domain-containing protein	Aspergillus brasiliensis (strain CBS 101740 / IMI 381727 / IBT 21946)	Pathogen	Aspergillus brasiliensis (species), Aspergillus (genus), Aspergillaceae (family), Eurotiales (order), Eurotiomycetidae (subclass), Eurotiomycetes (class), leotiomyceta (no rank), Pezizomycotina (subphylum), saccharomyceta (no rank), Ascomycota (phylum), Dikarya (subkingdom), Fungi (kingdom), Opisthokonta (no rank), Eukaryota (superkingdom), cellular organisms (no rank)
A0A1L9UBS2_ASPBC	ASPBRDRAFT_183496	A2R4Y9	5.1e-16	no	RKRRRPAFSCAACRRRKVRCDRVNPCGQCVTLNIAAECTYEQNRHT	Fungal_trans domain-containing protein	Aspergillus brasiliensis (strain CBS 101740 / IMI 381727 / IBT 21946)	Pathogen	Aspergillus brasiliensis (species), Aspergillus (genus), Aspergillaceae (family), Eurotiales (order), Eurotiomycetidae (subclass), Eurotiomycetes (class), leotiomyceta (no rank), Pezizomycotina (subphylum), saccharomyceta (no rank), Ascomycota (phylum), Dikarya (subkingdom), Fungi (kingdom), Opisthokonta (no rank), Eukaryota (superkingdom), cellular organisms (no rank)
A0A1L9U2U5_ASPBC	ASPBRDRAFT_189494	A0A100ITM8	1.1e-12	no	LRRRVCDLCHARKVRCDKEDPCGNCQDQVTACTRTRGMKRLPKR	Fungal_trans domain-containing protein	Aspergillus brasiliensis (strain CBS 101740 / IMI 381727 / IBT 21946)	Pathogen	Aspergillus brasiliensis (species), Aspergillus (genus), Aspergillaceae (family), Eurotiales (order), Eurotiomycetidae (subclass), Eurotiomycetes (class), leotiomyceta (no rank), Pezizomycotina (subphylum), saccharomyceta (no rank), Ascomycota (phylum), Dikarya (subkingdom), Fungi (kingdom), Opisthokonta (no rank), Eukaryota (superkingdom), cellular organisms (no rank)
A0A1L9UYU1_ASPBC	ASPBRDRAFT_190184	A0A1L9NKX7	3.4e-14	no	RASRACETCHARKVRCDAASLGVPCTNCVAFSIECKIPTPKRKKNQT	Fungal_trans domain-containing protein	Aspergillus brasiliensis (strain CBS 101740 / IMI 381727 / IBT 21946)	Pathogen	Aspergillus brasiliensis (species), Aspergillus (genus), Aspergillaceae (family), Eurotiales (order), Eurotiomycetidae (subclass), Eurotiomycetes (class), leotiomyceta (no rank), Pezizomycotina (subphylum), saccharomyceta (no rank), Ascomycota (phylum), Dikarya (subkingdom), Fungi (kingdom), Opisthokonta (no rank), Eukaryota (superkingdom), cellular organisms (no rank)
A0A1L9V1T1_ASPBC	ASPBRDRAFT_191178	A0A1L9VFE7	1.1e-13	no	AKHACRECRRRKSKCDRLVPSCSLCGKFNRRCLYETLSKTPLTR	Fungal_trans domain-containing protein	Aspergillus brasiliensis (strain CBS 101740 / IMI 381727 / IBT 21946)	Pathogen	Aspergillus brasiliensis (species), Aspergillus (genus), Aspergillaceae (family), Eurotiales (order), Eurotiomycetidae (subclass), Eurotiomycetes (class), leotiomyceta (no rank), Pezizomycotina (subphylum), saccharomyceta (no rank), Ascomycota (phylum), Dikarya (subkingdom), Fungi (kingdom), Opisthokonta (no rank), Eukaryota (superkingdom), cellular organisms (no rank)
A0A1L9UNW1_ASPBC	ASPBRDRAFT_205676	A0A1M3TP23	6.3e-14	no	KIALACSPCRARKIRCDGIEPTCGPCRRRETSCSYPVENSRKLQE	Fungal_trans domain-containing protein	Aspergillus brasiliensis (strain CBS 101740 / IMI 381727 / IBT 21946)	Pathogen	Aspergillus brasiliensis (species), Aspergillus (genus), Aspergillaceae (family), Eurotiales (order), Eurotiomycetidae (subclass), Eurotiomycetes (class), leotiomyceta (no rank), Pezizomycotina (subphylum), saccharomyceta (no rank), Ascomycota (phylum), Dikarya (subkingdom), Fungi (kingdom), Opisthokonta (no rank), Eukaryota (superkingdom), cellular organisms (no rank)
A0A1L9U979_ASPBC	ASPBRDRAFT_321459	A0A2J6R4T0	1.7e-14	no	PSACSNCRSKKIRcSRTLPCANCSDFGKECNYPSPNRREKSS	Fungal_trans domain-containing protein	Aspergillus brasiliensis (strain CBS 101740 / IMI 381727 / IBT 21946)	Pathogen	Aspergillus brasiliensis (species), Aspergillus (genus), Aspergillaceae (family), Eurotiales (order), Eurotiomycetidae (subclass), Eurotiomycetes (class), leotiomyceta (no rank), Pezizomycotina (subphylum), saccharomyceta (no rank), Ascomycota (phylum), Dikarya (subkingdom), Fungi (kingdom), Opisthokonta (no rank), Eukaryota (superkingdom), cellular organisms (no rank)
A0A1L9U7Z7_ASPBC	ASPBRDRAFT_324883	A0A1M3TVJ6	1.7e-15	no	KTRLACNNCREHKTRCDGRTPACSRCANRGLGQSCIYEKGSLRTQRY	Fungal_trans domain-containing protein	Aspergillus brasiliensis (strain CBS 101740 / IMI 381727 / IBT 21946)	Pathogen	Aspergillus brasiliensis (species), Aspergillus (genus), Aspergillaceae (family), Eurotiales (order), Eurotiomycetidae (subclass), Eurotiomycetes (class), leotiomyceta (no rank), Pezizomycotina (subphylum), saccharomyceta (no rank), Ascomycota (phylum), Dikarya (subkingdom), Fungi (kingdom), Opisthokonta (no rank), Eukaryota (superkingdom), cellular organisms (no rank)
A0A1L9UPG6_ASPBC	ASPBRDRAFT_41070	A0A1R3S1L3	4.8e-13	no	PCINCRFQKARCSGETPQCNNCQRRHRECQYEKNNLAIERP	Fungal_trans domain-containing protein	Aspergillus brasiliensis (strain CBS 101740 / IMI 381727 / IBT 21946)	Pathogen	Aspergillus brasiliensis (species), Aspergillus (genus), Aspergillaceae (family), Eurotiales (order), Eurotiomycetidae (subclass), Eurotiomycetes (class), leotiomyceta (no rank), Pezizomycotina (subphylum), saccharomyceta (no rank), Ascomycota (phylum), Dikarya (subkingdom), Fungi (kingdom), Opisthokonta (no rank), Eukaryota (superkingdom), cellular organisms (no rank)
A0A1L9UH49_ASPBC	ASPBRDRAFT_43903	A0A100I5U2	8.8e-14	no	KVPSACQRCRRQKLKCDVQRPCLLCVRVGARCLPGPMTRWRPYQ	Fungal_trans domain-containing protein	Aspergillus brasiliensis (strain CBS 101740 / IMI 381727 / IBT 21946)	Pathogen	Aspergillus brasiliensis (species), Aspergillus (genus), Aspergillaceae (family), Eurotiales (order), Eurotiomycetidae (subclass), Eurotiomycetes (class), leotiomyceta (no rank), Pezizomycotina (subphylum), saccharomyceta (no rank), Ascomycota (phylum), Dikarya (subkingdom), Fungi (kingdom), Opisthokonta (no rank), Eukaryota (superkingdom), cellular organisms (no rank)
A0A1L9U7I4_ASPBC	ASPBRDRAFT_47673	A0A1L9V562	1.8e-13	no	ISCRRCQQKKIRCNRLDPRCDKCDAVGAECTYLPRKQRSAKR	Fungal_trans domain-containing protein	Aspergillus brasiliensis (strain CBS 101740 / IMI 381727 / IBT 21946)	Pathogen	Aspergillus brasiliensis (species), Aspergillus (genus), Aspergillaceae (family), Eurotiales (order), Eurotiomycetidae (subclass), Eurotiomycetes (class), leotiomyceta (no rank), Pezizomycotina (subphylum), saccharomyceta (no rank), Ascomycota (phylum), Dikarya (subkingdom), Fungi (kingdom), Opisthokonta (no rank), Eukaryota (superkingdom), cellular organisms (no rank)
A0A1L9U412_ASPBC	ASPBRDRAFT_49001	A0A093VBY6	2e-08	no	RVARSCDNCKARKTRCIrPPSSTICTPCQKRKVECHYSLTRRQLRPK	Fungal_trans domain-containing protein	Aspergillus brasiliensis (strain CBS 101740 / IMI 381727 / IBT 21946)	Pathogen	Aspergillus brasiliensis (species), Aspergillus (genus), Aspergillaceae (family), Eurotiales (order), Eurotiomycetidae (subclass), Eurotiomycetes (class), leotiomyceta (no rank), Pezizomycotina (subphylum), saccharomyceta (no rank), Ascomycota (phylum), Dikarya (subkingdom), Fungi (kingdom), Opisthokonta (no rank), Eukaryota (superkingdom), cellular organisms (no rank)
A0A1L9U4G4_ASPBC	ASPBRDRAFT_49083	A0A0J0CH40	1.8e-13	no	EGDLtCHSCRkRKVKcDRTLPRCRVCHQTGQTCNYPVQSMKPGPK	Fungal_trans domain-containing protein	Aspergillus brasiliensis (strain CBS 101740 / IMI 381727 / IBT 21946)	Pathogen	Aspergillus brasiliensis (species), Aspergillus (genus), Aspergillaceae (family), Eurotiales (order), Eurotiomycetidae (subclass), Eurotiomycetes (class), leotiomyceta (no rank), Pezizomycotina (subphylum), saccharomyceta (no rank), Ascomycota (phylum), Dikarya (subkingdom), Fungi (kingdom), Opisthokonta (no rank), Eukaryota (superkingdom), cellular organisms (no rank)
A0A1L9UNV9_ASPBC	ASPBRDRAFT_494120	A0A093YIC3	5.7e-06	no	AVRACQRCKGMKKRCSFSHDKTCCDRCTSDKVACSFQ	Fungal_trans domain-containing protein	Aspergillus brasiliensis (strain CBS 101740 / IMI 381727 / IBT 21946)	Pathogen	Aspergillus brasiliensis (species), Aspergillus (genus), Aspergillaceae (family), Eurotiales (order), Eurotiomycetidae (subclass), Eurotiomycetes (class), leotiomyceta (no rank), Pezizomycotina (subphylum), saccharomyceta (no rank), Ascomycota (phylum), Dikarya (subkingdom), Fungi (kingdom), Opisthokonta (no rank), Eukaryota (superkingdom), cellular organisms (no rank)
A0A1L9UN52_ASPBC	ASPBRDRAFT_54716	A0A117DY23	4.7e-12	no	RVQLSCTACRARkLKCCRTHPCTNCEKRNEASTCVFIGRGPRGKIS	Fungal_trans domain-containing protein	Aspergillus brasiliensis (strain CBS 101740 / IMI 381727 / IBT 21946)	Pathogen	Aspergillus brasiliensis (species), Aspergillus (genus), Aspergillaceae (family), Eurotiales (order), Eurotiomycetidae (subclass), Eurotiomycetes (class), leotiomyceta (no rank), Pezizomycotina (subphylum), saccharomyceta (no rank), Ascomycota (phylum), Dikarya (subkingdom), Fungi (kingdom), Opisthokonta (no rank), Eukaryota (superkingdom), cellular organisms (no rank)
A0A1L9U7B0_ASPBC	ASPBRDRAFT_58648	A0A1L9WLZ7	6.6e-12	no	PALLACRRCRIRKQKCSQPRPCTNCVQAQAaCVPSQRPARKSRV	CN hydrolase domain-containing protein	Aspergillus brasiliensis (strain CBS 101740 / IMI 381727 / IBT 21946)	Pathogen	Aspergillus brasiliensis (species), Aspergillus (genus), Aspergillaceae (family), Eurotiales (order), Eurotiomycetidae (subclass), Eurotiomycetes (class), leotiomyceta (no rank), Pezizomycotina (subphylum), saccharomyceta (no rank), Ascomycota (phylum), Dikarya (subkingdom), Fungi (kingdom), Opisthokonta (no rank), Eukaryota (superkingdom), cellular organisms (no rank)
A0A1L9U6J8_ASPBC	ASPBRDRAFT_58880	A0A0F8U1H9	5.3e-14	no	RECKTCLPCRASKVRCDRNVPCGNCVKRNFTCSYGRPPPTASRP	Fungal_trans domain-containing protein	Aspergillus brasiliensis (strain CBS 101740 / IMI 381727 / IBT 21946)	Pathogen	Aspergillus brasiliensis (species), Aspergillus (genus), Aspergillaceae (family), Eurotiales (order), Eurotiomycetidae (subclass), Eurotiomycetes (class), leotiomyceta (no rank), Pezizomycotina (subphylum), saccharomyceta (no rank), Ascomycota (phylum), Dikarya (subkingdom), Fungi (kingdom), Opisthokonta (no rank), Eukaryota (superkingdom), cellular organisms (no rank)
A0A1L9U4V6_ASPBC	ASPBRDRAFT_59496	A0A0F7U0I4	1.2e-14	no	PIPQLSCVSCRDRKVRCNKLDPCSNCTSSGVACMPIYRPRLPRGR	Fungal_trans domain-containing protein	Aspergillus brasiliensis (strain CBS 101740 / IMI 381727 / IBT 21946)	Pathogen	Aspergillus brasiliensis (species), Aspergillus (genus), Aspergillaceae (family), Eurotiales (order), Eurotiomycetidae (subclass), Eurotiomycetes (class), leotiomyceta (no rank), Pezizomycotina (subphylum), saccharomyceta (no rank), Ascomycota (phylum), Dikarya (subkingdom), Fungi (kingdom), Opisthokonta (no rank), Eukaryota (superkingdom), cellular organisms (no rank)
A0A1L9U480_ASPBC	ASPBRDRAFT_59600	A0A1L9S451	5.1e-12	no	PRLPACQSCYTKKAKCDNARPKCSPCMKNGQACLTVSLNSSEPVS	Fungal_trans domain-containing protein	Aspergillus brasiliensis (strain CBS 101740 / IMI 381727 / IBT 21946)	Pathogen	Aspergillus brasiliensis (species), Aspergillus (genus), Aspergillaceae (family), Eurotiales (order), Eurotiomycetidae (subclass), Eurotiomycetes (class), leotiomyceta (no rank), Pezizomycotina (subphylum), saccharomyceta (no rank), Ascomycota (phylum), Dikarya (subkingdom), Fungi (kingdom), Opisthokonta (no rank), Eukaryota (superkingdom), cellular organisms (no rank)
A0A1L9U3E8_ASPBC	ASPBRDRAFT_59881	A0A100ITG1	1.4e-13	no	ACDTCQRRKIRCDLGNKSKCSQCEKMGIACTRNLQRYQANL	Fungal_trans domain-containing protein	Aspergillus brasiliensis (strain CBS 101740 / IMI 381727 / IBT 21946)	Pathogen	Aspergillus brasiliensis (species), Aspergillus (genus), Aspergillaceae (family), Eurotiales (order), Eurotiomycetidae (subclass), Eurotiomycetes (class), leotiomyceta (no rank), Pezizomycotina (subphylum), saccharomyceta (no rank), Ascomycota (phylum), Dikarya (subkingdom), Fungi (kingdom), Opisthokonta (no rank), Eukaryota (superkingdom), cellular organisms (no rank)
A0A1L9UCB1_ASPBC	ASPBRDRAFT_657139	A2QUN1	1.7e-16	no	GPEYACNECRIRKVRCDRRTPVCSSCRKSGLVCQYTKGKRIDHTR	Fungal_trans domain-containing protein	Aspergillus brasiliensis (strain CBS 101740 / IMI 381727 / IBT 21946)	Pathogen	Aspergillus brasiliensis (species), Aspergillus (genus), Aspergillaceae (family), Eurotiales (order), Eurotiomycetidae (subclass), Eurotiomycetes (class), leotiomyceta (no rank), Pezizomycotina (subphylum), saccharomyceta (no rank), Ascomycota (phylum), Dikarya (subkingdom), Fungi (kingdom), Opisthokonta (no rank), Eukaryota (superkingdom), cellular organisms (no rank)
A0A1L9UB16_ASPBC	ASPBRDRAFT_67645	A2R5K1	5.3e-12	no	RKRRAVNCEACRRSKLRCDRQHPCGACKRRKREATCSYATPSGSSVS	Fungal_trans domain-containing protein	Aspergillus brasiliensis (strain CBS 101740 / IMI 381727 / IBT 21946)	Pathogen	Aspergillus brasiliensis (species), Aspergillus (genus), Aspergillaceae (family), Eurotiales (order), Eurotiomycetidae (subclass), Eurotiomycetes (class), leotiomyceta (no rank), Pezizomycotina (subphylum), saccharomyceta (no rank), Ascomycota (phylum), Dikarya (subkingdom), Fungi (kingdom), Opisthokonta (no rank), Eukaryota (superkingdom), cellular organisms (no rank)
A0A1L9U9P9_ASPBC	ASPBRDRAFT_67979	A0A1L9RT75	4.3e-14	no	ATCHTCKGCRQRKVKCDGKHPKCGACRLKNQDCEYPRDGRRTVVR	Fungal_trans domain-containing protein	Aspergillus brasiliensis (strain CBS 101740 / IMI 381727 / IBT 21946)	Pathogen	Aspergillus brasiliensis (species), Aspergillus (genus), Aspergillaceae (family), Eurotiales (order), Eurotiomycetidae (subclass), Eurotiomycetes (class), leotiomyceta (no rank), Pezizomycotina (subphylum), saccharomyceta (no rank), Ascomycota (phylum), Dikarya (subkingdom), Fungi (kingdom), Opisthokonta (no rank), Eukaryota (superkingdom), cellular organisms (no rank)
A0A1L9U6R2_ASPBC	ASPBRDRAFT_69021	A0A0K8L1S0	1.2e-15	no	RTPKACQECRRRKIKCNGDTPCTSCQERSWPCIYREKTRIRPSK	Fungal_trans domain-containing protein	Aspergillus brasiliensis (strain CBS 101740 / IMI 381727 / IBT 21946)	Pathogen	Aspergillus brasiliensis (species), Aspergillus (genus), Aspergillaceae (family), Eurotiales (order), Eurotiomycetidae (subclass), Eurotiomycetes (class), leotiomyceta (no rank), Pezizomycotina (subphylum), saccharomyceta (no rank), Ascomycota (phylum), Dikarya (subkingdom), Fungi (kingdom), Opisthokonta (no rank), Eukaryota (superkingdom), cellular organisms (no rank)
A0A1L9UNJ0_ASPBC	ASPBRDRAFT_73742	B8MQH5	7.5e-13	no	RSTIACETCRLRKVRCSLNITGVPCIGCAQDNTQCVVDPKREE	Fungal_trans domain-containing protein	Aspergillus brasiliensis (strain CBS 101740 / IMI 381727 / IBT 21946)	Pathogen	Aspergillus brasiliensis (species), Aspergillus (genus), Aspergillaceae (family), Eurotiales (order), Eurotiomycetidae (subclass), Eurotiomycetes (class), leotiomyceta (no rank), Pezizomycotina (subphylum), saccharomyceta (no rank), Ascomycota (phylum), Dikarya (subkingdom), Fungi (kingdom), Opisthokonta (no rank), Eukaryota (superkingdom), cellular organisms (no rank)
A0A1L9U474_ASPBC	ASPBRDRAFT_79090	A0A1L9T4W4	3.5e-10	no	RRVQACERCWKRKQKCDRLLPVCTACIEAKAKCCPRSVQLGTAED	MFS domain-containing protein	Aspergillus brasiliensis (strain CBS 101740 / IMI 381727 / IBT 21946)	Pathogen	Aspergillus brasiliensis (species), Aspergillus (genus), Aspergillaceae (family), Eurotiales (order), Eurotiomycetidae (subclass), Eurotiomycetes (class), leotiomyceta (no rank), Pezizomycotina (subphylum), saccharomyceta (no rank), Ascomycota (phylum), Dikarya (subkingdom), Fungi (kingdom), Opisthokonta (no rank), Eukaryota (superkingdom), cellular organisms (no rank)
A0A0U5FPC4_ASPCI	ASPCAL00045	A0A0A2JTJ1	4.1e-13	no	ARARASCSRCHRRKKRCDRTLPKCNTCHSAGVRCSFQDDEGQTAS	Fungal_trans domain-containing protein	Aspergillus calidoustus	Pathogen	Aspergillus subgen. Nidulantes (subgenus), Aspergillus (genus), Aspergillaceae (family), Eurotiales (order), Eurotiomycetidae (subclass), Eurotiomycetes (class), leotiomyceta (no rank), Pezizomycotina (subphylum), saccharomyceta (no rank), Ascomycota (phylum), Dikarya (subkingdom), Fungi (kingdom), Opisthokonta (no rank), Eukaryota (superkingdom), cellular organisms (no rank)
A0A0U5FUU7_ASPCI	ASPCAL00456	A0A0U5FRK6	8.2e-13	no	QLSKACQGCRARKIRCEKVVPCSNCQHLRIQCVPAETQYENRPR	Fungal_trans domain-containing protein	Aspergillus calidoustus	Pathogen	Aspergillus subgen. Nidulantes (subgenus), Aspergillus (genus), Aspergillaceae (family), Eurotiales (order), Eurotiomycetidae (subclass), Eurotiomycetes (class), leotiomyceta (no rank), Pezizomycotina (subphylum), saccharomyceta (no rank), Ascomycota (phylum), Dikarya (subkingdom), Fungi (kingdom), Opisthokonta (no rank), Eukaryota (superkingdom), cellular organisms (no rank)
A0A0U5FQW4_ASPCI	ASPCAL01349	A0A0F4YZV1	1.2e-11	no	RARIACLYCRRRKVRCDLVVEGHMCTNCRLDGLRCSPELK	Fungal_trans domain-containing protein	Aspergillus calidoustus	Pathogen	Aspergillus subgen. Nidulantes (subgenus), Aspergillus (genus), Aspergillaceae (family), Eurotiales (order), Eurotiomycetidae (subclass), Eurotiomycetes (class), leotiomyceta (no rank), Pezizomycotina (subphylum), saccharomyceta (no rank), Ascomycota (phylum), Dikarya (subkingdom), Fungi (kingdom), Opisthokonta (no rank), Eukaryota (superkingdom), cellular organisms (no rank)
A0A0U5HEF2_ASPCI	ASPCAL02104	A0A1L9TDS7	3.5e-15	no	AHTLAACTRCRQRKSRCDPGIPKCGPCDRSNANCSYYDSTRKRTI	Fungal_trans domain-containing protein	Aspergillus calidoustus	Pathogen	Aspergillus subgen. Nidulantes (subgenus), Aspergillus (genus), Aspergillaceae (family), Eurotiales (order), Eurotiomycetidae (subclass), Eurotiomycetes (class), leotiomyceta (no rank), Pezizomycotina (subphylum), saccharomyceta (no rank), Ascomycota (phylum), Dikarya (subkingdom), Fungi (kingdom), Opisthokonta (no rank), Eukaryota (superkingdom), cellular organisms (no rank)
A0A0U5GMH2_ASPCI	ASPCAL02353	A0A1L9U9P0	2.9e-10	no	IERAACDACYKKKIKCDRREQCENCLQGRIRCQRKRPTRQKRYS	Fungal_trans domain-containing protein	Aspergillus calidoustus	Pathogen	Aspergillus subgen. Nidulantes (subgenus), Aspergillus (genus), Aspergillaceae (family), Eurotiales (order), Eurotiomycetidae (subclass), Eurotiomycetes (class), leotiomyceta (no rank), Pezizomycotina (subphylum), saccharomyceta (no rank), Ascomycota (phylum), Dikarya (subkingdom), Fungi (kingdom), Opisthokonta (no rank), Eukaryota (superkingdom), cellular organisms (no rank)
A0A0U5GRA6_ASPCI	ASPCAL02799	M5A381	1.1e-10	no	NSNACARCHERKVKCNPgRRNPCKNCLASGETCrMEND	Fungal_trans domain-containing protein	Aspergillus calidoustus	Pathogen	Aspergillus subgen. Nidulantes (subgenus), Aspergillus (genus), Aspergillaceae (family), Eurotiales (order), Eurotiomycetidae (subclass), Eurotiomycetes (class), leotiomyceta (no rank), Pezizomycotina (subphylum), saccharomyceta (no rank), Ascomycota (phylum), Dikarya (subkingdom), Fungi (kingdom), Opisthokonta (no rank), Eukaryota (superkingdom), cellular organisms (no rank)
A0A0U5GNS3_ASPCI	ASPCAL02832	W9K371	1e-13	no	RRGQACLPCSKLKQRCDGGLPCARCSVRDSECSYPPRPSGRAAT	Fungal_trans domain-containing protein	Aspergillus calidoustus	Pathogen	Aspergillus subgen. Nidulantes (subgenus), Aspergillus (genus), Aspergillaceae (family), Eurotiales (order), Eurotiomycetidae (subclass), Eurotiomycetes (class), leotiomyceta (no rank), Pezizomycotina (subphylum), saccharomyceta (no rank), Ascomycota (phylum), Dikarya (subkingdom), Fungi (kingdom), Opisthokonta (no rank), Eukaryota (superkingdom), cellular organisms (no rank)
A0A0U5FUV0_ASPCI	ASPCAL03282	A1DDB1	1.7e-15	no	RRRACDSCSRKKVQCDAESPQCNWCEHHNLACTYNRIWGCT	Fungal_trans domain-containing protein	Aspergillus calidoustus	Pathogen	Aspergillus subgen. Nidulantes (subgenus), Aspergillus (genus), Aspergillaceae (family), Eurotiales (order), Eurotiomycetidae (subclass), Eurotiomycetes (class), leotiomyceta (no rank), Pezizomycotina (subphylum), saccharomyceta (no rank), Ascomycota (phylum), Dikarya (subkingdom), Fungi (kingdom), Opisthokonta (no rank), Eukaryota (superkingdom), cellular organisms (no rank)
A0A0U5FU93_ASPCI	ASPCAL03403	A0A1L9PZ32	1.3e-08	no	GCGYCLSNHIGCDLVEGSPCGTCRDYGIQCP	Fungal_trans domain-containing protein	Aspergillus calidoustus	Pathogen	Aspergillus subgen. Nidulantes (subgenus), Aspergillus (genus), Aspergillaceae (family), Eurotiales (order), Eurotiomycetidae (subclass), Eurotiomycetes (class), leotiomyceta (no rank), Pezizomycotina (subphylum), saccharomyceta (no rank), Ascomycota (phylum), Dikarya (subkingdom), Fungi (kingdom), Opisthokonta (no rank), Eukaryota (superkingdom), cellular organisms (no rank)
A0A0U5GP04_ASPCI	ASPCAL03685	A0A1L9PQL0	7.4e-13	no	RKSFACDECKRRKIRCSGDENCMNCMRDAKSCRYSSPSHQLSKL	Fungal_trans domain-containing protein	Aspergillus calidoustus	Pathogen	Aspergillus subgen. Nidulantes (subgenus), Aspergillus (genus), Aspergillaceae (family), Eurotiales (order), Eurotiomycetidae (subclass), Eurotiomycetes (class), leotiomyceta (no rank), Pezizomycotina (subphylum), saccharomyceta (no rank), Ascomycota (phylum), Dikarya (subkingdom), Fungi (kingdom), Opisthokonta (no rank), Eukaryota (superkingdom), cellular organisms (no rank)
A0A0U5FV72_ASPCI	ASPCAL04580	A0A162BY84	3.6e-12	no	YRACKECAVSRVRCPKGHPCERCQQRELQCVYPMARKRK	Fungal_trans domain-containing protein	Aspergillus calidoustus	Pathogen	Aspergillus subgen. Nidulantes (subgenus), Aspergillus (genus), Aspergillaceae (family), Eurotiales (order), Eurotiomycetidae (subclass), Eurotiomycetes (class), leotiomyceta (no rank), Pezizomycotina (subphylum), saccharomyceta (no rank), Ascomycota (phylum), Dikarya (subkingdom), Fungi (kingdom), Opisthokonta (no rank), Eukaryota (superkingdom), cellular organisms (no rank)
A0A0U5FWB9_ASPCI	ASPCAL04742	A0A0F7TXN0	3.4e-11	no	KRIERACTRCRVRKRKCRFSDQDICDNCRRAGHSCVVEPTTD	Fungal_trans domain-containing protein	Aspergillus calidoustus	Pathogen	Aspergillus subgen. Nidulantes (subgenus), Aspergillus (genus), Aspergillaceae (family), Eurotiales (order), Eurotiomycetidae (subclass), Eurotiomycetes (class), leotiomyceta (no rank), Pezizomycotina (subphylum), saccharomyceta (no rank), Ascomycota (phylum), Dikarya (subkingdom), Fungi (kingdom), Opisthokonta (no rank), Eukaryota (superkingdom), cellular organisms (no rank)
A0A0U5GSB2_ASPCI	ASPCAL04894	A0A1L9T5S9	7.2e-10	no	GRRRSCDRCIRLKKSCNSRQPCQRCTSQDVACCYSTSSSS	Fungal_trans domain-containing protein	Aspergillus calidoustus	Pathogen	Aspergillus subgen. Nidulantes (subgenus), Aspergillus (genus), Aspergillaceae (family), Eurotiales (order), Eurotiomycetidae (subclass), Eurotiomycetes (class), leotiomyceta (no rank), Pezizomycotina (subphylum), saccharomyceta (no rank), Ascomycota (phylum), Dikarya (subkingdom), Fungi (kingdom), Opisthokonta (no rank), Eukaryota (superkingdom), cellular organisms (no rank)
A0A0U5G2Q1_ASPCI	ASPCAL04934	A0A0D2BPV7	1.5e-09	no	PVTACDACrANKRKCRLDTKDTVCIRCSSLKIECS	Fungal_trans domain-containing protein	Aspergillus calidoustus	Pathogen	Aspergillus subgen. Nidulantes (subgenus), Aspergillus (genus), Aspergillaceae (family), Eurotiales (order), Eurotiomycetidae (subclass), Eurotiomycetes (class), leotiomyceta (no rank), Pezizomycotina (subphylum), saccharomyceta (no rank), Ascomycota (phylum), Dikarya (subkingdom), Fungi (kingdom), Opisthokonta (no rank), Eukaryota (superkingdom), cellular organisms (no rank)
A0A0U5C6N3_ASPCI	ASPCAL05189	A0A0U5G0N0	3.2e-13	yes	ACDHCRRSKSRCEKTDGSPSCIACEARGIACIITPQTIRQMG	Fungal_trans domain-containing protein	Aspergillus calidoustus	Pathogen	Aspergillus subgen. Nidulantes (subgenus), Aspergillus (genus), Aspergillaceae (family), Eurotiales (order), Eurotiomycetidae (subclass), Eurotiomycetes (class), leotiomyceta (no rank), Pezizomycotina (subphylum), saccharomyceta (no rank), Ascomycota (phylum), Dikarya (subkingdom), Fungi (kingdom), Opisthokonta (no rank), Eukaryota (superkingdom), cellular organisms (no rank)
A0A0U4Z377_ASPCI	ASPCAL05249	C7YX34	4.9e-08	no	PQSACLACrERRKRCDRLHRGTSCTFCSARKLECL	Fungal_trans domain-containing protein	Aspergillus calidoustus	Pathogen	Aspergillus subgen. Nidulantes (subgenus), Aspergillus (genus), Aspergillaceae (family), Eurotiales (order), Eurotiomycetidae (subclass), Eurotiomycetes (class), leotiomyceta (no rank), Pezizomycotina (subphylum), saccharomyceta (no rank), Ascomycota (phylum), Dikarya (subkingdom), Fungi (kingdom), Opisthokonta (no rank), Eukaryota (superkingdom), cellular organisms (no rank)
A0A0U5G225_ASPCI	ASPCAL05781	A0A1L9TFA8	1.5e-15	no	RNRAACKRCQKRKIRCDGNLPTCGSCRKAGVPCINDGKQEVHRSF	Fungal_trans domain-containing protein	Aspergillus calidoustus	Pathogen	Aspergillus subgen. Nidulantes (subgenus), Aspergillus (genus), Aspergillaceae (family), Eurotiales (order), Eurotiomycetidae (subclass), Eurotiomycetes (class), leotiomyceta (no rank), Pezizomycotina (subphylum), saccharomyceta (no rank), Ascomycota (phylum), Dikarya (subkingdom), Fungi (kingdom), Opisthokonta (no rank), Eukaryota (superkingdom), cellular organisms (no rank)
A0A0U5FZY7_ASPCI	ASPCAL06023	A0A0B8MXH9	1.1e-13	no	PCESSCERCKGRKIKCNRQYPMCQRCAEARASCEYSGKKKPGF	Fungal_trans domain-containing protein	Aspergillus calidoustus	Pathogen	Aspergillus subgen. Nidulantes (subgenus), Aspergillus (genus), Aspergillaceae (family), Eurotiales (order), Eurotiomycetidae (subclass), Eurotiomycetes (class), leotiomyceta (no rank), Pezizomycotina (subphylum), saccharomyceta (no rank), Ascomycota (phylum), Dikarya (subkingdom), Fungi (kingdom), Opisthokonta (no rank), Eukaryota (superkingdom), cellular organisms (no rank)
A0A0U5G2W6_ASPCI	ASPCAL06050	B8NQB2	3.3e-13	no	ERNPSCLICRRRKIRCDRTPGTCHRCRKIGEQCIYSVASAPSSP	Fungal_trans domain-containing protein	Aspergillus calidoustus	Pathogen	Aspergillus subgen. Nidulantes (subgenus), Aspergillus (genus), Aspergillaceae (family), Eurotiales (order), Eurotiomycetidae (subclass), Eurotiomycetes (class), leotiomyceta (no rank), Pezizomycotina (subphylum), saccharomyceta (no rank), Ascomycota (phylum), Dikarya (subkingdom), Fungi (kingdom), Opisthokonta (no rank), Eukaryota (superkingdom), cellular organisms (no rank)
A0A0U5G5Y9_ASPCI	ASPCAL06097	A0A1L9T202	5.2e-12	no	TKQSSACTGCKARKTKCSGTHPCEKCTLSGRECIFPAGLDRRRK	Fungal_trans domain-containing protein	Aspergillus calidoustus	Pathogen	Aspergillus subgen. Nidulantes (subgenus), Aspergillus (genus), Aspergillaceae (family), Eurotiales (order), Eurotiomycetidae (subclass), Eurotiomycetes (class), leotiomyceta (no rank), Pezizomycotina (subphylum), saccharomyceta (no rank), Ascomycota (phylum), Dikarya (subkingdom), Fungi (kingdom), Opisthokonta (no rank), Eukaryota (superkingdom), cellular organisms (no rank)
A0A0U4Z5I7_ASPCI	ASPCAL06119	A0A0C1E2U3	3.5e-13	no	PMVSCTLCRRRKIRCNRESPCSNCVKSKCEPCVYDSNNVLRPQ	Fungal_trans domain-containing protein	Aspergillus calidoustus	Pathogen	Aspergillus subgen. Nidulantes (subgenus), Aspergillus (genus), Aspergillaceae (family), Eurotiales (order), Eurotiomycetidae (subclass), Eurotiomycetes (class), leotiomyceta (no rank), Pezizomycotina (subphylum), saccharomyceta (no rank), Ascomycota (phylum), Dikarya (subkingdom), Fungi (kingdom), Opisthokonta (no rank), Eukaryota (superkingdom), cellular organisms (no rank)
A0A0U5G3L5_ASPCI	ASPCAL06619	A0A1L9PTX5	5.6e-08	no	ACLACRKVKMKCVTSEGDNRCVRCARKSLQCVVREHCRGRKPG	Fungal_trans domain-containing protein	Aspergillus calidoustus	Pathogen	Aspergillus subgen. Nidulantes (subgenus), Aspergillus (genus), Aspergillaceae (family), Eurotiales (order), Eurotiomycetidae (subclass), Eurotiomycetes (class), leotiomyceta (no rank), Pezizomycotina (subphylum), saccharomyceta (no rank), Ascomycota (phylum), Dikarya (subkingdom), Fungi (kingdom), Opisthokonta (no rank), Eukaryota (superkingdom), cellular organisms (no rank)
A0A0U5G1P0_ASPCI	ASPCAL06641	A0A1L9PB31	1.9e-13	no	RPVCDRCRRLKKRCDRKVPDCANCVHAGRNCSYEALQARVQQ	Fungal_trans domain-containing protein	Aspergillus calidoustus	Pathogen	Aspergillus subgen. Nidulantes (subgenus), Aspergillus (genus), Aspergillaceae (family), Eurotiales (order), Eurotiomycetidae (subclass), Eurotiomycetes (class), leotiomyceta (no rank), Pezizomycotina (subphylum), saccharomyceta (no rank), Ascomycota (phylum), Dikarya (subkingdom), Fungi (kingdom), Opisthokonta (no rank), Eukaryota (superkingdom), cellular organisms (no rank)
A0A0U5C9E5_ASPCI	ASPCAL06711	A0A0F8UMM6	5e-17	no	NRASYSCHTCRRRKVKCDKVHPICGNCVKNGTECIYDPTSHKDA	Putative C6 transcription factor	Aspergillus calidoustus	Pathogen	Aspergillus subgen. Nidulantes (subgenus), Aspergillus (genus), Aspergillaceae (family), Eurotiales (order), Eurotiomycetidae (subclass), Eurotiomycetes (class), leotiomyceta (no rank), Pezizomycotina (subphylum), saccharomyceta (no rank), Ascomycota (phylum), Dikarya (subkingdom), Fungi (kingdom), Opisthokonta (no rank), Eukaryota (superkingdom), cellular organisms (no rank)
A0A0U5G2G6_ASPCI	ASPCAL06878	A0A1L9P7P4	7.2e-14	no	ACDLCYRKRIKCDAQRPRCSHCVVYDSACTFEAASRKRRTK	Fungal_trans domain-containing protein	Aspergillus calidoustus	Pathogen	Aspergillus subgen. Nidulantes (subgenus), Aspergillus (genus), Aspergillaceae (family), Eurotiales (order), Eurotiomycetidae (subclass), Eurotiomycetes (class), leotiomyceta (no rank), Pezizomycotina (subphylum), saccharomyceta (no rank), Ascomycota (phylum), Dikarya (subkingdom), Fungi (kingdom), Opisthokonta (no rank), Eukaryota (superkingdom), cellular organisms (no rank)
A0A0U4ZY63_ASPCI	ASPCAL07608	A0A1L9Q1Q3	1.2e-12	no	QTRIRGACDSCATAKVRCSPSLPCTRCAKKGIPCTKRAGQRS	Fungal_trans domain-containing protein	Aspergillus calidoustus	Pathogen	Aspergillus subgen. Nidulantes (subgenus), Aspergillus (genus), Aspergillaceae (family), Eurotiales (order), Eurotiomycetidae (subclass), Eurotiomycetes (class), leotiomyceta (no rank), Pezizomycotina (subphylum), saccharomyceta (no rank), Ascomycota (phylum), Dikarya (subkingdom), Fungi (kingdom), Opisthokonta (no rank), Eukaryota (superkingdom), cellular organisms (no rank)
A0A0U5GPM2_ASPCI	ASPCAL07753	A0A074VGZ7	3.7e-11	no	KRITQACDFCHRRGLKCKSDENVQLSLQPSCLTCLEYGQECTRKRQPKKRGT	Fungal_trans domain-containing protein	Aspergillus calidoustus	Pathogen	Aspergillus subgen. Nidulantes (subgenus), Aspergillus (genus), Aspergillaceae (family), Eurotiales (order), Eurotiomycetidae (subclass), Eurotiomycetes (class), leotiomyceta (no rank), Pezizomycotina (subphylum), saccharomyceta (no rank), Ascomycota (phylum), Dikarya (subkingdom), Fungi (kingdom), Opisthokonta (no rank), Eukaryota (superkingdom), cellular organisms (no rank)
A0A0U5GNG7_ASPCI	ASPCAL07759	A0A0U5GNB5	1.4e-11	yes	LRAPVACVACNKKKVRCTYDQGSHKCRNCLRYRWPCRQRQPKRRGRQP	Fungal_trans domain-containing protein	Aspergillus calidoustus	Pathogen	Aspergillus subgen. Nidulantes (subgenus), Aspergillus (genus), Aspergillaceae (family), Eurotiales (order), Eurotiomycetidae (subclass), Eurotiomycetes (class), leotiomyceta (no rank), Pezizomycotina (subphylum), saccharomyceta (no rank), Ascomycota (phylum), Dikarya (subkingdom), Fungi (kingdom), Opisthokonta (no rank), Eukaryota (superkingdom), cellular organisms (no rank)
A0A0U5GR12_ASPCI	ASPCAL07807	A0A1L9Q040	3.7e-11	no	NGRVSQACKACATSKLKCDEEKPCRRCCDRKLFCDYQESGVNN	Fungal_trans domain-containing protein	Aspergillus calidoustus	Pathogen	Aspergillus subgen. Nidulantes (subgenus), Aspergillus (genus), Aspergillaceae (family), Eurotiales (order), Eurotiomycetidae (subclass), Eurotiomycetes (class), leotiomyceta (no rank), Pezizomycotina (subphylum), saccharomyceta (no rank), Ascomycota (phylum), Dikarya (subkingdom), Fungi (kingdom), Opisthokonta (no rank), Eukaryota (superkingdom), cellular organisms (no rank)
A0A0U5GT95_ASPCI	ASPCAL07952	A0A084G7P1	4.4e-14	no	KRGATACQLCRVRKTKCDNARPACGFCAQHKAKCVYGSSSE	Fungal_trans domain-containing protein	Aspergillus calidoustus	Pathogen	Aspergillus subgen. Nidulantes (subgenus), Aspergillus (genus), Aspergillaceae (family), Eurotiales (order), Eurotiomycetidae (subclass), Eurotiomycetes (class), leotiomyceta (no rank), Pezizomycotina (subphylum), saccharomyceta (no rank), Ascomycota (phylum), Dikarya (subkingdom), Fungi (kingdom), Opisthokonta (no rank), Eukaryota (superkingdom), cellular organisms (no rank)
A0A0U5CQW7_ASPCI	ASPCAL08658	A0A0L1J6X0	3.7e-16	no	RAPEACSFCRRRKIKCNSEKPVCANCKTYAQDCIYEPISETAREA	Putative Nitrate assimilation regulatory protein nirA	Aspergillus calidoustus	Pathogen	Aspergillus subgen. Nidulantes (subgenus), Aspergillus (genus), Aspergillaceae (family), Eurotiales (order), Eurotiomycetidae (subclass), Eurotiomycetes (class), leotiomyceta (no rank), Pezizomycotina (subphylum), saccharomyceta (no rank), Ascomycota (phylum), Dikarya (subkingdom), Fungi (kingdom), Opisthokonta (no rank), Eukaryota (superkingdom), cellular organisms (no rank)
A0A0U5HMF2_ASPCI	ASPCAL09453	A0A1L9P7B0	5.3e-06	no	RPATACTECQRRKQKASEQCSREWPCNHCQTRKIAHRCKFAPRRTVRVA	Fungal_trans domain-containing protein	Aspergillus calidoustus	Pathogen	Aspergillus subgen. Nidulantes (subgenus), Aspergillus (genus), Aspergillaceae (family), Eurotiales (order), Eurotiomycetidae (subclass), Eurotiomycetes (class), leotiomyceta (no rank), Pezizomycotina (subphylum), saccharomyceta (no rank), Ascomycota (phylum), Dikarya (subkingdom), Fungi (kingdom), Opisthokonta (no rank), Eukaryota (superkingdom), cellular organisms (no rank)
A0A0U5GUR1_ASPCI	ASPCAL09571	A0A1L9S3E5	8.5e-16	no	PEFRACTECRKRKSKCSGTTPCLYCSRNNKECVFNRAPSRTPLT	Fungal_trans domain-containing protein	Aspergillus calidoustus	Pathogen	Aspergillus subgen. Nidulantes (subgenus), Aspergillus (genus), Aspergillaceae (family), Eurotiales (order), Eurotiomycetidae (subclass), Eurotiomycetes (class), leotiomyceta (no rank), Pezizomycotina (subphylum), saccharomyceta (no rank), Ascomycota (phylum), Dikarya (subkingdom), Fungi (kingdom), Opisthokonta (no rank), Eukaryota (superkingdom), cellular organisms (no rank)
A0A0U5GWY1_ASPCI	ASPCAL09589	A0A0U5G481	1.1e-15	no	AANACATCRSQKRRCDKKLPVCSRCSkTGADCNYHWLHEEQQFG	Fungal_trans domain-containing protein	Aspergillus calidoustus	Pathogen	Aspergillus subgen. Nidulantes (subgenus), Aspergillus (genus), Aspergillaceae (family), Eurotiales (order), Eurotiomycetidae (subclass), Eurotiomycetes (class), leotiomyceta (no rank), Pezizomycotina (subphylum), saccharomyceta (no rank), Ascomycota (phylum), Dikarya (subkingdom), Fungi (kingdom), Opisthokonta (no rank), Eukaryota (superkingdom), cellular organisms (no rank)
A0A0U5G5F8_ASPCI	ASPCAL09600	A0A0G2HPR0	8.4e-12	no	RRSLQACVSCHDRKVRCDYSVSGAPCTNCRLDYRECVVR	Fungal_trans domain-containing protein	Aspergillus calidoustus	Pathogen	Aspergillus subgen. Nidulantes (subgenus), Aspergillus (genus), Aspergillaceae (family), Eurotiales (order), Eurotiomycetidae (subclass), Eurotiomycetes (class), leotiomyceta (no rank), Pezizomycotina (subphylum), saccharomyceta (no rank), Ascomycota (phylum), Dikarya (subkingdom), Fungi (kingdom), Opisthokonta (no rank), Eukaryota (superkingdom), cellular organisms (no rank)
A0A0U5G3D3_ASPCI	ASPCAL09703	A0A0U5G481	1.5e-12	no	YSANACACCRSQKRRCDKTLPSCSRCTkMKTNCSYHWDQWAPQFN	Fungal_trans domain-containing protein	Aspergillus calidoustus	Pathogen	Aspergillus subgen. Nidulantes (subgenus), Aspergillus (genus), Aspergillaceae (family), Eurotiales (order), Eurotiomycetidae (subclass), Eurotiomycetes (class), leotiomyceta (no rank), Pezizomycotina (subphylum), saccharomyceta (no rank), Ascomycota (phylum), Dikarya (subkingdom), Fungi (kingdom), Opisthokonta (no rank), Eukaryota (superkingdom), cellular organisms (no rank)
A0A0U5G4Z0_ASPCI	ASPCAL09967	A0A1M3T427	2.6e-11	no	KRASMACLACKKSKRKCSGTYRCDNCVAYGRECVFDETKDQRRR	Fungal_trans domain-containing protein	Aspergillus calidoustus	Pathogen	Aspergillus subgen. Nidulantes (subgenus), Aspergillus (genus), Aspergillaceae (family), Eurotiales (order), Eurotiomycetidae (subclass), Eurotiomycetes (class), leotiomyceta (no rank), Pezizomycotina (subphylum), saccharomyceta (no rank), Ascomycota (phylum), Dikarya (subkingdom), Fungi (kingdom), Opisthokonta (no rank), Eukaryota (superkingdom), cellular organisms (no rank)
A0A0U5G738_ASPCI	ASPCAL10181	A0A0U5H004	1.9e-13	no	RVLRACDRCASHKQRCDGRDPcQRCSeRELSCQYQKVQRRRGRP	Fungal_trans domain-containing protein	Aspergillus calidoustus	Pathogen	Aspergillus subgen. Nidulantes (subgenus), Aspergillus (genus), Aspergillaceae (family), Eurotiales (order), Eurotiomycetidae (subclass), Eurotiomycetes (class), leotiomyceta (no rank), Pezizomycotina (subphylum), saccharomyceta (no rank), Ascomycota (phylum), Dikarya (subkingdom), Fungi (kingdom), Opisthokonta (no rank), Eukaryota (superkingdom), cellular organisms (no rank)
A0A0U5G693_ASPCI	ASPCAL10310	A0A150VD55	1.7e-06	no	IACEPCRQKKCKNKHRPVCSQCADPARCVYPESGKR	Putative Miscellaneous Zn(II)2Cys6 transcription factor (Eurofung)	Aspergillus calidoustus	Pathogen	Aspergillus subgen. Nidulantes (subgenus), Aspergillus (genus), Aspergillaceae (family), Eurotiales (order), Eurotiomycetidae (subclass), Eurotiomycetes (class), leotiomyceta (no rank), Pezizomycotina (subphylum), saccharomyceta (no rank), Ascomycota (phylum), Dikarya (subkingdom), Fungi (kingdom), Opisthokonta (no rank), Eukaryota (superkingdom), cellular organisms (no rank)
A0A0U5CEP4_ASPCI	ASPCAL11608	A0A1L9TU97	6.5e-13	no	RSRIACTWCRDRKVRCDASSHGVPCTNCELDQQECVVHSASQIRNIR	Fungal_trans domain-containing protein	Aspergillus calidoustus	Pathogen	Aspergillus subgen. Nidulantes (subgenus), Aspergillus (genus), Aspergillaceae (family), Eurotiales (order), Eurotiomycetidae (subclass), Eurotiomycetes (class), leotiomyceta (no rank), Pezizomycotina (subphylum), saccharomyceta (no rank), Ascomycota (phylum), Dikarya (subkingdom), Fungi (kingdom), Opisthokonta (no rank), Eukaryota (superkingdom), cellular organisms (no rank)
A0A0U5GA08_ASPCI	ASPCAL11625	N4VUN5	2.5e-13	no	SDLPSCDGCRRRKLRCSREWPTCSHCKRLdSRCTYEYQRKKPGLK	Fungal_trans domain-containing protein	Aspergillus calidoustus	Pathogen	Aspergillus subgen. Nidulantes (subgenus), Aspergillus (genus), Aspergillaceae (family), Eurotiales (order), Eurotiomycetidae (subclass), Eurotiomycetes (class), leotiomyceta (no rank), Pezizomycotina (subphylum), saccharomyceta (no rank), Ascomycota (phylum), Dikarya (subkingdom), Fungi (kingdom), Opisthokonta (no rank), Eukaryota (superkingdom), cellular organisms (no rank)
A0A0U5GEA1_ASPCI	ASPCAL12165	I8TKC1	1.5e-14	no	RRPPLACEQCRRRKIRCDRKSPCSNCMRSRRSSCTYV	Fungal_trans domain-containing protein	Aspergillus calidoustus	Pathogen	Aspergillus subgen. Nidulantes (subgenus), Aspergillus (genus), Aspergillaceae (family), Eurotiales (order), Eurotiomycetidae (subclass), Eurotiomycetes (class), leotiomyceta (no rank), Pezizomycotina (subphylum), saccharomyceta (no rank), Ascomycota (phylum), Dikarya (subkingdom), Fungi (kingdom), Opisthokonta (no rank), Eukaryota (superkingdom), cellular organisms (no rank)
A0A0U5GD90_ASPCI	ASPCAL12331	C8VR94	2.3e-14	no	KRSNACLSCRTRRIKCGGNQPCDNCVANSCDCVFVAESDRRRKF	Fungal_trans domain-containing protein	Aspergillus calidoustus	Pathogen	Aspergillus subgen. Nidulantes (subgenus), Aspergillus (genus), Aspergillaceae (family), Eurotiales (order), Eurotiomycetidae (subclass), Eurotiomycetes (class), leotiomyceta (no rank), Pezizomycotina (subphylum), saccharomyceta (no rank), Ascomycota (phylum), Dikarya (subkingdom), Fungi (kingdom), Opisthokonta (no rank), Eukaryota (superkingdom), cellular organisms (no rank)
A0A0U5GF11_ASPCI	ASPCAL12411	A0A194W9X0	4.1e-13	no	RVGRACDQCNFSRTRCDGDLPcGRCDaLAHRCQYNRQVKKRGRK	Fungal_trans domain-containing protein	Aspergillus calidoustus	Pathogen	Aspergillus subgen. Nidulantes (subgenus), Aspergillus (genus), Aspergillaceae (family), Eurotiales (order), Eurotiomycetidae (subclass), Eurotiomycetes (class), leotiomyceta (no rank), Pezizomycotina (subphylum), saccharomyceta (no rank), Ascomycota (phylum), Dikarya (subkingdom), Fungi (kingdom), Opisthokonta (no rank), Eukaryota (superkingdom), cellular organisms (no rank)
A0A0U5GCJ6_ASPCI	ASPCAL12453	A0A1L9P9W2	2.1e-11	no	RSSGVCTLCHARKVRCDLIVTGGPCTNCRLDRQTCMLRPRRKRSHRR	Fungal_trans domain-containing protein	Aspergillus calidoustus	Pathogen	Aspergillus subgen. Nidulantes (subgenus), Aspergillus (genus), Aspergillaceae (family), Eurotiales (order), Eurotiomycetidae (subclass), Eurotiomycetes (class), leotiomyceta (no rank), Pezizomycotina (subphylum), saccharomyceta (no rank), Ascomycota (phylum), Dikarya (subkingdom), Fungi (kingdom), Opisthokonta (no rank), Eukaryota (superkingdom), cellular organisms (no rank)
A0A0U5GED2_ASPCI	ASPCAL13338	A0A0C1C324	1.4e-13	no	KRASRACQRCHARKVRCDATVTGYPCTNCRLDSSPCQAYTGGRERRK	Fungal_trans domain-containing protein	Aspergillus calidoustus	Pathogen	Aspergillus subgen. Nidulantes (subgenus), Aspergillus (genus), Aspergillaceae (family), Eurotiales (order), Eurotiomycetidae (subclass), Eurotiomycetes (class), leotiomyceta (no rank), Pezizomycotina (subphylum), saccharomyceta (no rank), Ascomycota (phylum), Dikarya (subkingdom), Fungi (kingdom), Opisthokonta (no rank), Eukaryota (superkingdom), cellular organisms (no rank)
A0A0U5GD27_ASPCI	ASPCAL13395	A0A1L9VXW5	3.1e-13	no	ACDSCRALKARCDGGSPCRECSRRQIACSLEQHESLGRR	Fungal_trans domain-containing protein	Aspergillus calidoustus	Pathogen	Aspergillus subgen. Nidulantes (subgenus), Aspergillus (genus), Aspergillaceae (family), Eurotiales (order), Eurotiomycetidae (subclass), Eurotiomycetes (class), leotiomyceta (no rank), Pezizomycotina (subphylum), saccharomyceta (no rank), Ascomycota (phylum), Dikarya (subkingdom), Fungi (kingdom), Opisthokonta (no rank), Eukaryota (superkingdom), cellular organisms (no rank)
A0A0U4ZLA9_ASPCI	ASPCAL13509	A0A0U5H8D6	8.3e-11	yes	RTTIACMRCrAGKVKCTHDGTPPCRGCIKAGRTAPGSCVLSGPTPKKARS	Fungal_trans domain-containing protein	Aspergillus calidoustus	Pathogen	Aspergillus subgen. Nidulantes (subgenus), Aspergillus (genus), Aspergillaceae (family), Eurotiales (order), Eurotiomycetidae (subclass), Eurotiomycetes (class), leotiomyceta (no rank), Pezizomycotina (subphylum), saccharomyceta (no rank), Ascomycota (phylum), Dikarya (subkingdom), Fungi (kingdom), Opisthokonta (no rank), Eukaryota (superkingdom), cellular organisms (no rank)
A0A0U5GHW3_ASPCI	ASPCAL13534	A0A1L9PYG3	4.1e-14	no	RIPKACQECRKRKIKCNGETPCKTCQLRNTPCLYRDVTRSRKRK	Fungal_trans domain-containing protein	Aspergillus calidoustus	Pathogen	Aspergillus subgen. Nidulantes (subgenus), Aspergillus (genus), Aspergillaceae (family), Eurotiales (order), Eurotiomycetidae (subclass), Eurotiomycetes (class), leotiomyceta (no rank), Pezizomycotina (subphylum), saccharomyceta (no rank), Ascomycota (phylum), Dikarya (subkingdom), Fungi (kingdom), Opisthokonta (no rank), Eukaryota (superkingdom), cellular organisms (no rank)
A0A0U5GF05_ASPCI	ASPCAL13578	A0A1L9T2D9	1.9e-12	no	RSTIACHSCRSRKVRCSINATGIPCIRCAQDHAECVLESTNSAPRAS	Fungal_trans domain-containing protein	Aspergillus calidoustus	Pathogen	Aspergillus subgen. Nidulantes (subgenus), Aspergillus (genus), Aspergillaceae (family), Eurotiales (order), Eurotiomycetidae (subclass), Eurotiomycetes (class), leotiomyceta (no rank), Pezizomycotina (subphylum), saccharomyceta (no rank), Ascomycota (phylum), Dikarya (subkingdom), Fungi (kingdom), Opisthokonta (no rank), Eukaryota (superkingdom), cellular organisms (no rank)
A0A0U5GGG9_ASPCI	ASPCAL13975	A0A1L9PNP1	2.6e-14	no	RVRRACDRCNTSRTRCSGETPcGRCAkLNYPCQYQRTARKRGPK	Fungal_trans domain-containing protein	Aspergillus calidoustus	Pathogen	Aspergillus subgen. Nidulantes (subgenus), Aspergillus (genus), Aspergillaceae (family), Eurotiales (order), Eurotiomycetidae (subclass), Eurotiomycetes (class), leotiomyceta (no rank), Pezizomycotina (subphylum), saccharomyceta (no rank), Ascomycota (phylum), Dikarya (subkingdom), Fungi (kingdom), Opisthokonta (no rank), Eukaryota (superkingdom), cellular organisms (no rank)
A0A0U5GM03_ASPCI	ASPCAL14066	A0A0F7TIQ7	3.4e-12	no	KRIRQACASCRRRKSRCSGERPVCLQCRRTRNCCVYEPYSVTV	Fungal_trans domain-containing protein	Aspergillus calidoustus	Pathogen	Aspergillus subgen. Nidulantes (subgenus), Aspergillus (genus), Aspergillaceae (family), Eurotiales (order), Eurotiomycetidae (subclass), Eurotiomycetes (class), leotiomyceta (no rank), Pezizomycotina (subphylum), saccharomyceta (no rank), Ascomycota (phylum), Dikarya (subkingdom), Fungi (kingdom), Opisthokonta (no rank), Eukaryota (superkingdom), cellular organisms (no rank)
A0A0U5GGP7_ASPCI	ASPCAL14298	A0A1L9Q345	1.4e-16	no	RRPLACVRCRRRKVRCDGALPACSNCAKAGVECFEGRALGSVSRs	Fungal_trans domain-containing protein	Aspergillus calidoustus	Pathogen	Aspergillus subgen. Nidulantes (subgenus), Aspergillus (genus), Aspergillaceae (family), Eurotiales (order), Eurotiomycetidae (subclass), Eurotiomycetes (class), leotiomyceta (no rank), Pezizomycotina (subphylum), saccharomyceta (no rank), Ascomycota (phylum), Dikarya (subkingdom), Fungi (kingdom), Opisthokonta (no rank), Eukaryota (superkingdom), cellular organisms (no rank)
A0A0U5GHF8_ASPCI	ASPCAL14405	A0A1L9PWD9	7.6e-08	no	KYFSCTLCKCDRTFPCENCLRAKVQCVPASQLPRHRKR	Fungal_trans domain-containing protein	Aspergillus calidoustus	Pathogen	Aspergillus subgen. Nidulantes (subgenus), Aspergillus (genus), Aspergillaceae (family), Eurotiales (order), Eurotiomycetidae (subclass), Eurotiomycetes (class), leotiomyceta (no rank), Pezizomycotina (subphylum), saccharomyceta (no rank), Ascomycota (phylum), Dikarya (subkingdom), Fungi (kingdom), Opisthokonta (no rank), Eukaryota (superkingdom), cellular organisms (no rank)
A0A0U5GFU1_ASPCI	ASPCAL14416	A0A1L9PWC4	1.2e-16	no	KLGQAcDRCRkKKIKCDGELPKCRNCTRGGKPCEASAPLQRNTRV	Fungal_trans domain-containing protein	Aspergillus calidoustus	Pathogen	Aspergillus subgen. Nidulantes (subgenus), Aspergillus (genus), Aspergillaceae (family), Eurotiales (order), Eurotiomycetidae (subclass), Eurotiomycetes (class), leotiomyceta (no rank), Pezizomycotina (subphylum), saccharomyceta (no rank), Ascomycota (phylum), Dikarya (subkingdom), Fungi (kingdom), Opisthokonta (no rank), Eukaryota (superkingdom), cellular organisms (no rank)
A0A2I2FID4_9EURO	BDW47DRAFT_101915	A0A0G4PB90	1.5e-14	no	RTRQACGPCrRKKARCPGEKPTCSLCQRLGQNCSYGLQANRVRSS	Fungal_trans domain-containing protein	Aspergillus candidus	Pathogen	Aspergillus (genus), Aspergillaceae (family), Eurotiales (order), Eurotiomycetidae (subclass), Eurotiomycetes (class), leotiomyceta (no rank), Pezizomycotina (subphylum), saccharomyceta (no rank), Ascomycota (phylum), Dikarya (subkingdom), Fungi (kingdom), Opisthokonta (no rank), Eukaryota (superkingdom), cellular organisms (no rank)
A0A2I2FGM3_9EURO	BDW47DRAFT_102403	A0A2J5HNA8	4.6e-14	no	HRSAVACDVCRQRKVRCSLSVTGAPCSGCVQDGTNCLVSSRKTRG	Fungal-specific transcription factor domain-domain-containing protein	Aspergillus candidus	Pathogen	Aspergillus (genus), Aspergillaceae (family), Eurotiales (order), Eurotiomycetidae (subclass), Eurotiomycetes (class), leotiomyceta (no rank), Pezizomycotina (subphylum), saccharomyceta (no rank), Ascomycota (phylum), Dikarya (subkingdom), Fungi (kingdom), Opisthokonta (no rank), Eukaryota (superkingdom), cellular organisms (no rank)
A0A2I2FN37_9EURO	BDW47DRAFT_114815	A0A2J5HHL3	4.8e-14	no	PVKVACLTcRASRTRCDGQDPCSNCLSKKKKCSYLPSKRGGPRK	Fungal_trans domain-containing protein	Aspergillus candidus	Pathogen	Aspergillus (genus), Aspergillaceae (family), Eurotiales (order), Eurotiomycetidae (subclass), Eurotiomycetes (class), leotiomyceta (no rank), Pezizomycotina (subphylum), saccharomyceta (no rank), Ascomycota (phylum), Dikarya (subkingdom), Fungi (kingdom), Opisthokonta (no rank), Eukaryota (superkingdom), cellular organisms (no rank)
A0A2I2FDF3_9EURO	BDW47DRAFT_117108	A0A0F0IGP2	7.5e-11	no	SHRHPACLACRKRKSRCKTRDAPCCIMCQVHGTECVFP	Mitochondrial escape protein 2	Aspergillus candidus	Pathogen	Aspergillus (genus), Aspergillaceae (family), Eurotiales (order), Eurotiomycetidae (subclass), Eurotiomycetes (class), leotiomyceta (no rank), Pezizomycotina (subphylum), saccharomyceta (no rank), Ascomycota (phylum), Dikarya (subkingdom), Fungi (kingdom), Opisthokonta (no rank), Eukaryota (superkingdom), cellular organisms (no rank)
A0A2I2FCJ7_9EURO	BDW47DRAFT_117346	A0A2J5HY71	1.7e-14	no	PRASRACETCRVRKTKCDQAQPCSYCDDHSLDCFYRETGSTDSP	Fungal-specific transcription factor domain-domain-containing protein	Aspergillus candidus	Pathogen	Aspergillus (genus), Aspergillaceae (family), Eurotiales (order), Eurotiomycetidae (subclass), Eurotiomycetes (class), leotiomyceta (no rank), Pezizomycotina (subphylum), saccharomyceta (no rank), Ascomycota (phylum), Dikarya (subkingdom), Fungi (kingdom), Opisthokonta (no rank), Eukaryota (superkingdom), cellular organisms (no rank)
A0A2I2F8I8_9EURO	BDW47DRAFT_118432	A0A1L9PZ32	7e-06	no	CGYCLTNNICCRETTEHDCRTCQGWGVQCP	Fungal-specific transcription factor domain-domain-containing protein	Aspergillus candidus	Pathogen	Aspergillus (genus), Aspergillaceae (family), Eurotiales (order), Eurotiomycetidae (subclass), Eurotiomycetes (class), leotiomyceta (no rank), Pezizomycotina (subphylum), saccharomyceta (no rank), Ascomycota (phylum), Dikarya (subkingdom), Fungi (kingdom), Opisthokonta (no rank), Eukaryota (superkingdom), cellular organisms (no rank)
A0A2I2FPN1_9EURO	BDW47DRAFT_121687	A0A084G630	9.4e-15	no	KPQLSCNPCRRRkSRCDRKRPCTLCSIRGQTCTFSENSSTVAGPSR	Carrier domain-containing protein	Aspergillus candidus	Pathogen	Aspergillus (genus), Aspergillaceae (family), Eurotiales (order), Eurotiomycetidae (subclass), Eurotiomycetes (class), leotiomyceta (no rank), Pezizomycotina (subphylum), saccharomyceta (no rank), Ascomycota (phylum), Dikarya (subkingdom), Fungi (kingdom), Opisthokonta (no rank), Eukaryota (superkingdom), cellular organisms (no rank)
A0A2I2FIG7_9EURO	BDW47DRAFT_123451	A0A1L9PZ32	6.5e-09	no	GCGYCLSNKIACDAQNGTPCLTCRHWKIRCP	Fungal_trans domain-containing protein	Aspergillus candidus	Pathogen	Aspergillus (genus), Aspergillaceae (family), Eurotiales (order), Eurotiomycetidae (subclass), Eurotiomycetes (class), leotiomyceta (no rank), Pezizomycotina (subphylum), saccharomyceta (no rank), Ascomycota (phylum), Dikarya (subkingdom), Fungi (kingdom), Opisthokonta (no rank), Eukaryota (superkingdom), cellular organisms (no rank)
A0A2I2FF93_9EURO	BDW47DRAFT_130949	A0A093XP45	5.3e-11	nono_3566	AKWQVCYNCRRQKRKGDRVQPSCSRCITNG	Fungal-specific transcription factor domain-domain-containing protein	Aspergillus candidus	Pathogen	Aspergillus (genus), Aspergillaceae (family), Eurotiales (order), Eurotiomycetidae (subclass), Eurotiomycetes (class), leotiomyceta (no rank), Pezizomycotina (subphylum), saccharomyceta (no rank), Ascomycota (phylum), Dikarya (subkingdom), Fungi (kingdom), Opisthokonta (no rank), Eukaryota (superkingdom), cellular organisms (no rank)
A0A2I2FFD6_9EURO	BDW47DRAFT_130978	A0A0G4PTY9	2.2e-10	no	ACSGCHHRKIRCDVTTRGSPCTSCHFYDVPCD	Fungal-specific transcription factor domain-domain-containing protein	Aspergillus candidus	Pathogen	Aspergillus (genus), Aspergillaceae (family), Eurotiales (order), Eurotiomycetidae (subclass), Eurotiomycetes (class), leotiomyceta (no rank), Pezizomycotina (subphylum), saccharomyceta (no rank), Ascomycota (phylum), Dikarya (subkingdom), Fungi (kingdom), Opisthokonta (no rank), Eukaryota (superkingdom), cellular organisms (no rank)
A0A2I2FFY4_9EURO	BDW47DRAFT_13788	A0A0F7TFI9	2e-14	no	TKVGSACKRCRHQKLKCDIQRPCTLCVRAGVDCQSYDRWRAVQ	Fungal-specific transcription factor domain-domain-containing protein	Aspergillus candidus	Pathogen	Aspergillus (genus), Aspergillaceae (family), Eurotiales (order), Eurotiomycetidae (subclass), Eurotiomycetes (class), leotiomyceta (no rank), Pezizomycotina (subphylum), saccharomyceta (no rank), Ascomycota (phylum), Dikarya (subkingdom), Fungi (kingdom), Opisthokonta (no rank), Eukaryota (superkingdom), cellular organisms (no rank)
A0A1R3RSU1_ASPC5	ASPCADRAFT_129219	A0A1L9RCS2	7.8e-14	no	SHIPACVECRARKAKCSKERPCYHCRSINQPCVYPPKPTRTPLT	Fungal_trans domain-containing protein	Aspergillus carbonarius (strain ITEM 5010)	Pathogen	Aspergillus carbonarius (species), Aspergillus (genus), Aspergillaceae (family), Eurotiales (order), Eurotiomycetidae (subclass), Eurotiomycetes (class), leotiomyceta (no rank), Pezizomycotina (subphylum), saccharomyceta (no rank), Ascomycota (phylum), Dikarya (subkingdom), Fungi (kingdom), Opisthokonta (no rank), Eukaryota (superkingdom), cellular organisms (no rank)
A0A1R3RIC0_ASPC5	ASPCADRAFT_131769	A0A0F9ZZA4	1.8e-15	no	RIAVACHRCHSRKVKCNAQNGVSCSGCLASNTPCVLIDSQRGrYIR	Fungal_trans domain-containing protein	Aspergillus carbonarius (strain ITEM 5010)	Pathogen	Aspergillus carbonarius (species), Aspergillus (genus), Aspergillaceae (family), Eurotiales (order), Eurotiomycetidae (subclass), Eurotiomycetes (class), leotiomyceta (no rank), Pezizomycotina (subphylum), saccharomyceta (no rank), Ascomycota (phylum), Dikarya (subkingdom), Fungi (kingdom), Opisthokonta (no rank), Eukaryota (superkingdom), cellular organisms (no rank)
A0A1R3S193_ASPC5	ASPCADRAFT_136323	A0A1L9U8D1	3.4e-15	no	PRLSLSCIVCRRRKVRCGREQPECANCVRMKETCVYKTMIRDDST	Fungal_trans domain-containing protein	Aspergillus carbonarius (strain ITEM 5010)	Pathogen	Aspergillus carbonarius (species), Aspergillus (genus), Aspergillaceae (family), Eurotiales (order), Eurotiomycetidae (subclass), Eurotiomycetes (class), leotiomyceta (no rank), Pezizomycotina (subphylum), saccharomyceta (no rank), Ascomycota (phylum), Dikarya (subkingdom), Fungi (kingdom), Opisthokonta (no rank), Eukaryota (superkingdom), cellular organisms (no rank)
A0A1R3R8E2_ASPC5	ASPCADRAFT_14063	A0A117DXS4	8.8e-13	no	GVLSSCEPCRKSKIRCDHTVPCGRCRRRRKPALCVYQPAPMSKHPN	Fungal_trans domain-containing protein	Aspergillus carbonarius (strain ITEM 5010)	Pathogen	Aspergillus carbonarius (species), Aspergillus (genus), Aspergillaceae (family), Eurotiales (order), Eurotiomycetidae (subclass), Eurotiomycetes (class), leotiomyceta (no rank), Pezizomycotina (subphylum), saccharomyceta (no rank), Ascomycota (phylum), Dikarya (subkingdom), Fungi (kingdom), Opisthokonta (no rank), Eukaryota (superkingdom), cellular organisms (no rank)
A0A1R3RHF7_ASPC5	ASPCADRAFT_14379	A0A1L9N5U6	1.7e-15	no	RRTARACDSCHRRKIQCDSSIPCNWCRHHNLECTFDRPIGGKRK	Fungal_trans domain-containing protein	Aspergillus carbonarius (strain ITEM 5010)	Pathogen	Aspergillus carbonarius (species), Aspergillus (genus), Aspergillaceae (family), Eurotiales (order), Eurotiomycetidae (subclass), Eurotiomycetes (class), leotiomyceta (no rank), Pezizomycotina (subphylum), saccharomyceta (no rank), Ascomycota (phylum), Dikarya (subkingdom), Fungi (kingdom), Opisthokonta (no rank), Eukaryota (superkingdom), cellular organisms (no rank)
A0A1R3RQX4_ASPC5	ASPCADRAFT_145697	A0A1L9UKX6	1.6e-09	no	SCDPCRKRRCKCVRRAGSYKDCVSCQRSGIPCVSN	Fungal_trans domain-containing protein	Aspergillus carbonarius (strain ITEM 5010)	Pathogen	Aspergillus carbonarius (species), Aspergillus (genus), Aspergillaceae (family), Eurotiales (order), Eurotiomycetidae (subclass), Eurotiomycetes (class), leotiomyceta (no rank), Pezizomycotina (subphylum), saccharomyceta (no rank), Ascomycota (phylum), Dikarya (subkingdom), Fungi (kingdom), Opisthokonta (no rank), Eukaryota (superkingdom), cellular organisms (no rank)
A0A1R3RBT8_ASPC5	ASPCADRAFT_154243	A0A1L9NGM1	1.1e-14	no	RNRAACRRCQRRKIRCDGNEPSCSSCLKAGAHCISDGRQEVPRKY	Fungal_trans domain-containing protein	Aspergillus carbonarius (strain ITEM 5010)	Pathogen	Aspergillus carbonarius (species), Aspergillus (genus), Aspergillaceae (family), Eurotiales (order), Eurotiomycetidae (subclass), Eurotiomycetes (class), leotiomyceta (no rank), Pezizomycotina (subphylum), saccharomyceta (no rank), Ascomycota (phylum), Dikarya (subkingdom), Fungi (kingdom), Opisthokonta (no rank), Eukaryota (superkingdom), cellular organisms (no rank)
A0A1R3S0N0_ASPC5	ASPCADRAFT_158155	A0A1L9WLZ7	8.7e-12	no	LACRRCRIRKQKCSQPRPCTNCVQADAaCVPSQRPARQSHV	Fungal_trans domain-containing protein	Aspergillus carbonarius (strain ITEM 5010)	Pathogen	Aspergillus carbonarius (species), Aspergillus (genus), Aspergillaceae (family), Eurotiales (order), Eurotiomycetidae (subclass), Eurotiomycetes (class), leotiomyceta (no rank), Pezizomycotina (subphylum), saccharomyceta (no rank), Ascomycota (phylum), Dikarya (subkingdom), Fungi (kingdom), Opisthokonta (no rank), Eukaryota (superkingdom), cellular organisms (no rank)
A0A1R3RJK7_ASPC5	ASPCADRAFT_170787	A0A0L1JAG6	7.9e-13	no	RRFALACEECRRRKIRCDQESPCAYCSRFRRVCQY	Fungal_trans domain-containing protein	Aspergillus carbonarius (strain ITEM 5010)	Pathogen	Aspergillus carbonarius (species), Aspergillus (genus), Aspergillaceae (family), Eurotiales (order), Eurotiomycetidae (subclass), Eurotiomycetes (class), leotiomyceta (no rank), Pezizomycotina (subphylum), saccharomyceta (no rank), Ascomycota (phylum), Dikarya (subkingdom), Fungi (kingdom), Opisthokonta (no rank), Eukaryota (superkingdom), cellular organisms (no rank)
A0A1R3RBX8_ASPC5	ASPCADRAFT_176582	A0A1L9V562	2.2e-14	no	RKPISCSRCQAKKIRCNRLAPQCDKCEAVGAECTYLPRKQRSVKS	Fungal_trans domain-containing protein	Aspergillus carbonarius (strain ITEM 5010)	Pathogen	Aspergillus carbonarius (species), Aspergillus (genus), Aspergillaceae (family), Eurotiales (order), Eurotiomycetidae (subclass), Eurotiomycetes (class), leotiomyceta (no rank), Pezizomycotina (subphylum), saccharomyceta (no rank), Ascomycota (phylum), Dikarya (subkingdom), Fungi (kingdom), Opisthokonta (no rank), Eukaryota (superkingdom), cellular organisms (no rank)
A0A1R3RAH1_ASPC5	ASPCADRAFT_176633	A0A100IU48	3.5e-15	no	HVTTACIPCRDGKVKCGGGTPTCRNCAIRGKTCRYRQGDDKRKVP	Fungal_trans domain-containing protein	Aspergillus carbonarius (strain ITEM 5010)	Pathogen	Aspergillus carbonarius (species), Aspergillus (genus), Aspergillaceae (family), Eurotiales (order), Eurotiomycetidae (subclass), Eurotiomycetes (class), leotiomyceta (no rank), Pezizomycotina (subphylum), saccharomyceta (no rank), Ascomycota (phylum), Dikarya (subkingdom), Fungi (kingdom), Opisthokonta (no rank), Eukaryota (superkingdom), cellular organisms (no rank)
A0A1R3R7D8_ASPC5	ASPCADRAFT_17668	A0A1L9V2J5	5.2e-11	no	RRRKACNACVEARSFCDGEYPCEGCLQKGFDCSFSHMQERSSAS	Fungal_trans domain-containing protein	Aspergillus carbonarius (strain ITEM 5010)	Pathogen	Aspergillus carbonarius (species), Aspergillus (genus), Aspergillaceae (family), Eurotiales (order), Eurotiomycetidae (subclass), Eurotiomycetes (class), leotiomyceta (no rank), Pezizomycotina (subphylum), saccharomyceta (no rank), Ascomycota (phylum), Dikarya (subkingdom), Fungi (kingdom), Opisthokonta (no rank), Eukaryota (superkingdom), cellular organisms (no rank)
A0A1R3R784_ASPC5	ASPCADRAFT_179189	A0A017SC93	2.5e-13	no	RVSSACERCRLHKSRCDPYWPCSLCVRANVDCRPVAQPRRRSLR	Fungal_trans domain-containing protein	Aspergillus carbonarius (strain ITEM 5010)	Pathogen	Aspergillus carbonarius (species), Aspergillus (genus), Aspergillaceae (family), Eurotiales (order), Eurotiomycetidae (subclass), Eurotiomycetes (class), leotiomyceta (no rank), Pezizomycotina (subphylum), saccharomyceta (no rank), Ascomycota (phylum), Dikarya (subkingdom), Fungi (kingdom), Opisthokonta (no rank), Eukaryota (superkingdom), cellular organisms (no rank)
A0A1R3S0Q8_ASPC5	ASPCADRAFT_202199	A2QL88	7.6e-13	no	GQLSSCEPCRKSKLRCDHSAPVCNRCVRRGRSDLCIYHPAPLTKPRD	Fungal_trans domain-containing protein	Aspergillus carbonarius (strain ITEM 5010)	Pathogen	Aspergillus carbonarius (species), Aspergillus (genus), Aspergillaceae (family), Eurotiales (order), Eurotiomycetidae (subclass), Eurotiomycetes (class), leotiomyceta (no rank), Pezizomycotina (subphylum), saccharomyceta (no rank), Ascomycota (phylum), Dikarya (subkingdom), Fungi (kingdom), Opisthokonta (no rank), Eukaryota (superkingdom), cellular organisms (no rank)
A0A1R3RXU0_ASPC5	ASPCADRAFT_204908	A1CCM9	1.3e-13	no	NGQLSSCEPCRKGKLRCDHRLPTCDRCAHRGQVSLCIYHPAPMTR	Fungal_trans domain-containing protein	Aspergillus carbonarius (strain ITEM 5010)	Pathogen	Aspergillus carbonarius (species), Aspergillus (genus), Aspergillaceae (family), Eurotiales (order), Eurotiomycetidae (subclass), Eurotiomycetes (class), leotiomyceta (no rank), Pezizomycotina (subphylum), saccharomyceta (no rank), Ascomycota (phylum), Dikarya (subkingdom), Fungi (kingdom), Opisthokonta (no rank), Eukaryota (superkingdom), cellular organisms (no rank)
A0A1R3RUP7_ASPC5	ASPCADRAFT_205449	A0A124BW41	1.2e-15	no	RTANaCVACRQSKIKCSGNEPCANCQRRTLPCRFVEESRKVLIS	Fungal_trans domain-containing protein	Aspergillus carbonarius (strain ITEM 5010)	Pathogen	Aspergillus carbonarius (species), Aspergillus (genus), Aspergillaceae (family), Eurotiales (order), Eurotiomycetidae (subclass), Eurotiomycetes (class), leotiomyceta (no rank), Pezizomycotina (subphylum), saccharomyceta (no rank), Ascomycota (phylum), Dikarya (subkingdom), Fungi (kingdom), Opisthokonta (no rank), Eukaryota (superkingdom), cellular organisms (no rank)
A0A1R3RMS3_ASPC5	ASPCADRAFT_207142	G3XSX2	1.1e-11	no	KRTEHSCDRCKSRKQKCHRVPGEDRCQHCERYDYDCTTTKPRKQRLY	Fungal_trans domain-containing protein	Aspergillus carbonarius (strain ITEM 5010)	Pathogen	Aspergillus carbonarius (species), Aspergillus (genus), Aspergillaceae (family), Eurotiales (order), Eurotiomycetidae (subclass), Eurotiomycetes (class), leotiomyceta (no rank), Pezizomycotina (subphylum), saccharomyceta (no rank), Ascomycota (phylum), Dikarya (subkingdom), Fungi (kingdom), Opisthokonta (no rank), Eukaryota (superkingdom), cellular organisms (no rank)
A0A1R3RKI0_ASPC5	ASPCADRAFT_208620	A0A100IFP7	3.4e-11	no	RLSISCDSCrQSKVKCIHDGHPPCRRCHRLHRDGCVLTDPRSPVART	Fungal_trans domain-containing protein	Aspergillus carbonarius (strain ITEM 5010)	Pathogen	Aspergillus carbonarius (species), Aspergillus (genus), Aspergillaceae (family), Eurotiales (order), Eurotiomycetidae (subclass), Eurotiomycetes (class), leotiomyceta (no rank), Pezizomycotina (subphylum), saccharomyceta (no rank), Ascomycota (phylum), Dikarya (subkingdom), Fungi (kingdom), Opisthokonta (no rank), Eukaryota (superkingdom), cellular organisms (no rank)
A0A1R3REK5_ASPC5	ASPCADRAFT_210146	G3Y7W6	2e-14	no	RVSRACDRCRSKKDKCDGLRPACSACQASGQTCSYDPHAKKRGLP	Fungal_trans domain-containing protein	Aspergillus carbonarius (strain ITEM 5010)	Pathogen	Aspergillus carbonarius (species), Aspergillus (genus), Aspergillaceae (family), Eurotiales (order), Eurotiomycetidae (subclass), Eurotiomycetes (class), leotiomyceta (no rank), Pezizomycotina (subphylum), saccharomyceta (no rank), Ascomycota (phylum), Dikarya (subkingdom), Fungi (kingdom), Opisthokonta (no rank), Eukaryota (superkingdom), cellular organisms (no rank)
A0A1R3R9D6_ASPC5	ASPCADRAFT_211371	A0A1L9MSH4	1.1e-16	no	IAKRACDQCKFRKIKCSLSQPCRACVSMGFDCTFYQPQKKRGPT	Fungal_trans domain-containing protein	Aspergillus carbonarius (strain ITEM 5010)	Pathogen	Aspergillus carbonarius (species), Aspergillus (genus), Aspergillaceae (family), Eurotiales (order), Eurotiomycetidae (subclass), Eurotiomycetes (class), leotiomyceta (no rank), Pezizomycotina (subphylum), saccharomyceta (no rank), Ascomycota (phylum), Dikarya (subkingdom), Fungi (kingdom), Opisthokonta (no rank), Eukaryota (superkingdom), cellular organisms (no rank)
A0A1R3RF09_ASPC5	ASPCADRAFT_33782	C7ZGG2	7.8e-15	no	RISTACTRCQKRKIRCDALSPACSACKRAGVSCIGGGALRdYVAN	Fungal_trans domain-containing protein	Aspergillus carbonarius (strain ITEM 5010)	Pathogen	Aspergillus carbonarius (species), Aspergillus (genus), Aspergillaceae (family), Eurotiales (order), Eurotiomycetidae (subclass), Eurotiomycetes (class), leotiomyceta (no rank), Pezizomycotina (subphylum), saccharomyceta (no rank), Ascomycota (phylum), Dikarya (subkingdom), Fungi (kingdom), Opisthokonta (no rank), Eukaryota (superkingdom), cellular organisms (no rank)
A0A1R3S1M0_ASPC5	ASPCADRAFT_37834	A0A0F8V5R5	4.6e-14	no	LARFACDFCRQKKLkCSRELPKCSTCKPWPGICDYSRDRPSLNRV	Fungal_trans domain-containing protein	Aspergillus carbonarius (strain ITEM 5010)	Pathogen	Aspergillus carbonarius (species), Aspergillus (genus), Aspergillaceae (family), Eurotiales (order), Eurotiomycetidae (subclass), Eurotiomycetes (class), leotiomyceta (no rank), Pezizomycotina (subphylum), saccharomyceta (no rank), Ascomycota (phylum), Dikarya (subkingdom), Fungi (kingdom), Opisthokonta (no rank), Eukaryota (superkingdom), cellular organisms (no rank)
A0A1R3S210_ASPC5	ASPCADRAFT_392817	A0A0K8LDB7	5.5e-14	no	RHATSCLLCRKRKIRCNREQPCSNCLRARGGSCIYEGPNQPVPHQ	Fungal_trans domain-containing protein	Aspergillus carbonarius (strain ITEM 5010)	Pathogen	Aspergillus carbonarius (species), Aspergillus (genus), Aspergillaceae (family), Eurotiales (order), Eurotiomycetidae (subclass), Eurotiomycetes (class), leotiomyceta (no rank), Pezizomycotina (subphylum), saccharomyceta (no rank), Ascomycota (phylum), Dikarya (subkingdom), Fungi (kingdom), Opisthokonta (no rank), Eukaryota (superkingdom), cellular organisms (no rank)
A0A1R3S092_ASPC5	ASPCADRAFT_393841	A0A1L9N958	2e-14	no	RASRACETCRVRKTKCDQAQPCSYCAyHSLDCFYRAAGPNESSS	Fungal_trans domain-containing protein	Aspergillus carbonarius (strain ITEM 5010)	Pathogen	Aspergillus carbonarius (species), Aspergillus (genus), Aspergillaceae (family), Eurotiales (order), Eurotiomycetidae (subclass), Eurotiomycetes (class), leotiomyceta (no rank), Pezizomycotina (subphylum), saccharomyceta (no rank), Ascomycota (phylum), Dikarya (subkingdom), Fungi (kingdom), Opisthokonta (no rank), Eukaryota (superkingdom), cellular organisms (no rank)
A0A1R3RQM7_ASPC5	ASPCADRAFT_396311	A0A1L9UKJ3	1.8e-12	no	RPLLACLACRSSKVRCELPRGSSVCRRCDGRGLKCVFIKARrTLRRP	Fungal_trans domain-containing protein	Aspergillus carbonarius (strain ITEM 5010)	Pathogen	Aspergillus carbonarius (species), Aspergillus (genus), Aspergillaceae (family), Eurotiales (order), Eurotiomycetidae (subclass), Eurotiomycetes (class), leotiomyceta (no rank), Pezizomycotina (subphylum), saccharomyceta (no rank), Ascomycota (phylum), Dikarya (subkingdom), Fungi (kingdom), Opisthokonta (no rank), Eukaryota (superkingdom), cellular organisms (no rank)
A0A1R3RGX0_ASPC5	ASPCADRAFT_398186	A0A1L9U4X3	9.4e-14	no	PLTVsCELCKQRKVKCdRAQPSCGWCARNGQLCEYKERKKPGLRA	Fungal_trans domain-containing protein	Aspergillus carbonarius (strain ITEM 5010)	Pathogen	Aspergillus carbonarius (species), Aspergillus (genus), Aspergillaceae (family), Eurotiales (order), Eurotiomycetidae (subclass), Eurotiomycetes (class), leotiomyceta (no rank), Pezizomycotina (subphylum), saccharomyceta (no rank), Ascomycota (phylum), Dikarya (subkingdom), Fungi (kingdom), Opisthokonta (no rank), Eukaryota (superkingdom), cellular organisms (no rank)
A0A1R3RBD1_ASPC5	ASPCADRAFT_399689	A0A1L9UF89	1.1e-09	no	LHKACDACRARKTRCELSGSSDACEFCLSQSRPCSFTP	Fungal_trans domain-containing protein	Aspergillus carbonarius (strain ITEM 5010)	Pathogen	Aspergillus carbonarius (species), Aspergillus (genus), Aspergillaceae (family), Eurotiales (order), Eurotiomycetidae (subclass), Eurotiomycetes (class), leotiomyceta (no rank), Pezizomycotina (subphylum), saccharomyceta (no rank), Ascomycota (phylum), Dikarya (subkingdom), Fungi (kingdom), Opisthokonta (no rank), Eukaryota (superkingdom), cellular organisms (no rank)
A0A1R3RWW8_ASPC5	ASPCADRAFT_403271	A0A1L9RM51	6.3e-14	no	TRSKAcTECKTQKTKCETKPGETSCTRCLRHGLECVSYDVSQQFLQS	Fungal_trans domain-containing protein	Aspergillus carbonarius (strain ITEM 5010)	Pathogen	Aspergillus carbonarius (species), Aspergillus (genus), Aspergillaceae (family), Eurotiales (order), Eurotiomycetidae (subclass), Eurotiomycetes (class), leotiomyceta (no rank), Pezizomycotina (subphylum), saccharomyceta (no rank), Ascomycota (phylum), Dikarya (subkingdom), Fungi (kingdom), Opisthokonta (no rank), Eukaryota (superkingdom), cellular organisms (no rank)
A0A1R3S2H6_ASPC5	ASPCADRAFT_503183	A0A1M3TNK4	5e-09	no	NSPRTPCCVCRAKRRACDRAVPVCGRCKSLNQHGQCSYRPEDMPP	Fungal_trans domain-containing protein	Aspergillus carbonarius (strain ITEM 5010)	Pathogen	Aspergillus carbonarius (species), Aspergillus (genus), Aspergillaceae (family), Eurotiales (order), Eurotiomycetidae (subclass), Eurotiomycetes (class), leotiomyceta (no rank), Pezizomycotina (subphylum), saccharomyceta (no rank), Ascomycota (phylum), Dikarya (subkingdom), Fungi (kingdom), Opisthokonta (no rank), Eukaryota (superkingdom), cellular organisms (no rank)
A0A1R3RDM4_ASPC5	ASPCADRAFT_509512	A0A1L9SB26	2.6e-14	no	QPALACSSCRSRKQKCDKAWPTCSRCQrLLLKCHYPSPPLSDSMD	Fungal_trans domain-containing protein	Aspergillus carbonarius (strain ITEM 5010)	Pathogen	Aspergillus carbonarius (species), Aspergillus (genus), Aspergillaceae (family), Eurotiales (order), Eurotiomycetidae (subclass), Eurotiomycetes (class), leotiomyceta (no rank), Pezizomycotina (subphylum), saccharomyceta (no rank), Ascomycota (phylum), Dikarya (subkingdom), Fungi (kingdom), Opisthokonta (no rank), Eukaryota (superkingdom), cellular organisms (no rank)
A0A1R3RBD8_ASPC5	ASPCADRAFT_509779	A0A1L9RSF9	3.2e-12	no	RSAAACLFCREKKLRCDSVQPTCGNCSAKGRVCQQAIRQPKQrPT	Fungal_trans domain-containing protein	Aspergillus carbonarius (strain ITEM 5010)	Pathogen	Aspergillus carbonarius (species), Aspergillus (genus), Aspergillaceae (family), Eurotiales (order), Eurotiomycetidae (subclass), Eurotiomycetes (class), leotiomyceta (no rank), Pezizomycotina (subphylum), saccharomyceta (no rank), Ascomycota (phylum), Dikarya (subkingdom), Fungi (kingdom), Opisthokonta (no rank), Eukaryota (superkingdom), cellular organisms (no rank)
A0A1R3R7T1_ASPC5	ASPCADRAFT_510799	A0A1T3CHV5	1.2e-14	no	KPLLSCTFCRSRkVRCDRQLPCKTCTSRGIGFSCTYRSDVARKN	Fungal_trans domain-containing protein	Aspergillus carbonarius (strain ITEM 5010)	Pathogen	Aspergillus carbonarius (species), Aspergillus (genus), Aspergillaceae (family), Eurotiales (order), Eurotiomycetidae (subclass), Eurotiomycetes (class), leotiomyceta (no rank), Pezizomycotina (subphylum), saccharomyceta (no rank), Ascomycota (phylum), Dikarya (subkingdom), Fungi (kingdom), Opisthokonta (no rank), Eukaryota (superkingdom), cellular organisms (no rank)
A0A1R3RX07_ASPC5	ASPCADRAFT_513126	A0A1L9RY37	1.9e-15	no	RACTRCHSLKVRCSGHAPACVRCQKRGKECIYQGSNTSVGRP	Fungal_trans domain-containing protein	Aspergillus carbonarius (strain ITEM 5010)	Pathogen	Aspergillus carbonarius (species), Aspergillus (genus), Aspergillaceae (family), Eurotiales (order), Eurotiomycetidae (subclass), Eurotiomycetes (class), leotiomyceta (no rank), Pezizomycotina (subphylum), saccharomyceta (no rank), Ascomycota (phylum), Dikarya (subkingdom), Fungi (kingdom), Opisthokonta (no rank), Eukaryota (superkingdom), cellular organisms (no rank)
A0A1R3RXQ2_ASPC5	ASPCADRAFT_513323	A0A094I0R6	2.7e-12	no	IVACDQCHGHKLKCSPQSQGCARCNRLGIRCTSSRPIKKRGRK	Fungal_trans domain-containing protein	Aspergillus carbonarius (strain ITEM 5010)	Pathogen	Aspergillus carbonarius (species), Aspergillus (genus), Aspergillaceae (family), Eurotiales (order), Eurotiomycetidae (subclass), Eurotiomycetes (class), leotiomyceta (no rank), Pezizomycotina (subphylum), saccharomyceta (no rank), Ascomycota (phylum), Dikarya (subkingdom), Fungi (kingdom), Opisthokonta (no rank), Eukaryota (superkingdom), cellular organisms (no rank)
A0A1R3RC02_ASPC5	ASPCADRAFT_518317	A0A0F7TRF9	6.5e-16	no	MTLRVCDSCIrKKVKcDLGRPSCSSCMERGFTCTYTSQRRRPGPP	Fungal_trans domain-containing protein	Aspergillus carbonarius (strain ITEM 5010)	Pathogen	Aspergillus carbonarius (species), Aspergillus (genus), Aspergillaceae (family), Eurotiales (order), Eurotiomycetidae (subclass), Eurotiomycetes (class), leotiomyceta (no rank), Pezizomycotina (subphylum), saccharomyceta (no rank), Ascomycota (phylum), Dikarya (subkingdom), Fungi (kingdom), Opisthokonta (no rank), Eukaryota (superkingdom), cellular organisms (no rank)
A0A1R3RFA6_ASPC5	ASPCADRAFT_53835	A0A1M3TD73	3.8e-14	no	FRARACENCRLRKIKCDKVIPCSSCSVLGIACGPTGTPGGPGPSRR	Fungal_trans domain-containing protein	Aspergillus carbonarius (strain ITEM 5010)	Pathogen	Aspergillus carbonarius (species), Aspergillus (genus), Aspergillaceae (family), Eurotiales (order), Eurotiomycetidae (subclass), Eurotiomycetes (class), leotiomyceta (no rank), Pezizomycotina (subphylum), saccharomyceta (no rank), Ascomycota (phylum), Dikarya (subkingdom), Fungi (kingdom), Opisthokonta (no rank), Eukaryota (superkingdom), cellular organisms (no rank)
A0A1R3S2K3_ASPC5	ASPCADRAFT_699	A0A1L9UQC4	4.8e-10	no	RLATACTECQRRKQKCSREWPCNHCQSRRIAHLCKFTPKKVLKAKP	Fungal_trans domain-containing protein	Aspergillus carbonarius (strain ITEM 5010)	Pathogen	Aspergillus carbonarius (species), Aspergillus (genus), Aspergillaceae (family), Eurotiales (order), Eurotiomycetidae (subclass), Eurotiomycetes (class), leotiomyceta (no rank), Pezizomycotina (subphylum), saccharomyceta (no rank), Ascomycota (phylum), Dikarya (subkingdom), Fungi (kingdom), Opisthokonta (no rank), Eukaryota (superkingdom), cellular organisms (no rank)
A0A1R3RBX3_ASPC5	ASPCADRAFT_9378	A0A1L9TZ18	1.9e-13	no	EILPACDLCHSRKVKCDRRSNCANCRDVGVECRRLRAGRLSRKR	Fungal_trans domain-containing protein	Aspergillus carbonarius (strain ITEM 5010)	Pathogen	Aspergillus carbonarius (species), Aspergillus (genus), Aspergillaceae (family), Eurotiales (order), Eurotiomycetidae (subclass), Eurotiomycetes (class), leotiomyceta (no rank), Pezizomycotina (subphylum), saccharomyceta (no rank), Ascomycota (phylum), Dikarya (subkingdom), Fungi (kingdom), Opisthokonta (no rank), Eukaryota (superkingdom), cellular organisms (no rank)
A1C5I1_ASPCL	ACLA_003620	A0A1L9RHQ2	3.8e-07	no	RRMRCEDCRRRSSSCSALAPCTGCASLDRPDVTEDRMGDVAEV	Fungal_trans domain-containing protein	Aspergillus clavatus (strain ATCC 1007 / CBS 513.65 / DSM 816 / NCTC 3887 / NRRL 1 / QM 1276 / 107)	Pathogen	Aspergillus clavatus (species), Aspergillus subgen. Fumigati (subgenus), Aspergillus (genus), Aspergillaceae (family), Eurotiales (order), Eurotiomycetidae (subclass), Eurotiomycetes (class), leotiomyceta (no rank), Pezizomycotina (subphylum), saccharomyceta (no rank), Ascomycota (phylum), Dikarya (subkingdom), Fungi (kingdom), Opisthokonta (no rank), Eukaryota (superkingdom), cellular organisms …
A1C5L8_ASPCL	ACLA_003990	A0A0K8LA56	8.4e-15	no	RSSRACTACRAKHVRCDAVLPKCTRCLKEDKQCVYLKSRRGGRRR	Fungal specific transcription factor domain protein	Aspergillus clavatus (strain ATCC 1007 / CBS 513.65 / DSM 816 / NCTC 3887 / NRRL 1 / QM 1276 / 107)	Pathogen	Aspergillus clavatus (species), Aspergillus subgen. Fumigati (subgenus), Aspergillus (genus), Aspergillaceae (family), Eurotiales (order), Eurotiomycetidae (subclass), Eurotiomycetes (class), leotiomyceta (no rank), Pezizomycotina (subphylum), saccharomyceta (no rank), Ascomycota (phylum), Dikarya (subkingdom), Fungi (kingdom), Opisthokonta (no rank), Eukaryota (superkingdom), cellular organisms …
A1C5M9_ASPCL	ACLA_004110	A0A1L9UPU5	7.9e-11	no	ACEACRKLKMRCIRSDSMEPCDRCLRNNRTCRIP	Fungal_trans domain-containing protein	Aspergillus clavatus (strain ATCC 1007 / CBS 513.65 / DSM 816 / NCTC 3887 / NRRL 1 / QM 1276 / 107)	Pathogen	Aspergillus clavatus (species), Aspergillus subgen. Fumigati (subgenus), Aspergillus (genus), Aspergillaceae (family), Eurotiales (order), Eurotiomycetidae (subclass), Eurotiomycetes (class), leotiomyceta (no rank), Pezizomycotina (subphylum), saccharomyceta (no rank), Ascomycota (phylum), Dikarya (subkingdom), Fungi (kingdom), Opisthokonta (no rank), Eukaryota (superkingdom), cellular organisms …
A1CDY8_ASPCL	ACLA_008250	A0A1L9R4R3	4.7e-12	no	RAKHACLHCNRRRIRCNVVEMSPCHKCRSMSVPCEVGVSRRGKY	Fungal_trans domain-containing protein	Aspergillus clavatus (strain ATCC 1007 / CBS 513.65 / DSM 816 / NCTC 3887 / NRRL 1 / QM 1276 / 107)	Pathogen	Aspergillus clavatus (species), Aspergillus subgen. Fumigati (subgenus), Aspergillus (genus), Aspergillaceae (family), Eurotiales (order), Eurotiomycetidae (subclass), Eurotiomycetes (class), leotiomyceta (no rank), Pezizomycotina (subphylum), saccharomyceta (no rank), Ascomycota (phylum), Dikarya (subkingdom), Fungi (kingdom), Opisthokonta (no rank), Eukaryota (superkingdom), cellular organisms …
A1CDZ0_ASPCL	ACLA_008270	A1DD00	3.6e-12	no	RLSVSCDGCrRAKVKCIHEGQSPCRRCQRTNLSDCVLTDTYSSPARKSRRA	Fungal specific transcription factor domain protein	Aspergillus clavatus (strain ATCC 1007 / CBS 513.65 / DSM 816 / NCTC 3887 / NRRL 1 / QM 1276 / 107)	Pathogen	Aspergillus clavatus (species), Aspergillus subgen. Fumigati (subgenus), Aspergillus (genus), Aspergillaceae (family), Eurotiales (order), Eurotiomycetidae (subclass), Eurotiomycetes (class), leotiomyceta (no rank), Pezizomycotina (subphylum), saccharomyceta (no rank), Ascomycota (phylum), Dikarya (subkingdom), Fungi (kingdom), Opisthokonta (no rank), Eukaryota (superkingdom), cellular organisms …
A1CAW4_ASPCL	ACLA_013170	A1DEI8	1e-15	no	PAVIRACIVCHKRKVKCDLEKQQPCTNCIRWEVECMPWSRKRKRITN	Fungal specific transcription factor domain protein	Aspergillus clavatus (strain ATCC 1007 / CBS 513.65 / DSM 816 / NCTC 3887 / NRRL 1 / QM 1276 / 107)	Pathogen	Aspergillus clavatus (species), Aspergillus subgen. Fumigati (subgenus), Aspergillus (genus), Aspergillaceae (family), Eurotiales (order), Eurotiomycetidae (subclass), Eurotiomycetes (class), leotiomyceta (no rank), Pezizomycotina (subphylum), saccharomyceta (no rank), Ascomycota (phylum), Dikarya (subkingdom), Fungi (kingdom), Opisthokonta (no rank), Eukaryota (superkingdom), cellular organisms …
A1CB36_ASPCL	ACLA_013910	A1DKT1	3e-14	no	RPPKSCDPCRRRKVRCDREFPCGPCERARTSLQCFYRPAVAARSPS	Fungal_trans domain-containing protein	Aspergillus clavatus (strain ATCC 1007 / CBS 513.65 / DSM 816 / NCTC 3887 / NRRL 1 / QM 1276 / 107)	Pathogen	Aspergillus clavatus (species), Aspergillus subgen. Fumigati (subgenus), Aspergillus (genus), Aspergillaceae (family), Eurotiales (order), Eurotiomycetidae (subclass), Eurotiomycetes (class), leotiomyceta (no rank), Pezizomycotina (subphylum), saccharomyceta (no rank), Ascomycota (phylum), Dikarya (subkingdom), Fungi (kingdom), Opisthokonta (no rank), Eukaryota (superkingdom), cellular organisms …
A1CC11_ASPCL	ACLA_017260	A0A0J5Q1U9	3.8e-16	no	FRARACDNCRQRKIKCDKAIPCSSCGALGIPCRANGVTVSTPEH	C6 transcription factor, putative	Aspergillus clavatus (strain ATCC 1007 / CBS 513.65 / DSM 816 / NCTC 3887 / NRRL 1 / QM 1276 / 107)	Pathogen	Aspergillus clavatus (species), Aspergillus subgen. Fumigati (subgenus), Aspergillus (genus), Aspergillaceae (family), Eurotiales (order), Eurotiomycetidae (subclass), Eurotiomycetes (class), leotiomyceta (no rank), Pezizomycotina (subphylum), saccharomyceta (no rank), Ascomycota (phylum), Dikarya (subkingdom), Fungi (kingdom), Opisthokonta (no rank), Eukaryota (superkingdom), cellular organisms …
A1CNK8_ASPCL	ACLA_019340	I8U8C6	3e-16	no	KSAFSCEACRKRKVKCNGASPSCSRCAARGEVCVYSlAPTLSYTK	C6 transcription factor, putative	Aspergillus clavatus (strain ATCC 1007 / CBS 513.65 / DSM 816 / NCTC 3887 / NRRL 1 / QM 1276 / 107)	Pathogen	Aspergillus clavatus (species), Aspergillus subgen. Fumigati (subgenus), Aspergillus (genus), Aspergillaceae (family), Eurotiales (order), Eurotiomycetidae (subclass), Eurotiomycetes (class), leotiomyceta (no rank), Pezizomycotina (subphylum), saccharomyceta (no rank), Ascomycota (phylum), Dikarya (subkingdom), Fungi (kingdom), Opisthokonta (no rank), Eukaryota (superkingdom), cellular organisms …
A1CNS0_ASPCL	ACLA_019960	A1D1N2	2.2e-13	no	GLYRCRTCRKRKIRCSGEQPVCKTCSEYNHVCLGYNDPLTHVR	C6 transcription factor, putative	Aspergillus clavatus (strain ATCC 1007 / CBS 513.65 / DSM 816 / NCTC 3887 / NRRL 1 / QM 1276 / 107)	Pathogen	Aspergillus clavatus (species), Aspergillus subgen. Fumigati (subgenus), Aspergillus (genus), Aspergillaceae (family), Eurotiales (order), Eurotiomycetidae (subclass), Eurotiomycetes (class), leotiomyceta (no rank), Pezizomycotina (subphylum), saccharomyceta (no rank), Ascomycota (phylum), Dikarya (subkingdom), Fungi (kingdom), Opisthokonta (no rank), Eukaryota (superkingdom), cellular organisms …
A1CP44_ASPCL	ACLA_021240	A0A1L9TL01	1.1e-13	no	RPLLSCLLCRQRkLRCDRQQPCGTCTSKGLGSTCAYMSKPIDNPQR	Fungal specific transcription factor domain protein	Aspergillus clavatus (strain ATCC 1007 / CBS 513.65 / DSM 816 / NCTC 3887 / NRRL 1 / QM 1276 / 107)	Pathogen	Aspergillus clavatus (species), Aspergillus subgen. Fumigati (subgenus), Aspergillus (genus), Aspergillaceae (family), Eurotiales (order), Eurotiomycetidae (subclass), Eurotiomycetes (class), leotiomyceta (no rank), Pezizomycotina (subphylum), saccharomyceta (no rank), Ascomycota (phylum), Dikarya (subkingdom), Fungi (kingdom), Opisthokonta (no rank), Eukaryota (superkingdom), cellular organisms …
A1CPQ4_ASPCL	ACLA_023390	A0A084G630	1.2e-15	no	DKPQLSCNSCRRRKVRCDRLHPCSNCSSRGLGSSCVYPTSTASSPA	Fungal specific transcription factor domain protein	Aspergillus clavatus (strain ATCC 1007 / CBS 513.65 / DSM 816 / NCTC 3887 / NRRL 1 / QM 1276 / 107)	Pathogen	Aspergillus clavatus (species), Aspergillus subgen. Fumigati (subgenus), Aspergillus (genus), Aspergillaceae (family), Eurotiales (order), Eurotiomycetidae (subclass), Eurotiomycetes (class), leotiomyceta (no rank), Pezizomycotina (subphylum), saccharomyceta (no rank), Ascomycota (phylum), Dikarya (subkingdom), Fungi (kingdom), Opisthokonta (no rank), Eukaryota (superkingdom), cellular organisms …
A1CPX7_ASPCL	ACLA_024130	A0A1L9RKE6	6.3e-10	no	DRTQPCCVCRLKRRGCDRKRPvCGRCNELGLSEECSYRPEDMP	Fungal specific transcription factor domain protein	Aspergillus clavatus (strain ATCC 1007 / CBS 513.65 / DSM 816 / NCTC 3887 / NRRL 1 / QM 1276 / 107)	Pathogen	Aspergillus clavatus (species), Aspergillus subgen. Fumigati (subgenus), Aspergillus (genus), Aspergillaceae (family), Eurotiales (order), Eurotiomycetidae (subclass), Eurotiomycetes (class), leotiomyceta (no rank), Pezizomycotina (subphylum), saccharomyceta (no rank), Ascomycota (phylum), Dikarya (subkingdom), Fungi (kingdom), Opisthokonta (no rank), Eukaryota (superkingdom), cellular organisms …
A1CJS3_ASPCL	ACLA_036000	Q4WX32	5.6e-09	no	RDGSSCDACLRRRSRCAMNEMVNKCYSCDFHRQDCTFTLSRPNTADL	C6 transcription factor (OTam), putative	Aspergillus clavatus (strain ATCC 1007 / CBS 513.65 / DSM 816 / NCTC 3887 / NRRL 1 / QM 1276 / 107)	Pathogen	Aspergillus clavatus (species), Aspergillus subgen. Fumigati (subgenus), Aspergillus (genus), Aspergillaceae (family), Eurotiales (order), Eurotiomycetidae (subclass), Eurotiomycetes (class), leotiomyceta (no rank), Pezizomycotina (subphylum), saccharomyceta (no rank), Ascomycota (phylum), Dikarya (subkingdom), Fungi (kingdom), Opisthokonta (no rank), Eukaryota (superkingdom), cellular organisms …
A1CKW4_ASPCL	ACLA_040040	Q4WY88	3.6e-12	no	NGTLQSCEPCRKAKLRCDHGRPVCGRCTAKKIASRCFYHPAPMTKR	C6 transcription factor, putative	Aspergillus clavatus (strain ATCC 1007 / CBS 513.65 / DSM 816 / NCTC 3887 / NRRL 1 / QM 1276 / 107)	Pathogen	Aspergillus clavatus (species), Aspergillus subgen. Fumigati (subgenus), Aspergillus (genus), Aspergillaceae (family), Eurotiales (order), Eurotiomycetidae (subclass), Eurotiomycetes (class), leotiomyceta (no rank), Pezizomycotina (subphylum), saccharomyceta (no rank), Ascomycota (phylum), Dikarya (subkingdom), Fungi (kingdom), Opisthokonta (no rank), Eukaryota (superkingdom), cellular organisms …
A1C8S7_ASPCL	ACLA_044340	A0A0G4PB90	2.3e-14	no	QRTRQACGPCRRKKARCPGEKPTCSLCRRLGQRCTYGPHAWRVR	Fungal specific transcription factor domain protein	Aspergillus clavatus (strain ATCC 1007 / CBS 513.65 / DSM 816 / NCTC 3887 / NRRL 1 / QM 1276 / 107)	Pathogen	Aspergillus clavatus (species), Aspergillus subgen. Fumigati (subgenus), Aspergillus (genus), Aspergillaceae (family), Eurotiales (order), Eurotiomycetidae (subclass), Eurotiomycetes (class), leotiomyceta (no rank), Pezizomycotina (subphylum), saccharomyceta (no rank), Ascomycota (phylum), Dikarya (subkingdom), Fungi (kingdom), Opisthokonta (no rank), Eukaryota (superkingdom), cellular organisms …
A1C8V7_ASPCL	ACLA_044640	A0A150VD55	3.3e-12	no	SISPISCELCRQRKCKCDRKLPVCFQCSSNPSKCSYPQSGKR	C6 transcription factor, putative	Aspergillus clavatus (strain ATCC 1007 / CBS 513.65 / DSM 816 / NCTC 3887 / NRRL 1 / QM 1276 / 107)	Pathogen	Aspergillus clavatus (species), Aspergillus subgen. Fumigati (subgenus), Aspergillus (genus), Aspergillaceae (family), Eurotiales (order), Eurotiomycetidae (subclass), Eurotiomycetes (class), leotiomyceta (no rank), Pezizomycotina (subphylum), saccharomyceta (no rank), Ascomycota (phylum), Dikarya (subkingdom), Fungi (kingdom), Opisthokonta (no rank), Eukaryota (superkingdom), cellular organisms …
A1CCK2_ASPCL	ACLA_062220	A1DJT9	3.1e-15	no	QDPVSCESCRRRKLKCNRQKPCGSCVTRKLTCTYASGSDGTQEI	Fungal_trans domain-containing protein	Aspergillus clavatus (strain ATCC 1007 / CBS 513.65 / DSM 816 / NCTC 3887 / NRRL 1 / QM 1276 / 107)	Pathogen	Aspergillus clavatus (species), Aspergillus subgen. Fumigati (subgenus), Aspergillus (genus), Aspergillaceae (family), Eurotiales (order), Eurotiomycetidae (subclass), Eurotiomycetes (class), leotiomyceta (no rank), Pezizomycotina (subphylum), saccharomyceta (no rank), Ascomycota (phylum), Dikarya (subkingdom), Fungi (kingdom), Opisthokonta (no rank), Eukaryota (superkingdom), cellular organisms …
A1CCY7_ASPCL	ACLA_063630	A0A0K8KZ13	1.6e-13	no	QRRRHIAVTACLECRAKKRKCSGTSPCVACVQLGIECLLDAE	Fungal_trans domain-containing protein	Aspergillus clavatus (strain ATCC 1007 / CBS 513.65 / DSM 816 / NCTC 3887 / NRRL 1 / QM 1276 / 107)	Pathogen	Aspergillus clavatus (species), Aspergillus subgen. Fumigati (subgenus), Aspergillus (genus), Aspergillaceae (family), Eurotiales (order), Eurotiomycetidae (subclass), Eurotiomycetes (class), leotiomyceta (no rank), Pezizomycotina (subphylum), saccharomyceta (no rank), Ascomycota (phylum), Dikarya (subkingdom), Fungi (kingdom), Opisthokonta (no rank), Eukaryota (superkingdom), cellular organisms …
A1C692_ASPCL	ACLA_069430	A0A0S7DMJ3	6.6e-13	no	KKNSTACLPCKQAKRKCSGRPAPCTSCRNTNAECVFDETLDLRRK	Fungal specific transcription factor domain protein	Aspergillus clavatus (strain ATCC 1007 / CBS 513.65 / DSM 816 / NCTC 3887 / NRRL 1 / QM 1276 / 107)	Pathogen	Aspergillus clavatus (species), Aspergillus subgen. Fumigati (subgenus), Aspergillus (genus), Aspergillaceae (family), Eurotiales (order), Eurotiomycetidae (subclass), Eurotiomycetes (class), leotiomyceta (no rank), Pezizomycotina (subphylum), saccharomyceta (no rank), Ascomycota (phylum), Dikarya (subkingdom), Fungi (kingdom), Opisthokonta (no rank), Eukaryota (superkingdom), cellular organisms …
A1CSN7_ASPCL	ACLA_080080	A1DGD1	1.1e-13	no	KRVRTSCTRCKTRKQKCDNDYPNCSNCRKAGVSCDKQTVLRRESG	C6 transcription factor, putative	Aspergillus clavatus (strain ATCC 1007 / CBS 513.65 / DSM 816 / NCTC 3887 / NRRL 1 / QM 1276 / 107)	Pathogen	Aspergillus clavatus (species), Aspergillus subgen. Fumigati (subgenus), Aspergillus (genus), Aspergillaceae (family), Eurotiales (order), Eurotiomycetidae (subclass), Eurotiomycetes (class), leotiomyceta (no rank), Pezizomycotina (subphylum), saccharomyceta (no rank), Ascomycota (phylum), Dikarya (subkingdom), Fungi (kingdom), Opisthokonta (no rank), Eukaryota (superkingdom), cellular organisms …
A1CSV6_ASPCL	ACLA_080770	A0A146FSS0	1.1e-15	no	PQLSCELCRRRKVKCDKRNPCTNCASAGVACIPTYRMRLPRG	C6 transcription factor, putative	Aspergillus clavatus (strain ATCC 1007 / CBS 513.65 / DSM 816 / NCTC 3887 / NRRL 1 / QM 1276 / 107)	Pathogen	Aspergillus clavatus (species), Aspergillus subgen. Fumigati (subgenus), Aspergillus (genus), Aspergillaceae (family), Eurotiales (order), Eurotiomycetidae (subclass), Eurotiomycetes (class), leotiomyceta (no rank), Pezizomycotina (subphylum), saccharomyceta (no rank), Ascomycota (phylum), Dikarya (subkingdom), Fungi (kingdom), Opisthokonta (no rank), Eukaryota (superkingdom), cellular organisms …
A1CT71_ASPCL	ACLA_081980	A0A1L9R6B1	4.3e-15	no	VRLSCEACHRRKKKCDKRLPCANCSRAGVPCVPVERPRLPRG	Fungal specific transcription factor domain protein	Aspergillus clavatus (strain ATCC 1007 / CBS 513.65 / DSM 816 / NCTC 3887 / NRRL 1 / QM 1276 / 107)	Pathogen	Aspergillus clavatus (species), Aspergillus subgen. Fumigati (subgenus), Aspergillus (genus), Aspergillaceae (family), Eurotiales (order), Eurotiomycetidae (subclass), Eurotiomycetes (class), leotiomyceta (no rank), Pezizomycotina (subphylum), saccharomyceta (no rank), Ascomycota (phylum), Dikarya (subkingdom), Fungi (kingdom), Opisthokonta (no rank), Eukaryota (superkingdom), cellular organisms …
A1CU29_ASPCL	ACLA_085110	Q4WM24	2.2e-11	no	RAYEACLPCRTSKRRCSGLSPCQTCLRRGQAHSCMPSRRTDHVPA	Fungal_trans domain-containing protein	Aspergillus clavatus (strain ATCC 1007 / CBS 513.65 / DSM 816 / NCTC 3887 / NRRL 1 / QM 1276 / 107)	Pathogen	Aspergillus clavatus (species), Aspergillus subgen. Fumigati (subgenus), Aspergillus (genus), Aspergillaceae (family), Eurotiales (order), Eurotiomycetidae (subclass), Eurotiomycetes (class), leotiomyceta (no rank), Pezizomycotina (subphylum), saccharomyceta (no rank), Ascomycota (phylum), Dikarya (subkingdom), Fungi (kingdom), Opisthokonta (no rank), Eukaryota (superkingdom), cellular organisms …
A1CUM8_ASPCL	ACLA_087190	A0A0K8KZR4	5.6e-13	no	NQVARACDWCRVHRIKCDNTLPCQNCRDRGGYCTKKSAMEFRTL	Fungal specific transcription factor domain protein	Aspergillus clavatus (strain ATCC 1007 / CBS 513.65 / DSM 816 / NCTC 3887 / NRRL 1 / QM 1276 / 107)	Pathogen	Aspergillus clavatus (species), Aspergillus subgen. Fumigati (subgenus), Aspergillus (genus), Aspergillaceae (family), Eurotiales (order), Eurotiomycetidae (subclass), Eurotiomycetes (class), leotiomyceta (no rank), Pezizomycotina (subphylum), saccharomyceta (no rank), Ascomycota (phylum), Dikarya (subkingdom), Fungi (kingdom), Opisthokonta (no rank), Eukaryota (superkingdom), cellular organisms …
A1CUQ3_ASPCL	ACLA_087450	A0A0L1JDD3	9e-13	no	RSNIaCTRCRTRKTRCGGIPPYPCIACEDAGQICVYSEAEKRVSVS	C6 transcription factor, putative	Aspergillus clavatus (strain ATCC 1007 / CBS 513.65 / DSM 816 / NCTC 3887 / NRRL 1 / QM 1276 / 107)	Pathogen	Aspergillus clavatus (species), Aspergillus subgen. Fumigati (subgenus), Aspergillus (genus), Aspergillaceae (family), Eurotiales (order), Eurotiomycetidae (subclass), Eurotiomycetes (class), leotiomyceta (no rank), Pezizomycotina (subphylum), saccharomyceta (no rank), Ascomycota (phylum), Dikarya (subkingdom), Fungi (kingdom), Opisthokonta (no rank), Eukaryota (superkingdom), cellular organisms …
A1CEJ3_ASPCL	ACLA_089840	A0A1T3CHV5	5.4e-10	no	EKPLPSCTFCRSCKVRCHSQFPCTTCMSREIGPSCTYRMGAARKSK	Fungal specific transcription factor domain protein	Aspergillus clavatus (strain ATCC 1007 / CBS 513.65 / DSM 816 / NCTC 3887 / NRRL 1 / QM 1276 / 107)	Pathogen	Aspergillus clavatus (species), Aspergillus subgen. Fumigati (subgenus), Aspergillus (genus), Aspergillaceae (family), Eurotiales (order), Eurotiomycetidae (subclass), Eurotiomycetes (class), leotiomyceta (no rank), Pezizomycotina (subphylum), saccharomyceta (no rank), Ascomycota (phylum), Dikarya (subkingdom), Fungi (kingdom), Opisthokonta (no rank), Eukaryota (superkingdom), cellular organisms …
A1CEP4_ASPCL	ACLA_090360	A0A0K8LRJ7	2.8e-05	no	CESCCRNGAPCEVDESSSSCRQCMRRRIPC	C6 transcription factor, putative	Aspergillus clavatus (strain ATCC 1007 / CBS 513.65 / DSM 816 / NCTC 3887 / NRRL 1 / QM 1276 / 107)	Pathogen	Aspergillus clavatus (species), Aspergillus subgen. Fumigati (subgenus), Aspergillus (genus), Aspergillaceae (family), Eurotiales (order), Eurotiomycetidae (subclass), Eurotiomycetes (class), leotiomyceta (no rank), Pezizomycotina (subphylum), saccharomyceta (no rank), Ascomycota (phylum), Dikarya (subkingdom), Fungi (kingdom), Opisthokonta (no rank), Eukaryota (superkingdom), cellular organisms …
B8NPU3_ASPFN	AFLA_001570	Q2UBC2	1.4e-14	no	RKVRRACDFCRQHRVRCDGRLPCGQCVTNKVECNKPSQHSHSHL	Fungal_trans domain-containing protein	Aspergillus flavus (strain ATCC 200026 / FGSC A1120 / IAM 13836 / NRRL 3357 / JCM 12722 / SRRC 167)	Pathogen	Aspergillus flavus (species), Aspergillus subgen. Circumdati (subgenus), Aspergillus (genus), Aspergillaceae (family), Eurotiales (order), Eurotiomycetidae (subclass), Eurotiomycetes (class), leotiomyceta (no rank), Pezizomycotina (subphylum), saccharomyceta (no rank), Ascomycota (phylum), Dikarya (subkingdom), Fungi (kingdom), Opisthokonta (no rank), Eukaryota (superkingdom), cellular organisms …
B8NQ12_ASPFN	AFLA_003150	A0A017RZU1	4.2e-11	no	YVSKAcGQCQRRKIKCDGCIPCRPCVLNGRDCLMQTVDMRRRGL	Fungal_trans domain-containing protein	Aspergillus flavus (strain ATCC 200026 / FGSC A1120 / IAM 13836 / NRRL 3357 / JCM 12722 / SRRC 167)	Pathogen	Aspergillus flavus (species), Aspergillus subgen. Circumdati (subgenus), Aspergillus (genus), Aspergillaceae (family), Eurotiales (order), Eurotiomycetidae (subclass), Eurotiomycetes (class), leotiomyceta (no rank), Pezizomycotina (subphylum), saccharomyceta (no rank), Ascomycota (phylum), Dikarya (subkingdom), Fungi (kingdom), Opisthokonta (no rank), Eukaryota (superkingdom), cellular organisms …
B8NR54_ASPFN	AFLA_005290	Q2UAC3	6.9e-13	no	ALRLSCQRCHSQKVKCTGGKPCSRCLVAGCEKECRYIKRDRKVRVD	Fungal_trans domain-containing protein	Aspergillus flavus (strain ATCC 200026 / FGSC A1120 / IAM 13836 / NRRL 3357 / JCM 12722 / SRRC 167)	Pathogen	Aspergillus flavus (species), Aspergillus subgen. Circumdati (subgenus), Aspergillus (genus), Aspergillaceae (family), Eurotiales (order), Eurotiomycetidae (subclass), Eurotiomycetes (class), leotiomyceta (no rank), Pezizomycotina (subphylum), saccharomyceta (no rank), Ascomycota (phylum), Dikarya (subkingdom), Fungi (kingdom), Opisthokonta (no rank), Eukaryota (superkingdom), cellular organisms …
B8NXE7_ASPFN	AFLA_007660	A0A017SDT7	1e-15	no	AQVcDRCRvKRVKCDGRRPKCGKCERAGAECSVSVQLRRRTTP	Fungal_trans domain-containing protein	Aspergillus flavus (strain ATCC 200026 / FGSC A1120 / IAM 13836 / NRRL 3357 / JCM 12722 / SRRC 167)	Pathogen	Aspergillus flavus (species), Aspergillus subgen. Circumdati (subgenus), Aspergillus (genus), Aspergillaceae (family), Eurotiales (order), Eurotiomycetidae (subclass), Eurotiomycetes (class), leotiomyceta (no rank), Pezizomycotina (subphylum), saccharomyceta (no rank), Ascomycota (phylum), Dikarya (subkingdom), Fungi (kingdom), Opisthokonta (no rank), Eukaryota (superkingdom), cellular organisms …
B8NXJ7_ASPFN	AFLA_008160	A0A086SXR5	7.4e-13	no	RLFAaCYRCHTHKVKCSGEHPCRACAQANKSDECVFPPRERKVTVS	Fungal_trans domain-containing protein	Aspergillus flavus (strain ATCC 200026 / FGSC A1120 / IAM 13836 / NRRL 3357 / JCM 12722 / SRRC 167)	Pathogen	Aspergillus flavus (species), Aspergillus subgen. Circumdati (subgenus), Aspergillus (genus), Aspergillaceae (family), Eurotiales (order), Eurotiomycetidae (subclass), Eurotiomycetes (class), leotiomyceta (no rank), Pezizomycotina (subphylum), saccharomyceta (no rank), Ascomycota (phylum), Dikarya (subkingdom), Fungi (kingdom), Opisthokonta (no rank), Eukaryota (superkingdom), cellular organisms …
B8NXX9_ASPFN	AFLA_009490	A0A0L1ISU6	4.6e-14	no	RPAYSCTECRRRKVRCDRSQPCNQCTKQDVALSCTYEEHPRAVPRS	C6 transcription factor, putative	Aspergillus flavus (strain ATCC 200026 / FGSC A1120 / IAM 13836 / NRRL 3357 / JCM 12722 / SRRC 167)	Pathogen	Aspergillus flavus (species), Aspergillus subgen. Circumdati (subgenus), Aspergillus (genus), Aspergillaceae (family), Eurotiales (order), Eurotiomycetidae (subclass), Eurotiomycetes (class), leotiomyceta (no rank), Pezizomycotina (subphylum), saccharomyceta (no rank), Ascomycota (phylum), Dikarya (subkingdom), Fungi (kingdom), Opisthokonta (no rank), Eukaryota (superkingdom), cellular organisms …
B8NYN1_ASPFN	AFLA_012010	I8TI39	5.6e-10	no	RRASKACCCCRARKVRCDVVENGSPCTNCRLDQVDCIVTESKRRK	C6 transcription factor (Ctf1B), putative	Aspergillus flavus (strain ATCC 200026 / FGSC A1120 / IAM 13836 / NRRL 3357 / JCM 12722 / SRRC 167)	Pathogen	Aspergillus flavus (species), Aspergillus subgen. Circumdati (subgenus), Aspergillus (genus), Aspergillaceae (family), Eurotiales (order), Eurotiomycetidae (subclass), Eurotiomycetes (class), leotiomyceta (no rank), Pezizomycotina (subphylum), saccharomyceta (no rank), Ascomycota (phylum), Dikarya (subkingdom), Fungi (kingdom), Opisthokonta (no rank), Eukaryota (superkingdom), cellular organisms …
B8N5P7_ASPFN	AFLA_013900	A0A0F0IGE4	1e-14	no	NVSRSCIRCHQRKVRCDKSHPCTTCTRSNVTCRYPGSEKTKRRA	Fungal_trans domain-containing protein	Aspergillus flavus (strain ATCC 200026 / FGSC A1120 / IAM 13836 / NRRL 3357 / JCM 12722 / SRRC 167)	Pathogen	Aspergillus flavus (species), Aspergillus subgen. Circumdati (subgenus), Aspergillus (genus), Aspergillaceae (family), Eurotiales (order), Eurotiomycetidae (subclass), Eurotiomycetes (class), leotiomyceta (no rank), Pezizomycotina (subphylum), saccharomyceta (no rank), Ascomycota (phylum), Dikarya (subkingdom), Fungi (kingdom), Opisthokonta (no rank), Eukaryota (superkingdom), cellular organisms …
B8N5R9_ASPFN	AFLA_014120	I7ZUY1	4.6e-13	no	KVSSACERCRKRKLGCDQQRPCQLCLRAGATCVPRGELVARASP	Fungal_trans domain-containing protein	Aspergillus flavus (strain ATCC 200026 / FGSC A1120 / IAM 13836 / NRRL 3357 / JCM 12722 / SRRC 167)	Pathogen	Aspergillus flavus (species), Aspergillus subgen. Circumdati (subgenus), Aspergillus (genus), Aspergillaceae (family), Eurotiales (order), Eurotiomycetidae (subclass), Eurotiomycetes (class), leotiomyceta (no rank), Pezizomycotina (subphylum), saccharomyceta (no rank), Ascomycota (phylum), Dikarya (subkingdom), Fungi (kingdom), Opisthokonta (no rank), Eukaryota (superkingdom), cellular organisms …
B8N6L7_ASPFN	AFLA_015300	A0A0L1IPH1	3.5e-11	no	RVcMECKKQKTKCETNAGETSCNRCIRHKLDCISHDISQ	L-lactate dehydrogenase, putative	Aspergillus flavus (strain ATCC 200026 / FGSC A1120 / IAM 13836 / NRRL 3357 / JCM 12722 / SRRC 167)	Pathogen	Aspergillus flavus (species), Aspergillus subgen. Circumdati (subgenus), Aspergillus (genus), Aspergillaceae (family), Eurotiales (order), Eurotiomycetidae (subclass), Eurotiomycetes (class), leotiomyceta (no rank), Pezizomycotina (subphylum), saccharomyceta (no rank), Ascomycota (phylum), Dikarya (subkingdom), Fungi (kingdom), Opisthokonta (no rank), Eukaryota (superkingdom), cellular organisms …
B8N6Z9_ASPFN	AFLA_019320	A0A100IAE2	3.2e-12	no	RVPRSCIQCTRRKVKCSKRIPCDKCIERGESAACMREVVKVAGKVT	Fungal_trans domain-containing protein	Aspergillus flavus (strain ATCC 200026 / FGSC A1120 / IAM 13836 / NRRL 3357 / JCM 12722 / SRRC 167)	Pathogen	Aspergillus flavus (species), Aspergillus subgen. Circumdati (subgenus), Aspergillus (genus), Aspergillaceae (family), Eurotiales (order), Eurotiomycetidae (subclass), Eurotiomycetes (class), leotiomyceta (no rank), Pezizomycotina (subphylum), saccharomyceta (no rank), Ascomycota (phylum), Dikarya (subkingdom), Fungi (kingdom), Opisthokonta (no rank), Eukaryota (superkingdom), cellular organisms …
B8N773_ASPFN	AFLA_020060	I8A386	3.4e-10	no	RVPKSCRRCHRRKQRCVGFPTCANCNAANEPCIRLETSPSWHHA	Fungal_trans domain-containing protein	Aspergillus flavus (strain ATCC 200026 / FGSC A1120 / IAM 13836 / NRRL 3357 / JCM 12722 / SRRC 167)	Pathogen	Aspergillus flavus (species), Aspergillus subgen. Circumdati (subgenus), Aspergillus (genus), Aspergillaceae (family), Eurotiales (order), Eurotiomycetidae (subclass), Eurotiomycetes (class), leotiomyceta (no rank), Pezizomycotina (subphylum), saccharomyceta (no rank), Ascomycota (phylum), Dikarya (subkingdom), Fungi (kingdom), Opisthokonta (no rank), Eukaryota (superkingdom), cellular organisms …
B8N2Q8_ASPFN	AFLA_023420	A0A0M8NWC1	3.8e-13	no	RAPIACLRCKRRKTKCNGTRPVCTPCQKARAsCTWAGVSHMGADM	Fungal specific transcription factor, putative	Aspergillus flavus (strain ATCC 200026 / FGSC A1120 / IAM 13836 / NRRL 3357 / JCM 12722 / SRRC 167)	Pathogen	Aspergillus flavus (species), Aspergillus subgen. Circumdati (subgenus), Aspergillus (genus), Aspergillaceae (family), Eurotiales (order), Eurotiomycetidae (subclass), Eurotiomycetes (class), leotiomyceta (no rank), Pezizomycotina (subphylum), saccharomyceta (no rank), Ascomycota (phylum), Dikarya (subkingdom), Fungi (kingdom), Opisthokonta (no rank), Eukaryota (superkingdom), cellular organisms …
B8N2T0_ASPFN	AFLA_023640	A0A0J5SN87	5.4e-14	no	RLSCERCTKRKVKCDRLIPCTNCRNSGILCIPVERRRLPRGR	Fungal_trans domain-containing protein	Aspergillus flavus (strain ATCC 200026 / FGSC A1120 / IAM 13836 / NRRL 3357 / JCM 12722 / SRRC 167)	Pathogen	Aspergillus flavus (species), Aspergillus subgen. Circumdati (subgenus), Aspergillus (genus), Aspergillaceae (family), Eurotiales (order), Eurotiomycetidae (subclass), Eurotiomycetes (class), leotiomyceta (no rank), Pezizomycotina (subphylum), saccharomyceta (no rank), Ascomycota (phylum), Dikarya (subkingdom), Fungi (kingdom), Opisthokonta (no rank), Eukaryota (superkingdom), cellular organisms …
B8N0N1_ASPFN	AFLA_024740	A0A1L9RCV9	4.7e-14	no	YIAKAcNECKRRKIKCNGETPCQRCGRQRIGCVYAEGQRQEIS	C6 transcription factor, putative	Aspergillus flavus (strain ATCC 200026 / FGSC A1120 / IAM 13836 / NRRL 3357 / JCM 12722 / SRRC 167)	Pathogen	Aspergillus flavus (species), Aspergillus subgen. Circumdati (subgenus), Aspergillus (genus), Aspergillaceae (family), Eurotiales (order), Eurotiomycetidae (subclass), Eurotiomycetes (class), leotiomyceta (no rank), Pezizomycotina (subphylum), saccharomyceta (no rank), Ascomycota (phylum), Dikarya (subkingdom), Fungi (kingdom), Opisthokonta (no rank), Eukaryota (superkingdom), cellular organisms …
B8N0Q1_ASPFN	AFLA_025860	I8AE21	3.5e-15	no	RVRQACEPCrRKKAKCPGEQPVCSLCARLQQQCTYADEGRRSLTN	C6 transcription factor, putative	Aspergillus flavus (strain ATCC 200026 / FGSC A1120 / IAM 13836 / NRRL 3357 / JCM 12722 / SRRC 167)	Pathogen	Aspergillus flavus (species), Aspergillus subgen. Circumdati (subgenus), Aspergillus (genus), Aspergillaceae (family), Eurotiales (order), Eurotiomycetidae (subclass), Eurotiomycetes (class), leotiomyceta (no rank), Pezizomycotina (subphylum), saccharomyceta (no rank), Ascomycota (phylum), Dikarya (subkingdom), Fungi (kingdom), Opisthokonta (no rank), Eukaryota (superkingdom), cellular organisms …
B8N128_ASPFN	AFLA_028030	B6QPK9	5.2e-09	no	CSTCrIRKRRCTPGSKGDTCQLCHLLSVPCSL	C6 transcription factor, putative	Aspergillus flavus (strain ATCC 200026 / FGSC A1120 / IAM 13836 / NRRL 3357 / JCM 12722 / SRRC 167)	Pathogen	Aspergillus flavus (species), Aspergillus subgen. Circumdati (subgenus), Aspergillus (genus), Aspergillaceae (family), Eurotiales (order), Eurotiomycetidae (subclass), Eurotiomycetes (class), leotiomyceta (no rank), Pezizomycotina (subphylum), saccharomyceta (no rank), Ascomycota (phylum), Dikarya (subkingdom), Fungi (kingdom), Opisthokonta (no rank), Eukaryota (superkingdom), cellular organisms …
B8N1W5_ASPFN	AFLA_032690	I8IF66	4.8e-14	no	RVPLACESCRGRKTKCSGDTPVCRQCKELRVTCKYPASWRERTKg	C6 transcription factor, putative	Aspergillus flavus (strain ATCC 200026 / FGSC A1120 / IAM 13836 / NRRL 3357 / JCM 12722 / SRRC 167)	Pathogen	Aspergillus flavus (species), Aspergillus subgen. Circumdati (subgenus), Aspergillus (genus), Aspergillaceae (family), Eurotiales (order), Eurotiomycetidae (subclass), Eurotiomycetes (class), leotiomyceta (no rank), Pezizomycotina (subphylum), saccharomyceta (no rank), Ascomycota (phylum), Dikarya (subkingdom), Fungi (kingdom), Opisthokonta (no rank), Eukaryota (superkingdom), cellular organisms …
B8N262_ASPFN	AFLA_034560	A0A0L1IYW8	4.5e-14	no	RSKRHPPCDSCRRKKLRCQAEKGNSCQRCQTSGSSCTFGGLQVVHQ	Fungal_trans domain-containing protein	Aspergillus flavus (strain ATCC 200026 / FGSC A1120 / IAM 13836 / NRRL 3357 / JCM 12722 / SRRC 167)	Pathogen	Aspergillus flavus (species), Aspergillus subgen. Circumdati (subgenus), Aspergillus (genus), Aspergillaceae (family), Eurotiales (order), Eurotiomycetidae (subclass), Eurotiomycetes (class), leotiomyceta (no rank), Pezizomycotina (subphylum), saccharomyceta (no rank), Ascomycota (phylum), Dikarya (subkingdom), Fungi (kingdom), Opisthokonta (no rank), Eukaryota (superkingdom), cellular organisms …
B8NAF1_ASPFN	AFLA_039960	A0A1M3TEH9	3e-10	no	QRSSRACHTCKALKIRCDSQCPCASCMRRGQAHACVYSGTDRRRRK	Fungal_trans domain-containing protein	Aspergillus flavus (strain ATCC 200026 / FGSC A1120 / IAM 13836 / NRRL 3357 / JCM 12722 / SRRC 167)	Pathogen	Aspergillus flavus (species), Aspergillus subgen. Circumdati (subgenus), Aspergillus (genus), Aspergillaceae (family), Eurotiales (order), Eurotiomycetidae (subclass), Eurotiomycetes (class), leotiomyceta (no rank), Pezizomycotina (subphylum), saccharomyceta (no rank), Ascomycota (phylum), Dikarya (subkingdom), Fungi (kingdom), Opisthokonta (no rank), Eukaryota (superkingdom), cellular organisms …
B8NAI5_ASPFN	AFLA_040300	A0A0L1JBQ1	6.3e-16	no	YTTRACEECRRRRAKCDGNRPSCSRCSQWRVPCQYSVAEDGRRPA	C6 transcription factor, putative	Aspergillus flavus (strain ATCC 200026 / FGSC A1120 / IAM 13836 / NRRL 3357 / JCM 12722 / SRRC 167)	Pathogen	Aspergillus flavus (species), Aspergillus subgen. Circumdati (subgenus), Aspergillus (genus), Aspergillaceae (family), Eurotiales (order), Eurotiomycetidae (subclass), Eurotiomycetes (class), leotiomyceta (no rank), Pezizomycotina (subphylum), saccharomyceta (no rank), Ascomycota (phylum), Dikarya (subkingdom), Fungi (kingdom), Opisthokonta (no rank), Eukaryota (superkingdom), cellular organisms …
B8NCC2_ASPFN	AFLA_040970	Q2U0X5	1.5e-16	no	RIGLACNACRVRKSrCDGHRPSCSSCTSLGLECLYEPSESATNVI	Fungal_trans domain-containing protein	Aspergillus flavus (strain ATCC 200026 / FGSC A1120 / IAM 13836 / NRRL 3357 / JCM 12722 / SRRC 167)	Pathogen	Aspergillus flavus (species), Aspergillus subgen. Circumdati (subgenus), Aspergillus (genus), Aspergillaceae (family), Eurotiales (order), Eurotiomycetidae (subclass), Eurotiomycetes (class), leotiomyceta (no rank), Pezizomycotina (subphylum), saccharomyceta (no rank), Ascomycota (phylum), Dikarya (subkingdom), Fungi (kingdom), Opisthokonta (no rank), Eukaryota (superkingdom), cellular organisms …
B8NCR9_ASPFN	AFLA_041540	I8ACB7	3.4e-14	no	RASRACETCHARKVRCDAASLGVPCTNCVAFSIECKIPTPKRKKNQT	C6 transcription factor Ctf1A, putative	Aspergillus flavus (strain ATCC 200026 / FGSC A1120 / IAM 13836 / NRRL 3357 / JCM 12722 / SRRC 167)	Pathogen	Aspergillus flavus (species), Aspergillus subgen. Circumdati (subgenus), Aspergillus (genus), Aspergillaceae (family), Eurotiales (order), Eurotiomycetidae (subclass), Eurotiomycetes (class), leotiomyceta (no rank), Pezizomycotina (subphylum), saccharomyceta (no rank), Ascomycota (phylum), Dikarya (subkingdom), Fungi (kingdom), Opisthokonta (no rank), Eukaryota (superkingdom), cellular organisms …
B8NAR8_ASPFN	AFLA_042930	A0A0F0I1W3	5.5e-12	no	KRHRPCDQCRERKLGCQTDGGLPCVRCRSADLPCTFEHPPPKRPRR	Fungal_trans domain-containing protein	Aspergillus flavus (strain ATCC 200026 / FGSC A1120 / IAM 13836 / NRRL 3357 / JCM 12722 / SRRC 167)	Pathogen	Aspergillus flavus (species), Aspergillus subgen. Circumdati (subgenus), Aspergillus (genus), Aspergillaceae (family), Eurotiales (order), Eurotiomycetidae (subclass), Eurotiomycetes (class), leotiomyceta (no rank), Pezizomycotina (subphylum), saccharomyceta (no rank), Ascomycota (phylum), Dikarya (subkingdom), Fungi (kingdom), Opisthokonta (no rank), Eukaryota (superkingdom), cellular organisms …
B8NAV1_ASPFN	AFLA_043260	I8TKC6	2.7e-12	no	VACKSCNLRRVKCDRTEERPCSYCQLAGQECQPIASRR	Fungal_trans domain-containing protein	Aspergillus flavus (strain ATCC 200026 / FGSC A1120 / IAM 13836 / NRRL 3357 / JCM 12722 / SRRC 167)	Pathogen	Aspergillus flavus (species), Aspergillus subgen. Circumdati (subgenus), Aspergillus (genus), Aspergillaceae (family), Eurotiales (order), Eurotiomycetidae (subclass), Eurotiomycetes (class), leotiomyceta (no rank), Pezizomycotina (subphylum), saccharomyceta (no rank), Ascomycota (phylum), Dikarya (subkingdom), Fungi (kingdom), Opisthokonta (no rank), Eukaryota (superkingdom), cellular organisms …
B8NB50_ASPFN	AFLA_044250	I8A0C1	1.9e-11	no	KNSTACLPCKQAKRKCTGRPAPCKACQNTDAECVFDETLDLRRKV	Fungal_trans domain-containing protein	Aspergillus flavus (strain ATCC 200026 / FGSC A1120 / IAM 13836 / NRRL 3357 / JCM 12722 / SRRC 167)	Pathogen	Aspergillus flavus (species), Aspergillus subgen. Circumdati (subgenus), Aspergillus (genus), Aspergillaceae (family), Eurotiales (order), Eurotiomycetidae (subclass), Eurotiomycetes (class), leotiomyceta (no rank), Pezizomycotina (subphylum), saccharomyceta (no rank), Ascomycota (phylum), Dikarya (subkingdom), Fungi (kingdom), Opisthokonta (no rank), Eukaryota (superkingdom), cellular organisms …
B8NRI7_ASPFN	AFLA_048920	I8TFH4	8.2e-17	no	IATVACETCRLKKTRCDESRPKCGLCKSLGLECVYNERKSSkRDH	C6 finger domain protein, putative	Aspergillus flavus (strain ATCC 200026 / FGSC A1120 / IAM 13836 / NRRL 3357 / JCM 12722 / SRRC 167)	Pathogen	Aspergillus flavus (species), Aspergillus subgen. Circumdati (subgenus), Aspergillus (genus), Aspergillaceae (family), Eurotiales (order), Eurotiomycetidae (subclass), Eurotiomycetes (class), leotiomyceta (no rank), Pezizomycotina (subphylum), saccharomyceta (no rank), Ascomycota (phylum), Dikarya (subkingdom), Fungi (kingdom), Opisthokonta (no rank), Eukaryota (superkingdom), cellular organisms …
B8NRM2_ASPFN	AFLA_049270	I8TFW3	1.4e-13	no	RKTFACDECKRRKVRCSGDDTCANCIRDAKACRYSSPSQKLSSL	C6 transcription factor, putative	Aspergillus flavus (strain ATCC 200026 / FGSC A1120 / IAM 13836 / NRRL 3357 / JCM 12722 / SRRC 167)	Pathogen	Aspergillus flavus (species), Aspergillus subgen. Circumdati (subgenus), Aspergillus (genus), Aspergillaceae (family), Eurotiales (order), Eurotiomycetidae (subclass), Eurotiomycetes (class), leotiomyceta (no rank), Pezizomycotina (subphylum), saccharomyceta (no rank), Ascomycota (phylum), Dikarya (subkingdom), Fungi (kingdom), Opisthokonta (no rank), Eukaryota (superkingdom), cellular organisms …
B8NSM1_ASPFN	AFLA_049720	I7ZL28	8e-13	no	KHKTTACRACKLKKLKCRGDPPCEHCTLNGIECVVDEMADMRRK	C6 transcription factor, putative	Aspergillus flavus (strain ATCC 200026 / FGSC A1120 / IAM 13836 / NRRL 3357 / JCM 12722 / SRRC 167)	Pathogen	Aspergillus flavus (species), Aspergillus subgen. Circumdati (subgenus), Aspergillus (genus), Aspergillaceae (family), Eurotiales (order), Eurotiomycetidae (subclass), Eurotiomycetes (class), leotiomyceta (no rank), Pezizomycotina (subphylum), saccharomyceta (no rank), Ascomycota (phylum), Dikarya (subkingdom), Fungi (kingdom), Opisthokonta (no rank), Eukaryota (superkingdom), cellular organisms …
B8NRV5_ASPFN	AFLA_050970	A0A0K8L883	3.3e-15	no	ASGRSCLECRRRKIKCDRSLPCAYCVRTHIHCTYPQPKTGQDAD	Fungal specific transcription factor, putative	Aspergillus flavus (strain ATCC 200026 / FGSC A1120 / IAM 13836 / NRRL 3357 / JCM 12722 / SRRC 167)	Pathogen	Aspergillus flavus (species), Aspergillus subgen. Circumdati (subgenus), Aspergillus (genus), Aspergillaceae (family), Eurotiales (order), Eurotiomycetidae (subclass), Eurotiomycetes (class), leotiomyceta (no rank), Pezizomycotina (subphylum), saccharomyceta (no rank), Ascomycota (phylum), Dikarya (subkingdom), Fungi (kingdom), Opisthokonta (no rank), Eukaryota (superkingdom), cellular organisms …
B8NSU1_ASPFN	AFLA_051340	Q2UUF4	7.4e-16	no	AHTLTACTRCRQRKSRCDPGIPRCSPCERSNAKCVYFDSAR	C6 transcription factor, putative	Aspergillus flavus (strain ATCC 200026 / FGSC A1120 / IAM 13836 / NRRL 3357 / JCM 12722 / SRRC 167)	Pathogen	Aspergillus flavus (species), Aspergillus subgen. Circumdati (subgenus), Aspergillus (genus), Aspergillaceae (family), Eurotiales (order), Eurotiomycetidae (subclass), Eurotiomycetes (class), leotiomyceta (no rank), Pezizomycotina (subphylum), saccharomyceta (no rank), Ascomycota (phylum), Dikarya (subkingdom), Fungi (kingdom), Opisthokonta (no rank), Eukaryota (superkingdom), cellular organisms …
B8NSU2_ASPFN	AFLA_051350	I7ZL46	1.2e-14	no	RPVAACSRCRTAKVKCDGKLPACSACERVGKASTCSGASDEFARGKE	C6 transcription factor, putative	Aspergillus flavus (strain ATCC 200026 / FGSC A1120 / IAM 13836 / NRRL 3357 / JCM 12722 / SRRC 167)	Pathogen	Aspergillus flavus (species), Aspergillus subgen. Circumdati (subgenus), Aspergillus (genus), Aspergillaceae (family), Eurotiales (order), Eurotiomycetidae (subclass), Eurotiomycetes (class), leotiomyceta (no rank), Pezizomycotina (subphylum), saccharomyceta (no rank), Ascomycota (phylum), Dikarya (subkingdom), Fungi (kingdom), Opisthokonta (no rank), Eukaryota (superkingdom), cellular organisms …
B8NSZ5_ASPFN	AFLA_051880	A1DK66	6.5e-12	no	RAARaCNPCRYHKEKcQGGMPCLRCQRYKRNCQYSQAPPQCQKV	Fungal_trans domain-containing protein	Aspergillus flavus (strain ATCC 200026 / FGSC A1120 / IAM 13836 / NRRL 3357 / JCM 12722 / SRRC 167)	Pathogen	Aspergillus flavus (species), Aspergillus subgen. Circumdati (subgenus), Aspergillus (genus), Aspergillaceae (family), Eurotiales (order), Eurotiomycetidae (subclass), Eurotiomycetes (class), leotiomyceta (no rank), Pezizomycotina (subphylum), saccharomyceta (no rank), Ascomycota (phylum), Dikarya (subkingdom), Fungi (kingdom), Opisthokonta (no rank), Eukaryota (superkingdom), cellular organisms …
B8NS63_ASPFN	AFLA_052940	A0A0L1IR39	3.7e-12	no	RRTIACQTCRQRKVRCSLNVTGVPCIGCTQDRTPCIVTTRRGQkSEK	Fungal_trans domain-containing protein	Aspergillus flavus (strain ATCC 200026 / FGSC A1120 / IAM 13836 / NRRL 3357 / JCM 12722 / SRRC 167)	Pathogen	Aspergillus flavus (species), Aspergillus subgen. Circumdati (subgenus), Aspergillus (genus), Aspergillaceae (family), Eurotiales (order), Eurotiomycetidae (subclass), Eurotiomycetes (class), leotiomyceta (no rank), Pezizomycotina (subphylum), saccharomyceta (no rank), Ascomycota (phylum), Dikarya (subkingdom), Fungi (kingdom), Opisthokonta (no rank), Eukaryota (superkingdom), cellular organisms …
B8NT67_ASPFN	AFLA_053500	A0A1L9Q1A1	1.6e-14	no	RRPPLSCAPCRRRKVKCDRRQPCNQCISHNMADLCYYQDKERSPPS	Fungal_trans domain-containing protein	Aspergillus flavus (strain ATCC 200026 / FGSC A1120 / IAM 13836 / NRRL 3357 / JCM 12722 / SRRC 167)	Pathogen	Aspergillus flavus (species), Aspergillus subgen. Circumdati (subgenus), Aspergillus (genus), Aspergillaceae (family), Eurotiales (order), Eurotiomycetidae (subclass), Eurotiomycetes (class), leotiomyceta (no rank), Pezizomycotina (subphylum), saccharomyceta (no rank), Ascomycota (phylum), Dikarya (subkingdom), Fungi (kingdom), Opisthokonta (no rank), Eukaryota (superkingdom), cellular organisms …
B8NSA9_ASPFN	AFLA_054310	Q2UV64	3.5e-11	no	RKVTRACDACKRKKKACTGNLPCRPCLKRQEVCTYNSTYNRGVA	Fungal_trans domain-containing protein	Aspergillus flavus (strain ATCC 200026 / FGSC A1120 / IAM 13836 / NRRL 3357 / JCM 12722 / SRRC 167)	Pathogen	Aspergillus flavus (species), Aspergillus subgen. Circumdati (subgenus), Aspergillus (genus), Aspergillaceae (family), Eurotiales (order), Eurotiomycetidae (subclass), Eurotiomycetes (class), leotiomyceta (no rank), Pezizomycotina (subphylum), saccharomyceta (no rank), Ascomycota (phylum), Dikarya (subkingdom), Fungi (kingdom), Opisthokonta (no rank), Eukaryota (superkingdom), cellular organisms …
B8NSB7_ASPFN	AFLA_054390	A0A0J0CH40	3.1e-14	no	LSDLACQSCRkRKVKcDRTLPRCMVCEQTRQTCNYPLGSMKPGPK	Fungal_trans domain-containing protein	Aspergillus flavus (strain ATCC 200026 / FGSC A1120 / IAM 13836 / NRRL 3357 / JCM 12722 / SRRC 167)	Pathogen	Aspergillus flavus (species), Aspergillus subgen. Circumdati (subgenus), Aspergillus (genus), Aspergillaceae (family), Eurotiales (order), Eurotiomycetidae (subclass), Eurotiomycetes (class), leotiomyceta (no rank), Pezizomycotina (subphylum), saccharomyceta (no rank), Ascomycota (phylum), Dikarya (subkingdom), Fungi (kingdom), Opisthokonta (no rank), Eukaryota (superkingdom), cellular organisms …
B8ND26_ASPFN	AFLA_054970	I8U8B9	3.7e-16	no	AIAKRACDQCKFRKIKCSLSQPCKACVSMGFECTFFQPQKKRGP	C6 transcription factor, putative	Aspergillus flavus (strain ATCC 200026 / FGSC A1120 / IAM 13836 / NRRL 3357 / JCM 12722 / SRRC 167)	Pathogen	Aspergillus flavus (species), Aspergillus subgen. Circumdati (subgenus), Aspergillus (genus), Aspergillaceae (family), Eurotiales (order), Eurotiomycetidae (subclass), Eurotiomycetes (class), leotiomyceta (no rank), Pezizomycotina (subphylum), saccharomyceta (no rank), Ascomycota (phylum), Dikarya (subkingdom), Fungi (kingdom), Opisthokonta (no rank), Eukaryota (superkingdom), cellular organisms …
B8NDE0_ASPFN	AFLA_057010	B6H5S0	6.5e-17	no	SGRLACDICRERKVRCDRGDPKCGRCARLGYDCSYQGRRRYRAA	Fungal_trans domain-containing protein	Aspergillus flavus (strain ATCC 200026 / FGSC A1120 / IAM 13836 / NRRL 3357 / JCM 12722 / SRRC 167)	Pathogen	Aspergillus flavus (species), Aspergillus subgen. Circumdati (subgenus), Aspergillus (genus), Aspergillaceae (family), Eurotiales (order), Eurotiomycetidae (subclass), Eurotiomycetes (class), leotiomyceta (no rank), Pezizomycotina (subphylum), saccharomyceta (no rank), Ascomycota (phylum), Dikarya (subkingdom), Fungi (kingdom), Opisthokonta (no rank), Eukaryota (superkingdom), cellular organisms …
B8NF52_ASPFN	AFLA_060960	A0A1L9P2P6	9.6e-16	no	RYGFACLVCRRRKVKCDGRWPTCVNCARLKETCSYKEKTAYTVRL	Nitrogen assimilation transcription factor nirA, putative	Aspergillus flavus (strain ATCC 200026 / FGSC A1120 / IAM 13836 / NRRL 3357 / JCM 12722 / SRRC 167)	Pathogen	Aspergillus flavus (species), Aspergillus subgen. Circumdati (subgenus), Aspergillus (genus), Aspergillaceae (family), Eurotiales (order), Eurotiomycetidae (subclass), Eurotiomycetes (class), leotiomyceta (no rank), Pezizomycotina (subphylum), saccharomyceta (no rank), Ascomycota (phylum), Dikarya (subkingdom), Fungi (kingdom), Opisthokonta (no rank), Eukaryota (superkingdom), cellular organisms …
B8NET5_ASPFN	AFLA_063720	I8TSA9	4.1e-15	no	ELSVACSNCRNRKLRCSKETPACQHCRKTgGHCVYDPKRSKPGIK	Fungal_trans domain-containing protein	Aspergillus flavus (strain ATCC 200026 / FGSC A1120 / IAM 13836 / NRRL 3357 / JCM 12722 / SRRC 167)	Pathogen	Aspergillus flavus (species), Aspergillus subgen. Circumdati (subgenus), Aspergillus (genus), Aspergillaceae (family), Eurotiales (order), Eurotiomycetidae (subclass), Eurotiomycetes (class), leotiomyceta (no rank), Pezizomycotina (subphylum), saccharomyceta (no rank), Ascomycota (phylum), Dikarya (subkingdom), Fungi (kingdom), Opisthokonta (no rank), Eukaryota (superkingdom), cellular organisms …
B8NI32_ASPFN	AFLA_064370	A0A1L9V5A2	8.3e-16	no	TEKLACYRCRQRKVKCDRASPCSHCVKAGTQCSYASGPKPRERR	C6 transcription factor, putative	Aspergillus flavus (strain ATCC 200026 / FGSC A1120 / IAM 13836 / NRRL 3357 / JCM 12722 / SRRC 167)	Pathogen	Aspergillus flavus (species), Aspergillus subgen. Circumdati (subgenus), Aspergillus (genus), Aspergillaceae (family), Eurotiales (order), Eurotiomycetidae (subclass), Eurotiomycetes (class), leotiomyceta (no rank), Pezizomycotina (subphylum), saccharomyceta (no rank), Ascomycota (phylum), Dikarya (subkingdom), Fungi (kingdom), Opisthokonta (no rank), Eukaryota (superkingdom), cellular organisms …
B8NJ98_ASPFN	AFLA_065310	I8TTJ6	4.3e-17	no	RRPLACMRCRRRKVRCDGGTPACSNCARAGVECFEGTPGSAVSKs	Fungal_trans domain-containing protein	Aspergillus flavus (strain ATCC 200026 / FGSC A1120 / IAM 13836 / NRRL 3357 / JCM 12722 / SRRC 167)	Pathogen	Aspergillus flavus (species), Aspergillus subgen. Circumdati (subgenus), Aspergillus (genus), Aspergillaceae (family), Eurotiales (order), Eurotiomycetidae (subclass), Eurotiomycetes (class), leotiomyceta (no rank), Pezizomycotina (subphylum), saccharomyceta (no rank), Ascomycota (phylum), Dikarya (subkingdom), Fungi (kingdom), Opisthokonta (no rank), Eukaryota (superkingdom), cellular organisms …
B8NJB5_ASPFN	AFLA_065480	I8TTI7	5.8e-14	no	HIKHACAHCRKTKSRCQGDPPCSECLHRGIHCSLDRQVEALSPP	Fungal_trans domain-containing protein	Aspergillus flavus (strain ATCC 200026 / FGSC A1120 / IAM 13836 / NRRL 3357 / JCM 12722 / SRRC 167)	Pathogen	Aspergillus flavus (species), Aspergillus subgen. Circumdati (subgenus), Aspergillus (genus), Aspergillaceae (family), Eurotiales (order), Eurotiomycetidae (subclass), Eurotiomycetes (class), leotiomyceta (no rank), Pezizomycotina (subphylum), saccharomyceta (no rank), Ascomycota (phylum), Dikarya (subkingdom), Fungi (kingdom), Opisthokonta (no rank), Eukaryota (superkingdom), cellular organisms …
B8NI95_ASPFN	AFLA_065910	A0A0F0ILC5	8.5e-13	no	RACDRCKARKSKCVESNPGRCQRCVVNNLPCNFQRPKSPP	Fungal_trans domain-containing protein	Aspergillus flavus (strain ATCC 200026 / FGSC A1120 / IAM 13836 / NRRL 3357 / JCM 12722 / SRRC 167)	Pathogen	Aspergillus flavus (species), Aspergillus subgen. Circumdati (subgenus), Aspergillus (genus), Aspergillaceae (family), Eurotiales (order), Eurotiomycetidae (subclass), Eurotiomycetes (class), leotiomyceta (no rank), Pezizomycotina (subphylum), saccharomyceta (no rank), Ascomycota (phylum), Dikarya (subkingdom), Fungi (kingdom), Opisthokonta (no rank), Eukaryota (superkingdom), cellular organisms …
LEPB_ASPFN	AFLA_066860	A0A0F0IJ73	1.4e-13	no	QLPVSCQLCRSMKLKCSRDQPCSNCVSRGVTCERAYRMEPTTSS	Probable transcription factor lepB (Leporins biosynthesis protein B)	Aspergillus flavus (strain ATCC 200026 / FGSC A1120 / IAM 13836 / NRRL 3357 / JCM 12722 / SRRC 167)	Pathogen	Aspergillus flavus (species), Aspergillus subgen. Circumdati (subgenus), Aspergillus (genus), Aspergillaceae (family), Eurotiales (order), Eurotiomycetidae (subclass), Eurotiomycetes (class), leotiomyceta (no rank), Pezizomycotina (subphylum), saccharomyceta (no rank), Ascomycota (phylum), Dikarya (subkingdom), Fungi (kingdom), Opisthokonta (no rank), Eukaryota (superkingdom), cellular organisms …
B8NK48_ASPFN	AFLA_070970	A0A0L1ILF8	1.6e-17	no	RRRSARACEPCRQRKIKCDGNKPACKQCVEHNVSCSYLDVKRVRD	C6 transcription factor, putative	Aspergillus flavus (strain ATCC 200026 / FGSC A1120 / IAM 13836 / NRRL 3357 / JCM 12722 / SRRC 167)	Pathogen	Aspergillus flavus (species), Aspergillus subgen. Circumdati (subgenus), Aspergillus (genus), Aspergillaceae (family), Eurotiales (order), Eurotiomycetidae (subclass), Eurotiomycetes (class), leotiomyceta (no rank), Pezizomycotina (subphylum), saccharomyceta (no rank), Ascomycota (phylum), Dikarya (subkingdom), Fungi (kingdom), Opisthokonta (no rank), Eukaryota (superkingdom), cellular organisms …
B8MVT2_ASPFN	AFLA_072790	A0A0L1ITG2	7e-14	no	HSCQRCRRQKIKCSGSQPCDTCSKRKSTCTFDDRDQKILV	Fungal_trans domain-containing protein	Aspergillus flavus (strain ATCC 200026 / FGSC A1120 / IAM 13836 / NRRL 3357 / JCM 12722 / SRRC 167)	Pathogen	Aspergillus flavus (species), Aspergillus subgen. Circumdati (subgenus), Aspergillus (genus), Aspergillaceae (family), Eurotiales (order), Eurotiomycetidae (subclass), Eurotiomycetes (class), leotiomyceta (no rank), Pezizomycotina (subphylum), saccharomyceta (no rank), Ascomycota (phylum), Dikarya (subkingdom), Fungi (kingdom), Opisthokonta (no rank), Eukaryota (superkingdom), cellular organisms …
B8MW73_ASPFN	AFLA_074200	A0A0F0I6U4	4.6e-17	no	PSSLACVSCRRRHLKCDALLPACTRCQSTNLECRYVRSRRGLRTK	C6 transcription factor, putative	Aspergillus flavus (strain ATCC 200026 / FGSC A1120 / IAM 13836 / NRRL 3357 / JCM 12722 / SRRC 167)	Pathogen	Aspergillus flavus (species), Aspergillus subgen. Circumdati (subgenus), Aspergillus (genus), Aspergillaceae (family), Eurotiales (order), Eurotiomycetidae (subclass), Eurotiomycetes (class), leotiomyceta (no rank), Pezizomycotina (subphylum), saccharomyceta (no rank), Ascomycota (phylum), Dikarya (subkingdom), Fungi (kingdom), Opisthokonta (no rank), Eukaryota (superkingdom), cellular organisms …
B8MW76_ASPFN	AFLA_074230	A0A0F0I3B9	1.2e-13	no	RIITSCSECHRRKQKCDRKFPCNNCLARNVARKCVYNARQnSGQIA	Fungal_trans domain-containing protein	Aspergillus flavus (strain ATCC 200026 / FGSC A1120 / IAM 13836 / NRRL 3357 / JCM 12722 / SRRC 167)	Pathogen	Aspergillus flavus (species), Aspergillus subgen. Circumdati (subgenus), Aspergillus (genus), Aspergillaceae (family), Eurotiales (order), Eurotiomycetidae (subclass), Eurotiomycetes (class), leotiomyceta (no rank), Pezizomycotina (subphylum), saccharomyceta (no rank), Ascomycota (phylum), Dikarya (subkingdom), Fungi (kingdom), Opisthokonta (no rank), Eukaryota (superkingdom), cellular organisms …
B8MWU5_ASPFN	AFLA_075320	A0A0F0I5B9	1.1e-16	no	RRVALACDICRTRKSRCDGIRPQCGMCKDLGFECVYTPAVTATNV	C6 transcription factor, putative	Aspergillus flavus (strain ATCC 200026 / FGSC A1120 / IAM 13836 / NRRL 3357 / JCM 12722 / SRRC 167)	Pathogen	Aspergillus flavus (species), Aspergillus subgen. Circumdati (subgenus), Aspergillus (genus), Aspergillaceae (family), Eurotiales (order), Eurotiomycetidae (subclass), Eurotiomycetes (class), leotiomyceta (no rank), Pezizomycotina (subphylum), saccharomyceta (no rank), Ascomycota (phylum), Dikarya (subkingdom), Fungi (kingdom), Opisthokonta (no rank), Eukaryota (superkingdom), cellular organisms …
B8MX45_ASPFN	AFLA_076320	A0A0F0I1W7	8.5e-14	no	PPRVLSCVLCQQRKVRCNREFPCVNCTRAGVQCIPATGVRQRRR	C6 transcription factor, putative	Aspergillus flavus (strain ATCC 200026 / FGSC A1120 / IAM 13836 / NRRL 3357 / JCM 12722 / SRRC 167)	Pathogen	Aspergillus flavus (species), Aspergillus subgen. Circumdati (subgenus), Aspergillus (genus), Aspergillaceae (family), Eurotiales (order), Eurotiomycetidae (subclass), Eurotiomycetes (class), leotiomyceta (no rank), Pezizomycotina (subphylum), saccharomyceta (no rank), Ascomycota (phylum), Dikarya (subkingdom), Fungi (kingdom), Opisthokonta (no rank), Eukaryota (superkingdom), cellular organisms …
B8MXT3_ASPFN	AFLA_078700	I8I9U6	5.1e-14	no	NRVPLSCGPCRHRKLKCNRAHPCENCVKRGDAASCTYAQASTRKKN	C6 transcription factor, putative	Aspergillus flavus (strain ATCC 200026 / FGSC A1120 / IAM 13836 / NRRL 3357 / JCM 12722 / SRRC 167)	Pathogen	Aspergillus flavus (species), Aspergillus subgen. Circumdati (subgenus), Aspergillus (genus), Aspergillaceae (family), Eurotiales (order), Eurotiomycetidae (subclass), Eurotiomycetes (class), leotiomyceta (no rank), Pezizomycotina (subphylum), saccharomyceta (no rank), Ascomycota (phylum), Dikarya (subkingdom), Fungi (kingdom), Opisthokonta (no rank), Eukaryota (superkingdom), cellular organisms …
B8MZC0_ASPFN	AFLA_084090	I8A4L0	6.7e-14	no	NRNRAACRRCQRRKIRCDGQSPRCGACQKASTPCINDGKQLVQRS	C6 transcription factor, putative	Aspergillus flavus (strain ATCC 200026 / FGSC A1120 / IAM 13836 / NRRL 3357 / JCM 12722 / SRRC 167)	Pathogen	Aspergillus flavus (species), Aspergillus subgen. Circumdati (subgenus), Aspergillus (genus), Aspergillaceae (family), Eurotiales (order), Eurotiomycetidae (subclass), Eurotiomycetes (class), leotiomyceta (no rank), Pezizomycotina (subphylum), saccharomyceta (no rank), Ascomycota (phylum), Dikarya (subkingdom), Fungi (kingdom), Opisthokonta (no rank), Eukaryota (superkingdom), cellular organisms …
B8MZT4_ASPFN	AFLA_085740	I8ADD9	4.6e-15	no	RRRTMACVQCRSRKLRCDRKLPMCSRCESSKTAINCTYEKEFLWQQP	C6 transcription factor, putative	Aspergillus flavus (strain ATCC 200026 / FGSC A1120 / IAM 13836 / NRRL 3357 / JCM 12722 / SRRC 167)	Pathogen	Aspergillus flavus (species), Aspergillus subgen. Circumdati (subgenus), Aspergillus (genus), Aspergillaceae (family), Eurotiales (order), Eurotiomycetidae (subclass), Eurotiomycetes (class), leotiomyceta (no rank), Pezizomycotina (subphylum), saccharomyceta (no rank), Ascomycota (phylum), Dikarya (subkingdom), Fungi (kingdom), Opisthokonta (no rank), Eukaryota (superkingdom), cellular organisms …
B8N068_ASPFN	AFLA_087080	A0A1M3TR57	8.3e-15	no	RASRACETCRVRKTKCDQAQPCSYCAyHALDCVYRALGQNESST	Fungal_trans domain-containing protein	Aspergillus flavus (strain ATCC 200026 / FGSC A1120 / IAM 13836 / NRRL 3357 / JCM 12722 / SRRC 167)	Pathogen	Aspergillus flavus (species), Aspergillus subgen. Circumdati (subgenus), Aspergillus (genus), Aspergillaceae (family), Eurotiales (order), Eurotiomycetidae (subclass), Eurotiomycetes (class), leotiomyceta (no rank), Pezizomycotina (subphylum), saccharomyceta (no rank), Ascomycota (phylum), Dikarya (subkingdom), Fungi (kingdom), Opisthokonta (no rank), Eukaryota (superkingdom), cellular organisms …
B8NKI6_ASPFN	AFLA_091520	A0A0F0INL0	3.5e-15	no	RATNaCESCRRRKVKCSGDQPCRSCVRHNWECVPGHAGRRRYTE	Fungal_trans domain-containing protein	Aspergillus flavus (strain ATCC 200026 / FGSC A1120 / IAM 13836 / NRRL 3357 / JCM 12722 / SRRC 167)	Pathogen	Aspergillus flavus (species), Aspergillus subgen. Circumdati (subgenus), Aspergillus (genus), Aspergillaceae (family), Eurotiales (order), Eurotiomycetidae (subclass), Eurotiomycetes (class), leotiomyceta (no rank), Pezizomycotina (subphylum), saccharomyceta (no rank), Ascomycota (phylum), Dikarya (subkingdom), Fungi (kingdom), Opisthokonta (no rank), Eukaryota (superkingdom), cellular organisms …
B8NL49_ASPFN	AFLA_096330	A0A0F0IPP3	1.4e-13	no	GRVSRACKNCALSKLKCDDQKPCRRCVKRNLECHWPQDERTPDA	C6 and C2H2 transcription factor	Aspergillus flavus (strain ATCC 200026 / FGSC A1120 / IAM 13836 / NRRL 3357 / JCM 12722 / SRRC 167)	Pathogen	Aspergillus flavus (species), Aspergillus subgen. Circumdati (subgenus), Aspergillus (genus), Aspergillaceae (family), Eurotiales (order), Eurotiomycetidae (subclass), Eurotiomycetes (class), leotiomyceta (no rank), Pezizomycotina (subphylum), saccharomyceta (no rank), Ascomycota (phylum), Dikarya (subkingdom), Fungi (kingdom), Opisthokonta (no rank), Eukaryota (superkingdom), cellular organisms …
B8NTB8_ASPFN	AFLA_097580	A0A0F7VBX6	5.4e-12	no	VPRLPACQSCYTKKVKCDNARPKCMPCMKSGHACFTVSL	Fungal_trans domain-containing protein	Aspergillus flavus (strain ATCC 200026 / FGSC A1120 / IAM 13836 / NRRL 3357 / JCM 12722 / SRRC 167)	Pathogen	Aspergillus flavus (species), Aspergillus subgen. Circumdati (subgenus), Aspergillus (genus), Aspergillaceae (family), Eurotiales (order), Eurotiomycetidae (subclass), Eurotiomycetes (class), leotiomyceta (no rank), Pezizomycotina (subphylum), saccharomyceta (no rank), Ascomycota (phylum), Dikarya (subkingdom), Fungi (kingdom), Opisthokonta (no rank), Eukaryota (superkingdom), cellular organisms …
B8NTB9_ASPFN	AFLA_097590	A0A0L1IMK1	7.1e-12	no	RRLQACERCWKRKQKCDRQLPACTTCVEADAQCAPRRVPIGPTT	Fungal_trans domain-containing protein	Aspergillus flavus (strain ATCC 200026 / FGSC A1120 / IAM 13836 / NRRL 3357 / JCM 12722 / SRRC 167)	Pathogen	Aspergillus flavus (species), Aspergillus subgen. Circumdati (subgenus), Aspergillus (genus), Aspergillaceae (family), Eurotiales (order), Eurotiomycetidae (subclass), Eurotiomycetes (class), leotiomyceta (no rank), Pezizomycotina (subphylum), saccharomyceta (no rank), Ascomycota (phylum), Dikarya (subkingdom), Fungi (kingdom), Opisthokonta (no rank), Eukaryota (superkingdom), cellular organisms …
B8NTF2_ASPFN	AFLA_097920	A0A0L1J910	5.3e-14	no	TRVSSACERCRLHKSRCDPFRPCTLCVRANVDCQALPLQQKDA	C6 transcription factor, putative	Aspergillus flavus (strain ATCC 200026 / FGSC A1120 / IAM 13836 / NRRL 3357 / JCM 12722 / SRRC 167)	Pathogen	Aspergillus flavus (species), Aspergillus subgen. Circumdati (subgenus), Aspergillus (genus), Aspergillaceae (family), Eurotiales (order), Eurotiomycetidae (subclass), Eurotiomycetes (class), leotiomyceta (no rank), Pezizomycotina (subphylum), saccharomyceta (no rank), Ascomycota (phylum), Dikarya (subkingdom), Fungi (kingdom), Opisthokonta (no rank), Eukaryota (superkingdom), cellular organisms …
B8NTX1_ASPFN	AFLA_101420	A0A0F0IM61	1.4e-14	no	HSCVSCRQSKIKCSGTDPCNNCQRRKVRCVFTEPPNKVVVT	Fungal_trans domain-containing protein	Aspergillus flavus (strain ATCC 200026 / FGSC A1120 / IAM 13836 / NRRL 3357 / JCM 12722 / SRRC 167)	Pathogen	Aspergillus flavus (species), Aspergillus subgen. Circumdati (subgenus), Aspergillus (genus), Aspergillaceae (family), Eurotiales (order), Eurotiomycetidae (subclass), Eurotiomycetes (class), leotiomyceta (no rank), Pezizomycotina (subphylum), saccharomyceta (no rank), Ascomycota (phylum), Dikarya (subkingdom), Fungi (kingdom), Opisthokonta (no rank), Eukaryota (superkingdom), cellular organisms …
B8NTX9_ASPFN	AFLA_101500	A0A0L1JEG2	2e-15	no	QRRRACDSCFKRKIQCDTEFPQCNWCKHHNLACTYNRLQTRTEAr	Fungal_trans domain-containing protein	Aspergillus flavus (strain ATCC 200026 / FGSC A1120 / IAM 13836 / NRRL 3357 / JCM 12722 / SRRC 167)	Pathogen	Aspergillus flavus (species), Aspergillus subgen. Circumdati (subgenus), Aspergillus (genus), Aspergillaceae (family), Eurotiales (order), Eurotiomycetidae (subclass), Eurotiomycetes (class), leotiomyceta (no rank), Pezizomycotina (subphylum), saccharomyceta (no rank), Ascomycota (phylum), Dikarya (subkingdom), Fungi (kingdom), Opisthokonta (no rank), Eukaryota (superkingdom), cellular organisms …
B8NU26_ASPFN	AFLA_101970	A0A150VD55	7.8e-13	no	SDGQISCEPCRQKKCKCQRKIPICTQCATSQSKCIYPESGKR	C6 transcription factor, putative	Aspergillus flavus (strain ATCC 200026 / FGSC A1120 / IAM 13836 / NRRL 3357 / JCM 12722 / SRRC 167)	Pathogen	Aspergillus flavus (species), Aspergillus subgen. Circumdati (subgenus), Aspergillus (genus), Aspergillaceae (family), Eurotiales (order), Eurotiomycetidae (subclass), Eurotiomycetes (class), leotiomyceta (no rank), Pezizomycotina (subphylum), saccharomyceta (no rank), Ascomycota (phylum), Dikarya (subkingdom), Fungi (kingdom), Opisthokonta (no rank), Eukaryota (superkingdom), cellular organisms …
B8NUX9_ASPFN	AFLA_102730	Q2U500	3e-15	no	TPKNPSCVVCARRKVRCDRNDPCSACIKRGIECVFPTHIPPRRR	Fungal_trans domain-containing protein	Aspergillus flavus (strain ATCC 200026 / FGSC A1120 / IAM 13836 / NRRL 3357 / JCM 12722 / SRRC 167)	Pathogen	Aspergillus flavus (species), Aspergillus subgen. Circumdati (subgenus), Aspergillus (genus), Aspergillaceae (family), Eurotiales (order), Eurotiomycetidae (subclass), Eurotiomycetes (class), leotiomyceta (no rank), Pezizomycotina (subphylum), saccharomyceta (no rank), Ascomycota (phylum), Dikarya (subkingdom), Fungi (kingdom), Opisthokonta (no rank), Eukaryota (superkingdom), cellular organisms …
B8N867_ASPFN	AFLA_106610	A0A0L1JAY7	1.8e-13	no	KSVaCHRCHSHKVKCSGEQPCARCSQAGCGDECQYTVRDRKLKVN	Fungal_trans domain-containing protein	Aspergillus flavus (strain ATCC 200026 / FGSC A1120 / IAM 13836 / NRRL 3357 / JCM 12722 / SRRC 167)	Pathogen	Aspergillus flavus (species), Aspergillus subgen. Circumdati (subgenus), Aspergillus (genus), Aspergillaceae (family), Eurotiales (order), Eurotiomycetidae (subclass), Eurotiomycetes (class), leotiomyceta (no rank), Pezizomycotina (subphylum), saccharomyceta (no rank), Ascomycota (phylum), Dikarya (subkingdom), Fungi (kingdom), Opisthokonta (no rank), Eukaryota (superkingdom), cellular organisms …
B8N885_ASPFN	AFLA_106790	Q2UHY9	5.6e-16	no	SKRVSTACDFCRKRKKKCDFRYPNCSACTRAGVRCTIPPPGPQVA	C6 transcription factor, putative	Aspergillus flavus (strain ATCC 200026 / FGSC A1120 / IAM 13836 / NRRL 3357 / JCM 12722 / SRRC 167)	Pathogen	Aspergillus flavus (species), Aspergillus subgen. Circumdati (subgenus), Aspergillus (genus), Aspergillaceae (family), Eurotiales (order), Eurotiomycetidae (subclass), Eurotiomycetes (class), leotiomyceta (no rank), Pezizomycotina (subphylum), saccharomyceta (no rank), Ascomycota (phylum), Dikarya (subkingdom), Fungi (kingdom), Opisthokonta (no rank), Eukaryota (superkingdom), cellular organisms …
B8N8D3_ASPFN	AFLA_107270	A0A0L1JFI7	4e-14	no	RTARACDACYKRKIKCDAAVPQCNWCSHHNIPCTFERVIHKRRKD	C6 transcription factor, putative	Aspergillus flavus (strain ATCC 200026 / FGSC A1120 / IAM 13836 / NRRL 3357 / JCM 12722 / SRRC 167)	Pathogen	Aspergillus flavus (species), Aspergillus subgen. Circumdati (subgenus), Aspergillus (genus), Aspergillaceae (family), Eurotiales (order), Eurotiomycetidae (subclass), Eurotiomycetes (class), leotiomyceta (no rank), Pezizomycotina (subphylum), saccharomyceta (no rank), Ascomycota (phylum), Dikarya (subkingdom), Fungi (kingdom), Opisthokonta (no rank), Eukaryota (superkingdom), cellular organisms …
B8N8F6_ASPFN	AFLA_107500	A0A1L9RY37	6.2e-16	no	RHQACSRCHSLKVRCSGHLPACLRCQKRGRECVYSSSPLKTSSP	Fungal_trans domain-containing protein	Aspergillus flavus (strain ATCC 200026 / FGSC A1120 / IAM 13836 / NRRL 3357 / JCM 12722 / SRRC 167)	Pathogen	Aspergillus flavus (species), Aspergillus subgen. Circumdati (subgenus), Aspergillus (genus), Aspergillaceae (family), Eurotiales (order), Eurotiomycetidae (subclass), Eurotiomycetes (class), leotiomyceta (no rank), Pezizomycotina (subphylum), saccharomyceta (no rank), Ascomycota (phylum), Dikarya (subkingdom), Fungi (kingdom), Opisthokonta (no rank), Eukaryota (superkingdom), cellular organisms …
B8N8I2_ASPFN	AFLA_107760	Q2UHP6	3.9e-15	no	RLSMACNICRQRKVKCDAEYPKCRNCRVRNQICVTTDPQRPGVPG	Fungal_trans domain-containing protein	Aspergillus flavus (strain ATCC 200026 / FGSC A1120 / IAM 13836 / NRRL 3357 / JCM 12722 / SRRC 167)	Pathogen	Aspergillus flavus (species), Aspergillus subgen. Circumdati (subgenus), Aspergillus (genus), Aspergillaceae (family), Eurotiales (order), Eurotiomycetidae (subclass), Eurotiomycetes (class), leotiomyceta (no rank), Pezizomycotina (subphylum), saccharomyceta (no rank), Ascomycota (phylum), Dikarya (subkingdom), Fungi (kingdom), Opisthokonta (no rank), Eukaryota (superkingdom), cellular organisms …
B8N8M4_ASPFN	AFLA_108180	A0A0L1IWK8	1.7e-14	no	PRANGACDVCRRMKIKCDRTYPCSHCRESFNDCVFSQRRRRKRS	Fungal_trans domain-containing protein	Aspergillus flavus (strain ATCC 200026 / FGSC A1120 / IAM 13836 / NRRL 3357 / JCM 12722 / SRRC 167)	Pathogen	Aspergillus flavus (species), Aspergillus subgen. Circumdati (subgenus), Aspergillus (genus), Aspergillaceae (family), Eurotiales (order), Eurotiomycetidae (subclass), Eurotiomycetes (class), leotiomyceta (no rank), Pezizomycotina (subphylum), saccharomyceta (no rank), Ascomycota (phylum), Dikarya (subkingdom), Fungi (kingdom), Opisthokonta (no rank), Eukaryota (superkingdom), cellular organisms …
B8N928_ASPFN	AFLA_109740	I8TL16	4.5e-15	no	KRVGVACNTCRSLKIRCDGVRPHCGTCQRRRDRCIFKDDDLRLPR	Fungal_trans domain-containing protein	Aspergillus flavus (strain ATCC 200026 / FGSC A1120 / IAM 13836 / NRRL 3357 / JCM 12722 / SRRC 167)	Pathogen	Aspergillus flavus (species), Aspergillus subgen. Circumdati (subgenus), Aspergillus (genus), Aspergillaceae (family), Eurotiales (order), Eurotiomycetidae (subclass), Eurotiomycetes (class), leotiomyceta (no rank), Pezizomycotina (subphylum), saccharomyceta (no rank), Ascomycota (phylum), Dikarya (subkingdom), Fungi (kingdom), Opisthokonta (no rank), Eukaryota (superkingdom), cellular organisms …
B8NWZ0_ASPFN	AFLA_121770	A0A1L9V562	1.1e-12	no	PKYISCTRCQSKKTRCNRVQPRCDKCEAINAECIYVPRKARAKKQ	Fungal_trans domain-containing protein	Aspergillus flavus (strain ATCC 200026 / FGSC A1120 / IAM 13836 / NRRL 3357 / JCM 12722 / SRRC 167)	Pathogen	Aspergillus flavus (species), Aspergillus subgen. Circumdati (subgenus), Aspergillus (genus), Aspergillaceae (family), Eurotiales (order), Eurotiomycetidae (subclass), Eurotiomycetes (class), leotiomyceta (no rank), Pezizomycotina (subphylum), saccharomyceta (no rank), Ascomycota (phylum), Dikarya (subkingdom), Fungi (kingdom), Opisthokonta (no rank), Eukaryota (superkingdom), cellular organisms …
B8NN09_ASPFN	AFLA_123540	A0A0G4PB90	3.9e-14	no	KRTRQACGPCRRKKARCPGEKPTCSLCQRLGQRCSYGPQAAPSRA	Fungal_trans domain-containing protein	Aspergillus flavus (strain ATCC 200026 / FGSC A1120 / IAM 13836 / NRRL 3357 / JCM 12722 / SRRC 167)	Pathogen	Aspergillus flavus (species), Aspergillus subgen. Circumdati (subgenus), Aspergillus (genus), Aspergillaceae (family), Eurotiales (order), Eurotiomycetidae (subclass), Eurotiomycetes (class), leotiomyceta (no rank), Pezizomycotina (subphylum), saccharomyceta (no rank), Ascomycota (phylum), Dikarya (subkingdom), Fungi (kingdom), Opisthokonta (no rank), Eukaryota (superkingdom), cellular organisms …
B8NME1_ASPFN	AFLA_123770	A0A100I5U2	4.3e-13	no	KVSSACQRCRRQKLKCDTTRPCTLCRRAAVDCQPVTPARWRVYQ	Fungal specific transcription factor, putative	Aspergillus flavus (strain ATCC 200026 / FGSC A1120 / IAM 13836 / NRRL 3357 / JCM 12722 / SRRC 167)	Pathogen	Aspergillus flavus (species), Aspergillus subgen. Circumdati (subgenus), Aspergillus (genus), Aspergillaceae (family), Eurotiales (order), Eurotiomycetidae (subclass), Eurotiomycetes (class), leotiomyceta (no rank), Pezizomycotina (subphylum), saccharomyceta (no rank), Ascomycota (phylum), Dikarya (subkingdom), Fungi (kingdom), Opisthokonta (no rank), Eukaryota (superkingdom), cellular organisms …
B8NMI1_ASPFN	AFLA_124170	A0A0D2CZ45	2.4e-14	no	LSSRSCLCCHRRKVRCDRGVPCTNCARAGWTCVYPSKDTDGSRR	Fungal_trans domain-containing protein	Aspergillus flavus (strain ATCC 200026 / FGSC A1120 / IAM 13836 / NRRL 3357 / JCM 12722 / SRRC 167)	Pathogen	Aspergillus flavus (species), Aspergillus subgen. Circumdati (subgenus), Aspergillus (genus), Aspergillaceae (family), Eurotiales (order), Eurotiomycetidae (subclass), Eurotiomycetes (class), leotiomyceta (no rank), Pezizomycotina (subphylum), saccharomyceta (no rank), Ascomycota (phylum), Dikarya (subkingdom), Fungi (kingdom), Opisthokonta (no rank), Eukaryota (superkingdom), cellular organisms …
B8NMJ3_ASPFN	AFLA_124290	A0A0U1M2Z9	2.3e-15	no	RAAIACEYCRQKKLKCSNGRPKCQHCHARGKECTYIEQAKIPrPS	Fungal_trans domain-containing protein	Aspergillus flavus (strain ATCC 200026 / FGSC A1120 / IAM 13836 / NRRL 3357 / JCM 12722 / SRRC 167)	Pathogen	Aspergillus flavus (species), Aspergillus subgen. Circumdati (subgenus), Aspergillus (genus), Aspergillaceae (family), Eurotiales (order), Eurotiomycetidae (subclass), Eurotiomycetes (class), leotiomyceta (no rank), Pezizomycotina (subphylum), saccharomyceta (no rank), Ascomycota (phylum), Dikarya (subkingdom), Fungi (kingdom), Opisthokonta (no rank), Eukaryota (superkingdom), cellular organisms …
B8NNZ5_ASPFN	AFLA_126010	A0A0F7VGU6	2.3e-14	no	KNVTTACLACRDSKIKCDGTKPICSHCKVKGRSCHYQLGVDKRK	Fungal_trans domain-containing protein	Aspergillus flavus (strain ATCC 200026 / FGSC A1120 / IAM 13836 / NRRL 3357 / JCM 12722 / SRRC 167)	Pathogen	Aspergillus flavus (species), Aspergillus subgen. Circumdati (subgenus), Aspergillus (genus), Aspergillaceae (family), Eurotiales (order), Eurotiomycetidae (subclass), Eurotiomycetes (class), leotiomyceta (no rank), Pezizomycotina (subphylum), saccharomyceta (no rank), Ascomycota (phylum), Dikarya (subkingdom), Fungi (kingdom), Opisthokonta (no rank), Eukaryota (superkingdom), cellular organisms …
B8NNP5_ASPFN	AFLA_129460	A0A0S7DQU3	3.2e-13	no	RKIVaCQRCHDHKIKCSGDQPCSKCRQVGCADKCEYTPRDRQVKVS	C6 transcription factor, putative	Aspergillus flavus (strain ATCC 200026 / FGSC A1120 / IAM 13836 / NRRL 3357 / JCM 12722 / SRRC 167)	Pathogen	Aspergillus flavus (species), Aspergillus subgen. Circumdati (subgenus), Aspergillus (genus), Aspergillaceae (family), Eurotiales (order), Eurotiomycetidae (subclass), Eurotiomycetes (class), leotiomyceta (no rank), Pezizomycotina (subphylum), saccharomyceta (no rank), Ascomycota (phylum), Dikarya (subkingdom), Fungi (kingdom), Opisthokonta (no rank), Eukaryota (superkingdom), cellular organisms …
B8NG18_ASPFN	AFLA_131790	A0A1L9RTL4	8.6e-14	no	RRRHACQSCTSMKLRCDGLRPCSSCQKRNLHCDNERNQVKEP	Fungal_trans domain-containing protein	Aspergillus flavus (strain ATCC 200026 / FGSC A1120 / IAM 13836 / NRRL 3357 / JCM 12722 / SRRC 167)	Pathogen	Aspergillus flavus (species), Aspergillus subgen. Circumdati (subgenus), Aspergillus (genus), Aspergillaceae (family), Eurotiales (order), Eurotiomycetidae (subclass), Eurotiomycetes (class), leotiomyceta (no rank), Pezizomycotina (subphylum), saccharomyceta (no rank), Ascomycota (phylum), Dikarya (subkingdom), Fungi (kingdom), Opisthokonta (no rank), Eukaryota (superkingdom), cellular organisms …
B8NFQ9_ASPFN	AFLA_133380	Q2UEH7	1.8e-16	no	ACDMCRKKKIKCDGKMPKCSHCINYKTDCVFTQVEKKRNPP	Fungal specific transcription factor, putative	Aspergillus flavus (strain ATCC 200026 / FGSC A1120 / IAM 13836 / NRRL 3357 / JCM 12722 / SRRC 167)	Pathogen	Aspergillus flavus (species), Aspergillus subgen. Circumdati (subgenus), Aspergillus (genus), Aspergillaceae (family), Eurotiales (order), Eurotiomycetidae (subclass), Eurotiomycetes (class), leotiomyceta (no rank), Pezizomycotina (subphylum), saccharomyceta (no rank), Ascomycota (phylum), Dikarya (subkingdom), Fungi (kingdom), Opisthokonta (no rank), Eukaryota (superkingdom), cellular organisms …
B8NHB1_ASPFN	AFLA_135160	A0A0L1IXT7	4.2e-14	no	HRSAVACQHCRQRKVRCSFTVTGVPCIGCTQDGTECIIPQGKAQTT	Fungal_trans domain-containing protein	Aspergillus flavus (strain ATCC 200026 / FGSC A1120 / IAM 13836 / NRRL 3357 / JCM 12722 / SRRC 167)	Pathogen	Aspergillus flavus (species), Aspergillus subgen. Circumdati (subgenus), Aspergillus (genus), Aspergillaceae (family), Eurotiales (order), Eurotiomycetidae (subclass), Eurotiomycetes (class), leotiomyceta (no rank), Pezizomycotina (subphylum), saccharomyceta (no rank), Ascomycota (phylum), Dikarya (subkingdom), Fungi (kingdom), Opisthokonta (no rank), Eukaryota (superkingdom), cellular organisms …
B8NGM0_ASPFN	AFLA_136470	A0A0L1INY2	2.3e-12	no	SHKIPACDRCRRFKRRCTGGTPEQPCVLCSLQEVPCIISSSPKLSS	Fungal_trans domain-containing protein	Aspergillus flavus (strain ATCC 200026 / FGSC A1120 / IAM 13836 / NRRL 3357 / JCM 12722 / SRRC 167)	Pathogen	Aspergillus flavus (species), Aspergillus subgen. Circumdati (subgenus), Aspergillus (genus), Aspergillaceae (family), Eurotiales (order), Eurotiomycetidae (subclass), Eurotiomycetes (class), leotiomyceta (no rank), Pezizomycotina (subphylum), saccharomyceta (no rank), Ascomycota (phylum), Dikarya (subkingdom), Fungi (kingdom), Opisthokonta (no rank), Eukaryota (superkingdom), cellular organisms …
B8NHJ4_ASPFN	AFLA_136880	I8A2C0	5e-12	no	ACDACSKRKVQCDRATPKCNWCYHHDIPCLYTRN	C6 transcription factor, putative	Aspergillus flavus (strain ATCC 200026 / FGSC A1120 / IAM 13836 / NRRL 3357 / JCM 12722 / SRRC 167)	Pathogen	Aspergillus flavus (species), Aspergillus subgen. Circumdati (subgenus), Aspergillus (genus), Aspergillaceae (family), Eurotiales (order), Eurotiomycetidae (subclass), Eurotiomycetes (class), leotiomyceta (no rank), Pezizomycotina (subphylum), saccharomyceta (no rank), Ascomycota (phylum), Dikarya (subkingdom), Fungi (kingdom), Opisthokonta (no rank), Eukaryota (superkingdom), cellular organisms …
B8NGX9_ASPFN	AFLA_138470	A0A0G4P2E0	2.2e-10	no	RICKSCEQCRARKVRCIvSREDPSRCTHCIKRDERCEFKQARRRFKQR	Fungal_trans domain-containing protein	Aspergillus flavus (strain ATCC 200026 / FGSC A1120 / IAM 13836 / NRRL 3357 / JCM 12722 / SRRC 167)	Pathogen	Aspergillus flavus (species), Aspergillus subgen. Circumdati (subgenus), Aspergillus (genus), Aspergillaceae (family), Eurotiales (order), Eurotiomycetidae (subclass), Eurotiomycetes (class), leotiomyceta (no rank), Pezizomycotina (subphylum), saccharomyceta (no rank), Ascomycota (phylum), Dikarya (subkingdom), Fungi (kingdom), Opisthokonta (no rank), Eukaryota (superkingdom), cellular organisms …
A0A0J5SNH9_ASPFM	Y699_00193	B0Y2A8	1.4e-14	no	RRTYACDSCSIRKIKCDRATPQCDWCYHHNIPCTFTRNRDSSRSC	C6 transcription factor, putative	Aspergillus fumigatus Z5	Pathogen	Neosartorya fumigata (species), Aspergillus subgen. Fumigati (subgenus), Aspergillus (genus), Aspergillaceae (family), Eurotiales (order), Eurotiomycetidae (subclass), Eurotiomycetes (class), leotiomyceta (no rank), Pezizomycotina (subphylum), saccharomyceta (no rank), Ascomycota (phylum), Dikarya (subkingdom), Fungi (kingdom), Opisthokonta (no rank), Eukaryota (superkingdom), cellular organisms …
A0A0J5PU39_ASPFM	Y699_01339	Q4WY88	4e-13	no	GTLQSCEPCRKAKLRCDHGRPVCGRCTAKNIASRCFYHPAPMTKRTV	C6 transcription factor, putative	Aspergillus fumigatus Z5	Pathogen	Neosartorya fumigata (species), Aspergillus subgen. Fumigati (subgenus), Aspergillus (genus), Aspergillaceae (family), Eurotiales (order), Eurotiomycetidae (subclass), Eurotiomycetes (class), leotiomyceta (no rank), Pezizomycotina (subphylum), saccharomyceta (no rank), Ascomycota (phylum), Dikarya (subkingdom), Fungi (kingdom), Opisthokonta (no rank), Eukaryota (superkingdom), cellular organisms …
A0A0J5Q1I0_ASPFM	Y699_02095	A0A0K8LJ50	1e-15	no	KTVLACATCRRRKVKCDGLRPaCGRCLRTRDLQEPCTYISASARRRSP	C6 transcription factor	Aspergillus fumigatus Z5	Pathogen	Neosartorya fumigata (species), Aspergillus subgen. Fumigati (subgenus), Aspergillus (genus), Aspergillaceae (family), Eurotiales (order), Eurotiomycetidae (subclass), Eurotiomycetes (class), leotiomyceta (no rank), Pezizomycotina (subphylum), saccharomyceta (no rank), Ascomycota (phylum), Dikarya (subkingdom), Fungi (kingdom), Opisthokonta (no rank), Eukaryota (superkingdom), cellular organisms …
A0A0J5Q1Y3_ASPFM	Y699_02245	Q4WZN6	4.2e-14	no	KPQLSCNSCRRRkSKCDRQKPCSFCSARGQVCTYAENHPTTGSP	Fungal specific transcription factor	Aspergillus fumigatus Z5	Pathogen	Neosartorya fumigata (species), Aspergillus subgen. Fumigati (subgenus), Aspergillus (genus), Aspergillaceae (family), Eurotiales (order), Eurotiomycetidae (subclass), Eurotiomycetes (class), leotiomyceta (no rank), Pezizomycotina (subphylum), saccharomyceta (no rank), Ascomycota (phylum), Dikarya (subkingdom), Fungi (kingdom), Opisthokonta (no rank), Eukaryota (superkingdom), cellular organisms …
A0A0J5PMT7_ASPFM	Y699_03133	B0XUF3	5.2e-13	no	KKRQPVKRACNECRQQKVRCDVIQDPWTDCSRCRRLKLECKIESNFKR	C6 transcription factor (Leu3)	Aspergillus fumigatus Z5	Pathogen	Neosartorya fumigata (species), Aspergillus subgen. Fumigati (subgenus), Aspergillus (genus), Aspergillaceae (family), Eurotiales (order), Eurotiomycetidae (subclass), Eurotiomycetes (class), leotiomyceta (no rank), Pezizomycotina (subphylum), saccharomyceta (no rank), Ascomycota (phylum), Dikarya (subkingdom), Fungi (kingdom), Opisthokonta (no rank), Eukaryota (superkingdom), cellular organisms …
A0A0J5PR40_ASPFM	Y699_03495	I8ACB7	3.2e-14	no	RASRACETCHARKVRCDAASLGVPCTNCVAFSIECKIPTPKRKKQQS	C6 transcription factor Ctf1A	Aspergillus fumigatus Z5	Pathogen	Neosartorya fumigata (species), Aspergillus subgen. Fumigati (subgenus), Aspergillus (genus), Aspergillaceae (family), Eurotiales (order), Eurotiomycetidae (subclass), Eurotiomycetes (class), leotiomyceta (no rank), Pezizomycotina (subphylum), saccharomyceta (no rank), Ascomycota (phylum), Dikarya (subkingdom), Fungi (kingdom), Opisthokonta (no rank), Eukaryota (superkingdom), cellular organisms …
A0A0J5PSF8_ASPFM	Y699_03649	A0A1L9U228	9.7e-17	no	RRVALACDVCRTRKSRCDGIRPQCSMCKDLGFECAYTPPVTATNV	C6 transcription factor	Aspergillus fumigatus Z5	Pathogen	Neosartorya fumigata (species), Aspergillus subgen. Fumigati (subgenus), Aspergillus (genus), Aspergillaceae (family), Eurotiales (order), Eurotiomycetidae (subclass), Eurotiomycetes (class), leotiomyceta (no rank), Pezizomycotina (subphylum), saccharomyceta (no rank), Ascomycota (phylum), Dikarya (subkingdom), Fungi (kingdom), Opisthokonta (no rank), Eukaryota (superkingdom), cellular organisms …
A0A0J5Q3K2_ASPFM	Y699_04288	I8AAG7	1.8e-13	no	QHYSVCDACHSRKVRCDRNDPCGNCQDQRTACTRRRSRRRLPKK	Fungal_trans domain-containing protein	Aspergillus fumigatus Z5	Pathogen	Neosartorya fumigata (species), Aspergillus subgen. Fumigati (subgenus), Aspergillus (genus), Aspergillaceae (family), Eurotiales (order), Eurotiomycetidae (subclass), Eurotiomycetes (class), leotiomyceta (no rank), Pezizomycotina (subphylum), saccharomyceta (no rank), Ascomycota (phylum), Dikarya (subkingdom), Fungi (kingdom), Opisthokonta (no rank), Eukaryota (superkingdom), cellular organisms …
A0A0J5Q3M7_ASPFM	Y699_04346	B0Y8Q3	1.3e-13	no	RASRACISCREQKAKCTGGSPCERCRELKIECVFVANKNEKIAr	C6 transcription factor	Aspergillus fumigatus Z5	Pathogen	Neosartorya fumigata (species), Aspergillus subgen. Fumigati (subgenus), Aspergillus (genus), Aspergillaceae (family), Eurotiales (order), Eurotiomycetidae (subclass), Eurotiomycetes (class), leotiomyceta (no rank), Pezizomycotina (subphylum), saccharomyceta (no rank), Ascomycota (phylum), Dikarya (subkingdom), Fungi (kingdom), Opisthokonta (no rank), Eukaryota (superkingdom), cellular organisms …
A0A0J5Q3R3_ASPFM	Y699_04888	B0Y4L4	2.4e-15	no	HTLTACTRCRQRKSRCDPGIPRCSPCERSNAKCVYYDSARKCTIP	C6 transcription factor, putative	Aspergillus fumigatus Z5	Pathogen	Neosartorya fumigata (species), Aspergillus subgen. Fumigati (subgenus), Aspergillus (genus), Aspergillaceae (family), Eurotiales (order), Eurotiomycetidae (subclass), Eurotiomycetes (class), leotiomyceta (no rank), Pezizomycotina (subphylum), saccharomyceta (no rank), Ascomycota (phylum), Dikarya (subkingdom), Fungi (kingdom), Opisthokonta (no rank), Eukaryota (superkingdom), cellular organisms …
A0A0J5Q0P5_ASPFM	Y699_04921	V5I687	3.2e-15	no	NGKPASCEPCRKDKVRCDHGHPACSRCLRRGSTSQCFYHPAPLTRA	Fungal specific transcription factor	Aspergillus fumigatus Z5	Pathogen	Neosartorya fumigata (species), Aspergillus subgen. Fumigati (subgenus), Aspergillus (genus), Aspergillaceae (family), Eurotiales (order), Eurotiomycetidae (subclass), Eurotiomycetes (class), leotiomyceta (no rank), Pezizomycotina (subphylum), saccharomyceta (no rank), Ascomycota (phylum), Dikarya (subkingdom), Fungi (kingdom), Opisthokonta (no rank), Eukaryota (superkingdom), cellular organisms …
A0A0J5PLD0_ASPFM	Y699_05420	A1DBT8	2.6e-14	no	RCIRTACAACREQKARCSEHRPCLRCISFGITCTTLESKHESRQ	Fungal specific transcription factor, putative	Aspergillus fumigatus Z5	Pathogen	Neosartorya fumigata (species), Aspergillus subgen. Fumigati (subgenus), Aspergillus (genus), Aspergillaceae (family), Eurotiales (order), Eurotiomycetidae (subclass), Eurotiomycetes (class), leotiomyceta (no rank), Pezizomycotina (subphylum), saccharomyceta (no rank), Ascomycota (phylum), Dikarya (subkingdom), Fungi (kingdom), Opisthokonta (no rank), Eukaryota (superkingdom), cellular organisms …
A0A0J5SHN9_ASPFM	Y699_05487	Q4WC19	1.7e-14	no	GVQTSCEPCRRSKLRCDYSTPTCQRCLRRGKSDVCVYHPSPMTRSWY	C6 transcription factor	Aspergillus fumigatus Z5	Pathogen	Neosartorya fumigata (species), Aspergillus subgen. Fumigati (subgenus), Aspergillus (genus), Aspergillaceae (family), Eurotiales (order), Eurotiomycetidae (subclass), Eurotiomycetes (class), leotiomyceta (no rank), Pezizomycotina (subphylum), saccharomyceta (no rank), Ascomycota (phylum), Dikarya (subkingdom), Fungi (kingdom), Opisthokonta (no rank), Eukaryota (superkingdom), cellular organisms …
A0A0J5PNE6_ASPFM	Y699_05684	A1DB05	1.1e-12	no	KvMRACNGCRKRKIKCDAATTNTWPCSACTRLKLVCVPPTIGQDSDFQ	C6 finger domain-containing protein, putative	Aspergillus fumigatus Z5	Pathogen	Neosartorya fumigata (species), Aspergillus subgen. Fumigati (subgenus), Aspergillus (genus), Aspergillaceae (family), Eurotiales (order), Eurotiomycetidae (subclass), Eurotiomycetes (class), leotiomyceta (no rank), Pezizomycotina (subphylum), saccharomyceta (no rank), Ascomycota (phylum), Dikarya (subkingdom), Fungi (kingdom), Opisthokonta (no rank), Eukaryota (superkingdom), cellular organisms …
A0A0J5PJL3_ASPFM	Y699_05711	Q4WBL4	7.9e-14	no	RVSRACDRCRSKKDKCDGLRPSCSACRASGQTCSYDPHAKKRGLP	C6 transcription factor	Aspergillus fumigatus Z5	Pathogen	Neosartorya fumigata (species), Aspergillus subgen. Fumigati (subgenus), Aspergillus (genus), Aspergillaceae (family), Eurotiales (order), Eurotiomycetidae (subclass), Eurotiomycetes (class), leotiomyceta (no rank), Pezizomycotina (subphylum), saccharomyceta (no rank), Ascomycota (phylum), Dikarya (subkingdom), Fungi (kingdom), Opisthokonta (no rank), Eukaryota (superkingdom), cellular organisms …
A0A0J5PKC3_ASPFM	Y699_05778	B0YAG8	6.6e-13	no	RVSSACERCRRHKTRCDPFRPCSLCARAKVDCQPLPASQTRRDS	C6 transcription factor, putative	Aspergillus fumigatus Z5	Pathogen	Neosartorya fumigata (species), Aspergillus subgen. Fumigati (subgenus), Aspergillus (genus), Aspergillaceae (family), Eurotiales (order), Eurotiomycetidae (subclass), Eurotiomycetes (class), leotiomyceta (no rank), Pezizomycotina (subphylum), saccharomyceta (no rank), Ascomycota (phylum), Dikarya (subkingdom), Fungi (kingdom), Opisthokonta (no rank), Eukaryota (superkingdom), cellular organisms …
A0A0J5PKI8_ASPFM	Y699_05863	A0A150VD55	2.7e-08	no	SVSPISCELCRQRKCKASRNSPFCSQCLADPSKCNYPESGKR	C6 transcription factor, putative	Aspergillus fumigatus Z5	Pathogen	Neosartorya fumigata (species), Aspergillus subgen. Fumigati (subgenus), Aspergillus (genus), Aspergillaceae (family), Eurotiales (order), Eurotiomycetidae (subclass), Eurotiomycetes (class), leotiomyceta (no rank), Pezizomycotina (subphylum), saccharomyceta (no rank), Ascomycota (phylum), Dikarya (subkingdom), Fungi (kingdom), Opisthokonta (no rank), Eukaryota (superkingdom), cellular organisms …
A0A0J5PDA1_ASPFM	Y699_06022	A0A0K8L6D2	1.2e-12	no	RESMNCKSCRKRKIKCNRMRPSCEACKVFQCPCIYdAVPKKRGPK	Fungal specific transcription factor	Aspergillus fumigatus Z5	Pathogen	Neosartorya fumigata (species), Aspergillus subgen. Fumigati (subgenus), Aspergillus (genus), Aspergillaceae (family), Eurotiales (order), Eurotiomycetidae (subclass), Eurotiomycetes (class), leotiomyceta (no rank), Pezizomycotina (subphylum), saccharomyceta (no rank), Ascomycota (phylum), Dikarya (subkingdom), Fungi (kingdom), Opisthokonta (no rank), Eukaryota (superkingdom), cellular organisms …
A0A0J5SK69_ASPFM	Y699_07158	A1CC34	6.9e-11	no	KTKVACKVCNLRRVKCDRTEDRACVNCRVAGQECEPIISRRGKYR	Fungal specific transcription factor, putative	Aspergillus fumigatus Z5	Pathogen	Neosartorya fumigata (species), Aspergillus subgen. Fumigati (subgenus), Aspergillus (genus), Aspergillaceae (family), Eurotiales (order), Eurotiomycetidae (subclass), Eurotiomycetes (class), leotiomyceta (no rank), Pezizomycotina (subphylum), saccharomyceta (no rank), Ascomycota (phylum), Dikarya (subkingdom), Fungi (kingdom), Opisthokonta (no rank), Eukaryota (superkingdom), cellular organisms …
A0A0J5PLV7_ASPFM	Y699_07162	A0A0G4PB90	7.2e-14	no	QRTRQACGPCRRKKARCPGEKPTCSLCQRLGQRCSYGPHARVR	Fungal specific transcription factor, putative	Aspergillus fumigatus Z5	Pathogen	Neosartorya fumigata (species), Aspergillus subgen. Fumigati (subgenus), Aspergillus (genus), Aspergillaceae (family), Eurotiales (order), Eurotiomycetidae (subclass), Eurotiomycetes (class), leotiomyceta (no rank), Pezizomycotina (subphylum), saccharomyceta (no rank), Ascomycota (phylum), Dikarya (subkingdom), Fungi (kingdom), Opisthokonta (no rank), Eukaryota (superkingdom), cellular organisms …
A0A0J5PIK1_ASPFM	Y699_07199	A1CM34	2.5e-15	no	PVRRACDNCRLRKIKCSLSQPCRACSQMGFECLFLQPQKKRGPT	C6 transcription factor	Aspergillus fumigatus Z5	Pathogen	Neosartorya fumigata (species), Aspergillus subgen. Fumigati (subgenus), Aspergillus (genus), Aspergillaceae (family), Eurotiales (order), Eurotiomycetidae (subclass), Eurotiomycetes (class), leotiomyceta (no rank), Pezizomycotina (subphylum), saccharomyceta (no rank), Ascomycota (phylum), Dikarya (subkingdom), Fungi (kingdom), Opisthokonta (no rank), Eukaryota (superkingdom), cellular organisms …
A0A0J5PJG6_ASPFM	Y699_07514	Q4WCN3	1.8e-13	no	HKTTACKACKRKKLKCRGDPPCQHCVSHGVKCEVDAMSDMRRKN	C6 transcription factor	Aspergillus fumigatus Z5	Pathogen	Neosartorya fumigata (species), Aspergillus subgen. Fumigati (subgenus), Aspergillus (genus), Aspergillaceae (family), Eurotiales (order), Eurotiomycetidae (subclass), Eurotiomycetes (class), leotiomyceta (no rank), Pezizomycotina (subphylum), saccharomyceta (no rank), Ascomycota (phylum), Dikarya (subkingdom), Fungi (kingdom), Opisthokonta (no rank), Eukaryota (superkingdom), cellular organisms …
A0A0J5PG63_ASPFM	Y699_07586	B0YE03	1.8e-15	no	KVSRACDTCKKKKIRCDGTIPCTNCTKRKVSCAYDMKYGRGRPP	C6 transcription factor	Aspergillus fumigatus Z5	Pathogen	Neosartorya fumigata (species), Aspergillus subgen. Fumigati (subgenus), Aspergillus (genus), Aspergillaceae (family), Eurotiales (order), Eurotiomycetidae (subclass), Eurotiomycetes (class), leotiomyceta (no rank), Pezizomycotina (subphylum), saccharomyceta (no rank), Ascomycota (phylum), Dikarya (subkingdom), Fungi (kingdom), Opisthokonta (no rank), Eukaryota (superkingdom), cellular organisms …
A0A0J5PPJ4_ASPFM	Y699_07873	Q4WFH9	1.1e-13	no	ACLRCQQKKKQCDGNIPQCTSCADHHLTCTYQGVRRRGRGK	C6 transcription factor, putative	Aspergillus fumigatus Z5	Pathogen	Neosartorya fumigata (species), Aspergillus subgen. Fumigati (subgenus), Aspergillus (genus), Aspergillaceae (family), Eurotiales (order), Eurotiomycetidae (subclass), Eurotiomycetes (class), leotiomyceta (no rank), Pezizomycotina (subphylum), saccharomyceta (no rank), Ascomycota (phylum), Dikarya (subkingdom), Fungi (kingdom), Opisthokonta (no rank), Eukaryota (superkingdom), cellular organisms …
A0A0J5PTP5_ASPFM	Y699_07901	B0XWL6	3.3e-17	no	KVSTACQACRLRKAKCDGGRPaCIRCLRRGKACTYSINSNAVERQ	Fungal specific transcription factor, putative	Aspergillus fumigatus Z5	Pathogen	Neosartorya fumigata (species), Aspergillus subgen. Fumigati (subgenus), Aspergillus (genus), Aspergillaceae (family), Eurotiales (order), Eurotiomycetidae (subclass), Eurotiomycetes (class), leotiomyceta (no rank), Pezizomycotina (subphylum), saccharomyceta (no rank), Ascomycota (phylum), Dikarya (subkingdom), Fungi (kingdom), Opisthokonta (no rank), Eukaryota (superkingdom), cellular organisms …
A0A0J5PQH3_ASPFM	Y699_07970	B8M1Q9	1.5e-14	no	RSHQACENCrRKKTRCPGERPECSSCTRLQQTCQYSKSHDSSRRS	Fungal_trans domain-containing protein	Aspergillus fumigatus Z5	Pathogen	Neosartorya fumigata (species), Aspergillus subgen. Fumigati (subgenus), Aspergillus (genus), Aspergillaceae (family), Eurotiales (order), Eurotiomycetidae (subclass), Eurotiomycetes (class), leotiomyceta (no rank), Pezizomycotina (subphylum), saccharomyceta (no rank), Ascomycota (phylum), Dikarya (subkingdom), Fungi (kingdom), Opisthokonta (no rank), Eukaryota (superkingdom), cellular organisms …
A0A0J5PWK0_ASPFM	Y699_08123	A0A1L9RKE6	3.9e-10	no	DRTTPCCVCRLKRRGCDRQRPSCGRCREAGLSEECSYRP	Fungal specific transcription factor, putative	Aspergillus fumigatus Z5	Pathogen	Neosartorya fumigata (species), Aspergillus subgen. Fumigati (subgenus), Aspergillus (genus), Aspergillaceae (family), Eurotiales (order), Eurotiomycetidae (subclass), Eurotiomycetes (class), leotiomyceta (no rank), Pezizomycotina (subphylum), saccharomyceta (no rank), Ascomycota (phylum), Dikarya (subkingdom), Fungi (kingdom), Opisthokonta (no rank), Eukaryota (superkingdom), cellular organisms …
A0A0J5PWB0_ASPFM	Y699_08171	B0XQL9	7.4e-14	no	IIRKSFACDECKRRKIRCTGGDNCTNCVRDAKPCRYSSPSQKLL	C6 transcription factor	Aspergillus fumigatus Z5	Pathogen	Neosartorya fumigata (species), Aspergillus subgen. Fumigati (subgenus), Aspergillus (genus), Aspergillaceae (family), Eurotiales (order), Eurotiomycetidae (subclass), Eurotiomycetes (class), leotiomyceta (no rank), Pezizomycotina (subphylum), saccharomyceta (no rank), Ascomycota (phylum), Dikarya (subkingdom), Fungi (kingdom), Opisthokonta (no rank), Eukaryota (superkingdom), cellular organisms …
A0A0J5PI82_ASPFM	Y699_08499	A0A1L9N6G1	6.5e-14	no	PVRVACLScRASRIRCDGQSACSNCIAKGHTCVYIPSRRGGPR	Fungal_trans domain-containing protein	Aspergillus fumigatus Z5	Pathogen	Neosartorya fumigata (species), Aspergillus subgen. Fumigati (subgenus), Aspergillus (genus), Aspergillaceae (family), Eurotiales (order), Eurotiomycetidae (subclass), Eurotiomycetes (class), leotiomyceta (no rank), Pezizomycotina (subphylum), saccharomyceta (no rank), Ascomycota (phylum), Dikarya (subkingdom), Fungi (kingdom), Opisthokonta (no rank), Eukaryota (superkingdom), cellular organisms …
A0A0J5PIU1_ASPFM	Y699_08669	A0A135S860	3.9e-13	no	RVPTACQRCRRQKLKCDVNRPCTLCSRAGADCLPATTSRWRVYQ	Fungal specific transcription factor	Aspergillus fumigatus Z5	Pathogen	Neosartorya fumigata (species), Aspergillus subgen. Fumigati (subgenus), Aspergillus (genus), Aspergillaceae (family), Eurotiales (order), Eurotiomycetidae (subclass), Eurotiomycetes (class), leotiomyceta (no rank), Pezizomycotina (subphylum), saccharomyceta (no rank), Ascomycota (phylum), Dikarya (subkingdom), Fungi (kingdom), Opisthokonta (no rank), Eukaryota (superkingdom), cellular organisms …
A0A0J5SGX6_ASPFM	Y699_08673	A1DD00	2.3e-11	no	RLSVSCDSCrQAKVKCIHEGQPPCRRCQRAKLTDCQLTDTYSSPSRRSKRT	Fungal specific transcription factor, putative	Aspergillus fumigatus Z5	Pathogen	Neosartorya fumigata (species), Aspergillus subgen. Fumigati (subgenus), Aspergillus (genus), Aspergillaceae (family), Eurotiales (order), Eurotiomycetidae (subclass), Eurotiomycetes (class), leotiomyceta (no rank), Pezizomycotina (subphylum), saccharomyceta (no rank), Ascomycota (phylum), Dikarya (subkingdom), Fungi (kingdom), Opisthokonta (no rank), Eukaryota (superkingdom), cellular organisms …
A0A0J5PI67_ASPFM	Y699_08707	A0A0D1VN85	7.5e-15	no	tNLRVCDKCIsRKVKcDQKRPVCSRCHEGGFACIYSSSKKKPGPA	Fungal specific transcription factor, putative	Aspergillus fumigatus Z5	Pathogen	Neosartorya fumigata (species), Aspergillus subgen. Fumigati (subgenus), Aspergillus (genus), Aspergillaceae (family), Eurotiales (order), Eurotiomycetidae (subclass), Eurotiomycetes (class), leotiomyceta (no rank), Pezizomycotina (subphylum), saccharomyceta (no rank), Ascomycota (phylum), Dikarya (subkingdom), Fungi (kingdom), Opisthokonta (no rank), Eukaryota (superkingdom), cellular organisms …
A0A0J5PJC7_ASPFM	Y699_08749	A0A017SGM2	9.1e-14	no	PKRMSCTRCQAKKIRCNRVEPRCDRCEAVGAQCTYLPRKTRSKNR	Fungal specific transcription factor, putative	Aspergillus fumigatus Z5	Pathogen	Neosartorya fumigata (species), Aspergillus subgen. Fumigati (subgenus), Aspergillus (genus), Aspergillaceae (family), Eurotiales (order), Eurotiomycetidae (subclass), Eurotiomycetes (class), leotiomyceta (no rank), Pezizomycotina (subphylum), saccharomyceta (no rank), Ascomycota (phylum), Dikarya (subkingdom), Fungi (kingdom), Opisthokonta (no rank), Eukaryota (superkingdom), cellular organisms …
A0A0J5PIS9_ASPFM	Y699_09024	B8MZ44	1.4e-16	no	KSAFSCEACRKRKVKCNGASPSCSRCAARGEACVYSlAPTLSYTK	C6 transcription factor	Aspergillus fumigatus Z5	Pathogen	Neosartorya fumigata (species), Aspergillus subgen. Fumigati (subgenus), Aspergillus (genus), Aspergillaceae (family), Eurotiales (order), Eurotiomycetidae (subclass), Eurotiomycetes (class), leotiomyceta (no rank), Pezizomycotina (subphylum), saccharomyceta (no rank), Ascomycota (phylum), Dikarya (subkingdom), Fungi (kingdom), Opisthokonta (no rank), Eukaryota (superkingdom), cellular organisms …
A0A0J5PK15_ASPFM	Y699_09043	A1CNM5	1.9e-11	no	HVRRACESCRQRKTKCTGDKSGCRNCREAGIICCYTDGKREKSKr	C6 transcription factor	Aspergillus fumigatus Z5	Pathogen	Neosartorya fumigata (species), Aspergillus subgen. Fumigati (subgenus), Aspergillus (genus), Aspergillaceae (family), Eurotiales (order), Eurotiomycetidae (subclass), Eurotiomycetes (class), leotiomyceta (no rank), Pezizomycotina (subphylum), saccharomyceta (no rank), Ascomycota (phylum), Dikarya (subkingdom), Fungi (kingdom), Opisthokonta (no rank), Eukaryota (superkingdom), cellular organisms …
A0A0J5PG88_ASPFM	Y699_09443	A0A0G4PGS9	1e-13	no	HDESvCDQCRARKIRCSREKPSCRNCGRLGLQCEWSGQGKKCNQT	Fungal specific transcription factor, putative	Aspergillus fumigatus Z5	Pathogen	Neosartorya fumigata (species), Aspergillus subgen. Fumigati (subgenus), Aspergillus (genus), Aspergillaceae (family), Eurotiales (order), Eurotiomycetidae (subclass), Eurotiomycetes (class), leotiomyceta (no rank), Pezizomycotina (subphylum), saccharomyceta (no rank), Ascomycota (phylum), Dikarya (subkingdom), Fungi (kingdom), Opisthokonta (no rank), Eukaryota (superkingdom), cellular organisms …
A0A1L9V4M6_ASPGL	ASPGLDRAFT_1187373	A0A1L9NBK6	8.8e-16	no	RTEVACTECRARKLKCEGSRPVCSRCHSLQLVCTYLTPPAADLRR	Fungal_trans domain-containing protein	Aspergillus glaucus CBS 516.65	Pathogen	Aspergillus glaucus (species), Aspergillus subgen. Aspergillus (subgenus), Aspergillus (genus), Aspergillaceae (family), Eurotiales (order), Eurotiomycetidae (subclass), Eurotiomycetes (class), leotiomyceta (no rank), Pezizomycotina (subphylum), saccharomyceta (no rank), Ascomycota (phylum), Dikarya (subkingdom), Fungi (kingdom), Opisthokonta (no rank), Eukaryota (superkingdom), cellular organism…
A0A1L9VPX5_ASPGL	ASPGLDRAFT_122139	A0A017SEW8	2.1e-13	no	VEIRVCTECRKRKSKCSGTSPCLYCSRNHKSCVFVRPPSRTPLT	Fungal_trans domain-containing protein	Aspergillus glaucus CBS 516.65	Pathogen	Aspergillus glaucus (species), Aspergillus subgen. Aspergillus (subgenus), Aspergillus (genus), Aspergillaceae (family), Eurotiales (order), Eurotiomycetidae (subclass), Eurotiomycetes (class), leotiomyceta (no rank), Pezizomycotina (subphylum), saccharomyceta (no rank), Ascomycota (phylum), Dikarya (subkingdom), Fungi (kingdom), Opisthokonta (no rank), Eukaryota (superkingdom), cellular organism…
[truncated: 13,055 more rows]

## Sheet: C2H2
Query_uniprot	Query_ensembl	Neighbor	HMM score	Isoform exists with C2H2	Corrected DBD sequence	Description	Organism	Animal or Plant Pathogenic Status	Taxonomy
[truncated: 748 more rows]
